# Supplementary material for: Brain-wide cellular resolution imaging of Cre transgenic zebrafish lines for functional circuit-mapping
Source: eLife. 2019 Feb 8;8:e42687. doi: 10.7554/eLife.42687 (PMC6392497; doi:10.7554/eLife.42687)
Supplement: Supplementary file 1. — Integration site given in zv10 coordinates, transgene orientation indicated in brackets. Integration sites inside genes are annotated, or nearest Refseq gene within ~50 kb indicated. [file elife-42687-supp1.xlsx]

## Sheet: Cre
Line	Vector	Integration site (zv10) chr:base(strand)	Expression	Publication
y371Et	REx2-SCP1-BGi-Cre-v2a-CFP	n/a	optic tectum, medulla oblongata (caudal), muscle	Marquart (2015)
y378Et	attp-REx2-SCP:BGi-Cre-v2a-CFP-attP	n/a	brain-specific, olfactory sensory neurons, pallium, subpallium, pineal complex, habenula	Marquart (2015)
y379Et	REx2-SCP1-BGi-Cre-v2a-CFP	6:58631990(-) Intron: sp7	brain-specific, pallium, anterior commissure, pineal complex, habenula, optic tectum, cerebellum, medulla (sparse)	Marquart (2015)
y380Et	REx2-SCP1-BGi-Cre-v2a-CFP	n/a	brain-specific, pallium,anterior commissure, habenula, optic tectum, cerebellum, medulla (rostral), Mauthner neurons	Marquart (2015)
y381Et	REx2-SCP1-BGi-Cre-v2a-CFP	12:8529347(-) 2550 bp from nrbf2b	brain-specific, cerebellum, medulla oblongata, Mauthner neurons	Marquart (2015)
y382Et	attp-REx2-SCP:BGi-Cre-v2a-CFP-attP	n/a	pallium, anterior commissure, optic tectum, tegmentum, cerebellum, medulla oblongata, muscle	Marquart (2015)
y383Et	attp-REx2-SCP:BGi-Cre-v2a-CFP-attP	7:40248497(+) 17414 bp from dnajb6b	brain-specific, pineal complex, tegmentum, cerebellum, medulla	Marquart (2015)
y384Et	REx2-SCP1-BGi-Cre-v2a-CFP	n/a	brain-specific, optic tectum, cerebellum	Marquart (2015)
y385Et	REx2-SCP1-BGi-Cre-v2a-CFP	n/a	pallium, habenula, optic tectum, jaw	Marquart (2015)
y445Et	REx2-SCP1:BGi-Cre-2a-Cer.zf3	3:32976789(-) Intron: rarab	pallium, habenula, medulla oblongata	This paper
y454Tg	eltC-REx2-SCP1:BGi-Cre-v2a-Cer	n/a	Rhombomere 3, Rhombomere 4, Rhombomere 5, Rhombomere 6	Tabor (2018)
y455Tg	[hoxb3a-dr16-gata2]-SCP1:BGi-Cre-v2a-Cer	n/a	Rhombomere 5, Rhombomere 6	Tabor (2018)
y456Et	REx2-SCP1:BGi-Cre-2a-Cer.zf3	n/a	medulla oblongata	This paper
y457Et	REx2-SCP1:BGi-Cre-2a-Cer.zf3	n/a	broad (possibly pan-neuronal)	This paper
y458Et	REx2-SCP1:BGi-Cre-2a-Cer.zf3	n/a	optic tectum, torus semicircularis, cerebellum, medulla oblongata	This paper
y459Et	REx2-SCP1:BGi-Cre-2a-Cer.zf3	9:34806701(-) 25351 bp from shox	habenula, optic chiasm, optic tectum, thalamus, hypothalamus	This paper
y461Tg	hoxb1a-SCP1:BGi-Cre-v2a-Cer	n/a	Rhombomere 4, Rhombomere 5, Rhombomere 6, Rhombomere 7	Tabor (2018)
y465Et	REx2-SCP1:BGi-Cre-2a-Cer	n/a	Rhombomere 3, Rhombomere 5	This paper
y466Tg	hoxa2-SCP1:BGi-Cre-v2a-Cer	n/a	Rhombomere 2	Tabor (2018)
y478Et	attP-REx2-SCP1:BGi-Cre-2a-Cer-attP	22:15873060(-) Exon: klf2a	olfactory epithelium, subpallium	This paper
y479Et	attP-REx2-SCP1:BGi-Cre-2a-Cer-attP	n/a	olfactory epithelium+bulb, pallium, optic tectum, thalamus, hypothalamus, valvula cerebelli, corpus cerebelli, trigeminal ganglion, vagal ganglion, muscle, intestine, heart, skin	This paper
y480Et	attP-REx2-SCP1:BGi-Cre-2a-Cer-attP	n/a	optic tectum, heart, muscle	This paper
y481Et	attP-REx2-SCP1:BGi-Cre-2a-Cer-attP	n/a	torus longitudinalis, pallium, cerebellum	This paper
y483Et	attP-REx2-SCP1:BGi-Cre-2a-Cer-attP	n/a	olfactory epithelium, olfactory bulb, subpallium, habenula, optic tectum (cellular layer), hypothalamus - diffuse nucleus, rhombomere 4 (dorsal cluster)	This paper
y484Et	REx2-SCP1:BGi-Cre-2a-Cer	8:15102079(+) Intron: bcar3	pallium	This paper
y485Et	REx2-SCP1:BGi-Cre-2a-Cer.zf3	n/a	pallium, medulla oblongata (Rhombomere 6 to spinal cord)	This paper
y486Et	REx2-SCP1:BGi-Cre-2a-Cer.zf3	n/a	cerebellum	This paper
y487Et	REx2-SCP1:BGi-Cre-2a-Cer.zf3	5:49022874(-)	pallium, cerebellum, medulla oblongata (dorsal area in rhombomere 2, rhombomere 3, rhombomere 4, rhombomere 5)	This paper
y488Et	REx2-SCP1:BGi-Cre-2a-Cer.zf3	25:14850800(+) 48091 bp from dnajc24	olfactory bulb, pallium, habenula, pretectum, thalamus, cerebellum, medulla oblongata	This paper
y489Et	REx2-SCP1:BGi-Cre-2a-Cer.zf3	n/a	olfactory epithelium, rhombomere 5	This paper
y490Et	REx2-SCP1:BGi-Cre-2a-Cer.zf3	19:31376385(-) 29736 bp from sync	rhombomere 5	This paper
y492Et	REx2-SCP1:BGi-Cre-2a-Cer.zf3	n/a	medulla oblongata	This paper
y493Et	REx2-SCP1:BGi-Cre-2a-Cer.zf3	1:45228474(-) Intron: pnpla6	retinotectal tract, olfactory epithelium	This paper
y494Et	REx2-SCP1:BGi-Cre-2a-Cer.zf3	n/a	tegmentum	This paper
y495Et	REx2-SCP1:BGi-Cre-2a-Cer.zf3	22:30270429(-) Intron: add3a	medulla oblongata, radial glia (optic tectum)	This paper
y519Et	REx2-SCP1:BGi-Cre-2a-Cer	n/a	optic tectum	This paper
y520Et	REx2-SCP1:BGi-Cre-2a-Cer	n/a	pallium, cerebellum	This paper
y521Et	REx2-SCP1:BGi-Cre-2a-Cer.zf3	14:16528387(+) Intron: limch1b	medulla oblongata (caudal area)	This paper
y523Et	REx2-SCP1:BGi-Cre-2a-Cer.zf3	n/a	Mauthner cells, Rhombomere 6	This paper
y524Et	REx2-SCP1:BGi-Cre-2a-Cer	n/a	otic vesicle hair cells	This paper
y526Et	REx2-SCP1:BGi-Cre-2a-Cer.zf3	5:38414082(-) Intron: fras1	optic tectum, habenula	This paper
y528Et	REx2-SCP1:BGi-Cre-2a-Cer.zf3	6:55647153(+)	habenula (including fasciculus retroflexus), optic tectum, trigeminal ganglion	This paper
y541Et	REx2-SCP1:BGi-Cre-2a-Cer.zf3	n/a	pallium, optic tectum, cerebellum	This paper
y542Et	REx2-SCP1:BGi-Cre-2a-Cer.zf3	n/a	Rhombomere 6	This paper
y543Et	REx2-SCP1:BGi-Cre-2a-Cer.zf3	n/a	olfactory epithelium, subpallium, thalamus, pretectum, optic tectum, torus semicircularis, hypothalamus	This paper
y544Et	REx2-SCP1:BGi-Cre-2a-Cer.zf3	n/a	rhombomere 5, jaw	This paper
y545Et	REx2-SCP1:BGi-Cre-2a-Cer.zf3	n/a	Mauthner cells	This paper
y546Et	REx2-SCP1:BGi-Cre-2a-Cer.zf3	n/a	olfactory bulb, pallium, subpallium, habenula, pineal, optic tectum, thalamus, corpus cerebelli	This paper
y547Et	REx2-SCP1:BGi-Cre	n/a	subpallium, medulla oblongata (dorsal)	This paper
y548Et	REx2-SCP1:BGi-Cre	n/a	pallium, tegmentum, rhombomere 1, retina	This paper
y549Et	REx2-SCP1:BGi-Cre	n/a	rhombomere 2, rhombomere 4	This paper
y550Et	REx2-SCP1:BGi-Cre	n/a	olfactory bulb, pallium	This paper
y551Et	REx2-SCP1:BGi-Cre-2a-Cer.zf3	n/a	optic tectum (caudal domain)	This paper
y552Et	REx2-SCP1:BGi-Cre-2a-Cer.zf3	n/a	subpallium, telencephalic migrated area M4, hypothalamus - rostral zone, migrated posterior tubercular area M2, hypothalamus - intermediate zone	This paper
y554Et	REx2-SCP1:BGi-Cre-2a-Cer.zf3	n/a	medulla oblongata (lateral longitudinal column)	This paper
y555Et	REx2-SCP1:BGi-Cre	n/a	olfactory bulb, pallium, corpus cerebelli, optic tectum - stratum periventriculare, medulla oblongata (dorsal region)	This paper
y556Et	REx2-SCP1:BGi-Cre	n/a	olfactory bulb, pallium, optic tectum, optic tract, torus semicircularis, corpus cerebelli, medulla oblongata	This paper
y557Et	REx2-SCP1:BGi-Cre	n/a	thalamus, optic tract, optic tectum, valvula cerebelli, corpus cerebelli, medulla oblongata (caudal)	This paper
y558Et	REx2-SCP1:BGi-Cre-2a-Cer.zf3	n/a	olfactory bulb, pallium, optic tectum, torus semicircularis, cerebellum, medulla oblongata	This paper
y559Et	REx2-SCP1:BGi-Cre	n/a	Rhombomere 5 (dorsal domain), Rhombomere 6 (longitudinal column)	This paper
y568Et	REx2-SCP1:BGi-Cre-2a-Cer.zf3	n/a	ventral thalamus, Rhombomere 4, Rhombomere 5	This paper
y569Et	REx2-SCP1:BGi-Cre	n/a	olfactory epithelium, valvular cerebelli	This paper
y570Et	REx2-SCP1:BGi-Cre	n/a	Rhombomere 2, Rhombomere 3	This paper
y571Et	R2R6-hoxa2-CNE-SCP1:BGi-Cre-2a-Cer	n/a	Rhombomere 2, Rhombomere 6	This paper
y574Et	REx2-SCP1:BGi-Cre	n/a	olfactory bulb, pallium, habenula, optic tectum, griseum tectale, corpus cerebelli, medulla oblongata	This paper
Supplementary File 1. Summary of ZBB2 Cre lines
Integration site given in zv10 coordinates, transgene orientation indicated in brackets. Integration sites inside genes are annotated, or nearest Refseq gene (if within 50kb) indicated.
