# Supplementary material for: Brain-wide cellular resolution imaging of Cre transgenic zebrafish lines for functional circuit-mapping
Source: eLife. 2019 Feb 8;8:e42687. doi: 10.7554/eLife.42687 (PMC6392497; doi:10.7554/eLife.42687)
Supplement: Supplementary file 2. — Coordinate system for mapped lines is either zv9 or zv10 as indicated. [file elife-42687-supp2.xlsx]

## Sheet: Gal4.tsv
Line	Vector	Integration site (zv9/10) chr:base(strand)	Expression	Publication
y234Et	SCP1:Gal4ff	10:28607866(+)z9 51288 bp from ints2	trigeminal ganglion, pineal complex (projection neurons), medulla (caudal), retina, spinal cord, weak heart, weak muscle, axial vasculature (intersegmental vessels)	Yokogawa J Neurosci (2012)
y236Et	REx2-cfos:kGal4ff	14:32488427(-)z9 343 bp from mmgt1	brain-specific, olfactory sensory neurons, hypothalamus - caudal zone, retina, spinal cord	Bergeron Front Neural Circuits (2012)
y237Et	REx2-cfos:kGal4ff	25:19691130(-)z9 176 bp from hapln3	brain-specific, optic tectum, vagal region, spinal cord	Bergeron Front Neural Circuits (2012)
y240Et	cfos:kGal4ff	22:18778916(+)z9 8555 bp from cirbp	olfactory sensory neurons, olfactory bulb, pineal complex, posterior tuberculum, rhombomere 3, rhombomere 5, pLLg, lateral line, retina, spinal cord, strong lens, weak heart, weak notochord, fast muscle, median fin fold, punctate cells on yolk and extension, integument	Marquart Front Neural Circuits (2015)
y241Et	REx2-SCP1:kGal4ff	1:619473(-)z9 First intron: dusp27	hypothalamus - caudal zone, retinal ganglion cells, retinotectal tract, optic tectum, fast muscle, weak heart	Fero Dis Mod Mech (2013)
y242Et	REx2-SCP1:Gal4	16:11407834(+)z10 Intron: znf574	olfactory bulb, subpallium, habenula, pineal, pretectum, locus coeruleus, medulla oblongata, retina, spinal cord (radial glia), motor neurons, slow muscle (weak), integument (strong in patch dorsal to rhombomere 5), habenula, heart (weak)	This paper
y244Et	REx2-SCP1:kGal4ff	n/a	subpallium, habenula (lateral region;plus fasciculus retroflexus terminating below median raphe), band of neurons from posterior tuberculum to hypothalamus (intermediate), hypothalamus - caudal zone, retina, spinal cord strong fast muscle, liver	Bergeron Front Neural Circuits (2012)
y245Et	SCP1:Gal4ff	8:41559388(-)z9 161 bp from msi1	brain-specific, habenula (left;medial region), periventricular cells, pineal complex, medulla oblongata (dorsal;caudal), retina, spinal cord, broad moderate intensity brain expression	Marquart Front Neural Circuits (2015)
y249Et	REx2-SCP1:kGal4ff	Un_KN150107v1:41677(?)z10 no adjacent genes	brain-specific, olfactory sensory neurons, subpallium (lateral/ventral), pineal complex, Nuc MLF, posterior commissure, hypothalamus - caudal zone, aLLg, pLLg, habenula (left), retinotectal tract, otic vesicle cristae, cerebellum, medulla (anterior and longitudinal stripes), spinal cord	Marquart Front Neural Circuits (2015)
y252Et	REx2-SCP1:kGal4ff	5:71036701(-)z9 20796 bp from gsx1	posterior tuberculum, griseum tectale, optic tectum, hypothalamus, cerebellum, medulla (longitudinal stripe; hindbrain commissures), retina, spinal cord	Bergeron Mol Psych (2015)
y255Et	REx2-cfos:kGal4ff	4:8078727(+)z9 First intron: scube1	brain-specific, posterior tuberculum, medulla (caudal)	Marquart Front Neural Circuits (2015)
y256Et	SCP1:Gal4ff	18:39202322(-)z9 Intron: pglyrp5	statoacoustic ganglion (selective;strong), retina, spinal cord	Marquart Front Neural Circuits (2015)
y264Et	SCP1:Gal4ff	17:49286618(+)z9 Exon: TIAM2(1of2)	olfactory sensory neurons, pallium, subpallium, torus longitudinalis, Mauthner neurons, reticulospinal neurons, cerebellum (eminentia granularis), weak intestine, weak heart, weak muscle	Tabor J Neurophysiol (2014)
y265Et	SCP1:Gal4ff	1:54550186(+)z9 Exon: rhou(1of3)	olfactory epithelium, subpallium, pineal, thalamus, tegmentum, medulla oblongata (longitudinal stripes), retina, ocular muscle, motor neurons, esophagus	This paper
y269Et	REx2-cfos:kGal4ff	20:32151328(+)z9 1555 bp from grm1a	brain-specific, pallium (central zone), optic tectum, hypothalamus - caudal zone, retinotectal tract, medulla (longitudinal stripe), aLLg, pLLg, spinal cord	Tabor J Neurophysiol (2014)
y270Et	REx2-cfos:kGal4ff	10:40378086(+)z9 Intron: igsf5a	brain-specific, pallium (dorso-medial telencephalon), pineal (selective), reticulospinal neurons (small subset), medulla (caudal; ventral), motor neurons, retina, spinal cord	Tabor J Neurophysiol (2014)
y271Et	SCP1:kGal4ff	n/a	brain (broad, strong), spinal cord (broad), heart (weak), muscle (weak), notochord (weak)	Horstick EJ Nuc Ac Res (2015)
y274Et	SCP1:Gal4ff	5:51191297(-)z9	brain (broad), spinal cord (broad), notochord, heart, slow muscle, fins, ocular muscle	This paper
y275Et	REx2-SCP1:kGal4ff	18:21417110(-)z10 2631 bp from necab2	olfactory sensory neurons, subpallium, preoptic region, pretectum, optic tectum, tegmentum, cerebellar plate, cerebellum (eminentia granularis), torus longitudinalis, torus semicircularis, hypothalamus, medulla (caudal), retina, motor neurons, punctate cells on yolk	Marquart Front Neural Circuits (2015)
y279Et	REx2-SCP1:kGal4ff	n/a	subpallium, preoptic region, habenula (left;medial region), ventral thalamus, hypothalamus - caudal zone, trigeminal ganglion, statoacoustic ganglion, aLLg, pLLg, lateral line, optic tectum (radial glia), reticulospinal neurons, medulla (medial cluster), retina, spinal cord	Marquart Front Neural Circuits (2015)
y293Et	tphR:Gal4ff	19:29918823(-)z9 First intron: fndc5b	pineal complex, tegmentum, posterior commissure, dorsal raphe, medulla (two clusters: antero-lateral;dorso-medial), retina, spinal cord, notochord	Marquart Front Neural Circuits (2015)
y294Et	tphR:Gal4ff	22:24988502(+)z9 2610 bp from C22H1orf53	brain-specific, olfactory sensory neurons, pallium, subpallium, pineal complex, habenula (plus fasciculus retroflexus), thalamus, posterior tuberculum, dorsal raphe, optic tectum, tegmentum, torus semicircularis, medulla oblongata, hindbrain commissures, retina, spinal cord (ventral)	Marquart Front Neural Circuits (2015)
y295Et	cfos:Gal4ff	n/a	medulla (rhombomere 4;rhombomere 6), spinal cord (primary motor neurons), heart	Marquart Front Neural Circuits (2015)
y296Et	cfos:Gal4ff	22:9916974(-)z9 42 bp from si:ch211-236g6.1	olfactory sensory neurons (selective), hypothalamus - caudal zone, pituitary (pars anterior), neuromasts (hair cells;mantle cells;glia), integument (weak), punctate cells on integument, branchial arches	Marquart Front Neural Circuits (2015)
y297Et	cfos:Gal4ff	11:12425507(+)z10 Intron: zgc:174353	brain-specific, trigeminal, pLLg, lateral line, medulla (ventral longitudinal stripe), pituitary (pars intermedia), retina, motor neurons	Marquart Front Neural Circuits (2015)
y298Et	tphR:Gal4ff	9:5189792(+)z9 12901 bp from CU207353.2	brain-specific, pallium (small rostral cluster), pineal complex, habenula, optic tectum, pLLg, cerebellum, medulla oblongata, retina, spinal cord	Marquart Front Neural Circuits (2015)
y299Et	cfos:kGal4ff	10:39345827(+)z9 10634 bp from WSCD1(2of3)	olfactory bulb, pallium, tegmentum, medulla oblongata, hypothalamus - caudal zone, primary motor neurons (strong), weak heart	Marquart Front Neural Circuits (2015)
y300Et	cfos:kGal4ff	24:25072485(-)z9 1191 bp from bhlhe22	brain-specific, pallium, retinotectal tract, posterior tuberculum, preglomerula complex (M2), optic tectum (neuropil), hypothalamus, cerebellum (cerebellar plate), medulla (anterior cluster; caudal medial longitudinal stripe), retina (retinal ganglion cells), spinal cord	Marquart Front Neural Circuits (2015)
y301Et	cfos:Gal4ff	7:39422607(+)z9 55232 bp from cebpa	medulla (caudal), retina (photoreceptor layer), intestine, blood, weak heart, liver	Marquart Front Neural Circuits (2015)
y302Et	cfos:kGal4ff	20:31771236(+)z9 621 bp from stxbp5a	habenula (medial region), tegmentum, posterior tuberculum, inferior olive, retina, notochord, integument (patches above medulla oblongata and around heart), weak heart, weak muscle	Marquart Front Neural Circuits (2015)
y303Et	cfos:kGal4ff	n/a	posterior tuberculum, trigeminal ganglion, medulla (small cluster), punctate cells on yolk, weak heart, muscle	Marquart Front Neural Circuits (2015)
y304Et	cfos:kGal4ff	16:7507246(-)z9 43295 bp from CMTM8(1of2)	habenula, pretectum, ventral thalamus, optic tectum (cells; fibres from tectum descending into hindbrain), torus longitudinalis, hypothalamus - caudal zone, retina, spinal cord, weak muscle, strong heart	Marquart Front Neural Circuits (2015)
y305Et	cfos:kGal4ff	n/a	pallium, subpallium, habenula, cerebellum (eminentia granularis), retina, spinal cord, caudal tip of tail, weak muscle	Marquart Front Neural Circuits (2015)
y306Et	REx2-SCP1:kGal4ff	5:3818536(+)z10 3' UTR: si:ch211-283g2.1	brain-specific, preoptic region (selective)	Marquart Front Neural Circuits (2015)
y307Et	REx2-SCP1:kGal4ff	15:40794745(-)z9 Exon: farsb	medulla (three discrete clusters: anterior; in r4; longitudinal stripe), retina, spinal cord, intestine	Marquart Front Neural Circuits (2015)
y308Et	tphR:Gal4ff	19:47897584(+)z10 1465 bp from tfap2e	brain-specific, olfactory sensory neurons, olfactory bulb, optic tectum, dorsal raphe, medulla (rostral)	Marquart Front Neural Circuits (2015)
y309Et	REx2-SCP1:kGal4ff	n/a	posterior commissure, Nuc MLF, aLLg, pLLg, retina, weak blood, cells on intestine	Marquart Front Neural Circuits (2015)
y310Et	REx2-SCP1:kGal4ff	1:23474284(-)z9 17479 bp from si:ch211-188p14.8	brain-specific, pineal complex, posterior tuberculum, hypothalamus - caudal zone, optic tectum (sparse)	Marquart Front Neural Circuits (2015)
y311Et	REx2-SCP1:kGal4ff	n/a	pallium, subpallium, anterior commissure, preoptic region, thalamic eminence, pineal complex, habenula, optic tectum, inferior olive, cerebellum, habenula, retina, spinal cord, intestine, jaw, weak heart	Marquart Front Neural Circuits (2015)
y312Et	REx2-SCP1:kGal4ff	1:21429774(-)z9 Intron: anxa5b	brain-specific, olfactory sensory neurons (selective), olfactoy bulb, subpallium, retina, spinal cord	Marquart Front Neural Circuits (2015)
y313Et	REx2-SCP1:kGal4ff	15:52608(+)z9 1696 bp from si:zfos-411a11.2	brain-specific, posterior tuberculum, Nuc MLF, medulla (caudal), retina, spinal cord	Marquart Front Neural Circuits (2015)
y314Et	SCP1:Gal4ff	14:31129791(+)z9 12733 bp from asah1a	medulla (rostral; caudal ventro-medial clusters), retina (photoreceptor layer), spinal cord, weak heart, weak muscle	Marquart Front Neural Circuits (2015)
y315Et	cfos:Gal4ff	n/a	medulla (caudal), spinal cord (strong; broad;motor neurons), strong heart	Marquart Front Neural Circuits (2015)
y316Et	cfos:Gal4ff	3:51530714(-)z9 95609 bp from AL929327.3	olfactory sensory neurons (discrete rostro-medial cluster), retinotectal tract, spinal cord, weak notochord, weak pancreas	Marquart Front Neural Circuits (2015)
y317Et	SCP1:Gal4ff	10:6763413(-)z9 Exon: snx24	posterior tuberculum, trigeminal ganglion, pLLg, reticulospinal neurons, spinal cord, heart, muscle	Marquart Front Neural Circuits (2015)
y318Et	REx2-SCP1:kGal4ff	7:47621609(-)z9 Intron: zgc:162297	cerebellum (selective; cerebellar plate; eminentia granularis), pLLg, cranial sensory ganglia, spinal cord, intestine	Marquart Front Neural Circuits (2015)
y319Et	REx2-SCP1:kGal4ff	1:40177687(-)z9 Intron: dctd	habenula (strong lateral;plus fasciculus retroflexus to below median raphe), Nuc MLF, statoacoustic ganglion (restricted portion with dorsal projection), retina, spinal cord, weak heart	Marquart Front Neural Circuits (2015)
y320Et	REx2-SCP1:kGal4ff	19:28217946(-)z10 28649 bp from papd7	olfactory sensory neurons, pallium, preoptic region, posterior tuberculum, hypothalamus, aLLg, pLLg, strong cranial sensory ganglia (plus plexus in medulla), inferior olive, retina, spinal cord, swim bladder, lens	Marquart Front Neural Circuits (2015)
y321Et	REx2-SCP1:kGal4ff	2:11002513(+)z9 1032 bp from lhx8a	brain-specific, subpallium, preoptic region, rostral hypothalamus, posterior tuberculum	Marquart Front Neural Circuits (2015)
y322Et	REx2-SCP1:kGal4ff	19:44346108(-)z9 Intron: clasp2	brain-specific, olfactory sensory neurons, medulla (small rostral cluster),retina, spinal cord	Marquart Front Neural Circuits (2015)
y323Et	REx2-SCP1:kGal4ff	7:54648943(-)z9 Exon: fgf3	subpallium, posterior tuberculum, hypothalamus - caudal zone, cerebellum, rhombomere 4, otic vesicle maculae, retina, heart, slow muscle	Marquart Front Neural Circuits (2015)
y324Et	cfos:Gal4ff	12:40486192(-)z9 Intron: si:dkey-239b22.1	brain-specific, medulla (ventro-medial cluster of neurons), retina, spinal cord	Marquart Front Neural Circuits (2015)
y325Et	SCP1:Gal4ff	2:22371041(+)z10 Intron: tox	olfactory sensory neurons, posterior tuberculum, optic tectum, pituitary, reticulospinal neurons, trigeminal ganglion, aLLg, pLLg, neuromasts (strong), medulla (caudal/dorsal and longitudinal stripe), otic vesicle maculae, retinotectal tract, spinal cord, endocrine pancreas, fast muscle	Marquart Front Neural Circuits (2015)
y326Et	cfos:kGal4ff	3:50931110(+)z9 25527 bp from TRIM35(3of41)	brain-specific, reticulospinal neuron (selective; two bilateral pairs), pituitary (pars anterior)	Marquart Front Neural Circuits (2015)
y327Et	REx2-cfos:kGal4ff	3:10432998(-)z9 34994 bp from si:ch73-208g21.1	brain-specific, hypothalamus - rostral zone (selective), subpallium, posterior tuberculum, medulla (medio-lateral cluster), pLLg, neuromasts	Marquart Front Neural Circuits (2015)
y328Et	REx2-cfos:kGal4ff	16:29654676(-)z9 Exon: erp44	brain-specific, subpallium, habenula (plus fasciculus retroflexus), torus longitudinalis, medulla (dorsal caudal), floorplate (brain and spinal cord), retina	Marquart Front Neural Circuits (2015)
y329Et	REx2-cfos:kGal4ff	2:18388917(+)z9 13027 bp from 5S-rRNA	subpallium, thalamic eminence, ventral thalamus, posterior tuberculum, hypothalamus - caudal zone, optic tectum, vagal region, motor neurons, retina, punctate cells on yolk	Marquart Front Neural Circuits (2015)
y330Et	cfos:kGal4ff	6:4283166(-)z9 7609 bp from RBM26	habenula (strong; plus fasciculus retroflexus to interpeduncular nucleus), inferior olive, trigeminal ganglion, aLLg, statoacoustic ganglion, pLLg, muscle, pronephric ducts, retina, spinal cord	Marquart Front Neural Circuits (2015)
y331Et	REx2-cfos:kGal4ff	n/a	brain-specific, pallium, optic tectum (neuropil), medulla (clusters), reticulospinal neurons, retina, spinal cord	Marquart Front Neural Circuits (2015)
y332Et	REx2-cfos:kGal4ff	24:27249324(+)z9 Intron: slc7a14b	brain-specific, habenula (right;medial;plus fasciculus retroflexus), hypothalamus - caudal zone, otic maculae, retina, spinal cord	Marquart Front Neural Circuits (2015)
y333Et	REx2-cfos:kGal4ff	2:54258467(+)z10 9673 bp from ctnnbl1	brain-specific, hypothalamus -caudal zone (selective), medulla oblongata, spinal cord	Marquart Front Neural Circuits (2015)
y334Et	REx2-cfos:kGal4ff	5:57921796(+)z10 Intron: pou2f3	brain-specific, cerebellum, medulla (discrete clusters), reticulospinal neurons, retina, spinal cord	Marquart Front Neural Circuits (2015)
y336Et	REx2-SCP1:kGal4ff	22:22987582(+)z10 Intron: ptprc	optic tectum, retinotectal tract (strong), hypothalamus - caudal zone, pituitary (strong; pars intermedia), medulla (caudal/ventral), retina, spinal cord, pancreas	Marquart Front Neural Circuits (2015)
y337Et	REx2-cfos:kGal4ff	2:10272050(+)z9 Intron: CCDC18 (1 of 2)	brain-specific, pLLg, spinal cord (floorplate)	Marquart Front Neural Circuits (2015)
y338Et	cfos:kGal4ff	n/a	brain-specific, pretectum (migrated area), optic tectum (anterior/lateral), medulla (rostral), neuromasts (sparse), retina	Marquart Front Neural Circuits (2015)
y339Et	REx2-cfos:kGal4ff	n/a	brain-specific, hypothalamus - rostral zone (selective), pallium, retina	Marquart Front Neural Circuits (2015)
y341Et	REx2-cfos:kGal4ff	14:31278235(-)z10 398 bp from mmgt1	brain-specific, hypothalamus - caudal zone (selective), retina, spinal cord	Marquart Front Neural Circuits (2015)
y342Et	REx2-cfos:kGal4ff	21:44291658(+)z9 10743 bp from si:ch211-25g7.3	brain-specific, medulla (caudal cluster), pLLG, retina, spinal cord	Marquart Front Neural Circuits (2015)
y345Et	REx2-cfos:kGal4ff	9:10031215(+)z9 First intron: fstl1b	brain-specific, subpallium, reticulospinal neurons, medulla (caudal cluster), retina, spinal cord	Marquart Front Neural Circuits (2015)
y347Et	REx2-SCP1:kGal4ff	25:654264(-)z9 211 bp from znf609a	hypothalamus - caudal zone (selective), medulla oblongata, floorplate, retina	Marquart Front Neural Circuits (2015)
y348Et	REx2-SCP1:kGal4ff	3:7519484(-)z9 1180 bp from BX000701.2	olfactory sensory neurons, posterior tuberculum, tegmentum, trigeminal ganglion, reticulospinal neurons, retina, spinal cord	This paper
y350Et	SCP1:Gal4ff	23:242920(-)z9 First intron: PDZD4	Habenula (right), thalamus, hypothalamus - rostral zone, tegmentum, trigeminal motor neurons - posterior, medulla oblongata	Marquart Front Neural Circuits (2015)
y351Et	SCP1:Gal4ff	8:26512923(+)z9 Intron: sema3ga	olfactory sensory neurons, Nuc MLF, posterior commissure, medulla (dorsal/caudal), hindbrain commissures, retina, spinal cord, fin	Marquart Front Neural Circuits (2015)
y352Et	SCP1:Gal4ff	9:22412697(+)z10 Intron: crygm2d8	medulla oblongata (small lateral cluster in ~rhombomere 6), lens, retina	Marquart Front Neural Circuits (2015)
y353Et	cfos:kGal4ff	14:6556477(+)z10 68318 bp from si:ch211-266k2.1	pretectum, hypothalamus - caudal zone, medulla (discrete clusters), pLLg, strong lens, esophagus/pharynx, jaw, ocular muscle, fins	Marquart Front Neural Circuits (2015)
y354Et	REx2-SCP1:kGal4ff	n/a	retinotectal tract (selective; additional retinal arborization fields), medulla oblongata, spinal cord, strong heart, intestine	Marquart Front Neural Circuits (2015)
y355Et	tphR:Gal4ff	7:47999107(-)z9 First intron: znf536	dorsal raphe, medulla oblongata (two clusters), otic vesicle cristae, lateral line (glia), retina, spinal cord, weak heart, weak notochord, weak ocular muscle	Marquart Front Neural Circuits (2015)
y356Et	SCP1:Gal4ff	n/a	cerebellum (cerebellar plate), optic tectum (radial glia), retina, spinal cord, heart, fast muscle, integument, yolk, fin, branchial arches	Marquart Front Neural Circuits (2015)
y357Et	REx2-SCP1:kGal4ff	n/a	pallium, subpallium, pineal complex, dorsal thalamus, ventral thalamus, optic tectum, tegmentum, inferior olive, cranial sensory ganglia, pLLg, lateral line (innervation of neuromasts), retina, spinal cord, weak muscle, punctate cells on pectoral fin, median fin fold	Marquart Front Neural Circuits (2015)
y358Et	REx2-cfos:kGal4ff	n/a	vagal region, cranial sensory ganglia, motor neurons, retina, weak muscle, floorplate, swimbladder	Marquart Front Neural Circuits (2015)
y359Et	-3.0dbh:Gal4ff	n/a	brain-specific, trigeminal motor neurons - anterior	Marquart Front Neural Circuits (2015)
y364Et	SCP1:Gal4ff	14:18043955(+)z10 321736 bp from slitrk4	pallium, radial glia (telencephalon/diencephalon), pineal complex, hypothalamus - caudal zone, pLLg, lateral line, neuromasts (head and trunk), medulla (radial glia), retina, spinal cord, muscle, integument (weak)	Marquart Front Neural Circuits (2015)
y365Et	cfos:Gal4ff	18:24119849(+)z10 231334 bp from nr2f2	broadly expressed, thalamus, ventral midbrain, cerebellum, medulla oblongata, motor neurons, retina, weak heart, weak vasculature	Marquart Front Neural Circuits (2015)
y372Et	SCP1:Gal4ff	1:46762378(-)z9 Exon: atp11a	hypothalamus - rostral zone, reticulospinal neurons, otic vesicle cristae, trigeminal ganglion, aLLg, pLLg, retina, spinal cord, fast muscle, heart	Marquart Front Neural Circuits (2015)
y373Et	REx2-SCP1:kGal4ff	22:20316172(-)z9 First intron: celf5a	pallium, subpallium, habenula, optic tectum, torus longitudinalis, torus semicircularis, inferior olive, weak motor neurons, weak muscle, cells on intestine	Marquart Front Neural Circuits (2015)
y375Et	SCP1:Gal4ff	7:43085823(+)z10 Intron: BX005003.1	subpallium, pineal complex, habenula (lateral;fasciculus retroflexus to below medial raphe), ventral thalamus, pituitary, medulla oblongata, Nuc MLF, medulla, motor neurons, retina, spinal cord, strong heart, weak ventral fin	Marquart Front Neural Circuits (2015)
y387Et	tph2:Gal4ff	24:40333322(-)z9 3501 bp from nog2	olfactory bulb, subpallium, habenula, medulla oblongata, dorsal raphe, retina, spinal cord, muscle (including ocular muscle), fin, notochord	This paper
y388Et	SCP1:Gal4ff	7:65387548(+)z9 19959 bp from lypla1	vasculature (intersegmental vessels)	Marquart Front Neural Circuits (2015)
y393Et	cfos:Gal4ff	19:40581722(+)z9 First intron: BAI2	olfactory sensory neurons, pallium, subpallium, pineal, habenula (lateral), trigeminal ganglion, hypothalamus, pituitary, otic vesicle maculae (posterior), retina, spinal cord, floorplate, fast muscle	Marquart Front Neural Circuits (2015)
y394Et	cfos:Gal4ff	24:13365039(+)z9 Intron: kcnb2(2of2)	olfactory bulb, subpallium, posterior tuberculum, facial octavolateralis motor neurons, vagus motor neurons, inferior olive, motor neurons, ocular muscle, strong pectoral fin, yolk extension, weak slow muscle	This paper
y396Et	SCP1:Gal4ff	10:172834(-)z9 First intron: pigp	olfactory bulb, medulla oblongata, aLLg, pLLg, branchial arches, endocrine pancreas, neuromasts, retina, spinal cord	Marquart Front Neural Circuits (2015)
y397Et	SCP1:Gal4ff	10:8107827(-)z9 First intron: Talin1	aLLg, pLLg, lateral line, blood, fin, notochord (strong), muscle (weak)	Marquart Front Neural Circuits (2015)
y401Et	cfos:Gal4ff	10:17306571(-)z9 17614 bp from stoml2	optic tectum (radial glia), ventricles, olfactory epithelium, muscle (weak), heart (weak), yolk	Marquart Front Neural Circuits (2015)
y405Et	SCP1:Gal4ff	15:38142438(+)z9 Intron: Robo2	olfactory epithelium, preoptic area, trigeminal ganglion, locus coeruleus, optic tectum, medulla oblongata, retina, spinal cord, muscle	Marquart Front Neural Circuits (2015)
y407Et	SCP1:Gal4ff	3:43696002(+)z9 Exon: psmg3	subpallium, telencephalic migrated area M4, hypothalamus, optic tectum (neuropil), diencephalon, tegmentum, neuromasts (head, trunk), pLLg, weak muscle, endocrine pancreas, median fin fold, medulla (caudal dorso-lateral)	Marquart Front Neural Circuits (2015)
y412Et	cfos:Gal4ff	11:29785662(-)z9 Intron: igsf21a	subpallium, tegmentum, eminentia granularis, corpus cerebelli, medulla oblongata, heart	This paper
y416Et	cfos:Gal4ff	15:17514660(-)z9 First intron: ncam1b	pineal complex, hypothalamus - rostral zone, optic tectum (neuropil), vagal ganglion, aLLg, pLLg, lateral line, cranial sensory ganglia, dorsal root ganglia, retina, spinal cord, intestine, weak notochord, weak ventral fast muscle	This paper
y417Et	REx2-SCP1:Gal4ff	24:4752371(+)z9 82747 bp from cpb1	olfactory epithelium, telencephalon (ventral midline), lateral habenula, optic tectum, medulla oblongata, vagal ganglion, heart (strong), intestine (strong), somite boundaries, neuromasts (head only)	Marquart Front Neural Circuits (2015)
y420Et	REx2-cfos:Gal4ff	11:25874207(+)z9 First intron: sulf2a	olfactory sensory neurons, hypothalamus - rostral zone, posterior tuberculum, tegmentum, medulla oblongata (rostral nuclei), aLLg, pLLg, lateral line, neuromasts, spinal cord, floorplate, blood	Marquart Front Neural Circuits (2015)
y421Et	REx2-cfos:Gal4	12:26823958(-)z9 2210 bp from hcar1-4	pallium, thalamus, posterior tuberculum, hypothalamus - rostral zone, meninges, retina, spinal cord, yolk, muscle, notochord, fin, jaw	This paper
y423Et	REx2-cfos:Gal4ff	20:15525164(-)z9 9667 bp from si:dkey-86e18.4	optic tectum (neuropil), medulla oblongata (several clusters), vagus motor neurons, trigeminal ganglion, aLLg, pLLg, vagal ganglion, retina, spinal cord, endocrine pancreas, notochord	Marquart Front Neural Circuits (2015)
y425Et	REx2-cfos:Gal4ff	13:46570157(+)z9 2637 bp from bsdc1	olfactory bulb, hypothalamus, motor neurons (weak), spinal cord, heart (weak), floorplate	Marquart Front Neural Circuits (2015)
y433Et	cfos:kGal4ff	16:4477730(+)z10 Intron: vegfaa	tegmentum, reticulospinal neurons, fast muscle (strong), pectoral fins	This paper
y436Et	cfos:Gal4ff	n/a	olfactory sensory neurons, retina, lens, posterior tuberculum, pronephric tubules, caudal fin rays, notochord (weak), notochord, muscle, spinal cord	This paper
y441Et	cfos:Gal4ff	12:25705427(-)z10 Intron: epas1a	pineal projection neurons, hypothalamus, vagal ganglion, slow muscle (weak), heart, skin, retina, spinal cord	This paper
y444Et	SCP1:Gal4ff	n/a	pituitary, reticulospinal, notochord, retina, spinal cord	This paper
y467Et	tph2:Gal4ff	n/a	subpallium, hypothalamus - caudal zone, tegmentum, dorsal raphe, Rhombomere 3, Rhombomere 5, endocrine pancreas, motor neurons (weak), heart (weak)	This paper
y468Et	cfos:Gal4ff	n/a	olfactory epithelium, pallium, hypothalamus, cranial sensory ganglia, aLLg, vagal ganglion, intestine, retinal, spinal cord	This paper
y469Et	cfos:Gal4ff	14:281181013(+)z10 Intron: stag2b	retinotectal tract, medulla oblongata (floorplate)	This paper
y470Et	REx2-SCP1:Gal4ff	n/a	pineal complex, subpallium, optic tectum (weak), posterior tuberculum, hypothalamus - caudal zone, anterior macula, middle crista, ocular muscle, integument	This paper
y471Et	REx2-SCP1:Gal4ff	n/a	subpallium, preoptic area, hypothalamus, oculomotor nucleus, interpeduncular nucleus tegmentum, dorsal raphe, medulla oblongata (R1, caudal lateral area), motor neurons, intestine, muscle (weak), iridophores, pectoral fins (strong), medial fin fold (caudal), blood (weak)	This paper
y472Et	REx2-SCP1:Gal4ff	n/a	olfactory epithelium, preoptic area, habenula, hypothalamus, tegmentum, medulla oblongata, intestine	This paper
y473Et	cfos:Gal4ff	n/a	pituitary, tegmentum, medulla oblongata, vagal ganglion, lateral line, otic vesicle cristae, otic vesicle maculae, fast muscle (weak)	This paper
y477Et	cfos:Gal4ff	n/a	statoacoustic ganglion, optic tectum - neuropil, medulla oblongata, fast muscle (weak), retina	This paper
y511Et	cfos:Gal4ff	1:12537737(-)z10 23115 bp from BX323837.1	preoptic area, hypothalamus - rostral zone, radial glia throughout brain, medulla oblongata, fast muscle (moderate), pLLg, pectoral fins	This paper
y512Et	SCP1:Gal4	n/a	optic tract - af9, hypothalamus - rostral zone, locus coeruleus, vagus motor neurons, facial octavolateralis motor neurons, aLLg, pLLg, lateral line, statoacoustic ganglion, heart (weak), muscle, notochord (weak), pectoral fin	This paper
y514Et	REx2-cfos:kGal4ff	n/a	subpallium, hypothalamus - rostral zone, facial sensory ganglion, torus semicircularis, habenula (left), vagal ganglion (and plexus in medulla oblongata), spinal cord	This paper
y515Et	REx2-cfos:kGal4ff	n/a	tegmentum, medulla oblongata (cluster of eng1b cells in ~rhombomere 7)	This paper
y532Et	cfos:Gal4ff	14:35798220(-)z10 Intron: BX511223.1	posterior tuberculum, ventral thalamus, optic tectum (cellular layer), tegmentum, dorsal raphe, horizontal myoseptum, integument (on eye), ocular muscle, fin	This paper
y533Et	SCP1:Gal4ff	1:46264212(-)z10 Intron: TMPRSS3	habenula (right, plus fasciculus retroflexus), floorplate, tegmentum, torus semicircularis, locus coeruleus, facial octavolateralis motor neurons (strong projections outside brain), fast muscle (moderate), projections to neuromasts (hair cell junctions)	This paper
y564Et	SCP1:Gal4ff	7:13657319(+)z10 Intron: slc39a1	posterior tuberculum, trigeminal ganglion, notochord, muscle, retina, spinal cord	This paper
y565Et	REx2-SCP1:Gal4ff	9:24606232(-)z10 4093 bp from tmeff2a	subpallium, medial habenula, thalamus, tegmentum, corpus cerebelli, cranial sensory ganglia, vagus motor neurons, inferior olive, aLLg (strong), pLLg, lateral line (branches to neuromasts), dorsal root ganglia (DRG), notochord (weak), muscle (weak)	This paper
y566Et	REx2-cfos:Gal4ff	9:34974048(+)z10 52835 bp from crlf2	thalamus, optic tectum (cellular layer), torus semicircularis, midbrain region dorsal to raphe, medulla oblongata (caudal region), jaw (basihyal) cartilage, esophagus,vagal ganglion,branchial arches,	This paper
y567Et	REx2-cfos:Gal4ff	n/a	retinal ganglion cells, retinotectal tract (strong), aLLg, pLLg, lateral line (plus innervation of neuromasts), spinal cord, lens (strong)	This paper
y575Et	cfos:Gal4	17:32648393(+)z10 Intron: eva1a	pretectum, pineal, hypothalamus - rostral zone, medulla oblongata, lateral line, pLLg, retina, spinal cord, notochord (weak), integument (weak)	This paper
y576Et	cfos:Gal4	8:14949268(-)z10 233 bp from fnbp1l	pineal, optic tectum, corpus cerebelli, tegmentum, medulla oblongata (lateral domain), endocrine pancreas (weak), retina (strong), fast muscle (weak)	This paper
Supplementary File 2. Summary of ZBB2 Gal4 enhancer trap lines
Coordinate system for mapped lines is either zv9 or zv10 as indicated.
