# Supplementary material for: Brain-wide cellular resolution imaging of Cre transgenic zebrafish lines for functional circuit-mapping
Source: eLife. 2019 Feb 8;8:e42687. doi: 10.7554/eLife.42687 (PMC6392497; doi:10.7554/eLife.42687)
Supplement: Supplementary file 3. — First three columns provide central coordinates of 20 × 20 × 20 µm volumes in the ZBB reference volume (Horizontal plane: distance in microns from the dorsal surface of the volume; Transverse plane: distance from the anterior edge of the volume; Sagittal plane: distance from the left side of the volume). Additional columns indicate the mean expression per bin of each transgene after scaling voxels from 0 to 1.0. [file elife-42687-supp3.xlsx]

## Sheet: Supplementary File 3
Horiz	Trans	Sag	y371-Cre	y378-Cre	y379-Cre	y380-Cre	y381-Cre	y382-Cre	y383-Cre	y384-Cre	y385-Cre	y445-Cre	y456-Cre	y457-Cre	y458-Cre	y459-Cre	y465-Cre	y478-Cre	y479-Cre	y480-Cre	y481-Cre	y483-Cre	y484-Cre	y485-Cre	y486-Cre	y487-Cre	y488-Cre	y489-Cre	y490-Cre	y492-Cre	y493-Cre	y494-Cre	y495-Cre	y519-Cre	y520-Cre	y521-Cre	y523-Cre	y524-Cre	y526-Cre	y528-Cre	y541-Cre	y542-Cre	y543-Cre	y544-Cre	y545-Cre	y546-Cre	y547-Cre	y548-Cre	y549-Cre
230	90	210	0.11	0.034	0.046	0.139	0.085	0.128	0	0.024	0.011	0.107	0.07	0.008	0.176	0.149	0.053	0.448	0.304	0.055	0.141	0.527	0.001	0.023	0.017	0.02	0.016	0.444	0.499	0.412	0.367	0.621	0.711	0.028	0.113	0.76	0.188	0.421	0.453	0.312	0	0.002	0.083	0.001	0	0.057	0.009	0	0
250	90	210	0.107	0.029	0.031	0.113	0.078	0.091	0	0.022	0.01	0.126	0.073	0.016	0.321	0.136	0.054	0.245	0.246	0.21	0.101	0.422	0.002	0.048	0.082	0.029	0.016	0.265	0.343	0.292	0.265	0.45	0.449	0.018	0.112	0.588	0.14	0.337	0.324	0.25	0.001	0	0.057	0	0.01	0.015	0.003	0	0
230	90	230	0.119	0.051	0.029	0.096	0.073	0.122	0	0.018	0.009	0.131	0.067	0.016	0.292	0.136	0.054	0.377	0.219	0.059	0.12	0.671	0.001	0.003	0.034	0.038	0.012	0.253	0.374	0.327	0.283	0.461	0.452	0.028	0.085	0.543	0.151	0.374	0.324	0.242	0	0.004	0.075	0	0.001	0.017	0.009	0	0
250	110	190	0.088	0.024	0.022	0.075	0.063	0.08	0	0.016	0.009	0.109	0.101	0.008	0.341	0.148	0.054	0.211	0.257	0.063	0.08	0.331	0	0.002	0.029	0.055	0.012	0.342	0.255	0.235	0.203	0.332	0.353	0.007	0.064	0.468	0.102	0.255	0.261	0.178	0	0.001	0.034	0	0.001	0.019	0.002	0	0
230	110	210	0.108	0.036	0.031	0.114	0.083	0.135	0	0.026	0.011	0.097	0.064	0.008	0.186	0.129	0.048	0.328	0.268	0.051	0.11	0.474	0.001	0.004	0.022	0.03	0.017	0.826	0.41	0.368	0.304	0.483	0.53	0.028	0.084	0.596	0.169	0.363	0.375	0.253	0	0.006	0.058	0	0	0.044	0.007	0	0
210	110	230	0.134	0.074	0.033	0.132	0.091	0.156	0.001	0.019	0.018	0.131	0.083	0.011	0.297	0.156	0.067	0.381	0.295	0.061	0.118	1	0.001	0.003	0.027	0.009	0.02	0.84	0.506	0.485	0.369	0.587	0.499	0.034	0.083	0.614	0.219	0.512	0.403	0.288	0	0.009	0.15	0	0.027	0.058	0.017	0	0
230	110	230	0.097	0.05	0.021	0.079	0.062	0.098	0.001	0.019	0.012	0.091	0.044	0.018	0.212	0.102	0.039	0.236	0.238	0.061	0.07	0.489	0.001	0.001	0.03	0.035	0.015	0.373	0.301	0.279	0.208	0.351	0.302	0.02	0.06	0.398	0.132	0.29	0.248	0.184	0	0.007	0.06	0	0.001	0.014	0.011	0	0
230	130	190	0.11	0.043	0.03	0.091	0.11	0.099	0	0.025	0.014	0.123	0.078	0.011	0.297	0.203	0.078	0.258	0.256	0.086	0.092	0.373	0.001	0.003	0.057	0.054	0.013	0.773	0.355	0.336	0.264	0.397	0.411	0.02	0.065	0.438	0.159	0.354	0.305	0.208	0.002	0.006	0.052	0	0.001	0.035	0.008	0	0
230	130	210	0.081	0.023	0.019	0.075	0.058	0.075	0	0.021	0.01	0.091	0.062	0.009	0.207	0.115	0.039	0.248	0.26	0.05	0.067	0.378	0.001	0.001	0.028	0.053	0.012	0.502	0.281	0.269	0.193	0.319	0.289	0.012	0.051	0.354	0.127	0.265	0.239	0.158	0	0.007	0.046	0.001	0.001	0.025	0.007	0	0
210	130	230	0.104	0.047	0.027	0.108	0.071	0.128	0.001	0.021	0.013	0.092	0.059	0.015	0.21	0.125	0.036	0.331	0.352	0.109	0.114	0.675	0.002	0.002	0.038	0.012	0.025	0.751	0.405	0.344	0.24	0.43	0.339	0.029	0.066	0.442	0.164	0.363	0.307	0.209	0.001	0.017	0.195	0.001	0.008	0.056	0.019	0	0
230	130	230	0.075	0.027	0.016	0.06	0.051	0.065	0.001	0.019	0.009	0.066	0.04	0.023	0.149	0.089	0.024	0.219	0.247	0.066	0.06	0.335	0.002	0.001	0.037	0.021	0.011	0.204	0.225	0.198	0.136	0.266	0.187	0.01	0.041	0.288	0.111	0.212	0.194	0.129	0	0.01	0.058	0.001	0.001	0.008	0.005	0	0
210	130	250	0.109	0.328	0.035	0.113	0.078	0.182	0.001	0.029	0.053	0.219	0.122	0.098	0.326	0.289	0.073	0.492	0.517	0.128	0.112	0.621	0.027	0.003	0.044	0.034	0.031	0.429	0.459	0.425	0.301	0.486	0.393	0.04	0.11	0.498	0.191	0.423	0.394	0.252	0.007	0.026	0.115	0.003	0.019	0.302	0.039	0.028	0
230	130	250	0.085	0.178	0.022	0.078	0.066	0.077	0.001	0.023	0.045	0.135	0.088	0.066	0.315	0.22	0.051	0.345	0.229	0.088	0.085	0.305	0.006	0.004	0.036	0.121	0.016	0.087	0.285	0.273	0.211	0.354	0.253	0.014	0.058	0.372	0.137	0.276	0.269	0.166	0.003	0.017	0.064	0.001	0.002	0.094	0.027	0	0
190	130	270	0.166	0.782	0.077	0.169	0.109	0.185	0.009	0.03	0.184	0.305	0.149	0.227	0.417	0.251	0.097	0.547	0.732	0.122	0.185	0.698	0.073	0.019	0.046	0.013	0.1	0.128	0.732	0.69	0.518	0.72	0.679	0.092	0.241	0.71	0.282	0.689	0.651	0.387	0.019	0.015	0.092	0.011	0.003	0.704	0.055	0.157	0.001
210	130	270	0.127	0.731	0.052	0.147	0.097	0.233	0.005	0.035	0.152	0.225	0.136	0.124	0.389	0.277	0.094	0.695	0.641	0.091	0.162	0.653	0.062	0.004	0.045	0.018	0.045	0.117	0.572	0.598	0.432	0.655	0.551	0.056	0.213	0.649	0.251	0.583	0.554	0.32	0.013	0.02	0.085	0.008	0.002	0.565	0.022	0.038	0.003
230	130	270	0.082	0.569	0.031	0.093	0.07	0.114	0.004	0.029	0.138	0.165	0.121	0.043	0.343	0.229	0.062	0.604	0.258	0.083	0.11	0.602	0.008	0.002	0.038	0.073	0.017	0.055	0.377	0.372	0.293	0.441	0.302	0.017	0.081	0.455	0.166	0.354	0.333	0.205	0.002	0.01	0.086	0.002	0.002	0.33	0.053	0	0
190	130	290	0.156	0.875	0.065	0.175	0.129	0.393	0.006	0.048	0.235	0.227	0.118	0.2	0.342	0.195	0.062	0.656	0.751	0.117	0.2	0.69	0.046	0.021	0.036	0.011	0.127	0.096	0.706	0.716	0.519	0.818	0.668	0.101	0.211	0.798	0.285	0.7	0.645	0.368	0.044	0.019	0.09	0.018	0.004	0.726	0.021	0.086	0.003
210	130	290	0.107	0.761	0.039	0.122	0.097	0.305	0.005	0.04	0.181	0.178	0.126	0.057	0.308	0.222	0.073	0.61	0.458	0.077	0.138	0.621	0.015	0.006	0.03	0.012	0.026	0.055	0.489	0.533	0.372	0.58	0.43	0.042	0.127	0.602	0.217	0.499	0.438	0.293	0.008	0.018	0.095	0.005	0.005	0.524	0.052	0.02	0.003
230	130	290	0.06	0.528	0.025	0.076	0.047	0.079	0.003	0.02	0.102	0.108	0.113	0.021	0.216	0.176	0.043	0.779	0.145	0.066	0.077	0.444	0.002	0.001	0.031	0.009	0.01	0.042	0.291	0.341	0.233	0.377	0.237	0.013	0.061	0.373	0.139	0.314	0.291	0.207	0.001	0.01	0.103	0.001	0.003	0.311	0.147	0.001	0.003
190	150	210	0.11	0.029	0.042	0.12	0.072	0.119	0.001	0.035	0.012	0.13	0.067	0.018	0.284	0.133	0.06	0.309	0.479	0.067	0.127	0.564	0.002	0.007	0.037	0.051	0.017	1	0.453	0.43	0.383	0.548	0.406	0.079	0.078	0.439	0.182	0.449	0.349	0.247	0.004	0.009	0.209	0.004	0.202	0.078	0.01	0.008	0.001
190	150	230	0.137	0.116	0.037	0.113	0.089	0.202	0.007	0.039	0.043	0.179	0.083	0.163	0.232	0.146	0.06	0.335	0.521	0.205	0.122	0.47	0.017	0.078	0.048	0.031	0.154	0.531	0.442	0.418	0.322	0.517	0.381	0.117	0.092	0.416	0.178	0.41	0.373	0.216	0.014	0.061	0.175	0.002	0.114	0.155	0.062	0.016	0.004
190	150	250	0.143	0.615	0.077	0.187	0.122	0.395	0.018	0.046	0.245	0.284	0.141	0.307	0.357	0.235	0.065	0.507	0.786	0.101	0.21	0.528	0.122	0.065	0.048	0.016	0.28	0.127	0.739	0.678	0.5	0.754	0.635	0.104	0.245	0.703	0.298	0.697	0.648	0.378	0.025	0.025	0.089	0.008	0.006	0.612	0.029	0.211	0.008
210	150	250	0.108	0.523	0.062	0.151	0.096	0.212	0.008	0.038	0.183	0.233	0.155	0.146	0.393	0.356	0.092	0.511	0.599	0.104	0.154	0.58	0.054	0.021	0.039	0.037	0.112	0.073	0.539	0.52	0.382	0.601	0.465	0.057	0.148	0.576	0.218	0.515	0.484	0.283	0.01	0.018	0.076	0.003	0.006	0.498	0.047	0.055	0.003
170	150	270	0.201	0.854	0.097	0.224	0.144	0.21	0.024	0.038	0.355	0.261	0.108	0.367	0.302	0.159	0.066	0.551	0.724	0.121	0.235	0.594	0.212	0.062	0.057	0.016	0.277	0.089	0.933	0.78	0.606	0.87	0.766	0.182	0.375	0.781	0.344	0.868	0.789	0.434	0.059	0.022	0.068	0.024	0.004	0.813	0.088	0.112	0.009
190	150	270	0.137	0.954	0.1	0.191	0.104	0.186	0.026	0.042	0.301	0.23	0.118	0.228	0.315	0.203	0.068	0.502	0.747	0.093	0.216	0.555	0.247	0.014	0.049	0.017	0.102	0.068	0.733	0.651	0.498	0.744	0.661	0.112	0.382	0.701	0.282	0.718	0.64	0.39	0.029	0.019	0.1	0.021	0.002	0.745	0.063	0.255	0
210	150	270	0.118	0.836	0.082	0.15	0.096	0.125	0.007	0.032	0.2	0.186	0.133	0.118	0.336	0.27	0.077	0.567	0.564	0.095	0.166	0.595	0.098	0.004	0.042	0.013	0.041	0.064	0.572	0.568	0.416	0.644	0.534	0.087	0.211	0.631	0.246	0.558	0.526	0.329	0.013	0.022	0.1	0.012	0.004	0.625	0.18	0.117	0
230	150	270	0.075	0.709	0.1	0.103	0.059	0.071	0.001	0.022	0.087	0.154	0.136	0.038	0.326	0.239	0.06	0.544	0.202	0.086	0.104	0.6	0.005	0.002	0.033	0.013	0.013	0.042	0.387	0.382	0.29	0.506	0.338	0.022	0.073	0.476	0.175	0.389	0.365	0.278	0.001	0.014	0.131	0.001	0.001	0.439	0.226	0.005	0.001
170	150	290	0.211	0.981	0.068	0.191	0.16	0.143	0.012	0.033	0.378	0.161	0.082	0.258	0.233	0.115	0.04	0.516	0.611	0.195	0.244	0.64	0.153	0.018	0.052	0.016	0.129	0.135	0.827	0.774	0.573	0.868	0.703	0.164	0.325	0.777	0.31	0.807	0.734	0.45	0.104	0.031	0.099	0.021	0.008	0.86	0.102	0.184	0
190	150	290	0.117	1	0.065	0.145	0.089	0.108	0.022	0.035	0.297	0.175	0.104	0.122	0.26	0.168	0.049	0.547	0.545	0.112	0.223	0.541	0.185	0.004	0.04	0.01	0.045	0.055	0.612	0.583	0.423	0.651	0.506	0.074	0.303	0.637	0.234	0.567	0.522	0.383	0.024	0.019	0.147	0.035	0.014	0.662	0.183	0.128	0.001
210	150	290	0.082	0.768	0.065	0.114	0.069	0.06	0.004	0.018	0.141	0.152	0.148	0.059	0.303	0.244	0.061	0.555	0.387	0.087	0.132	0.536	0.039	0.003	0.035	0.011	0.015	0.046	0.431	0.455	0.305	0.51	0.377	0.036	0.14	0.51	0.176	0.429	0.383	0.295	0.006	0.014	0.154	0.005	0.008	0.507	0.504	0.019	0.001
230	150	290	0.063	0.664	0.042	0.101	0.051	0.056	0.001	0.017	0.08	0.146	0.164	0.028	0.341	0.274	0.06	1	0.268	0.098	0.101	0.734	0.002	0.002	0.035	0.008	0.011	0.052	0.356	0.394	0.271	0.468	0.348	0.025	0.075	0.495	0.177	0.391	0.383	0.285	0.002	0.018	0.156	0.001	0.012	0.472	0.568	0.012	0.005
250	150	290	0.056	0.632	0.026	0.085	0.047	0.051	0.002	0.014	0.084	0.125	0.138	0.019	0.337	0.187	0.049	0.827	0.144	0.079	0.09	0.652	0.002	0.002	0.039	0.014	0.015	0.048	0.289	0.323	0.231	0.412	0.297	0.019	0.064	0.468	0.123	0.331	0.34	0.194	0.001	0.008	0.098	0.001	0.007	0.341	0.263	0	0.003
170	170	250	0.185	0.714	0.077	0.313	0.124	0.513	0.026	0.041	0.452	0.234	0.12	0.528	0.349	0.119	0.045	0.523	0.768	0.144	0.197	0.474	0.22	0.135	0.116	0.017	0.373	0.104	0.828	0.706	0.52	0.819	0.663	0.123	0.283	0.774	0.311	0.801	0.724	0.432	0.226	0.017	0.029	0.007	0.002	0.758	0.058	0.422	0.026
190	170	250	0.138	0.693	0.096	0.213	0.11	0.255	0.043	0.039	0.309	0.226	0.121	0.337	0.332	0.181	0.06	0.497	0.744	0.155	0.182	0.478	0.168	0.068	0.097	0.017	0.264	0.086	0.668	0.603	0.43	0.712	0.564	0.067	0.272	0.666	0.258	0.64	0.594	0.353	0.039	0.02	0.047	0.007	0.002	0.624	0.094	0.193	0.012
210	170	250	0.117	0.621	0.091	0.151	0.093	0.139	0.018	0.032	0.175	0.169	0.119	0.159	0.333	0.24	0.064	0.485	0.48	0.112	0.13	0.495	0.053	0.019	0.053	0.018	0.106	0.075	0.5	0.476	0.341	0.596	0.426	0.061	0.143	0.558	0.213	0.482	0.43	0.28	0.008	0.016	0.061	0.001	0.013	0.47	0.081	0.021	0.001
150	170	270	0.208	0.825	0.061	0.357	0.138	0.465	0.027	0.03	0.55	0.187	0.094	0.656	0.296	0.073	0.035	0.509	0.761	0.149	0.196	0.455	0.215	0.098	0.079	0.024	0.5	0.188	0.902	0.798	0.548	0.936	0.707	0.167	0.265	0.794	0.344	0.88	0.806	0.425	0.491	0.019	0.041	0.001	0.002	0.929	0.026	0.251	0.028
170	170	270	0.159	0.818	0.106	0.287	0.112	0.248	0.05	0.039	0.361	0.205	0.107	0.34	0.304	0.131	0.044	0.548	0.739	0.105	0.203	0.465	0.293	0.022	0.05	0.016	0.159	0.064	0.801	0.768	0.514	0.807	0.651	0.097	0.465	0.761	0.306	0.768	0.694	0.417	0.18	0.025	0.078	0.03	0.002	0.807	0.074	0.277	0.001
190	170	270	0.125	0.908	0.125	0.183	0.099	0.125	0.039	0.04	0.274	0.223	0.136	0.191	0.31	0.23	0.061	0.521	0.68	0.102	0.175	0.535	0.159	0.013	0.065	0.019	0.069	0.054	0.639	0.612	0.43	0.693	0.558	0.059	0.286	0.675	0.268	0.646	0.571	0.382	0.019	0.019	0.093	0.016	0.009	0.679	0.118	0.122	0
210	170	270	0.105	0.852	0.147	0.143	0.077	0.077	0.003	0.024	0.127	0.202	0.153	0.094	0.352	0.324	0.071	0.469	0.365	0.091	0.132	0.529	0.032	0.004	0.038	0.01	0.028	0.05	0.517	0.502	0.351	0.615	0.463	0.051	0.135	0.588	0.2	0.505	0.469	0.306	0.005	0.017	0.107	0.001	0.017	0.532	0.234	0.034	0.001
230	170	270	0.072	0.709	0.115	0.108	0.065	0.065	0.004	0.022	0.046	0.144	0.129	0.07	0.319	0.271	0.053	0.437	0.238	0.084	0.096	0.551	0.003	0.003	0.038	0.01	0.024	0.049	0.372	0.381	0.273	0.492	0.363	0.036	0.068	0.467	0.169	0.364	0.37	0.232	0.001	0.015	0.094	0.001	0.008	0.399	0.193	0.015	0
250	170	270	0.057	0.581	0.044	0.081	0.054	0.065	0.003	0.023	0.055	0.104	0.105	0.049	0.273	0.202	0.038	0.418	0.201	0.072	0.074	0.46	0.002	0.003	0.033	0.012	0.031	0.044	0.269	0.279	0.205	0.378	0.267	0.024	0.051	0.396	0.109	0.279	0.294	0.17	0.001	0.008	0.073	0.001	0.002	0.3	0.144	0.022	0
150	170	290	0.191	0.746	0.054	0.263	0.124	0.171	0.018	0.032	0.452	0.103	0.064	0.532	0.199	0.061	0.033	0.429	0.519	0.135	0.171	0.386	0.096	0.049	0.066	0.019	0.269	0.319	0.759	0.651	0.456	0.804	0.582	0.153	0.258	0.661	0.279	0.689	0.645	0.363	0.589	0.023	0.046	0.002	0.017	0.897	0.03	0.55	0.002
170	170	290	0.13	0.911	0.101	0.202	0.11	0.1	0.024	0.031	0.291	0.155	0.113	0.227	0.29	0.149	0.047	0.555	0.59	0.118	0.194	0.593	0.156	0.005	0.062	0.011	0.043	0.068	0.699	0.633	0.457	0.75	0.553	0.082	0.386	0.662	0.27	0.616	0.593	0.409	0.087	0.019	0.119	0.018	0.012	0.766	0.222	0.175	0
190	170	290	0.095	0.911	0.137	0.141	0.076	0.063	0.02	0.029	0.224	0.2	0.149	0.106	0.32	0.26	0.063	0.518	0.527	0.093	0.136	0.577	0.046	0.004	0.038	0.012	0.014	0.049	0.548	0.524	0.368	0.601	0.448	0.036	0.168	0.587	0.203	0.478	0.456	0.343	0.007	0.016	0.169	0.003	0.01	0.622	0.582	0.046	0
210	170	290	0.087	0.799	0.148	0.128	0.066	0.059	0.007	0.02	0.084	0.183	0.174	0.071	0.36	0.334	0.069	0.497	0.505	0.101	0.118	0.494	0.004	0.002	0.045	0.011	0.012	0.058	0.456	0.466	0.314	0.534	0.425	0.049	0.084	0.548	0.183	0.43	0.418	0.303	0.002	0.017	0.125	0.001	0.004	0.558	1	0.055	0
230	170	290	0.068	0.763	0.056	0.112	0.062	0.06	0.002	0.02	0.037	0.139	0.149	0.048	0.341	0.312	0.058	0.566	0.304	0.093	0.105	0.552	0.002	0.003	0.04	0.01	0.021	0.05	0.381	0.394	0.286	0.499	0.404	0.054	0.073	0.514	0.186	0.381	0.405	0.251	0.002	0.02	0.092	0.001	0.009	0.426	0.552	0.045	0
250	170	290	0.06	0.643	0.028	0.091	0.057	0.056	0.002	0.018	0.045	0.108	0.125	0.037	0.31	0.219	0.043	0.5	0.209	0.077	0.087	0.559	0.002	0.002	0.034	0.009	0.022	0.048	0.295	0.323	0.236	0.423	0.326	0.039	0.06	0.463	0.126	0.318	0.344	0.187	0.001	0.011	0.072	0.001	0.003	0.329	0.23	0.007	0
270	170	290	0.048	0.463	0.022	0.064	0.069	0.04	0.001	0.008	0.038	0.084	0.099	0.034	0.265	0.164	0.03	0.263	0.165	0.097	0.063	0.345	0.002	0.004	0.026	0.011	0.03	0.047	0.211	0.242	0.179	0.305	0.229	0.025	0.048	0.385	0.094	0.214	0.269	0.144	0.001	0.002	0.045	0	0.001	0.157	0.104	0	0
150	190	250	0.223	0.815	0.054	0.677	0.242	1	0.007	0.037	0.768	0.304	0.115	0.759	0.359	0.108	0.047	0.461	0.883	0.17	0.193	0.531	0.65	0.249	0.189	0.022	0.711	0.277	0.895	0.778	0.592	0.907	0.742	0.06	0.302	0.847	0.343	0.881	0.781	0.473	0.43	0.021	0.013	0.001	0.002	0.91	0.058	0.067	0
170	190	250	0.174	0.682	0.061	0.592	0.142	0.806	0.016	0.044	0.514	0.359	0.168	0.563	0.439	0.188	0.069	0.452	0.765	0.188	0.164	0.465	0.432	0.057	0.067	0.018	0.373	0.227	0.749	0.672	0.513	0.779	0.662	0.077	0.278	0.766	0.285	0.711	0.65	0.402	0.323	0.021	0.016	0.001	0.002	0.807	0.124	0.418	0
190	190	250	0.14	0.663	0.09	0.348	0.116	0.411	0.021	0.047	0.338	0.253	0.151	0.364	0.399	0.221	0.065	0.441	0.676	0.106	0.13	0.45	0.228	0.052	0.061	0.027	0.232	0.074	0.57	0.515	0.384	0.616	0.504	0.068	0.193	0.611	0.223	0.535	0.488	0.304	0.078	0.024	0.045	0.001	0.013	0.626	0.187	0.163	0
210	190	250	0.117	0.605	0.076	0.219	0.094	0.257	0.015	0.039	0.244	0.168	0.128	0.25	0.331	0.245	0.056	0.38	0.553	0.095	0.104	0.388	0.096	0.035	0.055	0.022	0.159	0.061	0.417	0.422	0.292	0.487	0.391	0.052	0.117	0.495	0.171	0.4	0.385	0.234	0.024	0.017	0.05	0.001	0.01	0.494	0.133	0.035	0
230	190	250	0.092	0.485	0.055	0.169	0.075	0.217	0.009	0.033	0.185	0.126	0.109	0.188	0.276	0.228	0.047	0.292	0.442	0.079	0.082	0.294	0.06	0.02	0.045	0.018	0.131	0.057	0.31	0.325	0.224	0.393	0.29	0.028	0.083	0.402	0.147	0.31	0.306	0.182	0.021	0.015	0.039	0.001	0.002	0.392	0.147	0.011	0
130	190	270	0.217	0.707	0.059	0.738	0.133	0.682	0.011	0.028	0.71	0.205	0.097	0.816	0.324	0.071	0.029	0.46	0.743	0.145	0.203	0.557	0.633	0.293	0.196	0.04	0.749	0.175	0.922	0.8	0.623	0.964	0.78	0.048	0.309	0.827	0.358	0.929	0.816	0.525	0.568	0.014	0.006	0.001	0.001	0.925	0.053	0.04	0.002
150	190	270	0.199	0.765	0.058	0.784	0.153	0.758	0.027	0.057	0.711	0.367	0.12	0.76	0.43	0.123	0.045	0.437	0.859	0.177	0.185	0.521	0.54	0.078	0.07	0.027	0.495	0.273	0.855	0.755	0.568	0.945	0.755	0.066	0.371	0.839	0.332	0.826	0.764	0.464	0.565	0.02	0.022	0.001	0.002	0.97	0.095	0.413	0
170	190	270	0.161	0.745	0.125	0.5	0.128	0.468	0.035	0.056	0.414	0.304	0.151	0.457	0.405	0.186	0.064	0.461	0.791	0.151	0.153	0.489	0.262	0.017	0.048	0.032	0.187	0.08	0.703	0.667	0.489	0.77	0.654	0.105	0.324	0.734	0.271	0.675	0.648	0.391	0.189	0.023	0.051	0.001	0.002	0.794	0.171	0.466	0
190	190	270	0.124	0.725	0.114	0.212	0.118	0.169	0.035	0.038	0.218	0.219	0.154	0.259	0.343	0.26	0.07	0.496	0.619	0.11	0.127	0.474	0.072	0.019	0.062	0.036	0.099	0.066	0.568	0.532	0.39	0.643	0.536	0.105	0.177	0.626	0.22	0.528	0.495	0.312	0.014	0.024	0.045	0.002	0.028	0.588	0.124	0.27	0
210	190	270	0.115	0.622	0.131	0.146	0.103	0.112	0.025	0.03	0.138	0.162	0.142	0.17	0.33	0.284	0.066	0.433	0.466	0.098	0.106	0.425	0.015	0.011	0.052	0.019	0.081	0.062	0.423	0.432	0.308	0.532	0.421	0.078	0.09	0.519	0.167	0.415	0.397	0.254	0.002	0.019	0.055	0.001	0.02	0.467	0.133	0.034	0
230	190	270	0.09	0.506	0.066	0.124	0.088	0.104	0.022	0.031	0.078	0.128	0.121	0.141	0.295	0.278	0.05	0.382	0.375	0.089	0.086	0.377	0.009	0.008	0.044	0.018	0.072	0.055	0.324	0.344	0.242	0.429	0.323	0.044	0.067	0.422	0.15	0.327	0.324	0.195	0.002	0.016	0.05	0.001	0.007	0.366	0.145	0.007	0
250	190	270	0.075	0.437	0.039	0.116	0.074	0.153	0.005	0.034	0.105	0.106	0.108	0.133	0.256	0.237	0.041	0.286	0.378	0.076	0.072	0.288	0.027	0.017	0.034	0.014	0.095	0.052	0.245	0.275	0.195	0.352	0.241	0.024	0.064	0.375	0.121	0.266	0.268	0.16	0.01	0.013	0.038	0.001	0.001	0.332	0.137	0.001	0
130	190	290	0.209	0.713	0.054	0.532	0.133	0.386	0.019	0.049	0.597	0.113	0.077	0.749	0.242	0.057	0.024	0.354	0.669	0.268	0.182	0.427	0.387	0.128	0.071	0.031	0.54	0.367	0.791	0.708	0.568	0.842	0.647	0.052	0.378	0.734	0.31	0.745	0.644	0.413	0.692	0.019	0.008	0.001	0.003	0.998	0.061	0.416	0
150	190	290	0.151	0.82	0.079	0.62	0.128	0.465	0.026	0.089	0.605	0.187	0.101	0.659	0.342	0.093	0.037	0.427	0.868	0.102	0.175	0.455	0.331	0.016	0.056	0.039	0.249	0.136	0.784	0.654	0.528	0.84	0.666	0.05	0.465	0.768	0.291	0.679	0.638	0.395	0.576	0.026	0.038	0.001	0.006	1	0.131	1	0
170	190	290	0.118	0.957	0.18	0.266	0.104	0.169	0.009	0.028	0.277	0.212	0.153	0.245	0.329	0.196	0.065	0.651	0.685	0.094	0.134	0.538	0.048	0.004	0.077	0.015	0.059	0.057	0.63	0.552	0.417	0.685	0.531	0.073	0.173	0.644	0.225	0.52	0.513	0.302	0.057	0.021	0.098	0.001	0.026	0.755	0.282	0.279	0.001
190	190	290	0.102	0.748	0.241	0.153	0.104	0.072	0.03	0.027	0.123	0.209	0.165	0.139	0.324	0.305	0.079	0.531	0.58	0.16	0.12	0.441	0.007	0.003	0.043	0.02	0.025	0.058	0.516	0.489	0.348	0.616	0.479	0.094	0.11	0.573	0.189	0.442	0.427	0.282	0.004	0.022	0.069	0.002	0.014	0.574	0.54	0.191	0
210	190	290	0.091	0.592	0.148	0.138	0.091	0.082	0.027	0.024	0.06	0.15	0.148	0.14	0.312	0.305	0.073	0.456	0.505	0.105	0.102	0.384	0.004	0.006	0.052	0.019	0.053	0.065	0.416	0.419	0.3	0.527	0.418	0.093	0.079	0.511	0.169	0.392	0.39	0.273	0.002	0.021	0.057	0.001	0.003	0.446	0.624	0.073	0.001
230	190	290	0.082	0.495	0.052	0.115	0.086	0.097	0.021	0.031	0.075	0.124	0.128	0.148	0.29	0.284	0.055	0.384	0.429	0.083	0.088	0.363	0.004	0.01	0.049	0.015	0.071	0.057	0.327	0.347	0.249	0.452	0.347	0.065	0.068	0.439	0.159	0.325	0.332	0.197	0.001	0.016	0.049	0.001	0.006	0.372	0.328	0.01	0
250	190	290	0.072	0.429	0.036	0.117	0.074	0.138	0.007	0.036	0.096	0.104	0.114	0.141	0.259	0.259	0.046	0.288	0.393	0.071	0.073	0.311	0.012	0.018	0.038	0.013	0.092	0.052	0.251	0.274	0.199	0.367	0.257	0.031	0.06	0.383	0.118	0.27	0.277	0.161	0.006	0.012	0.039	0.001	0.004	0.324	0.169	0.001	0
270	190	290	0.06	0.355	0.025	0.073	0.078	0.103	0.003	0.03	0.116	0.084	0.1	0.107	0.227	0.201	0.034	0.179	0.305	0.09	0.059	0.208	0.024	0.006	0.026	0.016	0.082	0.047	0.188	0.22	0.159	0.28	0.184	0.014	0.046	0.334	0.096	0.214	0.221	0.127	0.006	0.004	0.03	0	0.001	0.208	0.119	0	0
150	210	230	0.165	0.542	0.05	0.424	0.114	0.849	0.012	0.03	0.572	0.248	0.089	0.589	0.266	0.102	0.039	0.394	0.834	0.155	0.161	0.463	0.52	0.344	0.09	0.028	0.628	0.08	0.719	0.63	0.508	0.697	0.616	0.083	0.219	0.656	0.274	0.673	0.553	0.352	0.137	0.015	0.008	0.001	0.001	0.593	0.039	0.096	0
170	210	230	0.144	0.48	0.044	0.337	0.11	0.638	0.014	0.034	0.38	0.239	0.106	0.453	0.283	0.155	0.053	0.313	0.69	0.108	0.126	0.359	0.292	0.201	0.075	0.032	0.42	0.082	0.542	0.495	0.382	0.545	0.475	0.07	0.193	0.529	0.206	0.505	0.435	0.28	0.098	0.017	0.013	0.001	0.002	0.546	0.047	0.148	0
130	210	250	0.245	0.663	0.056	0.811	0.177	0.996	0.011	0.032	0.881	0.258	0.086	0.837	0.335	0.08	0.032	0.504	0.858	0.137	0.206	0.562	0.979	0.446	0.259	0.028	0.858	0.08	0.982	0.952	0.704	0.967	0.806	0.067	0.417	0.916	0.368	1	0.829	0.515	0.323	0.017	0.005	0.001	0.002	0.769	0.038	0.057	0.002
150	210	250	0.236	0.561	0.052	0.853	0.177	0.892	0.017	0.045	0.817	0.344	0.109	0.692	0.349	0.138	0.05	0.435	0.863	0.149	0.179	0.469	0.754	0.219	0.069	0.03	0.616	0.096	0.816	0.751	0.596	0.836	0.718	0.084	0.355	0.825	0.329	0.803	0.721	0.433	0.223	0.026	0.007	0.001	0.003	0.762	0.063	0.172	0
170	210	250	0.194	0.528	0.053	0.542	0.155	0.698	0.02	0.05	0.552	0.28	0.125	0.551	0.342	0.203	0.058	0.382	0.786	0.125	0.15	0.413	0.444	0.136	0.074	0.043	0.422	0.084	0.671	0.603	0.472	0.691	0.595	0.088	0.305	0.697	0.252	0.626	0.58	0.348	0.097	0.026	0.014	0.001	0.008	0.665	0.084	0.447	0
190	210	250	0.158	0.564	0.058	0.273	0.111	0.411	0.025	0.05	0.375	0.199	0.12	0.381	0.322	0.227	0.059	0.369	0.686	0.111	0.117	0.368	0.184	0.11	0.068	0.047	0.309	0.071	0.503	0.457	0.35	0.556	0.45	0.075	0.176	0.542	0.191	0.469	0.43	0.256	0.03	0.023	0.026	0.001	0.005	0.545	0.099	0.156	0
210	210	250	0.128	0.488	0.06	0.237	0.096	0.279	0.03	0.049	0.275	0.152	0.113	0.294	0.294	0.241	0.056	0.299	0.588	0.097	0.094	0.285	0.106	0.069	0.059	0.037	0.237	0.065	0.384	0.38	0.268	0.444	0.344	0.05	0.12	0.449	0.147	0.366	0.344	0.208	0.019	0.022	0.026	0.001	0.003	0.435	0.133	0.053	0
230	210	250	0.098	0.364	0.038	0.222	0.08	0.22	0.015	0.061	0.256	0.12	0.105	0.252	0.273	0.24	0.047	0.218	0.511	0.081	0.079	0.212	0.113	0.035	0.044	0.025	0.204	0.059	0.3	0.31	0.221	0.373	0.265	0.024	0.11	0.39	0.142	0.306	0.29	0.174	0.029	0.018	0.025	0.001	0.002	0.386	0.115	0.009	0
130	210	270	0.253	0.581	0.056	0.939	0.169	0.811	0.016	0.044	1	0.314	0.105	0.872	0.377	0.101	0.04	0.475	0.822	0.15	0.198	0.547	0.959	0.334	0.061	0.032	0.755	0.2	0.96	0.93	0.651	1	0.815	0.066	0.516	0.956	0.386	0.986	0.861	0.539	0.49	0.022	0.009	0.001	0.003	0.926	0.039	0.234	0
150	210	270	0.219	0.461	0.053	1	0.148	0.712	0.036	0.063	0.767	0.368	0.111	0.697	0.368	0.157	0.048	0.397	0.84	0.131	0.161	0.451	0.702	0.136	0.058	0.054	0.506	0.154	0.771	0.716	0.546	0.818	0.683	0.075	0.46	0.817	0.297	0.76	0.711	0.421	0.292	0.022	0.014	0.001	0.002	0.814	0.056	0.557	0.001
170	210	270	0.176	0.543	0.075	0.511	0.131	0.505	0.071	0.053	0.493	0.251	0.121	0.504	0.321	0.19	0.055	0.386	0.776	0.111	0.132	0.388	0.364	0.078	0.06	0.078	0.283	0.08	0.615	0.569	0.443	0.684	0.563	0.107	0.328	0.677	0.233	0.597	0.558	0.33	0.084	0.025	0.021	0.001	0.012	0.65	0.119	0.555	0
190	210	270	0.146	0.577	0.081	0.204	0.125	0.241	0.066	0.046	0.283	0.172	0.124	0.341	0.3	0.237	0.061	0.365	0.646	0.112	0.108	0.377	0.09	0.047	0.065	0.058	0.213	0.067	0.477	0.452	0.343	0.561	0.45	0.1	0.162	0.541	0.178	0.453	0.419	0.245	0.011	0.026	0.034	0.001	0.01	0.562	0.151	0.253	0
210	210	270	0.14	0.504	0.066	0.142	0.114	0.224	0.042	0.048	0.204	0.145	0.125	0.263	0.283	0.269	0.062	0.305	0.583	0.092	0.093	0.311	0.02	0.037	0.06	0.033	0.203	0.062	0.375	0.382	0.274	0.462	0.358	0.066	0.086	0.451	0.146	0.373	0.334	0.206	0.004	0.021	0.031	0.001	0.003	0.457	0.107	0.08	0
230	210	270	0.11	0.373	0.048	0.143	0.095	0.137	0.034	0.057	0.14	0.115	0.11	0.207	0.265	0.293	0.049	0.238	0.451	0.084	0.077	0.24	0.017	0.018	0.041	0.023	0.142	0.056	0.287	0.307	0.217	0.376	0.271	0.038	0.07	0.377	0.133	0.302	0.281	0.168	0.004	0.019	0.03	0.001	0.002	0.34	0.129	0.009	0
250	210	270	0.083	0.281	0.028	0.107	0.083	0.099	0.01	0.072	0.154	0.093	0.094	0.162	0.228	0.252	0.039	0.177	0.406	0.08	0.063	0.182	0.023	0.019	0.028	0.014	0.134	0.045	0.228	0.247	0.172	0.308	0.211	0.022	0.055	0.332	0.119	0.247	0.229	0.141	0.006	0.014	0.023	0.001	0.001	0.275	0.096	0.005	0
270	210	270	0.055	0.185	0.017	0.06	0.068	0.034	0.003	0.056	0.121	0.068	0.073	0.107	0.175	0.173	0.025	0.107	0.278	0.076	0.047	0.126	0.007	0.034	0.016	0.01	0.091	0.032	0.161	0.189	0.125	0.219	0.148	0.01	0.034	0.27	0.071	0.176	0.169	0.103	0.001	0.002	0.01	0	0	0.161	0.048	0.004	0
130	210	290	0.191	0.507	0.052	0.922	0.136	0.586	0.05	0.072	0.904	0.167	0.091	0.863	0.317	0.077	0.032	0.366	0.822	0.15	0.179	0.429	0.659	0.207	0.061	0.055	0.544	0.447	0.85	0.767	0.599	0.9	0.7	0.06	0.508	0.826	0.322	0.747	0.659	0.441	0.579	0.022	0.015	0.001	0.003	0.969	0.071	0.566	0
150	210	290	0.169	0.575	0.078	0.807	0.133	0.475	0.022	0.089	0.632	0.191	0.088	0.625	0.31	0.113	0.036	0.334	0.898	0.299	0.143	0.386	0.487	0.05	0.056	0.12	0.32	0.142	0.672	0.572	0.482	0.736	0.585	0.069	0.472	0.708	0.34	0.599	0.563	0.385	0.336	0.025	0.037	0.001	0.003	0.847	0.087	0.759	0
170	210	290	0.13	0.633	0.166	0.279	0.105	0.193	0.109	0.037	0.274	0.178	0.118	0.313	0.265	0.191	0.056	0.376	0.718	0.106	0.114	0.358	0.091	0.007	0.048	0.085	0.079	0.063	0.528	0.465	0.383	0.599	0.484	0.109	0.211	0.589	0.197	0.465	0.437	0.279	0.044	0.031	0.048	0.002	0.025	0.66	0.276	0.505	0
190	210	290	0.115	0.508	0.164	0.165	0.11	0.091	0.055	0.033	0.116	0.154	0.126	0.213	0.272	0.25	0.057	0.342	0.562	0.096	0.097	0.32	0.011	0.005	0.049	0.029	0.067	0.062	0.441	0.402	0.312	0.516	0.426	0.11	0.114	0.507	0.155	0.396	0.364	0.228	0.002	0.023	0.044	0.002	0.007	0.493	0.603	0.386	0
210	210	290	0.11	0.422	0.081	0.126	0.109	0.14	0.046	0.038	0.119	0.127	0.119	0.23	0.258	0.271	0.059	0.275	0.543	0.098	0.086	0.273	0.007	0.011	0.055	0.027	0.17	0.062	0.344	0.352	0.26	0.454	0.365	0.07	0.081	0.431	0.15	0.347	0.315	0.187	0.002	0.024	0.044	0.001	0.004	0.419	0.372	0.102	0
230	210	290	0.105	0.368	0.036	0.103	0.09	0.136	0.031	0.061	0.145	0.109	0.106	0.202	0.231	0.298	0.048	0.218	0.48	0.085	0.072	0.215	0.005	0.018	0.042	0.02	0.156	0.053	0.277	0.3	0.21	0.368	0.276	0.045	0.059	0.365	0.138	0.295	0.268	0.155	0.002	0.018	0.032	0.001	0.002	0.344	0.202	0.009	0
250	210	290	0.08	0.272	0.024	0.089	0.079	0.065	0.015	0.07	0.122	0.088	0.091	0.156	0.207	0.264	0.039	0.148	0.42	0.067	0.061	0.153	0.004	0.016	0.025	0.013	0.121	0.039	0.213	0.247	0.171	0.3	0.214	0.031	0.044	0.319	0.118	0.248	0.224	0.127	0.002	0.015	0.024	0.001	0.001	0.271	0.179	0.007	0
270	210	290	0.057	0.199	0.016	0.07	0.073	0.03	0.005	0.062	0.128	0.072	0.088	0.111	0.19	0.191	0.03	0.098	0.354	0.07	0.052	0.118	0.002	0.032	0.016	0.014	0.078	0.033	0.167	0.208	0.135	0.242	0.164	0.012	0.033	0.287	0.081	0.18	0.177	0.107	0.001	0.004	0.016	0	0.001	0.207	0.155	0.001	0
150	230	230	0.211	0.607	0.047	0.369	0.145	0.794	0.018	0.038	0.702	0.257	0.09	0.536	0.265	0.12	0.049	0.446	0.877	0.136	0.173	0.446	0.485	0.473	0.088	0.057	0.732	0.083	0.783	0.683	0.537	0.72	0.658	0.103	0.312	0.683	0.27	0.715	0.621	0.387	0.069	0.026	0.012	0.002	0.003	0.59	0.052	0.032	0.001
170	230	230	0.213	0.527	0.057	0.206	0.13	0.56	0.033	0.041	0.447	0.226	0.106	0.436	0.267	0.175	0.063	0.323	0.733	0.119	0.133	0.347	0.168	0.33	0.087	0.066	0.548	0.072	0.573	0.497	0.385	0.635	0.502	0.073	0.183	0.548	0.199	0.525	0.46	0.294	0.025	0.019	0.019	0.001	0.013	0.462	0.087	0.048	0.001
190	230	230	0.138	0.368	0.051	0.137	0.082	0.356	0.051	0.036	0.331	0.166	0.102	0.323	0.259	0.172	0.051	0.209	0.49	0.104	0.093	0.246	0.049	0.24	0.062	0.043	0.443	0.059	0.39	0.335	0.255	0.518	0.325	0.044	0.101	0.406	0.136	0.339	0.317	0.192	0.015	0.014	0.013	0.001	0.005	0.272	0.037	0.026	0.002
210	230	230	0.077	0.199	0.044	0.091	0.052	0.167	0.05	0.025	0.197	0.115	0.075	0.21	0.217	0.141	0.038	0.122	0.289	0.067	0.06	0.164	0.025	0.123	0.035	0.032	0.291	0.044	0.242	0.218	0.161	0.3	0.2	0.017	0.064	0.274	0.092	0.216	0.197	0.121	0.009	0.008	0.006	0.001	0.001	0.162	0.029	0.008	0
130	230	250	0.239	0.565	0.05	0.887	0.142	0.696	0.057	0.038	0.96	0.241	0.073	0.764	0.278	0.075	0.033	0.515	0.791	0.167	0.192	0.458	1	0.572	0.071	0.052	0.863	0.081	0.992	1	0.668	0.871	0.779	0.089	0.567	0.968	0.349	0.911	0.781	0.467	0.141	0.025	0.009	0.002	0.015	0.645	0.081	0.048	0.002
150	230	250	0.23	0.517	0.047	0.561	0.148	0.743	0.057	0.04	0.718	0.258	0.082	0.584	0.259	0.122	0.043	0.43	0.741	0.155	0.162	0.398	0.579	0.31	0.074	0.083	0.624	0.086	0.789	0.682	0.541	0.731	0.65	0.114	0.432	0.769	0.274	0.715	0.634	0.353	0.073	0.038	0.013	0.002	0.01	0.581	0.088	0.489	0.002
170	230	250	0.213	0.505	0.054	0.247	0.133	0.468	0.044	0.049	0.46	0.199	0.096	0.439	0.253	0.176	0.057	0.331	0.662	0.134	0.131	0.328	0.194	0.193	0.08	0.105	0.489	0.081	0.57	0.521	0.399	0.623	0.496	0.098	0.249	0.593	0.199	0.537	0.474	0.275	0.022	0.031	0.014	0.002	0.02	0.514	0.073	0.206	0
190	230	250	0.163	0.428	0.041	0.151	0.105	0.297	0.031	0.068	0.353	0.171	0.106	0.336	0.261	0.214	0.061	0.278	0.601	0.106	0.101	0.279	0.039	0.098	0.069	0.066	0.347	0.065	0.436	0.395	0.299	0.499	0.367	0.066	0.112	0.463	0.149	0.385	0.351	0.206	0.008	0.025	0.017	0.001	0.003	0.43	0.054	0.072	0
210	230	250	0.132	0.346	0.049	0.146	0.093	0.203	0.062	0.066	0.261	0.128	0.098	0.263	0.242	0.224	0.053	0.216	0.486	0.086	0.078	0.216	0.034	0.062	0.054	0.046	0.269	0.062	0.329	0.318	0.228	0.388	0.276	0.034	0.084	0.378	0.122	0.308	0.28	0.169	0.007	0.02	0.02	0.001	0.002	0.319	0.075	0.014	0
230	230	250	0.099	0.256	0.032	0.147	0.072	0.138	0.04	0.067	0.201	0.099	0.086	0.217	0.226	0.222	0.041	0.169	0.394	0.073	0.066	0.166	0.046	0.026	0.036	0.026	0.193	0.05	0.252	0.26	0.183	0.309	0.215	0.025	0.075	0.322	0.115	0.248	0.233	0.142	0.012	0.015	0.015	0.001	0.001	0.268	0.065	0.001	0
250	230	250	0.061	0.174	0.021	0.073	0.06	0.078	0.012	0.055	0.132	0.074	0.068	0.127	0.178	0.166	0.032	0.133	0.291	0.069	0.046	0.133	0.023	0.021	0.02	0.016	0.13	0.034	0.166	0.179	0.122	0.211	0.14	0.008	0.04	0.238	0.091	0.174	0.158	0.099	0.006	0.007	0.011	0.001	0.001	0.173	0.026	0	0
110	230	270	0.273	0.516	0.054	0.687	0.148	0.354	0.048	0.033	0.704	0.127	0.065	0.84	0.219	0.064	0.017	0.43	0.559	0.568	0.168	0.545	0.856	0.568	0.07	0.057	1	0.109	0.879	0.951	0.654	0.852	0.735	0.079	0.528	0.86	0.35	0.845	0.776	0.449	0.263	0.032	0.011	0.003	0.062	0.721	0.038	0.041	0.01
130	230	270	0.237	0.472	0.042	0.899	0.146	0.57	0.087	0.041	0.884	0.283	0.072	0.802	0.275	0.088	0.03	0.413	0.702	0.206	0.154	0.433	0.893	0.349	0.062	0.064	0.729	0.184	0.822	0.848	0.601	0.767	0.64	0.079	0.547	0.82	0.283	0.766	0.7	0.382	0.256	0.028	0.007	0.002	0.005	0.711	0.061	0.195	0
150	230	270	0.213	0.474	0.043	0.779	0.129	0.645	0.059	0.054	0.648	0.257	0.076	0.618	0.252	0.121	0.036	0.371	0.739	0.151	0.138	0.354	0.608	0.2	0.062	0.103	0.524	0.083	0.702	0.617	0.5	0.664	0.563	0.107	0.511	0.727	0.239	0.621	0.592	0.31	0.111	0.031	0.014	0.002	0.009	0.632	0.122	0.522	0
170	230	270	0.178	0.446	0.049	0.274	0.12	0.331	0.073	0.053	0.408	0.169	0.088	0.421	0.224	0.169	0.047	0.338	0.628	0.114	0.11	0.293	0.191	0.09	0.057	0.128	0.351	0.069	0.522	0.472	0.379	0.538	0.443	0.116	0.275	0.562	0.179	0.463	0.427	0.248	0.027	0.028	0.02	0.002	0.006	0.503	0.11	0.301	0
190	230	270	0.152	0.416	0.046	0.146	0.107	0.198	0.068	0.07	0.306	0.145	0.099	0.333	0.232	0.216	0.053	0.268	0.593	0.102	0.091	0.246	0.039	0.049	0.056	0.083	0.264	0.063	0.409	0.376	0.286	0.467	0.349	0.073	0.12	0.454	0.142	0.362	0.333	0.192	0.006	0.023	0.022	0.001	0.004	0.451	0.094	0.127	0
210	230	270	0.133	0.331	0.052	0.122	0.099	0.123	0.074	0.073	0.218	0.117	0.103	0.261	0.236	0.256	0.051	0.215	0.497	0.082	0.073	0.201	0.015	0.028	0.042	0.04	0.202	0.058	0.316	0.309	0.222	0.38	0.278	0.044	0.072	0.377	0.121	0.297	0.272	0.16	0.002	0.019	0.024	0.001	0.003	0.34	0.084	0.026	0
230	230	270	0.099	0.235	0.033	0.102	0.084	0.07	0.041	0.089	0.176	0.097	0.094	0.212	0.226	0.304	0.043	0.173	0.434	0.077	0.064	0.158	0.007	0.024	0.031	0.025	0.179	0.046	0.255	0.266	0.186	0.315	0.221	0.028	0.05	0.324	0.109	0.256	0.237	0.142	0.001	0.017	0.024	0.001	0.001	0.283	0.066	0.001	0
250	230	270	0.074	0.187	0.02	0.087	0.09	0.038	0.011	0.116	0.192	0.081	0.086	0.158	0.197	0.242	0.036	0.131	0.393	0.066	0.055	0.128	0.003	0.07	0.022	0.02	0.163	0.035	0.206	0.227	0.155	0.254	0.176	0.013	0.037	0.286	0.103	0.218	0.206	0.128	0.001	0.012	0.013	0.001	0.001	0.216	0.047	0.002	0
270	230	270	0.049	0.117	0.013	0.047	0.051	0.022	0.004	0.089	0.158	0.062	0.068	0.107	0.157	0.139	0.022	0.079	0.259	0.082	0.041	0.099	0.002	0.057	0.015	0.008	0.137	0.025	0.144	0.161	0.107	0.185	0.119	0.004	0.027	0.236	0.058	0.14	0.144	0.098	0.001	0.003	0.006	0	0	0.115	0.016	0	0
110	230	290	0.293	0.479	0.049	0.458	0.142	0.232	0.035	0.026	0.611	0.077	0.05	0.761	0.146	0.058	0.015	0.342	0.451	1	0.147	0.388	0.443	0.359	0.202	0.033	0.771	0.122	0.755	0.731	0.586	0.741	0.593	0.099	0.429	0.68	0.27	0.649	0.578	0.422	0.361	0.047	0.013	0.004	0.139	0.74	0.038	0.027	0.099
130	230	290	0.182	0.406	0.039	0.771	0.115	0.461	0.055	0.048	0.838	0.131	0.068	0.787	0.24	0.072	0.023	0.315	0.669	0.211	0.131	0.392	0.646	0.186	0.057	0.089	0.633	0.17	0.676	0.656	0.538	0.66	0.518	0.056	0.477	0.667	0.219	0.556	0.531	0.369	0.353	0.03	0.013	0.002	0.004	0.758	0.085	0.459	0
150	230	290	0.169	0.51	0.055	0.685	0.11	0.383	0.05	0.057	0.636	0.156	0.07	0.564	0.218	0.106	0.031	0.327	0.779	0.185	0.11	0.319	0.471	0.105	0.121	0.136	0.327	0.158	0.582	0.488	0.451	0.57	0.457	0.079	0.452	0.598	0.186	0.479	0.473	0.27	0.175	0.032	0.023	0.002	0.004	0.7	0.134	0.8	0
170	230	290	0.137	0.49	0.059	0.194	0.109	0.111	0.096	0.046	0.294	0.141	0.085	0.337	0.192	0.167	0.044	0.397	0.637	0.121	0.093	0.249	0.059	0.017	0.062	0.154	0.129	0.065	0.452	0.416	0.339	0.497	0.388	0.097	0.166	0.513	0.148	0.385	0.364	0.202	0.014	0.024	0.038	0.001	0.005	0.533	0.343	0.285	0
190	230	290	0.126	0.402	0.049	0.127	0.103	0.078	0.047	0.063	0.2	0.122	0.09	0.303	0.201	0.21	0.041	0.251	0.543	0.116	0.083	0.213	0.011	0.013	0.042	0.076	0.121	0.055	0.373	0.346	0.279	0.437	0.342	0.073	0.096	0.442	0.133	0.34	0.298	0.172	0.003	0.026	0.035	0.001	0.005	0.435	0.386	0.173	0
210	230	290	0.111	0.291	0.048	0.116	0.102	0.057	0.033	0.082	0.187	0.108	0.098	0.253	0.208	0.259	0.044	0.22	0.542	0.078	0.074	0.174	0.004	0.015	0.041	0.034	0.129	0.05	0.318	0.31	0.238	0.377	0.303	0.064	0.062	0.397	0.132	0.304	0.27	0.16	0.002	0.023	0.031	0.001	0.008	0.375	0.244	0.061	0
230	230	290	0.091	0.242	0.026	0.092	0.079	0.043	0.02	0.114	0.189	0.102	0.108	0.214	0.219	0.278	0.044	0.161	0.506	0.095	0.067	0.139	0.002	0.022	0.026	0.022	0.166	0.039	0.274	0.292	0.198	0.332	0.245	0.036	0.047	0.354	0.114	0.275	0.244	0.143	0.001	0.016	0.025	0.001	0.002	0.336	0.102	0.016	0
250	230	290	0.066	0.184	0.017	0.083	0.082	0.028	0.006	0.13	0.188	0.086	0.1	0.159	0.201	0.229	0.038	0.11	0.422	0.069	0.056	0.109	0.002	0.07	0.017	0.018	0.15	0.031	0.202	0.232	0.156	0.259	0.182	0.009	0.036	0.289	0.103	0.219	0.194	0.122	0.002	0.013	0.014	0.001	0	0.246	0.096	0.002	0
270	230	290	0.045	0.121	0.012	0.05	0.051	0.019	0.004	0.078	0.143	0.061	0.071	0.105	0.15	0.147	0.025	0.078	0.253	0.087	0.042	0.091	0.002	0.058	0.014	0.01	0.129	0.024	0.137	0.162	0.105	0.193	0.121	0.003	0.026	0.23	0.06	0.134	0.138	0.094	0.001	0.002	0.006	0	0	0.13	0.023	0	0
130	250	230	0.142	0.397	0.043	0.375	0.096	0.498	0.124	0.016	0.593	0.128	0.064	0.513	0.192	0.053	0.025	0.314	0.482	0.131	0.156	0.352	0.676	0.761	0.051	0.131	0.838	0.071	0.709	0.811	0.488	0.63	0.601	0.038	0.433	0.696	0.239	0.621	0.622	0.335	0.098	0.016	0.007	0.002	0.027	0.245	0.072	0	0.128
150	250	230	0.171	0.5	0.049	0.261	0.101	0.717	0.138	0.026	0.702	0.223	0.096	0.519	0.265	0.111	0.034	0.297	0.719	0.115	0.15	0.356	0.454	0.68	0.062	0.153	0.779	0.075	0.677	0.584	0.454	0.692	0.585	0.057	0.324	0.663	0.235	0.721	0.613	0.321	0.044	0.015	0.014	0.002	0.004	0.281	0.078	0.043	0.033
170	250	230	0.148	0.349	0.051	0.131	0.073	0.316	0.094	0.02	0.435	0.179	0.1	0.39	0.229	0.11	0.035	0.178	0.518	0.094	0.094	0.236	0.083	0.393	0.047	0.102	0.585	0.054	0.43	0.352	0.278	0.59	0.363	0.036	0.137	0.455	0.157	0.4	0.374	0.198	0.018	0.011	0.014	0.001	0.016	0.203	0.038	0.061	0.036
190	250	230	0.102	0.2	0.036	0.078	0.047	0.111	0.085	0.015	0.263	0.109	0.074	0.259	0.204	0.105	0.025	0.115	0.233	0.072	0.058	0.162	0.007	0.237	0.032	0.035	0.384	0.042	0.268	0.221	0.169	0.427	0.227	0.017	0.06	0.299	0.095	0.245	0.223	0.122	0.004	0.007	0.009	0.001	0.001	0.117	0.023	0.001	0.005
110	250	250	0.288	0.482	0.049	0.408	0.116	0.239	0.035	0.018	0.511	0.281	0.069	0.637	0.219	0.103	0.031	0.376	0.394	0.201	0.173	0.43	0.544	0.446	0.111	0.031	0.832	0.08	0.867	0.872	0.512	0.658	0.634	0.062	0.491	0.896	0.276	0.683	0.688	0.396	0.141	0.021	0.029	0.009	0.037	0.398	0.01	0.002	0.087
130	250	250	0.23	0.533	0.05	0.622	0.13	0.578	0.148	0.023	0.878	0.218	0.081	0.666	0.225	0.068	0.028	0.43	0.586	0.192	0.188	0.409	0.913	0.725	0.077	0.145	0.956	0.084	1	0.958	0.597	0.803	0.708	0.068	0.74	1	0.298	0.834	0.73	0.394	0.087	0.027	0.01	0.008	0.019	0.361	0.431	0.024	0.04
150	250	250	0.215	0.466	0.045	0.289	0.118	0.653	0.177	0.039	0.715	0.227	0.091	0.527	0.246	0.114	0.034	0.366	0.528	0.135	0.152	0.371	0.551	0.404	0.16	0.293	0.765	0.073	0.771	0.636	0.478	0.693	0.588	0.065	0.481	0.777	0.236	0.739	0.608	0.312	0.053	0.026	0.015	0.002	0.018	0.372	0.16	0.119	0
170	250	250	0.194	0.375	0.041	0.159	0.11	0.316	0.119	0.041	0.439	0.179	0.097	0.379	0.229	0.144	0.044	0.241	0.517	0.105	0.106	0.247	0.115	0.226	0.063	0.126	0.561	0.065	0.506	0.426	0.338	0.582	0.408	0.071	0.181	0.547	0.17	0.477	0.4	0.218	0.01	0.029	0.01	0.003	0.003	0.317	0.055	0.081	0
190	250	250	0.153	0.28	0.034	0.108	0.084	0.158	0.096	0.051	0.304	0.125	0.087	0.276	0.216	0.168	0.04	0.191	0.394	0.086	0.076	0.194	0.012	0.122	0.044	0.048	0.395	0.054	0.342	0.311	0.238	0.432	0.288	0.047	0.073	0.384	0.122	0.325	0.282	0.159	0.004	0.02	0.009	0.001	0.002	0.241	0.042	0.02	0
210	250	250	0.117	0.204	0.046	0.09	0.071	0.1	0.107	0.046	0.218	0.096	0.076	0.197	0.181	0.16	0.032	0.155	0.303	0.078	0.06	0.156	0.007	0.049	0.03	0.028	0.288	0.045	0.26	0.248	0.182	0.317	0.213	0.025	0.052	0.299	0.094	0.248	0.212	0.129	0.002	0.013	0.011	0.001	0.001	0.177	0.039	0.016	0
230	250	250	0.089	0.148	0.034	0.096	0.056	0.087	0.063	0.039	0.138	0.077	0.067	0.162	0.165	0.159	0.029	0.136	0.273	0.084	0.051	0.136	0.014	0.027	0.023	0.018	0.199	0.039	0.199	0.206	0.149	0.24	0.162	0.015	0.047	0.244	0.08	0.208	0.171	0.111	0.004	0.013	0.009	0.001	0.001	0.159	0.035	0.001	0
110	250	270	0.257	0.45	0.042	0.457	0.111	0.211	0.134	0.018	0.498	0.273	0.072	0.687	0.212	0.073	0.029	0.366	0.379	0.315	0.155	0.41	0.511	0.268	0.089	0.052	0.936	0.109	0.787	0.783	0.562	0.678	0.572	0.091	0.49	0.747	0.252	0.676	0.695	0.481	0.079	0.066	0.039	0.01	0.101	0.473	0.03	0.001	0.101
130	250	270	0.212	0.412	0.042	0.678	0.105	0.459	0.215	0.024	0.759	0.168	0.067	0.72	0.19	0.067	0.025	0.387	0.487	0.239	0.153	0.378	0.754	0.37	0.057	0.135	0.85	0.087	0.83	0.795	0.543	0.703	0.556	0.068	0.65	0.812	0.243	0.678	0.632	0.341	0.118	0.039	0.007	0.002	0.007	0.396	0.216	0.145	0.024
150	250	270	0.198	0.407	0.038	0.397	0.108	0.422	0.146	0.049	0.656	0.16	0.074	0.516	0.193	0.1	0.033	0.369	0.445	0.149	0.125	0.292	0.511	0.196	0.074	0.306	0.648	0.068	0.671	0.57	0.429	0.603	0.466	0.066	0.5	0.658	0.2	0.591	0.503	0.258	0.051	0.026	0.016	0.002	0.006	0.403	0.074	0.237	0
170	250	270	0.184	0.337	0.034	0.163	0.115	0.244	0.091	0.076	0.435	0.137	0.077	0.344	0.184	0.143	0.039	0.255	0.483	0.11	0.094	0.233	0.125	0.113	0.051	0.135	0.436	0.063	0.471	0.424	0.307	0.466	0.353	0.065	0.196	0.482	0.148	0.407	0.356	0.2	0.008	0.024	0.015	0.001	0.003	0.371	0.043	0.085	0
190	250	270	0.142	0.292	0.029	0.111	0.098	0.148	0.072	0.099	0.297	0.114	0.08	0.272	0.199	0.169	0.039	0.208	0.476	0.083	0.073	0.188	0.012	0.052	0.041	0.061	0.326	0.055	0.341	0.323	0.238	0.388	0.273	0.045	0.072	0.37	0.115	0.311	0.267	0.157	0.003	0.02	0.014	0.001	0.002	0.298	0.045	0.023	0
210	250	270	0.113	0.22	0.034	0.09	0.079	0.091	0.083	0.09	0.233	0.092	0.079	0.208	0.182	0.179	0.037	0.181	0.41	0.078	0.062	0.152	0.005	0.027	0.029	0.031	0.239	0.048	0.271	0.274	0.185	0.308	0.215	0.028	0.051	0.305	0.096	0.264	0.214	0.132	0.002	0.014	0.017	0.001	0.001	0.239	0.05	0.011	0
230	250	270	0.087	0.135	0.028	0.067	0.073	0.045	0.049	0.087	0.156	0.075	0.071	0.153	0.167	0.175	0.029	0.13	0.322	0.078	0.053	0.12	0.003	0.011	0.02	0.018	0.194	0.037	0.212	0.229	0.155	0.253	0.17	0.013	0.039	0.25	0.082	0.215	0.175	0.117	0.001	0.014	0.016	0.001	0.001	0.178	0.03	0	0
250	250	270	0.062	0.094	0.017	0.052	0.088	0.025	0.012	0.089	0.139	0.063	0.064	0.104	0.144	0.138	0.023	0.098	0.271	0.085	0.046	0.096	0.002	0.007	0.015	0.007	0.137	0.028	0.17	0.197	0.13	0.209	0.134	0.004	0.03	0.222	0.09	0.182	0.143	0.099	0.001	0.011	0.013	0.001	0.001	0.124	0.016	0.015	0
270	250	270	0.041	0.053	0.014	0.04	0.04	0.016	0.003	0.052	0.117	0.052	0.049	0.07	0.111	0.097	0.017	0.075	0.203	0.095	0.037	0.082	0.002	0.002	0.013	0.004	0.09	0.022	0.128	0.149	0.099	0.165	0.1	0.002	0.023	0.194	0.048	0.143	0.112	0.076	0.001	0.002	0.009	0	0	0.09	0.008	0	0
110	250	290	0.22	0.428	0.04	0.272	0.115	0.12	0.181	0.024	0.46	0.103	0.038	0.627	0.125	0.047	0.015	0.337	0.253	0.917	0.12	0.323	0.266	0.195	0.088	0.059	0.748	0.088	0.629	0.609	0.566	0.613	0.447	0.115	0.304	0.519	0.194	0.514	0.518	0.46	0.143	0.09	0.022	0.004	0.068	0.471	0.04	0.02	0.115
130	250	290	0.18	0.411	0.035	0.591	0.094	0.25	0.209	0.034	0.709	0.085	0.056	0.679	0.153	0.053	0.017	0.3	0.354	0.176	0.117	0.355	0.588	0.278	0.051	0.163	0.683	0.066	0.621	0.616	0.516	0.57	0.427	0.043	0.467	0.566	0.18	0.465	0.476	0.317	0.218	0.04	0.007	0.002	0.008	0.468	0.038	0.319	0
150	250	290	0.158	0.35	0.033	0.333	0.09	0.23	0.132	0.066	0.608	0.109	0.06	0.514	0.149	0.09	0.023	0.289	0.482	0.24	0.098	0.256	0.381	0.109	0.049	0.305	0.502	0.052	0.529	0.444	0.399	0.5	0.378	0.059	0.408	0.52	0.156	0.452	0.398	0.218	0.06	0.025	0.011	0.002	0.004	0.441	0.053	0.243	0
170	250	290	0.134	0.303	0.027	0.143	0.093	0.128	0.084	0.128	0.398	0.1	0.065	0.359	0.148	0.118	0.027	0.233	0.493	0.105	0.076	0.182	0.056	0.051	0.037	0.168	0.351	0.051	0.386	0.338	0.279	0.397	0.296	0.06	0.13	0.405	0.122	0.332	0.299	0.169	0.01	0.023	0.015	0.001	0.003	0.331	0.065	0.041	0
190	250	290	0.121	0.25	0.024	0.119	0.116	0.053	0.045	0.165	0.283	0.091	0.071	0.269	0.173	0.145	0.029	0.19	0.465	0.081	0.067	0.148	0.005	0.038	0.032	0.094	0.245	0.046	0.323	0.281	0.227	0.346	0.246	0.031	0.059	0.339	0.113	0.274	0.237	0.144	0.002	0.016	0.01	0.001	0.002	0.289	0.05	0.021	0
210	250	290	0.094	0.198	0.027	0.082	0.086	0.033	0.025	0.163	0.249	0.086	0.077	0.216	0.161	0.153	0.03	0.159	0.436	0.071	0.059	0.127	0.002	0.047	0.024	0.037	0.214	0.04	0.271	0.287	0.189	0.291	0.21	0.018	0.043	0.296	0.097	0.244	0.2	0.135	0.002	0.016	0.013	0.001	0.001	0.256	0.035	0.002	0
230	250	290	0.071	0.13	0.022	0.072	0.069	0.025	0.01	0.125	0.188	0.074	0.073	0.148	0.156	0.142	0.03	0.115	0.348	0.082	0.051	0.103	0.002	0.036	0.018	0.021	0.191	0.031	0.212	0.27	0.15	0.235	0.162	0.006	0.034	0.249	0.079	0.2	0.165	0.124	0.001	0.012	0.012	0.001	0.001	0.181	0.018	0	0
250	250	290	0.052	0.083	0.015	0.058	0.059	0.018	0.007	0.079	0.135	0.058	0.059	0.088	0.128	0.131	0.025	0.081	0.242	0.096	0.041	0.09	0.002	0.027	0.014	0.008	0.122	0.024	0.151	0.181	0.115	0.185	0.121	0.002	0.027	0.206	0.083	0.155	0.127	0.105	0.001	0.009	0.015	0.001	0	0.111	0.015	0	0
270	250	290	0.039	0.056	0.018	0.053	0.03	0.015	0.004	0.042	0.102	0.052	0.049	0.064	0.106	0.103	0.02	0.077	0.199	0.11	0.037	0.099	0.002	0.005	0.011	0.004	0.091	0.022	0.125	0.15	0.097	0.166	0.103	0.002	0.023	0.19	0.049	0.141	0.109	0.089	0	0.002	0.021	0	0	0.103	0.011	0	0
130	270	230	0.129	0.223	0.029	0.114	0.068	0.107	0.089	0.011	0.339	0.17	0.043	0.287	0.141	0.275	0.031	0.164	0.123	0.089	0.09	0.294	0.04	0.103	0.047	0.04	0.495	0.048	0.395	0.434	0.266	0.414	0.32	0.034	0.104	0.398	0.158	0.348	0.424	0.441	0.012	0.014	0.081	0.002	0.003	0.066	0.008	0	0.222
230	270	230	0.054	0.068	0.029	0.049	0.037	0.021	0.039	0.017	0.104	0.056	0.035	0.107	0.123	0.094	0.019	0.114	0.099	0.154	0.042	0.089	0.004	0.033	0.019	0.014	0.162	0.049	0.14	0.143	0.099	0.171	0.111	0.005	0.032	0.161	0.063	0.162	0.113	0.084	0.002	0.009	0.01	0.001	0.001	0.037	0.009	0	0.001
110	270	250	0.216	0.376	0.038	0.157	0.114	0.064	0.026	0.024	0.428	0.435	0.102	0.484	0.285	0.225	0.059	0.242	0.22	0.138	0.135	0.646	0.016	0.054	0.075	0.029	0.716	0.068	0.601	0.599	0.424	0.548	0.422	0.066	0.119	0.598	0.221	0.543	0.761	1	0.001	0.027	0.246	0.003	0.005	0.257	0.018	0	0.154
130	270	250	0.195	0.349	0.03	0.129	0.094	0.118	0.04	0.016	0.436	0.222	0.073	0.397	0.193	0.247	0.042	0.204	0.129	0.148	0.106	0.319	0.072	0.099	0.067	0.089	0.708	0.058	0.514	0.533	0.332	0.486	0.36	0.038	0.165	0.532	0.183	0.439	0.474	0.407	0.019	0.025	0.17	0.001	0.003	0.088	0.062	0.002	0.084
150	270	250	0.176	0.274	0.023	0.108	0.08	0.178	0.106	0.014	0.398	0.101	0.063	0.269	0.149	0.089	0.026	0.166	0.115	0.09	0.077	0.201	0.071	0.195	0.146	0.085	0.581	0.051	0.413	0.405	0.243	0.402	0.305	0.039	0.168	0.469	0.134	0.389	0.336	0.181	0.012	0.024	0.035	0.001	0.004	0.052	0.016	0.004	0.201
170	270	250	0.126	0.164	0.022	0.074	0.052	0.045	0.098	0.013	0.295	0.097	0.079	0.222	0.161	0.112	0.026	0.131	0.109	0.071	0.055	0.144	0.004	0.167	0.031	0.094	0.436	0.045	0.288	0.239	0.169	0.288	0.213	0.036	0.053	0.324	0.093	0.279	0.212	0.127	0.001	0.011	0.007	0.001	0.016	0.037	0.013	0.009	0.006
190	270	250	0.096	0.132	0.053	0.058	0.043	0.027	0.118	0.016	0.179	0.082	0.069	0.192	0.161	0.123	0.025	0.116	0.103	0.06	0.049	0.123	0.002	0.128	0.023	0.038	0.353	0.034	0.227	0.208	0.152	0.242	0.169	0.012	0.039	0.246	0.078	0.223	0.164	0.112	0.002	0.007	0.003	0.001	0.001	0.033	0.014	0.003	0
210	270	250	0.076	0.135	0.093	0.064	0.043	0.034	0.119	0.02	0.139	0.075	0.061	0.17	0.141	0.122	0.024	0.127	0.131	0.072	0.051	0.118	0.003	0.085	0.021	0.024	0.309	0.037	0.206	0.209	0.151	0.232	0.159	0.008	0.037	0.227	0.079	0.214	0.157	0.106	0.001	0.01	0.004	0.001	0.001	0.062	0.022	0.009	0
230	270	250	0.067	0.121	0.048	0.09	0.049	0.058	0.08	0.029	0.114	0.07	0.057	0.149	0.139	0.143	0.024	0.139	0.225	0.105	0.05	0.127	0.008	0.025	0.019	0.016	0.189	0.038	0.194	0.21	0.14	0.226	0.149	0.008	0.042	0.213	0.078	0.212	0.153	0.107	0.004	0.012	0.011	0.001	0.001	0.133	0.031	0.002	0
250	270	250	0.046	0.093	0.029	0.068	0.05	0.046	0.021	0.038	0.1	0.06	0.049	0.116	0.119	0.118	0.019	0.123	0.243	0.114	0.043	0.112	0.011	0.009	0.015	0.008	0.113	0.028	0.151	0.173	0.117	0.182	0.112	0.004	0.034	0.18	0.081	0.176	0.126	0.089	0.004	0.007	0.016	0.001	0.001	0.16	0.015	0	0
110	270	270	0.194	0.318	0.033	0.142	0.108	0.055	0.027	0.025	0.403	0.321	0.09	0.432	0.277	0.13	0.049	0.214	0.175	0.19	0.116	0.407	0.024	0.058	0.065	0.025	0.646	0.066	0.531	0.484	0.384	0.493	0.33	0.06	0.107	0.493	0.178	0.419	0.598	0.658	0.002	0.044	0.178	0.002	0.01	0.169	0.032	0	0.017
130	270	270	0.17	0.276	0.025	0.12	0.078	0.082	0.088	0.018	0.331	0.162	0.06	0.344	0.214	0.11	0.03	0.196	0.107	0.124	0.082	0.221	0.097	0.071	0.086	0.056	0.614	0.051	0.443	0.448	0.287	0.393	0.276	0.031	0.148	0.432	0.14	0.35	0.372	0.252	0.018	0.033	0.082	0.001	0.003	0.084	0.058	0	0.061
150	270	270	0.159	0.237	0.024	0.113	0.074	0.162	0.174	0.023	0.399	0.087	0.054	0.293	0.142	0.067	0.023	0.186	0.138	0.134	0.08	0.175	0.115	0.115	0.118	0.105	0.563	0.048	0.42	0.402	0.266	0.402	0.28	0.032	0.173	0.444	0.122	0.369	0.3	0.169	0.013	0.018	0.017	0.001	0.004	0.077	0.018	0.01	0.062
170	270	270	0.134	0.172	0.026	0.081	0.067	0.057	0.144	0.024	0.323	0.087	0.066	0.232	0.149	0.096	0.027	0.143	0.151	0.081	0.06	0.143	0.007	0.102	0.03	0.086	0.437	0.046	0.309	0.277	0.189	0.314	0.216	0.025	0.063	0.33	0.094	0.296	0.212	0.124	0.004	0.012	0.008	0.001	0.001	0.057	0.017	0.002	0
190	270	270	0.107	0.14	0.055	0.065	0.06	0.031	0.123	0.032	0.209	0.08	0.06	0.191	0.152	0.109	0.026	0.124	0.149	0.077	0.054	0.117	0.002	0.114	0.023	0.049	0.341	0.037	0.247	0.237	0.167	0.255	0.178	0.015	0.04	0.255	0.082	0.236	0.169	0.107	0.002	0.012	0.004	0.001	0.001	0.056	0.021	0.011	0
210	270	270	0.084	0.114	0.077	0.063	0.05	0.032	0.115	0.041	0.157	0.072	0.057	0.163	0.129	0.105	0.025	0.13	0.18	0.078	0.055	0.112	0.003	0.054	0.021	0.036	0.274	0.035	0.224	0.227	0.165	0.239	0.176	0.012	0.038	0.231	0.083	0.228	0.157	0.109	0.001	0.013	0.006	0.001	0.001	0.103	0.026	0.009	0
230	270	270	0.069	0.09	0.04	0.062	0.051	0.03	0.066	0.058	0.14	0.067	0.055	0.138	0.123	0.131	0.024	0.128	0.249	0.095	0.053	0.117	0.003	0.006	0.019	0.012	0.172	0.035	0.203	0.224	0.153	0.232	0.156	0.009	0.036	0.218	0.078	0.219	0.15	0.11	0	0.014	0.015	0.001	0.001	0.156	0.026	0.003	0
250	270	270	0.053	0.066	0.027	0.063	0.069	0.024	0.023	0.064	0.145	0.064	0.054	0.117	0.125	0.138	0.022	0.111	0.266	0.11	0.05	0.112	0.003	0.004	0.016	0.007	0.103	0.032	0.18	0.208	0.138	0.214	0.135	0.005	0.031	0.21	0.097	0.207	0.142	0.115	0	0.012	0.02	0.001	0.001	0.172	0.021	0.001	0
270	270	270	0.043	0.05	0.023	0.062	0.041	0.02	0.004	0.048	0.161	0.059	0.054	0.095	0.119	0.13	0.02	0.097	0.263	0.116	0.048	0.111	0.002	0.003	0.014	0.005	0.101	0.028	0.158	0.192	0.154	0.197	0.122	0.003	0.027	0.213	0.066	0.187	0.14	0.103	0.001	0.006	0.016	0.001	0	0.174	0.018	0	0
290	270	270	0.029	0.049	0.03	0.05	0.028	0.02	0.005	0.035	0.126	0.053	0.052	0.093	0.117	0.169	0.02	0.09	0.174	0.124	0.04	0.099	0.002	0.003	0.012	0.005	0.107	0.026	0.127	0.159	0.166	0.169	0.095	0.004	0.024	0.189	0.053	0.155	0.128	0.101	0.001	0.001	0.017	0	0	0.149	0.006	0	0
90	270	290	0.254	0.021	0.127	0.014	0.179	0.007	0.006	0.03	0.063	0.188	0.05	0.31	0.213	0.123	0.038	0.023	0.042	0.031	0.011	0.121	0.074	0.081	0.009	0.021	0.357	0.009	0.057	0.056	0.042	0.054	0.042	0.056	0.01	0.043	0.019	0.054	0.058	0.054	0.004	0	0.013	0.001	0	0.279	0	0.001	0.004
110	270	290	0.203	0.253	0.036	0.123	0.105	0.048	0.05	0.027	0.268	0.161	0.049	0.41	0.169	0.07	0.023	0.207	0.118	0.34	0.087	0.273	0.037	0.031	0.067	0.029	0.581	0.08	0.457	0.456	0.349	0.456	0.302	0.09	0.106	0.402	0.157	0.382	0.43	0.289	0.008	0.052	0.057	0.004	0.017	0.163	0.035	0.001	0.042
130	270	290	0.163	0.211	0.025	0.137	0.082	0.069	0.108	0.034	0.317	0.067	0.026	0.342	0.115	0.039	0.013	0.198	0.108	0.119	0.076	0.175	0.098	0.071	0.059	0.114	0.566	0.051	0.396	0.438	0.304	0.381	0.269	0.027	0.152	0.367	0.133	0.303	0.321	0.187	0.031	0.031	0.027	0.001	0.011	0.131	0.024	0.01	0.014
150	270	290	0.143	0.179	0.021	0.122	0.081	0.109	0.162	0.052	0.348	0.07	0.04	0.297	0.112	0.056	0.016	0.169	0.169	0.134	0.07	0.145	0.073	0.055	0.058	0.186	0.515	0.059	0.36	0.407	0.258	0.356	0.244	0.034	0.122	0.355	0.113	0.305	0.265	0.161	0.007	0.017	0.015	0.001	0.005	0.135	0.022	0.005	0.006
170	270	290	0.115	0.145	0.023	0.08	0.092	0.05	0.154	0.07	0.306	0.075	0.054	0.258	0.136	0.075	0.02	0.141	0.233	0.112	0.057	0.125	0.004	0.056	0.034	0.101	0.408	0.049	0.29	0.255	0.208	0.283	0.206	0.021	0.053	0.294	0.089	0.275	0.211	0.126	0.003	0.012	0.014	0.001	0.002	0.095	0.016	0.004	0
190	270	290	0.096	0.127	0.033	0.061	0.092	0.026	0.1	0.084	0.241	0.069	0.052	0.198	0.135	0.089	0.021	0.126	0.219	0.085	0.052	0.116	0.002	0.074	0.03	0.031	0.307	0.034	0.251	0.232	0.179	0.253	0.178	0.012	0.04	0.255	0.081	0.235	0.175	0.109	0.001	0.01	0.01	0.001	0.002	0.089	0.015	0.002	0
210	270	290	0.077	0.095	0.049	0.058	0.053	0.02	0.055	0.067	0.219	0.066	0.049	0.165	0.115	0.094	0.022	0.124	0.249	0.109	0.054	0.104	0.002	0.03	0.02	0.031	0.224	0.037	0.228	0.233	0.165	0.239	0.165	0.011	0.038	0.232	0.084	0.229	0.156	0.118	0.001	0.013	0.014	0.001	0.002	0.118	0.016	0.001	0
230	270	290	0.063	0.056	0.061	0.062	0.04	0.018	0.013	0.053	0.184	0.068	0.057	0.13	0.121	0.12	0.027	0.111	0.286	0.103	0.05	0.096	0.002	0.002	0.017	0.012	0.101	0.031	0.201	0.212	0.148	0.217	0.146	0.004	0.033	0.211	0.075	0.211	0.147	0.16	0	0.013	0.033	0.001	0.001	0.18	0.014	0.002	0
250	270	290	0.047	0.048	0.079	0.086	0.057	0.017	0.004	0.04	0.15	0.067	0.057	0.105	0.123	0.13	0.026	0.099	0.277	0.108	0.05	0.105	0.003	0.001	0.015	0.005	0.04	0.029	0.176	0.208	0.136	0.201	0.134	0.003	0.028	0.206	0.096	0.203	0.132	0.21	0	0.012	0.042	0.001	0.001	0.191	0.018	0.001	0
270	270	290	0.038	0.051	0.033	0.089	0.031	0.018	0.003	0.028	0.153	0.06	0.055	0.095	0.119	0.13	0.022	0.097	0.257	0.117	0.049	0.112	0.002	0.001	0.017	0.006	0.059	0.028	0.162	0.197	0.143	0.2	0.131	0.005	0.029	0.214	0.069	0.193	0.13	0.129	0	0.007	0.038	0.001	0.001	0.196	0.063	0	0
290	270	290	0.033	0.065	0.026	0.067	0.036	0.021	0.006	0.032	0.155	0.058	0.06	0.101	0.126	0.187	0.025	0.091	0.181	0.132	0.045	0.106	0.002	0.002	0.014	0.005	0.126	0.026	0.145	0.178	0.199	0.196	0.115	0.009	0.027	0.205	0.062	0.174	0.136	0.121	0.001	0.001	0.036	0	0.001	0.191	0.031	0	0
230	290	230	0.061	0.067	0.081	0.068	0.051	0.029	0.06	0.054	0.132	0.069	0.044	0.167	0.138	0.196	0.023	0.132	0.159	0.152	0.055	0.116	0.004	0.014	0.021	0.014	0.193	0.041	0.192	0.202	0.212	0.212	0.129	0.009	0.042	0.184	0.081	0.202	0.182	0.126	0.005	0.013	0.031	0.001	0.002	0.134	0.014	0.03	0
110	290	250	0.237	0.216	0.032	0.147	0.132	0.054	0.091	0.026	0.235	0.236	0.077	0.39	0.253	0.198	0.038	0.196	0.188	0.169	0.114	0.781	0.006	0.04	0.093	0.069	0.623	0.139	0.49	0.51	0.463	0.625	0.352	0.155	0.099	0.434	0.192	0.431	0.629	0.954	0.012	0.152	0.199	0.011	0.03	0.227	0.025	0.006	0.126
130	290	250	0.171	0.183	0.022	0.072	0.081	0.033	0.078	0.016	0.315	0.154	0.061	0.327	0.211	0.256	0.031	0.135	0.107	0.099	0.065	0.296	0.002	0.025	0.037	0.014	0.548	0.046	0.328	0.363	0.217	0.335	0.202	0.029	0.059	0.307	0.117	0.293	0.307	0.352	0.004	0.03	0.189	0.001	0.002	0.088	0.018	0	0.056
150	290	250	0.108	0.102	0.021	0.056	0.051	0.022	0.016	0.012	0.258	0.115	0.057	0.246	0.163	0.303	0.022	0.124	0.092	0.076	0.05	0.167	0.001	0.016	0.026	0.011	0.464	0.043	0.269	0.334	0.174	0.252	0.174	0.021	0.043	0.253	0.088	0.282	0.199	0.14	0.001	0.01	0.07	0.001	0.003	0.046	0.013	0	0.306
170	290	250	0.067	0.086	0.026	0.059	0.039	0.017	0.022	0.013	0.196	0.092	0.057	0.202	0.136	0.186	0.023	0.112	0.082	0.095	0.044	0.141	0.001	0.051	0.026	0.02	0.343	0.037	0.212	0.19	0.142	0.199	0.148	0.027	0.032	0.195	0.073	0.221	0.145	0.113	0.001	0.007	0.024	0.001	0.001	0.027	0.012	0	0.03
190	290	250	0.058	0.095	0.037	0.055	0.048	0.017	0.062	0.017	0.142	0.078	0.058	0.182	0.13	0.149	0.024	0.113	0.084	0.155	0.046	0.127	0.002	0.049	0.022	0.014	0.289	0.034	0.203	0.193	0.138	0.198	0.148	0.019	0.032	0.183	0.073	0.208	0.156	0.118	0.001	0.008	0.021	0.001	0.002	0.03	0.018	0	0
210	290	250	0.066	0.091	0.078	0.076	0.063	0.026	0.101	0.029	0.116	0.076	0.056	0.183	0.132	0.163	0.024	0.14	0.121	0.108	0.055	0.13	0.003	0.034	0.02	0.02	0.279	0.041	0.222	0.232	0.164	0.239	0.167	0.02	0.038	0.212	0.088	0.243	0.178	0.124	0.001	0.014	0.022	0.001	0.003	0.064	0.03	0	0.001
230	290	250	0.061	0.089	0.08	0.091	0.058	0.052	0.099	0.035	0.113	0.072	0.052	0.173	0.131	0.162	0.025	0.151	0.224	0.127	0.059	0.145	0.006	0.012	0.021	0.019	0.197	0.042	0.216	0.251	0.174	0.25	0.162	0.015	0.044	0.22	0.091	0.247	0.18	0.133	0.003	0.017	0.022	0.001	0.003	0.155	0.033	0.009	0
250	290	250	0.051	0.092	0.051	0.101	0.067	0.061	0.04	0.043	0.105	0.067	0.048	0.158	0.122	0.148	0.021	0.142	0.26	0.135	0.054	0.13	0.012	0.007	0.018	0.011	0.151	0.035	0.186	0.225	0.2	0.233	0.138	0.008	0.043	0.206	0.096	0.22	0.163	0.134	0.006	0.012	0.028	0.001	0.001	0.204	0.024	0.002	0
110	290	270	0.227	0.266	0.029	0.131	0.126	0.054	0.064	0.032	0.287	0.207	0.07	0.403	0.244	0.136	0.033	0.186	0.167	0.145	0.106	0.533	0.005	0.045	0.063	0.026	0.586	0.088	0.439	0.432	0.307	0.606	0.32	0.104	0.089	0.392	0.152	0.361	0.523	0.763	0.001	0.237	0.23	0.008	0.009	0.19	0.035	0	0.019
130	290	270	0.128	0.165	0.018	0.061	0.064	0.023	0.027	0.022	0.209	0.111	0.045	0.251	0.196	0.117	0.022	0.12	0.072	0.087	0.053	0.145	0.002	0.005	0.029	0.006	0.413	0.038	0.269	0.303	0.173	0.261	0.162	0.014	0.046	0.253	0.085	0.254	0.206	0.168	0.004	0.017	0.207	0.001	0.007	0.031	0.019	0	0.01
150	290	270	0.109	0.094	0.023	0.065	0.058	0.022	0.042	0.017	0.281	0.109	0.055	0.238	0.171	0.311	0.024	0.142	0.122	0.098	0.059	0.158	0.001	0.003	0.026	0.009	0.477	0.043	0.294	0.372	0.199	0.272	0.186	0.023	0.045	0.269	0.092	0.312	0.187	0.127	0.002	0.017	0.12	0.001	0.006	0.065	0.019	0	0.145
170	290	270	0.098	0.095	0.037	0.078	0.061	0.023	0.041	0.035	0.298	0.108	0.058	0.234	0.177	0.299	0.027	0.154	0.157	0.124	0.064	0.154	0.001	0.026	0.031	0.021	0.464	0.048	0.309	0.265	0.21	0.28	0.211	0.046	0.045	0.268	0.104	0.319	0.188	0.137	0.002	0.015	0.048	0.001	0.004	0.048	0.026	0.002	0.043
190	290	270	0.083	0.094	0.075	0.07	0.081	0.022	0.058	0.046	0.219	0.097	0.06	0.219	0.149	0.18	0.029	0.15	0.128	0.135	0.064	0.136	0.002	0.057	0.043	0.019	0.402	0.039	0.297	0.26	0.199	0.269	0.208	0.028	0.042	0.251	0.101	0.285	0.184	0.141	0.001	0.017	0.013	0.001	0.003	0.027	0.037	0.002	0
210	290	270	0.068	0.087	0.128	0.068	0.058	0.023	0.115	0.028	0.133	0.081	0.052	0.181	0.12	0.128	0.027	0.146	0.132	0.094	0.061	0.123	0.002	0.026	0.024	0.03	0.304	0.037	0.261	0.252	0.188	0.258	0.201	0.019	0.04	0.238	0.097	0.266	0.172	0.135	0.001	0.017	0.005	0.001	0.002	0.062	0.04	0	0
230	290	270	0.059	0.083	0.076	0.074	0.056	0.034	0.099	0.032	0.109	0.071	0.05	0.162	0.119	0.135	0.025	0.156	0.234	0.102	0.06	0.141	0.004	0.005	0.02	0.018	0.168	0.04	0.24	0.268	0.182	0.263	0.189	0.021	0.041	0.238	0.094	0.262	0.177	0.137	0.001	0.017	0.019	0.001	0.003	0.175	0.041	0.008	0
250	290	270	0.053	0.087	0.052	0.075	0.073	0.034	0.051	0.048	0.117	0.066	0.049	0.15	0.119	0.152	0.022	0.138	0.296	0.118	0.058	0.132	0.004	0.003	0.018	0.011	0.127	0.037	0.203	0.244	0.167	0.25	0.157	0.014	0.036	0.224	0.103	0.237	0.164	0.138	0.001	0.015	0.032	0.001	0.001	0.204	0.034	0	0
270	290	270	0.045	0.075	0.047	0.075	0.049	0.027	0.026	0.04	0.12	0.063	0.05	0.147	0.124	0.161	0.022	0.113	0.274	0.13	0.052	0.115	0.003	0.004	0.017	0.01	0.125	0.034	0.174	0.216	0.177	0.232	0.136	0.008	0.032	0.22	0.085	0.211	0.166	0.128	0.001	0.011	0.032	0.001	0.001	0.203	0.024	0	0
290	290	270	0.033	0.053	0.072	0.06	0.041	0.021	0.021	0.035	0.084	0.054	0.045	0.138	0.131	0.206	0.02	0.092	0.252	0.12	0.043	0.097	0.003	0.003	0.013	0.011	0.08	0.028	0.138	0.176	0.117	0.192	0.106	0.005	0.026	0.193	0.062	0.18	0.155	0.102	0.001	0.001	0.033	0.001	0.001	0.155	0.013	0	0
90	290	290	0.322	0.03	0.107	0.028	0.172	0.012	0.005	0.035	0.057	0.156	0.05	0.367	0.218	0.098	0.031	0.049	0.061	0.041	0.024	0.181	0.058	0.096	0.019	0.019	0.347	0.018	0.119	0.129	0.106	0.152	0.1	0.126	0.023	0.097	0.042	0.112	0.115	0.094	0.005	0.001	0.031	0.001	0.001	0.253	0.001	0.006	0.011
110	290	290	0.253	0.243	0.035	0.09	0.111	0.042	0.016	0.032	0.233	0.08	0.033	0.325	0.131	0.069	0.021	0.145	0.111	0.184	0.067	0.285	0.004	0.026	0.058	0.017	0.442	0.056	0.361	0.368	0.22	0.425	0.261	0.135	0.07	0.34	0.119	0.321	0.329	0.31	0.001	0.082	0.134	0.003	0.008	0.126	0.036	0	0.009
130	290	290	0.125	0.138	0.016	0.058	0.057	0.019	0.03	0.023	0.144	0.061	0.022	0.216	0.122	0.052	0.014	0.111	0.063	0.081	0.047	0.098	0.001	0.001	0.027	0.005	0.329	0.037	0.225	0.281	0.155	0.236	0.167	0.016	0.038	0.239	0.075	0.237	0.162	0.105	0.003	0.013	0.16	0.001	0.001	0.009	0.016	0	0.001
150	290	290	0.098	0.084	0.02	0.056	0.053	0.019	0.114	0.019	0.204	0.073	0.039	0.197	0.145	0.17	0.019	0.132	0.115	0.083	0.054	0.105	0.001	0.001	0.03	0.009	0.389	0.046	0.242	0.328	0.176	0.255	0.178	0.043	0.038	0.233	0.08	0.271	0.165	0.108	0.001	0.012	0.097	0.001	0.008	0.024	0.016	0	0.021
170	290	290	0.091	0.09	0.034	0.071	0.065	0.022	0.073	0.048	0.295	0.1	0.056	0.242	0.218	0.151	0.024	0.161	0.253	0.175	0.065	0.126	0.003	0.006	0.039	0.02	0.486	0.079	0.297	0.266	0.222	0.282	0.222	0.035	0.045	0.261	0.102	0.325	0.192	0.142	0.001	0.016	0.08	0.001	0.004	0.037	0.022	0	0.004
190	290	290	0.08	0.083	0.104	0.072	0.069	0.022	0.052	0.068	0.253	0.098	0.059	0.225	0.152	0.127	0.029	0.155	0.192	0.105	0.065	0.123	0.002	0.027	0.049	0.022	0.429	0.045	0.304	0.27	0.215	0.281	0.222	0.022	0.044	0.258	0.104	0.297	0.181	0.141	0.001	0.015	0.014	0.001	0.002	0.033	0.028	0	0
210	290	290	0.068	0.08	0.15	0.067	0.057	0.021	0.067	0.031	0.197	0.084	0.051	0.194	0.124	0.116	0.027	0.147	0.184	0.093	0.062	0.113	0.003	0.01	0.025	0.029	0.264	0.042	0.271	0.258	0.196	0.264	0.205	0.017	0.043	0.24	0.099	0.269	0.172	0.135	0	0.018	0.01	0.001	0.002	0.117	0.03	0	0
230	290	290	0.061	0.074	0.163	0.066	0.054	0.021	0.014	0.034	0.137	0.071	0.048	0.167	0.126	0.127	0.028	0.138	0.281	0.097	0.063	0.122	0.004	0.002	0.018	0.011	0.075	0.038	0.244	0.257	0.184	0.255	0.188	0.012	0.043	0.235	0.095	0.26	0.167	0.147	0	0.017	0.038	0.001	0.003	0.233	0.029	0	0
250	290	290	0.049	0.089	0.097	0.064	0.068	0.021	0.017	0.035	0.112	0.066	0.047	0.147	0.109	0.136	0.025	0.125	0.288	0.101	0.058	0.132	0.003	0.001	0.02	0.009	0.05	0.034	0.217	0.246	0.17	0.243	0.173	0.015	0.036	0.234	0.106	0.247	0.162	0.131	0	0.016	0.047	0.001	0.002	0.238	0.038	0.001	0
270	290	290	0.041	0.076	0.039	0.071	0.051	0.023	0.024	0.022	0.11	0.064	0.051	0.136	0.117	0.15	0.023	0.111	0.249	0.119	0.054	0.117	0.003	0.001	0.019	0.009	0.084	0.033	0.186	0.22	0.156	0.241	0.151	0.014	0.032	0.228	0.09	0.217	0.162	0.124	0	0.011	0.043	0.001	0.001	0.211	0.056	0.001	0
290	290	290	0.038	0.065	0.056	0.074	0.061	0.024	0.025	0.029	0.103	0.061	0.051	0.144	0.135	0.211	0.023	0.101	0.259	0.136	0.049	0.105	0.002	0.002	0.016	0.011	0.091	0.032	0.16	0.198	0.128	0.22	0.131	0.009	0.03	0.22	0.071	0.194	0.168	0.113	0.001	0.002	0.041	0.001	0.001	0.175	0.029	0	0
210	310	230	0.064	0.072	0.115	0.09	0.057	0.028	0.095	0.062	0.104	0.087	0.048	0.237	0.182	0.263	0.024	0.158	0.219	0.128	0.064	0.147	0.003	0.01	0.024	0.02	0.222	0.055	0.252	0.28	0.208	0.28	0.178	0.026	0.044	0.212	0.107	0.267	0.263	0.146	0.008	0.015	0.076	0.002	0.005	0.13	0.019	0	0
230	310	230	0.068	0.065	0.163	0.099	0.064	0.029	0.1	0.097	0.103	0.086	0.051	0.226	0.194	0.343	0.025	0.164	0.278	0.137	0.069	0.144	0.004	0.007	0.025	0.017	0.189	0.051	0.256	0.296	0.229	0.3	0.18	0.019	0.047	0.237	0.109	0.293	0.324	0.159	0.008	0.021	0.086	0.002	0.005	0.16	0.027	0	0
130	310	250	0.166	0.08	0.039	0.082	0.09	0.021	0.053	0.135	0.186	0.121	0.036	0.294	0.162	0.095	0.022	0.146	0.124	0.12	0.067	0.17	0.003	0.007	0.041	0.02	0.391	0.072	0.284	0.365	0.224	0.302	0.186	0.038	0.055	0.208	0.117	0.271	0.19	0.186	0.026	0.047	0.224	0.004	0.005	0.05	0.031	0.001	0.001
150	310	250	0.095	0.083	0.036	0.077	0.062	0.028	0.081	0.042	0.2	0.134	0.045	0.291	0.177	0.267	0.022	0.16	0.139	0.111	0.067	0.207	0.003	0.007	0.032	0.015	0.411	0.067	0.291	0.413	0.221	0.279	0.193	0.039	0.045	0.211	0.115	0.29	0.198	0.167	0.009	0.016	0.167	0.002	0.005	0.12	0.022	0	0.008
170	310	250	0.068	0.068	0.043	0.079	0.046	0.032	0.086	0.03	0.161	0.114	0.047	0.243	0.156	0.277	0.022	0.159	0.157	0.115	0.063	0.185	0.002	0.007	0.027	0.029	0.352	0.062	0.272	0.294	0.201	0.262	0.187	0.043	0.042	0.207	0.109	0.299	0.185	0.143	0.003	0.011	0.108	0.002	0.003	0.131	0.016	0.005	0.006
190	310	250	0.073	0.074	0.053	0.088	0.065	0.03	0.128	0.05	0.15	0.102	0.054	0.241	0.163	0.202	0.025	0.173	0.162	0.15	0.066	0.176	0.002	0.013	0.027	0.018	0.321	0.059	0.279	0.304	0.208	0.288	0.204	0.039	0.046	0.225	0.116	0.302	0.21	0.154	0.003	0.015	0.064	0.002	0.014	0.093	0.024	0	0
210	310	250	0.083	0.081	0.082	0.099	0.079	0.035	0.169	0.045	0.119	0.092	0.068	0.229	0.165	0.189	0.029	0.18	0.176	0.14	0.071	0.168	0.003	0.013	0.027	0.022	0.283	0.054	0.292	0.318	0.217	0.318	0.213	0.039	0.048	0.249	0.119	0.311	0.242	0.161	0.003	0.022	0.041	0.002	0.008	0.098	0.044	0.005	0
230	310	250	0.072	0.071	0.098	0.102	0.067	0.044	0.155	0.043	0.098	0.082	0.063	0.204	0.149	0.176	0.03	0.174	0.244	0.119	0.069	0.151	0.004	0.01	0.023	0.023	0.205	0.054	0.26	0.306	0.194	0.299	0.197	0.03	0.047	0.249	0.112	0.299	0.224	0.151	0.002	0.022	0.031	0.002	0.004	0.155	0.042	0.002	0
250	310	250	0.06	0.078	0.083	0.111	0.087	0.052	0.101	0.046	0.087	0.073	0.054	0.183	0.136	0.172	0.025	0.156	0.294	0.113	0.064	0.139	0.007	0.006	0.02	0.018	0.133	0.045	0.226	0.279	0.167	0.28	0.172	0.021	0.047	0.241	0.11	0.276	0.201	0.142	0.004	0.017	0.035	0.001	0.002	0.2	0.029	0	0
270	310	250	0.038	0.062	0.062	0.088	0.042	0.048	0.046	0.025	0.063	0.058	0.044	0.146	0.118	0.142	0.019	0.121	0.305	0.109	0.051	0.121	0.01	0.004	0.015	0.016	0.097	0.035	0.168	0.213	0.121	0.22	0.126	0.011	0.037	0.206	0.095	0.23	0.15	0.111	0.004	0.007	0.028	0.001	0.001	0.188	0.012	0	0
110	310	270	0.348	0.114	0.104	0.155	0.128	0.055	0.026	0.245	0.143	0.124	0.038	0.345	0.25	0.112	0.02	0.149	0.179	0.131	0.085	0.307	0.011	0.014	0.046	0.048	0.366	0.132	0.396	0.404	0.287	0.538	0.302	0.111	0.118	0.355	0.238	0.294	0.322	0.367	0.05	0.498	0.273	0.009	0.007	0.068	0.032	0	0.023
130	310	270	0.128	0.106	0.03	0.088	0.069	0.026	0.051	0.1	0.173	0.145	0.038	0.353	0.201	0.114	0.018	0.169	0.155	0.112	0.08	0.161	0.003	0.001	0.037	0.01	0.536	0.054	0.355	0.399	0.271	0.331	0.238	0.038	0.059	0.267	0.126	0.338	0.229	0.173	0.015	0.028	0.349	0.002	0.004	0.028	0.037	0	0.002
150	310	270	0.105	0.095	0.03	0.089	0.063	0.034	0.062	0.071	0.219	0.147	0.046	0.304	0.245	0.465	0.022	0.195	0.174	0.109	0.085	0.212	0.002	0.006	0.03	0.013	0.558	0.059	0.389	0.485	0.278	0.339	0.264	0.043	0.058	0.291	0.141	0.374	0.246	0.18	0.003	0.027	0.218	0.002	0.017	0.165	0.039	0.004	0.04
170	310	270	0.092	0.096	0.03	0.086	0.061	0.029	0.083	0.058	0.277	0.124	0.049	0.243	0.212	0.473	0.021	0.195	0.186	0.107	0.081	0.168	0.003	0.001	0.031	0.02	0.495	0.055	0.358	0.355	0.248	0.323	0.254	0.03	0.052	0.283	0.137	0.392	0.231	0.168	0.001	0.023	0.132	0.002	0.007	0.209	0.03	0.002	0.028
190	310	270	0.084	0.076	0.036	0.09	0.08	0.031	0.127	0.075	0.183	0.104	0.045	0.22	0.184	0.292	0.021	0.188	0.194	0.115	0.073	0.171	0.002	0.003	0.047	0.014	0.417	0.058	0.341	0.332	0.241	0.321	0.251	0.045	0.051	0.28	0.13	0.345	0.231	0.165	0.001	0.022	0.067	0.001	0.014	0.126	0.046	0	0
210	310	270	0.074	0.07	0.07	0.087	0.076	0.029	0.2	0.039	0.117	0.089	0.049	0.21	0.132	0.15	0.025	0.169	0.155	0.104	0.069	0.153	0.003	0.006	0.021	0.024	0.322	0.047	0.304	0.312	0.228	0.309	0.236	0.041	0.046	0.266	0.119	0.308	0.219	0.163	0.001	0.021	0.012	0.001	0.005	0.064	0.05	0.007	0
230	310	270	0.062	0.072	0.085	0.092	0.059	0.036	0.176	0.025	0.106	0.077	0.051	0.178	0.127	0.141	0.027	0.181	0.221	0.108	0.071	0.153	0.006	0.004	0.02	0.024	0.176	0.046	0.278	0.311	0.208	0.306	0.219	0.039	0.05	0.26	0.115	0.304	0.207	0.149	0.001	0.023	0.02	0.002	0.004	0.172	0.047	0.027	0
250	310	270	0.056	0.088	0.063	0.09	0.087	0.044	0.1	0.037	0.1	0.072	0.051	0.164	0.123	0.152	0.026	0.158	0.281	0.11	0.063	0.144	0.005	0.003	0.02	0.015	0.123	0.04	0.229	0.27	0.168	0.286	0.181	0.029	0.042	0.243	0.108	0.267	0.186	0.137	0.001	0.02	0.031	0.001	0.002	0.22	0.047	0	0
270	310	270	0.05	0.085	0.043	0.086	0.06	0.038	0.055	0.031	0.088	0.065	0.048	0.154	0.118	0.153	0.02	0.133	0.313	0.117	0.058	0.13	0.004	0.005	0.019	0.014	0.118	0.038	0.194	0.245	0.144	0.264	0.153	0.017	0.036	0.238	0.108	0.239	0.168	0.123	0.001	0.014	0.029	0.001	0.001	0.211	0.041	0	0
290	310	270	0.043	0.066	0.038	0.085	0.053	0.03	0.035	0.034	0.079	0.059	0.046	0.136	0.116	0.147	0.018	0.111	0.32	0.126	0.054	0.115	0.003	0.004	0.016	0.013	0.095	0.033	0.177	0.225	0.127	0.251	0.135	0.012	0.034	0.237	0.081	0.222	0.163	0.113	0.001	0.005	0.023	0.001	0.001	0.199	0.029	0	0
90	310	290	0.295	0.046	0.184	0.061	0.098	0.039	0.01	0.171	0.073	0.084	0.042	0.403	0.266	0.151	0.016	0.066	0.203	0.095	0.084	0.156	0.074	0.041	0.027	0.02	0.21	0.028	0.197	0.166	0.142	0.219	0.139	0.227	0.044	0.163	0.118	0.134	0.229	0.098	0.107	0.009	0.091	0.002	0.006	0.11	0.007	0	0.013
110	310	290	0.326	0.091	0.076	0.131	0.11	0.034	0.051	0.295	0.172	0.086	0.028	0.345	0.17	0.079	0.018	0.147	0.175	0.107	0.114	0.162	0.003	0.004	0.06	0.018	0.272	0.065	0.351	0.359	0.239	0.351	0.277	0.119	0.064	0.3	0.157	0.309	0.268	0.188	0.046	0.045	0.226	0.002	0.009	0.049	0.055	0	0
130	310	290	0.108	0.092	0.025	0.077	0.058	0.024	0.065	0.073	0.149	0.095	0.031	0.301	0.198	0.111	0.015	0.162	0.13	0.097	0.07	0.131	0.003	0.002	0.033	0.007	0.442	0.079	0.323	0.356	0.236	0.302	0.242	0.032	0.059	0.268	0.108	0.315	0.211	0.128	0.027	0.023	0.295	0.001	0.003	0.014	0.025	0	0.002
150	310	290	0.088	0.085	0.027	0.082	0.057	0.036	0.147	0.076	0.247	0.099	0.043	0.275	0.208	0.322	0.018	0.184	0.214	0.105	0.077	0.15	0.003	0.002	0.03	0.011	0.503	0.074	0.364	0.456	0.255	0.33	0.27	0.027	0.063	0.289	0.125	0.363	0.22	0.158	0.005	0.028	0.196	0.002	0.005	0.097	0.027	0.002	0.023
170	310	290	0.086	0.114	0.03	0.085	0.056	0.027	0.133	0.092	0.284	0.105	0.047	0.265	0.217	0.232	0.02	0.189	0.277	0.118	0.08	0.147	0.006	0	0.068	0.027	0.526	0.087	0.344	0.338	0.261	0.324	0.263	0.028	0.062	0.269	0.131	0.389	0.224	0.171	0.001	0.023	0.168	0.001	0.004	0.131	0.025	0.001	0.007
190	310	290	0.082	0.059	0.053	0.093	0.066	0.027	0.13	0.132	0.219	0.101	0.048	0.261	0.205	0.133	0.021	0.19	0.28	0.106	0.078	0.146	0.007	0.002	0.029	0.014	0.452	0.061	0.354	0.346	0.251	0.331	0.275	0.045	0.055	0.29	0.132	0.371	0.23	0.168	0.001	0.023	0.054	0.001	0.004	0.056	0.036	0	0
210	310	290	0.068	0.053	0.153	0.08	0.06	0.024	0.205	0.044	0.132	0.088	0.046	0.217	0.123	0.12	0.025	0.162	0.179	0.089	0.069	0.131	0.003	0.006	0.019	0.02	0.307	0.047	0.305	0.307	0.231	0.305	0.241	0.04	0.047	0.268	0.115	0.312	0.202	0.144	0.001	0.019	0.007	0.001	0.002	0.089	0.041	0	0
230	310	290	0.058	0.059	0.169	0.077	0.058	0.025	0.052	0.025	0.101	0.075	0.045	0.176	0.116	0.133	0.026	0.153	0.249	0.089	0.068	0.133	0.006	0.001	0.019	0.015	0.097	0.04	0.276	0.307	0.206	0.301	0.225	0.036	0.05	0.268	0.11	0.295	0.194	0.139	0.001	0.02	0.017	0.001	0.003	0.205	0.041	0	0
250	310	290	0.054	0.07	0.069	0.079	0.125	0.028	0.039	0.032	0.088	0.066	0.046	0.156	0.108	0.138	0.024	0.139	0.247	0.103	0.064	0.13	0.005	0.001	0.019	0.011	0.057	0.041	0.246	0.284	0.18	0.286	0.201	0.03	0.039	0.255	0.111	0.274	0.187	0.134	0.001	0.02	0.028	0.001	0.014	0.254	0.046	0.014	0
270	310	290	0.048	0.071	0.031	0.08	0.087	0.03	0.042	0.017	0.065	0.063	0.048	0.147	0.113	0.147	0.022	0.122	0.258	0.111	0.058	0.12	0.002	0.001	0.019	0.009	0.103	0.036	0.202	0.245	0.154	0.268	0.17	0.027	0.034	0.246	0.109	0.243	0.168	0.125	0.001	0.015	0.04	0.002	0.003	0.228	0.071	0.005	0
290	310	290	0.042	0.058	0.027	0.077	0.061	0.027	0.034	0.023	0.061	0.057	0.044	0.137	0.11	0.167	0.018	0.105	0.305	0.143	0.052	0.109	0.002	0.002	0.016	0.009	0.112	0.034	0.174	0.213	0.13	0.245	0.142	0.013	0.03	0.237	0.077	0.216	0.153	0.107	0.001	0.005	0.046	0.001	0.001	0.206	0.055	0	0
310	310	290	0.035	0.051	0.026	0.07	0.052	0.026	0.024	0.027	0.06	0.052	0.043	0.125	0.106	0.179	0.017	0.095	0.301	0.164	0.048	0.102	0.002	0.002	0.015	0.004	0.088	0.031	0.149	0.19	0.114	0.222	0.122	0.008	0.028	0.223	0.07	0.189	0.149	0.1	0.001	0	0.028	0	0.001	0.178	0.033	0	0
130	330	210	0.234	0.075	0.267	0.166	0.135	0.287	0.21	0.392	0.158	0.201	0.086	0.668	0.503	0.721	0.055	0.26	0.78	0.139	0.113	0.676	0.004	0.008	0.067	0.059	0.14	0.099	0.522	0.528	0.457	0.505	0.428	0.068	0.094	0.439	0.292	0.534	0.526	0.456	0.251	0.025	0.259	0.002	0.018	0.266	0.021	0.013	0.001
150	330	210	0.165	0.078	0.188	0.157	0.123	0.156	0.309	0.243	0.173	0.198	0.087	0.567	0.44	0.394	0.053	0.262	0.486	0.155	0.109	0.426	0.007	0.005	0.055	0.033	0.388	0.113	0.504	0.561	0.462	0.496	0.364	0.061	0.095	0.388	0.231	0.493	0.503	0.328	0.107	0.027	0.279	0.002	0.005	0.266	0.03	0.02	0.003
170	330	210	0.131	0.079	0.111	0.145	0.106	0.198	0.379	0.152	0.131	0.155	0.075	0.477	0.401	0.297	0.041	0.252	0.479	0.167	0.102	0.272	0.006	0.003	0.048	0.032	0.476	0.171	0.459	0.508	0.372	0.472	0.325	0.052	0.091	0.356	0.186	0.474	0.414	0.273	0.057	0.026	0.295	0.002	0.009	0.16	0.025	0.013	0
190	330	210	0.102	0.06	0.115	0.147	0.09	0.212	0.277	0.125	0.099	0.129	0.069	0.385	0.329	0.296	0.033	0.233	0.384	0.136	0.09	0.224	0.006	0.005	0.035	0.023	0.38	0.093	0.404	0.394	0.335	0.414	0.272	0.044	0.069	0.322	0.161	0.411	0.345	0.251	0.03	0.028	0.244	0.002	0.009	0.128	0.02	0.004	0
210	330	210	0.083	0.059	0.198	0.128	0.08	0.052	0.149	0.147	0.114	0.126	0.071	0.33	0.331	0.542	0.035	0.222	0.373	0.127	0.087	0.2	0.004	0.004	0.035	0.024	0.257	0.075	0.352	0.38	0.276	0.388	0.237	0.034	0.058	0.297	0.147	0.382	0.415	0.216	0.018	0.025	0.208	0.002	0.005	0.191	0.018	0	0
230	330	210	0.072	0.06	0.187	0.13	0.084	0.033	0.086	0.152	0.121	0.106	0.058	0.266	0.291	0.445	0.029	0.218	0.389	0.124	0.087	0.174	0.004	0.004	0.032	0.031	0.156	0.069	0.314	0.35	0.207	0.371	0.209	0.024	0.056	0.281	0.132	0.365	0.37	0.191	0.008	0.027	0.134	0.002	0.007	0.161	0.022	0.015	0
130	330	230	0.189	0.061	0.226	0.172	0.133	0.045	0.142	0.437	0.192	0.206	0.067	0.573	0.379	0.354	0.043	0.254	0.529	0.145	0.111	0.286	0.004	0.009	0.06	0.036	0.26	0.097	0.491	0.547	0.4	0.478	0.363	0.058	0.079	0.385	0.319	0.503	0.436	0.262	0.19	0.033	0.253	0.003	0.005	0.204	0.032	0.005	0
150	330	230	0.167	0.103	0.148	0.15	0.147	0.06	0.221	0.191	0.208	0.209	0.071	0.502	0.34	0.341	0.037	0.267	0.402	0.167	0.109	0.278	0.004	0.008	0.056	0.032	0.455	0.1	0.484	0.585	0.383	0.481	0.334	0.068	0.083	0.371	0.209	0.486	0.443	0.261	0.065	0.037	0.275	0.002	0.007	0.218	0.042	0.014	0.001
170	330	230	0.137	0.097	0.118	0.144	0.109	0.176	0.316	0.14	0.187	0.161	0.072	0.424	0.361	0.362	0.032	0.271	0.418	0.174	0.106	0.271	0.004	0.006	0.049	0.038	0.493	0.174	0.474	0.555	0.341	0.482	0.329	0.047	0.079	0.374	0.193	0.501	0.388	0.245	0.018	0.037	0.264	0.002	0.024	0.185	0.033	0.006	0
190	330	230	0.11	0.073	0.097	0.136	0.092	0.132	0.245	0.118	0.167	0.128	0.069	0.361	0.303	0.37	0.028	0.244	0.359	0.171	0.098	0.219	0.004	0.004	0.04	0.026	0.437	0.092	0.426	0.441	0.292	0.435	0.294	0.041	0.07	0.347	0.175	0.441	0.345	0.213	0.007	0.031	0.215	0.002	0.015	0.172	0.03	0.007	0
210	330	230	0.092	0.064	0.115	0.133	0.101	0.04	0.195	0.129	0.136	0.116	0.068	0.298	0.263	0.358	0.032	0.228	0.33	0.138	0.089	0.19	0.004	0.006	0.032	0.027	0.306	0.08	0.365	0.397	0.251	0.403	0.253	0.037	0.064	0.317	0.153	0.403	0.34	0.199	0.006	0.029	0.127	0.002	0.008	0.161	0.034	0	0
230	330	230	0.076	0.06	0.14	0.13	0.094	0.037	0.184	0.103	0.095	0.101	0.064	0.254	0.223	0.312	0.032	0.201	0.343	0.126	0.083	0.169	0.004	0.005	0.028	0.029	0.178	0.063	0.319	0.357	0.219	0.366	0.226	0.032	0.059	0.297	0.138	0.373	0.327	0.191	0.006	0.026	0.078	0.002	0.006	0.154	0.032	0.001	0
250	330	230	0.056	0.051	0.113	0.135	0.081	0.039	0.153	0.068	0.076	0.082	0.054	0.202	0.197	0.223	0.026	0.166	0.35	0.106	0.072	0.147	0.006	0.003	0.022	0.035	0.121	0.051	0.252	0.293	0.171	0.307	0.183	0.023	0.05	0.26	0.119	0.322	0.246	0.156	0.005	0.014	0.053	0.002	0.003	0.175	0.019	0.003	0
110	330	250	0.269	0.046	0.282	0.163	0.129	0.037	0.026	0.675	0.073	0.187	0.056	0.542	0.29	0.336	0.046	0.237	0.506	0.136	0.111	0.337	0.006	0.008	0.066	0.036	0.106	0.093	0.509	0.533	0.368	0.459	0.381	0.07	0.088	0.386	0.297	0.48	0.458	0.236	0.309	0.026	0.225	0.002	0.021	0.167	0.028	0.002	0
130	330	250	0.174	0.056	0.09	0.208	0.176	0.045	0.223	0.263	0.192	0.213	0.061	0.504	0.291	0.17	0.04	0.254	0.342	0.143	0.106	0.256	0.003	0.008	0.053	0.026	0.423	0.086	0.487	0.535	0.363	0.45	0.327	0.075	0.075	0.366	0.228	0.477	0.353	0.25	0.098	0.042	0.224	0.002	0.007	0.103	0.052	0.005	0
150	330	250	0.154	0.098	0.058	0.142	0.127	0.062	0.192	0.095	0.206	0.198	0.069	0.426	0.298	0.249	0.04	0.265	0.267	0.159	0.105	0.316	0.003	0.009	0.049	0.031	0.53	0.101	0.464	0.576	0.352	0.448	0.327	0.086	0.081	0.358	0.19	0.469	0.375	0.286	0.02	0.038	0.249	0.002	0.009	0.155	0.055	0.026	0.001
170	330	250	0.128	0.092	0.049	0.134	0.087	0.177	0.26	0.073	0.184	0.171	0.07	0.38	0.304	0.392	0.032	0.267	0.323	0.169	0.104	0.265	0.003	0.004	0.062	0.029	0.539	0.127	0.464	0.536	0.327	0.46	0.34	0.057	0.073	0.365	0.186	0.509	0.34	0.241	0.005	0.034	0.226	0.002	0.014	0.209	0.043	0.01	0
190	330	250	0.104	0.072	0.05	0.128	0.086	0.066	0.242	0.1	0.166	0.128	0.067	0.335	0.26	0.403	0.028	0.241	0.291	0.173	0.092	0.203	0.003	0.004	0.039	0.02	0.455	0.079	0.395	0.418	0.282	0.425	0.292	0.042	0.065	0.333	0.166	0.442	0.292	0.199	0.003	0.03	0.154	0.002	0.007	0.209	0.038	0.002	0
210	330	250	0.091	0.065	0.06	0.128	0.096	0.046	0.248	0.091	0.117	0.112	0.09	0.275	0.223	0.226	0.038	0.217	0.234	0.14	0.084	0.187	0.002	0.01	0.028	0.025	0.303	0.07	0.35	0.385	0.252	0.378	0.27	0.054	0.06	0.314	0.147	0.389	0.279	0.19	0.003	0.029	0.064	0.002	0.01	0.114	0.047	0.001	0
230	330	250	0.08	0.062	0.082	0.128	0.086	0.043	0.228	0.044	0.087	0.098	0.074	0.225	0.183	0.19	0.034	0.193	0.255	0.119	0.079	0.168	0.004	0.007	0.024	0.028	0.211	0.059	0.307	0.345	0.219	0.349	0.236	0.042	0.056	0.3	0.133	0.352	0.251	0.175	0.002	0.024	0.032	0.002	0.003	0.141	0.045	0	0
250	330	250	0.069	0.072	0.076	0.117	0.102	0.057	0.178	0.042	0.098	0.081	0.059	0.191	0.162	0.186	0.028	0.175	0.31	0.115	0.074	0.162	0.006	0.004	0.023	0.028	0.127	0.048	0.269	0.317	0.186	0.326	0.206	0.03	0.053	0.287	0.123	0.319	0.228	0.16	0.002	0.022	0.028	0.002	0.004	0.194	0.037	0.005	0
270	330	250	0.057	0.077	0.053	0.125	0.069	0.072	0.09	0.033	0.082	0.068	0.052	0.166	0.144	0.171	0.02	0.156	0.353	0.113	0.067	0.156	0.009	0.004	0.02	0.031	0.116	0.042	0.226	0.286	0.158	0.301	0.175	0.021	0.052	0.272	0.13	0.287	0.2	0.143	0.004	0.017	0.031	0.001	0.002	0.229	0.034	0	0
290	330	250	0.044	0.069	0.039	0.106	0.055	0.054	0.045	0.033	0.075	0.059	0.049	0.146	0.134	0.166	0.018	0.134	0.377	0.113	0.06	0.152	0.013	0.003	0.017	0.031	0.09	0.039	0.191	0.242	0.134	0.277	0.147	0.013	0.044	0.258	0.09	0.255	0.183	0.131	0.004	0.008	0.026	0.001	0.001	0.237	0.019	0	0
110	330	270	0.191	0.036	0.194	0.145	0.107	0.039	0.059	0.584	0.08	0.139	0.047	0.475	0.263	0.119	0.026	0.214	0.402	0.101	0.104	0.246	0.003	0.003	0.048	0.017	0.25	0.066	0.486	0.533	0.342	0.429	0.376	0.084	0.075	0.359	0.259	0.434	0.385	0.207	0.137	0.051	0.25	0.003	0.029	0.044	0.039	0	0
130	330	270	0.152	0.054	0.047	0.151	0.188	0.043	0.131	0.17	0.113	0.197	0.055	0.475	0.244	0.159	0.025	0.235	0.254	0.115	0.104	0.221	0.003	0.004	0.042	0.012	0.604	0.067	0.496	0.527	0.349	0.445	0.346	0.08	0.081	0.381	0.199	0.454	0.369	0.217	0.046	0.034	0.308	0.002	0.005	0.025	0.049	0.004	0
150	330	270	0.133	0.07	0.035	0.14	0.1	0.068	0.156	0.084	0.111	0.182	0.056	0.386	0.311	0.307	0.024	0.251	0.231	0.13	0.105	0.245	0.004	0.003	0.04	0.014	0.624	0.08	0.509	0.581	0.36	0.451	0.363	0.081	0.084	0.391	0.193	0.465	0.378	0.236	0.014	0.032	0.293	0.002	0.007	0.123	0.062	0.044	0.001
170	330	270	0.111	0.068	0.035	0.119	0.074	0.101	0.187	0.061	0.136	0.166	0.06	0.338	0.283	0.581	0.022	0.245	0.283	0.132	0.101	0.213	0.003	0.001	0.077	0.021	0.59	0.076	0.461	0.51	0.317	0.417	0.347	0.046	0.067	0.381	0.171	0.496	0.333	0.222	0.002	0.026	0.246	0.001	0.011	0.271	0.042	0.011	0
190	330	270	0.093	0.051	0.034	0.111	0.064	0.04	0.17	0.113	0.114	0.123	0.056	0.29	0.261	0.392	0.022	0.224	0.273	0.163	0.091	0.187	0.003	0.001	0.062	0.017	0.502	0.062	0.395	0.395	0.279	0.384	0.307	0.043	0.06	0.351	0.155	0.429	0.306	0.198	0.001	0.027	0.135	0.002	0.005	0.196	0.041	0.007	0
210	330	270	0.081	0.042	0.047	0.103	0.081	0.047	0.214	0.086	0.087	0.099	0.061	0.234	0.191	0.158	0.026	0.2	0.24	0.12	0.082	0.177	0.002	0.003	0.022	0.016	0.326	0.065	0.348	0.37	0.25	0.369	0.285	0.053	0.056	0.322	0.141	0.38	0.266	0.185	0.001	0.03	0.032	0.001	0.019	0.067	0.053	0.001	0
230	330	270	0.075	0.06	0.077	0.11	0.073	0.04	0.212	0.028	0.093	0.084	0.06	0.188	0.151	0.153	0.029	0.194	0.237	0.111	0.077	0.164	0.006	0.002	0.02	0.024	0.193	0.056	0.309	0.338	0.212	0.348	0.244	0.052	0.066	0.294	0.128	0.345	0.238	0.164	0.001	0.025	0.018	0.002	0.004	0.148	0.053	0.009	0
250	330	270	0.064	0.072	0.053	0.103	0.095	0.053	0.134	0.032	0.1	0.078	0.059	0.163	0.138	0.161	0.027	0.175	0.277	0.11	0.069	0.165	0.006	0.002	0.02	0.024	0.107	0.045	0.267	0.308	0.182	0.323	0.212	0.04	0.05	0.275	0.117	0.309	0.216	0.151	0.002	0.022	0.024	0.001	0.004	0.217	0.052	0.007	0
270	330	270	0.054	0.081	0.035	0.091	0.064	0.047	0.085	0.026	0.072	0.067	0.05	0.153	0.13	0.17	0.02	0.142	0.319	0.105	0.062	0.15	0.004	0.003	0.018	0.019	0.131	0.039	0.221	0.273	0.153	0.293	0.176	0.027	0.039	0.259	0.122	0.268	0.19	0.132	0.002	0.019	0.03	0.001	0.002	0.24	0.045	0.001	0
290	330	270	0.044	0.079	0.028	0.085	0.052	0.035	0.04	0.032	0.082	0.058	0.048	0.145	0.123	0.189	0.017	0.114	0.357	0.108	0.058	0.125	0.003	0.003	0.016	0.017	0.132	0.036	0.19	0.239	0.133	0.267	0.149	0.015	0.034	0.255	0.086	0.239	0.172	0.119	0.001	0.01	0.026	0.001	0.001	0.238	0.035	0	0
310	330	270	0.034	0.059	0.025	0.072	0.051	0.029	0.028	0.032	0.07	0.052	0.045	0.119	0.112	0.168	0.016	0.102	0.331	0.119	0.052	0.108	0.002	0.003	0.014	0.007	0.104	0.032	0.162	0.211	0.116	0.24	0.128	0.01	0.03	0.241	0.076	0.206	0.159	0.11	0.001	0	0.016	0	0.001	0.203	0.022	0	0
90	330	290	0.44	0.043	0.276	0.129	0.131	0.041	0.008	0.606	0.103	0.069	0.031	0.464	0.2	0.113	0.016	0.193	0.493	0.159	0.157	0.234	0.005	0.005	0.052	0.024	0.056	0.048	0.455	0.597	0.349	0.417	0.392	0.288	0.074	0.355	0.363	0.37	0.359	0.195	0.401	0.024	0.265	0.002	0.011	0.043	0.019	0	0.01
110	330	290	0.197	0.033	0.137	0.181	0.108	0.041	0.059	0.554	0.134	0.104	0.035	0.479	0.219	0.094	0.021	0.207	0.333	0.101	0.115	0.206	0.002	0.005	0.044	0.02	0.255	0.066	0.476	0.504	0.338	0.423	0.39	0.128	0.073	0.372	0.328	0.437	0.339	0.193	0.154	0.029	0.266	0.001	0.004	0.005	0.032	0.004	0
130	330	290	0.131	0.048	0.038	0.127	0.177	0.045	0.082	0.167	0.115	0.156	0.047	0.447	0.234	0.116	0.021	0.23	0.241	0.111	0.098	0.218	0.003	0.008	0.039	0.009	0.618	0.173	0.504	0.526	0.352	0.462	0.362	0.055	0.098	0.394	0.18	0.481	0.363	0.202	0.063	0.031	0.336	0.001	0.005	0.016	0.039	0.014	0
150	330	290	0.115	0.052	0.035	0.127	0.087	0.06	0.268	0.094	0.105	0.132	0.047	0.359	0.311	0.332	0.02	0.245	0.234	0.109	0.098	0.213	0.007	0.002	0.034	0.013	0.62	0.098	0.52	0.551	0.341	0.433	0.373	0.064	0.087	0.4	0.174	0.465	0.348	0.208	0.014	0.036	0.28	0.002	0.028	0.092	0.047	0.034	0
170	330	290	0.102	0.058	0.03	0.102	0.067	0.04	0.22	0.095	0.129	0.116	0.049	0.3	0.249	0.358	0.018	0.21	0.282	0.11	0.088	0.176	0.005	0.001	0.025	0.03	0.553	0.064	0.401	0.44	0.29	0.365	0.329	0.039	0.066	0.336	0.149	0.42	0.282	0.182	0.001	0.021	0.243	0.001	0.009	0.169	0.037	0.003	0
190	330	290	0.081	0.036	0.034	0.115	0.065	0.031	0.269	0.164	0.098	0.113	0.049	0.301	0.24	0.128	0.019	0.214	0.328	0.116	0.089	0.173	0.004	0.001	0.021	0.021	0.499	0.058	0.408	0.384	0.282	0.379	0.318	0.049	0.067	0.344	0.153	0.415	0.275	0.191	0.001	0.038	0.11	0.001	0.005	0.082	0.037	0.006	0
210	330	290	0.075	0.042	0.078	0.094	0.075	0.032	0.227	0.068	0.1	0.084	0.048	0.216	0.142	0.114	0.02	0.182	0.207	0.093	0.077	0.154	0.002	0.002	0.017	0.02	0.32	0.046	0.35	0.349	0.247	0.348	0.274	0.05	0.05	0.317	0.132	0.361	0.236	0.164	0.001	0.03	0.017	0.001	0.004	0.054	0.049	0.001	0
230	330	290	0.06	0.062	0.113	0.09	0.077	0.029	0.116	0.024	0.123	0.075	0.049	0.162	0.125	0.127	0.024	0.162	0.194	0.089	0.071	0.141	0.006	0.001	0.017	0.019	0.123	0.041	0.3	0.32	0.208	0.322	0.238	0.045	0.052	0.289	0.119	0.321	0.215	0.149	0.001	0.019	0.007	0.001	0.003	0.153	0.051	0.001	0
250	330	290	0.051	0.053	0.044	0.092	0.081	0.03	0.047	0.024	0.092	0.065	0.046	0.133	0.113	0.131	0.02	0.149	0.246	0.1	0.067	0.13	0.005	0.001	0.016	0.017	0.04	0.042	0.262	0.301	0.181	0.308	0.215	0.036	0.045	0.276	0.115	0.299	0.201	0.146	0.001	0.02	0.015	0.003	0.004	0.236	0.069	0.009	0
270	330	290	0.054	0.052	0.021	0.08	0.063	0.028	0.052	0.017	0.051	0.061	0.048	0.141	0.118	0.117	0.016	0.124	0.367	0.092	0.062	0.121	0.002	0.001	0.016	0.012	0.069	0.036	0.225	0.271	0.156	0.28	0.174	0.019	0.035	0.266	0.122	0.272	0.176	0.136	0.006	0.018	0.036	0.001	0.003	0.28	0.128	0.019	0
290	330	290	0.039	0.058	0.018	0.072	0.048	0.029	0.026	0.019	0.054	0.055	0.047	0.125	0.114	0.145	0.017	0.108	0.396	0.123	0.057	0.111	0.002	0.001	0.013	0.01	0.105	0.035	0.19	0.23	0.132	0.247	0.151	0.01	0.032	0.259	0.082	0.242	0.163	0.121	0.001	0.008	0.028	0.001	0.001	0.27	0.068	0.002	0
310	330	290	0.032	0.051	0.016	0.066	0.043	0.027	0.014	0.019	0.049	0.05	0.044	0.095	0.098	0.141	0.015	0.096	0.35	0.115	0.053	0.1	0.002	0.001	0.012	0.005	0.088	0.035	0.164	0.203	0.12	0.223	0.133	0.009	0.029	0.242	0.074	0.206	0.153	0.104	0	0	0.012	0	0.001	0.228	0.038	0.001	0
330	330	290	0.028	0.045	0.015	0.063	0.045	0.02	0.005	0.014	0.034	0.041	0.042	0.061	0.064	0.115	0.014	0.1	0.277	0.141	0.046	0.093	0.001	0.001	0.009	0.003	0.042	0.039	0.141	0.185	0.106	0.199	0.115	0.002	0.028	0.229	0.066	0.193	0.139	0.095	0	0	0.009	0	0.01	0.176	0.019	0.003	0
130	350	190	0.248	0.096	0.359	0.187	0.163	0.127	0.399	0.346	0.11	0.262	0.092	0.728	0.531	0.703	0.068	0.292	0.786	0.195	0.123	0.461	0.009	0.014	0.078	0.055	0.097	0.147	0.646	0.581	0.54	0.59	0.619	0.226	0.108	0.499	0.269	0.563	0.721	0.43	0.191	0.026	0.251	0.002	0.011	0.291	0.032	0	0
150	350	190	0.216	0.066	0.279	0.206	0.148	0.097	0.528	0.227	0.099	0.25	0.104	0.649	0.503	0.567	0.064	0.315	0.604	0.149	0.125	0.476	0.004	0.012	0.081	0.047	0.1	0.095	0.627	0.632	0.517	0.59	0.483	0.106	0.101	0.484	0.252	0.61	0.72	0.37	0.113	0.033	0.262	0.002	0.01	0.31	0.038	0.004	0
170	350	190	0.173	0.051	0.196	0.203	0.151	0.074	0.585	0.162	0.09	0.22	0.108	0.52	0.448	0.439	0.055	0.315	0.401	0.152	0.122	0.354	0.005	0.008	0.068	0.037	0.182	0.093	0.58	0.665	0.524	0.573	0.416	0.089	0.096	0.463	0.244	0.62	0.525	0.339	0.051	0.034	0.222	0.002	0.012	0.286	0.046	0.004	0
190	350	190	0.134	0.065	0.217	0.2	0.139	0.058	0.358	0.163	0.123	0.184	0.108	0.455	0.448	0.559	0.054	0.308	0.378	0.148	0.113	0.262	0.008	0.007	0.058	0.037	0.258	0.095	0.484	0.51	0.405	0.53	0.338	0.059	0.086	0.411	0.207	0.565	0.471	0.29	0.026	0.034	0.259	0.002	0.013	0.266	0.036	0	0
210	350	190	0.095	0.054	0.242	0.133	0.098	0.039	0.154	0.155	0.13	0.14	0.082	0.332	0.431	0.651	0.043	0.263	0.348	0.14	0.093	0.22	0.005	0.005	0.048	0.049	0.17	0.088	0.37	0.403	0.251	0.424	0.253	0.038	0.066	0.331	0.166	0.443	0.438	0.228	0.016	0.023	0.226	0.002	0.019	0.185	0.019	0.008	0
230	350	190	0.085	0.047	0.13	0.136	0.086	0.033	0.084	0.11	0.095	0.098	0.057	0.201	0.302	0.353	0.034	0.299	0.26	0.161	0.095	0.199	0.005	0.004	0.05	0.072	0.125	0.096	0.322	0.378	0.22	0.425	0.23	0.056	0.067	0.305	0.148	0.449	0.299	0.212	0.007	0.022	0.094	0.002	0.015	0.116	0.024	0.027	0
110	350	210	0.432	0.15	0.512	0.231	0.213	0.069	0.123	0.734	0.24	0.263	0.103	0.893	0.551	0.766	0.064	0.304	0.921	0.237	0.135	0.48	0.009	0.015	0.082	0.071	0.257	0.14	0.697	0.64	0.683	0.648	0.737	0.403	0.124	0.581	0.317	0.624	0.864	0.406	0.288	0.031	0.292	0.002	0.009	0.387	0.02	0.003	0
130	350	210	0.298	0.11	0.36	0.23	0.18	0.07	0.28	0.506	0.154	0.283	0.095	0.719	0.533	0.673	0.062	0.337	0.784	0.16	0.137	0.388	0.006	0.015	0.081	0.045	0.132	0.108	0.724	0.663	0.562	0.631	0.649	0.158	0.118	0.582	0.319	0.7	0.765	0.375	0.231	0.041	0.279	0.002	0.013	0.327	0.037	0.004	0
150	350	210	0.231	0.058	0.22	0.205	0.163	0.064	0.321	0.244	0.087	0.254	0.108	0.578	0.471	0.447	0.059	0.32	0.53	0.136	0.13	0.328	0.004	0.009	0.076	0.036	0.195	0.109	0.635	0.653	0.46	0.588	0.45	0.107	0.105	0.518	0.268	0.648	0.581	0.319	0.176	0.037	0.261	0.002	0.011	0.222	0.052	0.031	0
170	350	210	0.176	0.048	0.154	0.18	0.139	0.065	0.311	0.184	0.069	0.203	0.104	0.465	0.42	0.382	0.05	0.301	0.398	0.139	0.119	0.253	0.004	0.007	0.067	0.034	0.342	0.082	0.539	0.633	0.388	0.531	0.376	0.066	0.096	0.45	0.223	0.576	0.464	0.285	0.065	0.038	0.264	0.002	0.009	0.162	0.044	0	0.002
190	350	210	0.139	0.047	0.184	0.187	0.125	0.079	0.374	0.158	0.101	0.165	0.094	0.441	0.399	0.526	0.044	0.287	0.427	0.153	0.112	0.243	0.005	0.007	0.051	0.033	0.379	0.092	0.476	0.481	0.333	0.491	0.328	0.053	0.079	0.408	0.193	0.532	0.528	0.262	0.024	0.04	0.282	0.002	0.008	0.157	0.053	0	0
210	350	210	0.112	0.049	0.185	0.16	0.101	0.068	0.276	0.177	0.118	0.142	0.084	0.389	0.352	0.56	0.044	0.255	0.434	0.136	0.105	0.225	0.005	0.005	0.047	0.034	0.341	0.074	0.428	0.445	0.281	0.471	0.29	0.046	0.071	0.376	0.173	0.489	0.45	0.241	0.012	0.031	0.22	0.002	0.005	0.209	0.032	0	0
230	350	210	0.086	0.05	0.142	0.176	0.095	0.043	0.182	0.152	0.119	0.121	0.074	0.298	0.31	0.393	0.039	0.226	0.423	0.126	0.095	0.192	0.006	0.004	0.041	0.038	0.248	0.067	0.359	0.394	0.232	0.424	0.255	0.033	0.064	0.341	0.154	0.427	0.357	0.213	0.007	0.027	0.132	0.002	0.005	0.208	0.028	0.022	0
250	350	210	0.064	0.053	0.085	0.378	0.088	0.06	0.254	0.086	0.075	0.081	0.058	0.206	0.236	0.181	0.023	0.193	0.447	0.108	0.085	0.164	0.016	0.002	0.028	0.031	0.126	0.079	0.306	0.326	0.194	0.356	0.24	0.017	0.075	0.311	0.167	0.388	0.263	0.195	0.01	0.017	0.053	0.001	0.003	0.111	0.013	0.015	0
110	350	230	0.316	0.108	0.47	0.223	0.203	0.055	0.082	0.819	0.182	0.244	0.083	0.793	0.476	0.672	0.049	0.322	0.882	0.16	0.137	0.437	0.007	0.013	0.069	0.063	0.13	0.112	0.697	0.715	0.564	0.598	0.646	0.198	0.111	0.547	0.328	0.652	0.847	0.356	0.327	0.036	0.332	0.002	0.006	0.347	0.023	0	0
130	350	230	0.233	0.077	0.288	0.209	0.158	0.054	0.218	0.457	0.107	0.275	0.09	0.617	0.42	0.587	0.059	0.33	0.692	0.142	0.134	0.359	0.005	0.017	0.06	0.043	0.14	0.08	0.683	0.662	0.499	0.574	0.536	0.104	0.103	0.538	0.313	0.687	0.671	0.369	0.221	0.039	0.295	0.003	0.011	0.247	0.032	0.002	0
150	350	230	0.205	0.078	0.155	0.204	0.16	0.063	0.307	0.196	0.127	0.247	0.099	0.52	0.375	0.346	0.06	0.315	0.426	0.14	0.126	0.296	0.003	0.012	0.069	0.04	0.362	0.098	0.597	0.652	0.436	0.551	0.431	0.083	0.093	0.481	0.268	0.609	0.495	0.307	0.098	0.037	0.23	0.002	0.012	0.199	0.045	0.004	0
170	350	230	0.167	0.075	0.117	0.189	0.134	0.072	0.417	0.114	0.101	0.193	0.109	0.45	0.353	0.358	0.059	0.301	0.385	0.146	0.117	0.259	0.003	0.017	0.055	0.045	0.445	0.083	0.532	0.631	0.367	0.515	0.392	0.071	0.086	0.443	0.213	0.554	0.46	0.26	0.029	0.034	0.248	0.002	0.013	0.161	0.042	0.003	0
190	350	230	0.136	0.057	0.08	0.184	0.124	0.111	0.452	0.093	0.098	0.159	0.11	0.412	0.333	0.344	0.048	0.272	0.41	0.141	0.108	0.231	0.003	0.013	0.046	0.036	0.479	0.079	0.476	0.476	0.316	0.472	0.341	0.058	0.079	0.406	0.189	0.519	0.379	0.243	0.008	0.031	0.236	0.002	0.008	0.165	0.036	0.003	0
210	350	230	0.105	0.05	0.071	0.164	0.119	0.071	0.336	0.114	0.113	0.128	0.077	0.361	0.287	0.462	0.033	0.242	0.362	0.13	0.097	0.209	0.004	0.005	0.035	0.024	0.405	0.067	0.404	0.426	0.266	0.453	0.285	0.042	0.069	0.366	0.168	0.465	0.327	0.225	0.005	0.031	0.179	0.002	0.005	0.218	0.032	0	0
230	350	230	0.082	0.052	0.085	0.159	0.115	0.044	0.227	0.119	0.103	0.108	0.07	0.292	0.263	0.348	0.032	0.215	0.364	0.119	0.09	0.189	0.005	0.003	0.029	0.027	0.276	0.064	0.344	0.371	0.223	0.42	0.248	0.034	0.061	0.333	0.151	0.413	0.293	0.201	0.004	0.024	0.108	0.001	0.004	0.194	0.034	0.002	0
250	350	230	0.068	0.058	0.071	0.249	0.115	0.06	0.215	0.082	0.094	0.086	0.062	0.239	0.255	0.224	0.024	0.185	0.391	0.116	0.083	0.168	0.015	0.003	0.025	0.03	0.188	0.064	0.3	0.341	0.197	0.369	0.224	0.026	0.069	0.313	0.139	0.371	0.261	0.191	0.006	0.024	0.071	0.001	0.004	0.171	0.028	0.003	0
270	350	230	0.057	0.063	0.047	0.285	0.063	0.079	0.167	0.05	0.089	0.068	0.053	0.21	0.267	0.149	0.017	0.159	0.42	0.094	0.076	0.153	0.034	0.003	0.022	0.033	0.181	0.078	0.252	0.306	0.177	0.323	0.2	0.018	0.076	0.304	0.152	0.336	0.236	0.182	0.009	0.02	0.052	0.001	0.002	0.152	0.02	0.003	0
90	350	250	0.336	0.064	0.442	0.236	0.174	0.05	0.029	0.944	0.082	0.221	0.068	0.744	0.445	0.69	0.032	0.28	0.824	0.222	0.126	0.475	0.014	0.007	0.052	0.041	0.062	0.076	0.66	0.804	0.468	0.535	0.485	0.06	0.099	0.482	0.389	0.531	0.828	0.253	0.425	0.035	0.375	0.003	0.004	0.296	0.017	0.015	0
110	350	250	0.241	0.072	0.418	0.243	0.16	0.048	0.069	0.783	0.079	0.238	0.068	0.667	0.411	0.522	0.045	0.318	0.696	0.167	0.128	0.548	0.013	0.007	0.044	0.072	0.087	0.101	0.673	0.689	0.475	0.53	0.54	0.08	0.096	0.495	0.273	0.629	0.864	0.306	0.273	0.036	0.262	0.003	0.004	0.304	0.039	0.012	0.001
130	350	250	0.197	0.052	0.135	0.181	0.142	0.049	0.279	0.304	0.099	0.231	0.072	0.496	0.303	0.21	0.044	0.303	0.412	0.144	0.117	0.294	0.004	0.005	0.043	0.03	0.365	0.069	0.598	0.62	0.434	0.516	0.429	0.106	0.085	0.464	0.246	0.6	0.483	0.307	0.102	0.044	0.222	0.002	0.007	0.126	0.059	0.009	0.009
150	350	250	0.196	0.065	0.066	0.163	0.14	0.059	0.333	0.087	0.113	0.219	0.09	0.45	0.327	0.223	0.053	0.299	0.274	0.151	0.115	0.308	0.002	0.007	0.048	0.026	0.527	0.082	0.544	0.612	0.387	0.505	0.403	0.098	0.082	0.435	0.211	0.538	0.425	0.325	0.036	0.04	0.237	0.002	0.03	0.132	0.082	0.039	0
170	350	250	0.157	0.066	0.044	0.155	0.111	0.128	0.494	0.053	0.084	0.176	0.085	0.399	0.322	0.36	0.041	0.274	0.297	0.148	0.11	0.261	0.003	0.004	0.039	0.028	0.551	0.069	0.503	0.615	0.348	0.485	0.384	0.076	0.075	0.422	0.199	0.515	0.389	0.275	0.008	0.034	0.297	0.003	0.009	0.132	0.056	0.011	0
190	350	250	0.113	0.041	0.041	0.142	0.096	0.123	0.416	0.071	0.073	0.14	0.079	0.364	0.335	0.573	0.031	0.251	0.322	0.145	0.1	0.218	0.003	0.002	0.028	0.019	0.526	0.065	0.442	0.438	0.3	0.446	0.331	0.048	0.069	0.395	0.178	0.492	0.334	0.225	0.002	0.031	0.248	0.002	0.007	0.182	0.044	0.001	0
210	350	250	0.095	0.042	0.047	0.145	0.109	0.046	0.325	0.094	0.083	0.122	0.088	0.314	0.261	0.32	0.037	0.224	0.291	0.15	0.09	0.197	0.003	0.005	0.027	0.023	0.377	0.058	0.374	0.384	0.25	0.412	0.29	0.046	0.061	0.347	0.156	0.428	0.292	0.198	0.002	0.024	0.114	0.002	0.004	0.162	0.041	0	0
230	350	250	0.083	0.054	0.069	0.137	0.103	0.046	0.304	0.058	0.074	0.105	0.08	0.244	0.212	0.252	0.036	0.198	0.276	0.104	0.083	0.173	0.003	0.005	0.024	0.028	0.234	0.054	0.32	0.344	0.211	0.367	0.253	0.041	0.057	0.317	0.138	0.382	0.265	0.179	0.002	0.022	0.048	0.002	0.004	0.131	0.045	0	0
250	350	250	0.07	0.07	0.053	0.126	0.113	0.065	0.212	0.044	0.09	0.086	0.065	0.207	0.18	0.259	0.028	0.181	0.331	0.099	0.076	0.171	0.006	0.004	0.022	0.032	0.17	0.049	0.277	0.322	0.186	0.34	0.219	0.029	0.056	0.304	0.125	0.344	0.237	0.168	0.002	0.021	0.04	0.001	0.005	0.187	0.037	0	0
270	350	250	0.058	0.089	0.039	0.126	0.087	0.066	0.123	0.04	0.088	0.071	0.058	0.177	0.157	0.23	0.021	0.163	0.363	0.111	0.07	0.165	0.01	0.004	0.022	0.031	0.15	0.041	0.232	0.287	0.159	0.318	0.185	0.022	0.052	0.284	0.135	0.301	0.214	0.15	0.003	0.019	0.036	0.001	0.002	0.241	0.034	0	0
290	350	250	0.047	0.082	0.031	0.108	0.06	0.064	0.06	0.036	0.077	0.06	0.054	0.137	0.139	0.168	0.018	0.145	0.391	0.107	0.063	0.159	0.012	0.004	0.016	0.036	0.108	0.039	0.196	0.245	0.137	0.28	0.158	0.015	0.046	0.271	0.093	0.255	0.196	0.135	0.004	0.012	0.023	0.001	0.002	0.248	0.033	0.002	0
310	350	250	0.035	0.068	0.027	0.07	0.047	0.039	0.025	0.026	0.048	0.05	0.046	0.088	0.123	0.129	0.016	0.129	0.315	0.121	0.052	0.125	0.008	0.003	0.013	0.016	0.067	0.032	0.154	0.194	0.112	0.226	0.126	0.008	0.033	0.24	0.078	0.211	0.162	0.113	0.002	0.001	0.013	0.001	0.001	0.188	0.018	0	0
90	350	270	0.236	0.045	0.503	0.286	0.196	0.052	0.01	0.979	0.052	0.202	0.07	0.741	0.477	0.499	0.042	0.308	0.815	0.116	0.135	0.574	0.03	0.006	0.047	0.052	0.03	0.054	0.733	0.803	0.486	0.582	0.534	0.12	0.111	0.54	0.394	0.591	0.841	0.283	0.446	0.032	0.359	0.003	0.034	0.378	0.023	0.006	0
110	350	270	0.227	0.062	0.341	0.197	0.145	0.051	0.086	0.779	0.06	0.193	0.056	0.669	0.338	0.246	0.036	0.297	0.589	0.155	0.127	0.421	0.011	0.007	0.054	0.046	0.202	0.071	0.695	0.631	0.45	0.566	0.569	0.244	0.103	0.525	0.263	0.589	0.63	0.314	0.217	0.029	0.241	0.001	0.007	0.213	0.033	0.006	0
130	350	270	0.189	0.057	0.063	0.152	0.144	0.051	0.314	0.229	0.071	0.208	0.06	0.512	0.331	0.152	0.033	0.272	0.326	0.141	0.111	0.257	0.002	0.002	0.039	0.016	0.576	0.061	0.595	0.597	0.39	0.504	0.453	0.127	0.081	0.458	0.221	0.567	0.45	0.286	0.067	0.035	0.244	0.002	0.005	0.031	0.065	0.005	0
150	350	270	0.165	0.045	0.041	0.146	0.117	0.056	0.309	0.069	0.048	0.191	0.068	0.406	0.315	0.203	0.028	0.27	0.221	0.125	0.108	0.265	0.004	0.001	0.033	0.013	0.606	0.062	0.541	0.586	0.366	0.483	0.414	0.121	0.076	0.442	0.203	0.526	0.426	0.254	0.025	0.033	0.289	0.002	0.005	0.038	0.071	0.033	0
170	350	270	0.138	0.048	0.037	0.155	0.114	0.147	0.58	0.049	0.043	0.16	0.067	0.363	0.321	0.497	0.025	0.253	0.299	0.128	0.105	0.24	0.002	0.002	0.027	0.018	0.599	0.06	0.487	0.578	0.34	0.452	0.391	0.082	0.068	0.431	0.191	0.508	0.378	0.239	0.002	0.025	0.335	0.001	0.011	0.133	0.047	0.001	0
190	350	270	0.101	0.029	0.034	0.125	0.076	0.065	0.347	0.091	0.042	0.124	0.067	0.345	0.294	0.558	0.024	0.235	0.27	0.131	0.096	0.208	0.002	0.001	0.021	0.011	0.521	0.053	0.425	0.418	0.301	0.408	0.331	0.07	0.062	0.4	0.168	0.473	0.329	0.207	0.001	0.022	0.228	0.001	0.003	0.176	0.04	0.001	0
210	350	270	0.085	0.029	0.036	0.122	0.103	0.06	0.375	0.073	0.065	0.103	0.074	0.252	0.227	0.189	0.029	0.208	0.257	0.112	0.088	0.186	0.002	0.003	0.019	0.017	0.294	0.057	0.372	0.38	0.259	0.39	0.297	0.058	0.057	0.36	0.154	0.411	0.29	0.189	0.001	0.024	0.057	0.001	0.008	0.065	0.052	0.003	0
230	350	270	0.078	0.05	0.05	0.12	0.087	0.049	0.32	0.031	0.075	0.092	0.075	0.181	0.18	0.174	0.032	0.184	0.215	0.098	0.079	0.171	0.003	0.003	0.02	0.026	0.148	0.052	0.319	0.338	0.21	0.348	0.262	0.052	0.053	0.316	0.133	0.357	0.252	0.166	0.002	0.022	0.02	0.001	0.004	0.1	0.052	0.024	0
250	350	270	0.065	0.065	0.04	0.111	0.097	0.055	0.181	0.031	0.067	0.081	0.064	0.157	0.154	0.173	0.028	0.175	0.274	0.091	0.072	0.167	0.005	0.002	0.019	0.027	0.09	0.047	0.279	0.307	0.177	0.324	0.226	0.04	0.049	0.295	0.121	0.323	0.224	0.154	0.002	0.021	0.021	0.003	0.003	0.183	0.051	0.02	0
270	350	270	0.054	0.076	0.026	0.085	0.061	0.041	0.12	0.022	0.058	0.064	0.052	0.134	0.131	0.142	0.021	0.133	0.329	0.1	0.064	0.144	0.003	0.002	0.016	0.043	0.077	0.037	0.224	0.265	0.152	0.291	0.183	0.03	0.039	0.275	0.131	0.275	0.191	0.131	0.002	0.019	0.018	0.001	0.002	0.23	0.042	0.001	0
290	350	270	0.045	0.069	0.02	0.075	0.06	0.032	0.042	0.022	0.059	0.055	0.051	0.112	0.125	0.158	0.018	0.114	0.399	0.084	0.061	0.137	0.002	0.002	0.013	0.062	0.101	0.034	0.197	0.238	0.134	0.265	0.154	0.019	0.034	0.269	0.088	0.244	0.176	0.122	0.001	0.011	0.011	0.001	0.001	0.251	0.034	0.003	0
310	350	270	0.033	0.055	0.018	0.067	0.052	0.031	0.028	0.026	0.06	0.053	0.048	0.098	0.111	0.169	0.016	0.105	0.361	0.105	0.053	0.117	0.002	0.002	0.012	0.024	0.109	0.033	0.167	0.206	0.117	0.233	0.132	0.008	0.03	0.253	0.078	0.21	0.16	0.112	0.002	0.002	0.012	0.001	0.001	0.218	0.016	0.002	0
90	350	290	0.245	0.041	0.462	0.196	0.153	0.046	0.006	0.852	0.038	0.143	0.058	0.628	0.503	0.202	0.03	0.288	0.709	0.156	0.13	0.328	0.007	0.007	0.041	0.037	0.02	0.092	0.688	0.757	0.455	0.565	0.561	0.611	0.108	0.526	0.304	0.551	0.603	0.296	0.517	0.053	0.381	0.003	0.027	0.177	0.032	0.009	0.001
110	350	290	0.234	0.05	0.397	0.199	0.137	0.056	0.095	0.843	0.098	0.114	0.04	0.684	0.359	0.086	0.029	0.311	0.669	0.343	0.127	0.3	0.003	0.006	0.05	0.069	0.146	0.151	0.734	0.684	0.46	0.609	0.743	0.79	0.102	0.58	0.341	0.655	0.593	0.33	0.343	0.025	0.306	0.001	0.024	0.046	0.021	0.004	0.002
130	350	290	0.177	0.043	0.07	0.15	0.127	0.059	0.38	0.311	0.107	0.161	0.05	0.537	0.364	0.126	0.028	0.268	0.325	0.156	0.105	0.251	0.002	0.002	0.046	0.021	0.587	0.076	0.6	0.593	0.384	0.525	0.494	0.281	0.082	0.469	0.216	0.582	0.46	0.245	0.124	0.027	0.272	0.002	0.004	0.01	0.051	0.041	0
150	350	290	0.145	0.04	0.038	0.137	0.107	0.065	0.411	0.075	0.036	0.144	0.055	0.401	0.321	0.203	0.021	0.262	0.221	0.111	0.099	0.237	0.003	0.002	0.032	0.012	0.648	0.059	0.561	0.557	0.359	0.477	0.419	0.099	0.075	0.449	0.206	0.507	0.402	0.247	0.032	0.027	0.289	0.001	0.006	0.026	0.046	0.03	0.001
170	350	290	0.119	0.041	0.031	0.118	0.128	0.079	0.489	0.082	0.064	0.107	0.051	0.298	0.259	0.364	0.018	0.214	0.25	0.094	0.085	0.201	0.002	0.001	0.025	0.016	0.524	0.05	0.452	0.496	0.299	0.4	0.342	0.06	0.059	0.388	0.161	0.438	0.332	0.201	0.001	0.02	0.298	0.001	0.005	0.109	0.031	0	0
190	350	290	0.091	0.02	0.03	0.122	0.097	0.039	0.35	0.109	0.061	0.099	0.054	0.3	0.245	0.171	0.018	0.215	0.299	0.102	0.087	0.187	0.002	0	0.018	0.01	0.413	0.05	0.423	0.394	0.287	0.391	0.324	0.057	0.063	0.36	0.155	0.445	0.304	0.201	0.001	0.022	0.157	0.001	0.003	0.075	0.042	0.012	0
210	350	290	0.077	0.034	0.031	0.114	0.084	0.06	0.393	0.059	0.057	0.093	0.055	0.205	0.17	0.114	0.02	0.196	0.252	0.093	0.082	0.17	0.001	0.001	0.018	0.013	0.219	0.059	0.375	0.367	0.254	0.374	0.293	0.052	0.053	0.351	0.145	0.395	0.268	0.183	0.001	0.023	0.029	0.001	0.004	0.026	0.049	0.026	0
230	350	290	0.066	0.042	0.037	0.111	0.058	0.045	0.304	0.025	0.087	0.072	0.051	0.151	0.138	0.126	0.021	0.162	0.198	0.079	0.071	0.146	0.002	0.001	0.017	0.031	0.113	0.041	0.306	0.307	0.201	0.326	0.252	0.039	0.047	0.31	0.121	0.333	0.222	0.15	0.001	0.021	0.006	0.002	0.003	0.063	0.043	0.002	0
250	350	290	0.053	0.056	0.025	0.086	0.079	0.029	0.189	0.024	0.068	0.062	0.046	0.117	0.119	0.126	0.018	0.135	0.217	0.089	0.063	0.126	0.002	0.001	0.014	0.023	0.032	0.04	0.256	0.276	0.161	0.287	0.207	0.023	0.046	0.283	0.115	0.29	0.19	0.136	0.002	0.018	0.006	0.003	0.002	0.156	0.041	0.005	0
270	350	290	0.049	0.051	0.015	0.06	0.046	0.022	0.13	0.016	0.052	0.052	0.046	0.107	0.109	0.104	0.016	0.1	0.288	0.096	0.054	0.106	0.002	0.001	0.012	0.026	0.03	0.029	0.188	0.209	0.128	0.237	0.146	0.011	0.031	0.238	0.111	0.227	0.146	0.11	0.007	0.016	0.01	0.001	0.001	0.215	0.028	0	0
290	350	290	0.038	0.047	0.015	0.064	0.041	0.024	0.022	0.017	0.044	0.05	0.052	0.104	0.119	0.121	0.016	0.098	0.379	0.096	0.055	0.112	0.002	0.001	0.011	0.032	0.05	0.033	0.174	0.206	0.111	0.228	0.132	0.005	0.028	0.243	0.079	0.226	0.15	0.11	0.002	0.009	0.006	0.001	0.001	0.262	0.023	0	0
310	350	290	0.029	0.035	0.014	0.062	0.041	0.025	0.014	0.018	0.03	0.049	0.047	0.076	0.103	0.129	0.015	0.095	0.358	0.101	0.051	0.105	0.001	0.001	0.011	0.017	0.06	0.032	0.164	0.198	0.11	0.207	0.132	0.005	0.028	0.245	0.074	0.21	0.152	0.106	0.001	0.001	0.007	0.001	0.001	0.237	0.017	0	0
330	350	290	0.028	0.032	0.014	0.059	0.036	0.021	0.007	0.012	0.027	0.042	0.047	0.047	0.071	0.117	0.013	0.093	0.294	0.141	0.045	0.092	0.001	0.001	0.01	0.002	0.044	0.042	0.139	0.169	0.1	0.192	0.114	0.003	0.026	0.23	0.067	0.182	0.139	0.094	0.001	0	0.004	0	0.008	0.194	0.013	0.009	0
170	370	170	0.16	0.094	0.455	0.207	0.138	0.055	0.092	0.345	0.15	0.261	0.134	0.583	0.459	0.674	0.078	0.303	0.662	0.228	0.125	0.32	0.011	0.015	0.098	0.071	0.167	0.115	0.581	0.659	0.532	0.593	0.496	0.206	0.107	0.51	0.246	0.612	0.641	0.342	0.059	0.024	0.206	0.002	0.007	0.325	0.017	0.007	0
190	370	170	0.139	0.051	0.385	0.193	0.128	0.056	0.068	0.301	0.083	0.206	0.121	0.463	0.434	0.683	0.061	0.297	0.657	0.173	0.127	0.296	0.012	0.018	0.076	0.063	0.048	0.088	0.543	0.582	0.378	0.563	0.439	0.11	0.101	0.494	0.232	0.619	0.678	0.312	0.05	0.026	0.17	0.002	0.005	0.249	0.018	0.002	0
210	370	170	0.121	0.034	0.329	0.142	0.079	0.044	0.06	0.226	0.092	0.155	0.1	0.337	0.369	0.613	0.049	0.288	0.503	0.183	0.109	0.259	0.009	0.012	0.057	0.052	0.032	0.083	0.457	0.458	0.307	0.504	0.405	0.069	0.078	0.443	0.194	0.533	0.488	0.286	0.043	0.022	0.171	0.002	0.007	0.115	0.015	0.004	0
110	370	190	0.33	0.124	0.612	0.198	0.228	0.071	0.064	0.65	0.24	0.272	0.098	0.857	0.47	0.505	0.071	0.322	0.837	0.203	0.131	0.422	0.014	0.016	0.086	0.035	0.235	0.256	0.7	0.635	0.727	0.66	0.604	0.631	0.13	0.545	0.274	0.621	0.733	0.378	0.185	0.033	0.303	0.002	0.012	0.402	0.022	0.001	0
130	370	190	0.304	0.118	0.518	0.246	0.191	0.072	0.112	0.591	0.237	0.301	0.122	0.755	0.528	0.777	0.083	0.352	0.838	0.259	0.139	0.357	0.013	0.014	0.097	0.042	0.257	0.154	0.747	0.678	0.858	0.682	0.616	0.482	0.139	0.593	0.287	0.701	0.793	0.383	0.157	0.037	0.254	0.002	0.014	0.385	0.031	0.001	0
150	370	190	0.27	0.074	0.401	0.237	0.166	0.067	0.32	0.43	0.125	0.282	0.129	0.656	0.528	0.669	0.077	0.356	0.733	0.251	0.144	0.357	0.009	0.013	0.108	0.062	0.114	0.123	0.72	0.712	0.625	0.683	0.65	0.296	0.129	0.596	0.288	0.739	0.775	0.383	0.103	0.042	0.236	0.002	0.016	0.266	0.04	0.002	0
170	370	190	0.222	0.049	0.292	0.214	0.162	0.064	0.459	0.266	0.092	0.249	0.13	0.521	0.483	0.624	0.074	0.34	0.555	0.147	0.142	0.354	0.008	0.014	0.11	0.063	0.086	0.098	0.643	0.745	0.464	0.659	0.544	0.183	0.107	0.57	0.272	0.705	0.749	0.354	0.065	0.037	0.202	0.003	0.02	0.239	0.044	0	0
190	370	190	0.172	0.042	0.249	0.203	0.153	0.059	0.436	0.179	0.106	0.212	0.131	0.482	0.456	0.61	0.066	0.32	0.507	0.14	0.134	0.31	0.007	0.015	0.087	0.058	0.138	0.087	0.571	0.6	0.396	0.609	0.45	0.099	0.091	0.511	0.236	0.658	0.651	0.318	0.041	0.04	0.218	0.002	0.008	0.235	0.036	0	0
210	370	190	0.134	0.046	0.287	0.177	0.122	0.059	0.307	0.204	0.127	0.172	0.116	0.438	0.455	0.684	0.062	0.291	0.518	0.153	0.119	0.281	0.006	0.011	0.071	0.048	0.161	0.089	0.494	0.498	0.328	0.54	0.369	0.062	0.081	0.456	0.207	0.572	0.6	0.293	0.024	0.033	0.225	0.002	0.01	0.227	0.029	0	0
230	370	190	0.105	0.05	0.2	0.157	0.108	0.06	0.237	0.172	0.127	0.129	0.092	0.334	0.391	0.492	0.049	0.278	0.421	0.136	0.102	0.231	0.007	0.005	0.053	0.046	0.167	0.096	0.416	0.433	0.273	0.493	0.305	0.088	0.073	0.393	0.177	0.484	0.441	0.253	0.011	0.043	0.158	0.002	0.028	0.184	0.028	0.013	0.001
250	370	190	0.067	0.045	0.09	0.169	0.083	0.129	0.28	0.084	0.069	0.091	0.065	0.265	0.297	0.491	0.027	0.213	0.379	0.108	0.084	0.272	0.01	0.011	0.027	0.023	0.173	0.051	0.319	0.376	0.213	0.448	0.238	0.025	0.061	0.326	0.143	0.413	0.324	0.205	0.005	0.011	0.14	0.001	0.002	0.059	0.01	0.006	0.001
90	370	210	0.329	0.11	0.612	0.171	0.179	0.065	0.066	0.675	0.188	0.215	0.082	0.838	0.441	0.405	0.046	0.278	0.848	0.261	0.114	0.456	0.01	0.012	0.077	0.03	0.187	0.174	0.644	0.609	0.562	0.617	0.488	0.552	0.115	0.473	0.269	0.53	0.68	0.323	0.214	0.026	0.32	0.002	0.008	0.38	0.014	0	0
110	370	210	0.37	0.129	0.605	0.217	0.242	0.075	0.041	0.801	0.285	0.266	0.099	0.861	0.505	0.62	0.066	0.362	0.925	0.247	0.144	0.42	0.011	0.014	0.091	0.029	0.26	0.258	0.803	0.728	0.829	0.743	0.648	0.569	0.137	0.595	0.314	0.705	0.846	0.357	0.203	0.039	0.311	0.002	0.014	0.426	0.028	0	0
130	370	210	0.318	0.083	0.535	0.222	0.228	0.081	0.143	0.66	0.132	0.257	0.101	0.724	0.5	0.689	0.071	0.38	0.88	0.182	0.14	0.366	0.009	0.016	0.1	0.053	0.11	0.149	0.762	0.715	0.591	0.677	0.635	0.419	0.134	0.581	0.288	0.732	0.815	0.357	0.199	0.031	0.289	0.004	0.012	0.277	0.033	0.022	0.001
150	370	210	0.264	0.062	0.307	0.241	0.181	0.062	0.322	0.341	0.106	0.278	0.131	0.589	0.451	0.511	0.079	0.347	0.612	0.173	0.139	0.314	0.007	0.016	0.098	0.047	0.079	0.112	0.7	0.708	0.481	0.661	0.537	0.211	0.111	0.563	0.286	0.711	0.708	0.35	0.127	0.047	0.224	0.003	0.022	0.218	0.041	0.027	0
170	370	210	0.194	0.055	0.158	0.278	0.166	0.06	0.407	0.175	0.086	0.249	0.137	0.493	0.458	0.438	0.077	0.327	0.519	0.124	0.137	0.293	0.005	0.014	0.076	0.052	0.123	0.087	0.61	0.695	0.427	0.609	0.458	0.116	0.094	0.539	0.28	0.671	0.626	0.316	0.092	0.037	0.192	0.002	0.01	0.178	0.04	0.003	0
190	370	210	0.151	0.043	0.134	0.229	0.138	0.067	0.614	0.132	0.071	0.189	0.147	0.457	0.4	0.454	0.068	0.295	0.395	0.129	0.124	0.283	0.003	0.017	0.067	0.048	0.26	0.08	0.526	0.55	0.357	0.56	0.392	0.075	0.086	0.48	0.219	0.613	0.501	0.284	0.029	0.029	0.182	0.002	0.005	0.152	0.039	0.001	0
210	370	210	0.121	0.041	0.133	0.198	0.11	0.069	0.47	0.117	0.079	0.155	0.111	0.394	0.362	0.446	0.063	0.265	0.384	0.131	0.112	0.242	0.004	0.011	0.055	0.04	0.294	0.071	0.459	0.454	0.301	0.551	0.341	0.061	0.076	0.428	0.189	0.542	0.458	0.256	0.011	0.026	0.16	0.002	0.007	0.166	0.038	0	0
230	370	210	0.098	0.049	0.126	0.188	0.102	0.087	0.33	0.117	0.104	0.117	0.084	0.328	0.317	0.354	0.046	0.24	0.408	0.139	0.098	0.206	0.006	0.004	0.044	0.04	0.269	0.083	0.385	0.399	0.249	0.452	0.29	0.04	0.071	0.377	0.167	0.46	0.371	0.222	0.009	0.032	0.145	0.001	0.007	0.165	0.032	0.059	0
250	370	210	0.08	0.051	0.061	0.259	0.097	0.125	0.442	0.09	0.077	0.089	0.07	0.259	0.318	0.373	0.023	0.201	0.44	0.119	0.09	0.279	0.013	0.007	0.029	0.028	0.243	0.081	0.341	0.376	0.226	0.401	0.251	0.024	0.068	0.36	0.18	0.439	0.334	0.199	0.004	0.023	0.138	0.001	0.003	0.066	0.018	0.036	0
270	370	210	0.054	0.028	0.135	0.192	0.047	0.066	0.205	0.081	0.068	0.073	0.06	0.236	0.328	0.643	0.019	0.163	0.422	0.086	0.081	0.363	0.011	0.01	0.023	0.04	0.122	0.06	0.28	0.325	0.19	0.36	0.218	0.012	0.052	0.338	0.168	0.364	0.398	0.189	0.007	0.017	0.153	0.001	0.003	0.047	0.012	0.002	0
90	370	230	0.4	0.144	0.634	0.215	0.22	0.062	0.033	0.987	0.268	0.21	0.081	0.906	0.508	0.522	0.043	0.34	0.96	0.26	0.142	0.411	0.013	0.017	0.074	0.029	0.217	0.104	0.756	0.778	0.655	0.662	0.592	0.435	0.134	0.561	0.336	0.653	0.789	0.33	0.325	0.036	0.41	0.002	0.013	0.416	0.02	0	0
110	370	230	0.343	0.092	0.629	0.214	0.214	0.069	0.065	0.877	0.167	0.233	0.079	0.795	0.518	0.68	0.056	0.352	0.916	0.202	0.139	0.403	0.012	0.013	0.079	0.038	0.107	0.168	0.756	0.745	0.572	0.665	0.594	0.377	0.132	0.57	0.291	0.685	0.874	0.336	0.239	0.035	0.341	0.002	0.011	0.324	0.025	0.002	0
130	370	230	0.281	0.06	0.384	0.206	0.224	0.065	0.168	0.551	0.109	0.273	0.09	0.601	0.464	0.625	0.065	0.339	0.693	0.201	0.138	0.356	0.011	0.019	0.076	0.049	0.089	0.107	0.718	0.696	0.504	0.621	0.567	0.183	0.109	0.562	0.269	0.697	0.837	0.369	0.17	0.03	0.228	0.002	0.014	0.26	0.041	0.029	0
150	370	230	0.213	0.043	0.169	0.213	0.135	0.057	0.385	0.182	0.093	0.259	0.105	0.482	0.408	0.299	0.065	0.314	0.409	0.131	0.134	0.356	0.005	0.01	0.063	0.04	0.225	0.075	0.633	0.651	0.447	0.577	0.453	0.131	0.094	0.53	0.247	0.641	0.559	0.318	0.069	0.048	0.176	0.002	0.014	0.177	0.055	0.01	0
170	370	230	0.178	0.06	0.084	0.219	0.145	0.063	0.51	0.077	0.086	0.215	0.131	0.433	0.349	0.273	0.079	0.297	0.301	0.138	0.12	0.268	0.003	0.013	0.054	0.047	0.349	0.082	0.542	0.644	0.374	0.531	0.389	0.106	0.081	0.468	0.21	0.581	0.444	0.265	0.014	0.032	0.164	0.003	0.009	0.136	0.058	0.02	0
190	370	230	0.148	0.048	0.074	0.212	0.137	0.067	0.555	0.061	0.066	0.177	0.132	0.4	0.318	0.313	0.072	0.267	0.297	0.135	0.109	0.244	0.003	0.012	0.045	0.039	0.349	0.076	0.479	0.487	0.321	0.495	0.364	0.079	0.078	0.427	0.191	0.551	0.397	0.245	0.008	0.028	0.164	0.003	0.008	0.149	0.052	0.009	0
210	370	230	0.121	0.045	0.069	0.17	0.121	0.097	0.538	0.076	0.066	0.134	0.093	0.362	0.294	0.398	0.041	0.242	0.342	0.123	0.098	0.215	0.003	0.005	0.036	0.024	0.389	0.069	0.424	0.418	0.274	0.444	0.319	0.047	0.069	0.391	0.167	0.481	0.358	0.225	0.006	0.024	0.206	0.002	0.01	0.143	0.038	0.003	0
230	370	230	0.089	0.043	0.06	0.16	0.097	0.111	0.384	0.096	0.087	0.106	0.075	0.313	0.278	0.37	0.029	0.209	0.369	0.105	0.087	0.191	0.004	0.003	0.029	0.029	0.35	0.07	0.356	0.361	0.234	0.406	0.26	0.034	0.063	0.346	0.151	0.422	0.302	0.198	0.006	0.023	0.152	0.001	0.004	0.159	0.029	0.044	0
250	370	230	0.068	0.05	0.047	0.253	0.107	0.083	0.3	0.077	0.092	0.083	0.065	0.259	0.305	0.19	0.022	0.178	0.41	0.09	0.081	0.17	0.013	0.004	0.022	0.068	0.203	0.088	0.3	0.329	0.198	0.368	0.228	0.024	0.065	0.324	0.145	0.383	0.269	0.192	0.006	0.021	0.078	0.001	0.003	0.118	0.02	0.01	0
270	370	230	0.056	0.054	0.051	0.257	0.051	0.1	0.21	0.049	0.074	0.071	0.059	0.211	0.274	0.227	0.017	0.15	0.417	0.077	0.075	0.205	0.023	0.006	0.02	0.061	0.148	0.074	0.255	0.303	0.17	0.327	0.2	0.015	0.063	0.319	0.151	0.341	0.291	0.175	0.006	0.019	0.068	0.001	0.003	0.117	0.017	0.004	0
290	370	230	0.045	0.052	0.099	0.11	0.045	0.093	0.11	0.059	0.087	0.064	0.055	0.168	0.21	0.28	0.017	0.133	0.429	0.074	0.066	0.249	0.015	0.007	0.016	0.079	0.085	0.041	0.209	0.253	0.146	0.3	0.165	0.011	0.046	0.296	0.108	0.277	0.305	0.146	0.006	0.012	0.071	0.001	0.002	0.164	0.014	0	0
90	370	250	0.339	0.079	0.569	0.204	0.212	0.053	0.058	0.984	0.145	0.211	0.063	0.786	0.503	0.628	0.039	0.339	0.893	0.207	0.131	0.454	0.023	0.014	0.05	0.04	0.077	0.081	0.734	0.77	0.514	0.585	0.547	0.131	0.116	0.506	0.357	0.599	0.836	0.264	0.355	0.036	0.456	0.002	0.005	0.344	0.019	0.092	0
110	370	250	0.286	0.067	0.535	0.195	0.179	0.065	0.075	0.78	0.113	0.237	0.07	0.668	0.45	0.657	0.053	0.339	0.775	0.187	0.137	0.561	0.02	0.009	0.046	0.06	0.056	0.109	0.742	0.722	0.509	0.597	0.562	0.136	0.114	0.533	0.272	0.665	0.904	0.324	0.2	0.035	0.277	0.002	0.005	0.303	0.03	0.028	0.001
130	370	250	0.217	0.037	0.239	0.198	0.164	0.058	0.258	0.477	0.056	0.219	0.069	0.524	0.363	0.357	0.042	0.31	0.422	0.19	0.13	0.349	0.013	0.006	0.042	0.032	0.242	0.09	0.65	0.648	0.454	0.561	0.508	0.136	0.099	0.528	0.244	0.659	0.659	0.298	0.175	0.032	0.188	0.002	0.005	0.152	0.062	0.012	0.001
150	370	250	0.189	0.038	0.068	0.19	0.134	0.054	0.504	0.089	0.053	0.202	0.084	0.436	0.34	0.18	0.045	0.282	0.273	0.142	0.117	0.283	0.004	0.002	0.04	0.018	0.467	0.073	0.558	0.614	0.384	0.521	0.411	0.119	0.081	0.48	0.211	0.563	0.464	0.266	0.032	0.036	0.209	0.002	0.016	0.067	0.073	0.023	0
170	370	250	0.157	0.041	0.047	0.189	0.123	0.061	0.592	0.05	0.067	0.173	0.092	0.394	0.316	0.268	0.046	0.254	0.233	0.127	0.106	0.26	0.002	0.003	0.033	0.028	0.478	0.078	0.484	0.592	0.325	0.481	0.364	0.092	0.068	0.426	0.192	0.509	0.432	0.276	0.008	0.029	0.221	0.002	0.008	0.088	0.062	0.01	0
190	370	250	0.124	0.04	0.042	0.16	0.109	0.095	0.627	0.044	0.064	0.141	0.092	0.354	0.286	0.455	0.047	0.238	0.235	0.124	0.099	0.228	0.002	0.003	0.029	0.024	0.465	0.07	0.429	0.468	0.285	0.445	0.33	0.067	0.063	0.395	0.173	0.482	0.351	0.224	0.003	0.029	0.218	0.002	0.01	0.133	0.052	0.031	0
210	370	250	0.098	0.038	0.047	0.151	0.107	0.064	0.445	0.057	0.067	0.122	0.098	0.299	0.255	0.319	0.047	0.211	0.254	0.11	0.088	0.19	0.002	0.004	0.024	0.024	0.374	0.06	0.367	0.368	0.237	0.404	0.29	0.051	0.058	0.351	0.151	0.428	0.288	0.193	0.003	0.024	0.12	0.002	0.004	0.135	0.043	0.003	0
230	370	250	0.082	0.05	0.051	0.14	0.101	0.058	0.335	0.051	0.072	0.102	0.083	0.256	0.226	0.268	0.037	0.19	0.282	0.096	0.08	0.171	0.003	0.005	0.024	0.031	0.243	0.058	0.317	0.332	0.203	0.36	0.249	0.037	0.055	0.321	0.135	0.375	0.26	0.173	0.002	0.021	0.063	0.001	0.003	0.121	0.037	0.014	0
250	370	250	0.068	0.064	0.043	0.14	0.105	0.07	0.239	0.042	0.072	0.081	0.064	0.204	0.19	0.226	0.028	0.17	0.311	0.093	0.073	0.171	0.006	0.005	0.022	0.035	0.185	0.049	0.266	0.304	0.174	0.327	0.211	0.029	0.057	0.297	0.121	0.326	0.236	0.163	0.002	0.019	0.037	0.001	0.002	0.156	0.031	0.003	0
270	370	250	0.056	0.087	0.033	0.135	0.065	0.086	0.157	0.033	0.072	0.07	0.059	0.153	0.162	0.173	0.022	0.154	0.336	0.099	0.066	0.166	0.014	0.005	0.02	0.036	0.117	0.043	0.224	0.265	0.15	0.297	0.181	0.021	0.056	0.283	0.126	0.284	0.21	0.146	0.003	0.016	0.019	0.001	0.002	0.199	0.029	0.001	0
290	370	250	0.046	0.091	0.023	0.088	0.049	0.059	0.117	0.024	0.056	0.057	0.056	0.101	0.131	0.131	0.017	0.132	0.381	0.101	0.06	0.153	0.012	0.003	0.014	0.068	0.072	0.035	0.184	0.235	0.13	0.26	0.15	0.013	0.041	0.27	0.095	0.246	0.182	0.124	0.003	0.011	0.018	0.001	0.001	0.227	0.026	0	0
310	370	250	0.035	0.084	0.019	0.062	0.039	0.04	0.041	0.017	0.031	0.051	0.05	0.066	0.111	0.117	0.016	0.122	0.297	0.109	0.049	0.14	0.007	0.002	0.012	0.031	0.056	0.031	0.154	0.192	0.111	0.221	0.124	0.006	0.031	0.248	0.076	0.208	0.154	0.106	0.004	0.004	0.007	0.001	0.001	0.174	0.018	0	0
70	370	270	0.289	0.064	0.478	0.216	0.155	0.037	0.011	0.722	0.044	0.168	0.064	0.609	0.541	0.704	0.028	0.276	0.656	0.176	0.113	0.351	0.018	0.003	0.049	0.021	0.016	0.057	0.676	0.732	0.425	0.521	0.495	0.033	0.091	0.495	0.335	0.524	0.755	0.252	0.34	0.055	0.393	0.002	0.049	0.247	0.011	0.005	0.01
90	370	270	0.29	0.055	0.55	0.189	0.151	0.056	0.013	0.976	0.057	0.214	0.067	0.758	0.47	0.804	0.046	0.33	0.899	0.137	0.135	0.577	0.032	0.013	0.056	0.021	0.014	0.053	0.82	0.82	0.507	0.588	0.596	0.078	0.111	0.579	0.328	0.626	1	0.283	0.285	0.023	0.38	0.014	0.025	0.362	0.021	0.014	0
110	370	270	0.267	0.045	0.514	0.187	0.14	0.073	0.087	0.821	0.048	0.207	0.057	0.676	0.44	0.499	0.045	0.309	0.728	0.193	0.128	0.494	0.025	0.007	0.04	0.051	0.058	0.121	0.729	0.69	0.468	0.573	0.577	0.204	0.109	0.544	0.251	0.626	0.796	0.288	0.237	0.028	0.257	0.001	0.004	0.313	0.027	0.004	0
130	370	270	0.229	0.041	0.131	0.193	0.13	0.078	0.482	0.387	0.04	0.202	0.063	0.553	0.364	0.139	0.036	0.303	0.343	0.381	0.12	0.29	0.007	0.003	0.038	0.028	0.455	0.083	0.62	0.64	0.419	0.548	0.628	0.135	0.088	0.541	0.228	0.621	0.508	0.281	0.159	0.033	0.228	0.001	0.007	0.047	0.078	0.028	0.001
150	370	270	0.19	0.034	0.052	0.167	0.147	0.054	0.717	0.063	0.053	0.166	0.069	0.426	0.32	0.162	0.034	0.257	0.221	0.129	0.106	0.25	0.003	0.001	0.032	0.015	0.501	0.064	0.516	0.588	0.37	0.501	0.415	0.154	0.073	0.468	0.204	0.524	0.446	0.244	0.017	0.032	0.239	0.001	0.004	0.022	0.102	0.024	0
170	370	270	0.139	0.033	0.035	0.173	0.102	0.098	0.77	0.045	0.029	0.141	0.068	0.365	0.3	0.398	0.029	0.23	0.197	0.112	0.101	0.229	0.003	0.001	0.023	0.018	0.527	0.057	0.465	0.595	0.326	0.441	0.367	0.079	0.063	0.44	0.187	0.477	0.388	0.219	0.005	0.024	0.267	0.001	0.004	0.072	0.053	0.017	0
190	370	270	0.109	0.029	0.031	0.124	0.07	0.119	0.647	0.046	0.035	0.121	0.066	0.327	0.274	0.597	0.029	0.209	0.235	0.114	0.094	0.217	0.002	0.001	0.018	0.012	0.489	0.053	0.41	0.434	0.282	0.408	0.316	0.056	0.06	0.397	0.165	0.453	0.321	0.192	0.001	0.022	0.242	0.001	0.007	0.162	0.04	0.008	0
210	370	270	0.087	0.023	0.03	0.122	0.067	0.078	0.371	0.05	0.057	0.108	0.08	0.242	0.256	0.179	0.033	0.191	0.234	0.118	0.084	0.188	0.002	0.005	0.02	0.016	0.281	0.054	0.359	0.357	0.234	0.368	0.29	0.057	0.054	0.361	0.148	0.396	0.275	0.177	0.002	0.021	0.071	0.001	0.004	0.074	0.048	0.019	0
230	370	270	0.077	0.042	0.038	0.114	0.082	0.057	0.377	0.03	0.062	0.092	0.081	0.18	0.192	0.176	0.036	0.163	0.204	0.093	0.073	0.164	0.002	0.003	0.02	0.023	0.12	0.05	0.3	0.304	0.187	0.332	0.255	0.055	0.047	0.314	0.13	0.334	0.238	0.16	0.002	0.021	0.024	0.001	0.003	0.077	0.049	0.001	0
250	370	270	0.065	0.06	0.034	0.098	0.102	0.057	0.26	0.027	0.05	0.077	0.066	0.143	0.156	0.171	0.028	0.153	0.226	0.091	0.064	0.159	0.003	0.002	0.019	0.027	0.084	0.05	0.25	0.276	0.158	0.3	0.216	0.043	0.042	0.285	0.115	0.293	0.209	0.147	0.001	0.018	0.014	0.001	0.006	0.138	0.047	0	0
270	370	270	0.054	0.07	0.021	0.071	0.065	0.037	0.206	0.02	0.045	0.062	0.053	0.105	0.124	0.13	0.02	0.118	0.24	0.089	0.057	0.125	0.002	0.001	0.014	0.046	0.049	0.045	0.199	0.232	0.136	0.261	0.174	0.039	0.035	0.263	0.117	0.241	0.177	0.122	0.001	0.017	0.007	0.001	0.003	0.163	0.034	0.001	0
290	370	270	0.042	0.054	0.016	0.059	0.066	0.025	0.12	0.013	0.033	0.051	0.055	0.076	0.119	0.118	0.017	0.098	0.34	0.094	0.054	0.127	0.002	0.001	0.011	0.119	0.041	0.03	0.175	0.215	0.117	0.234	0.134	0.012	0.029	0.253	0.086	0.217	0.155	0.111	0.001	0.011	0.004	0.001	0.001	0.221	0.017	0	0
310	370	270	0.03	0.04	0.015	0.058	0.049	0.029	0.04	0.015	0.028	0.053	0.055	0.065	0.115	0.14	0.016	0.103	0.347	0.113	0.05	0.147	0.002	0.002	0.011	0.048	0.07	0.03	0.161	0.197	0.11	0.214	0.121	0.004	0.028	0.25	0.075	0.209	0.148	0.106	0.006	0.004	0.004	0.001	0.001	0.211	0.01	0.003	0
70	370	290	0.23	0.091	0.432	0.161	0.123	0.032	0.005	0.548	0.038	0.103	0.051	0.451	0.477	0.344	0.033	0.22	0.506	0.275	0.102	0.267	0.009	0.003	0.029	0.01	0.011	0.049	0.54	0.62	0.348	0.479	0.454	0.083	0.073	0.401	0.278	0.456	0.49	0.213	0.321	0.033	0.35	0.003	0.047	0.163	0.011	0.005	0.005
90	370	290	0.276	0.043	0.6	0.221	0.122	0.051	0.015	0.887	0.038	0.159	0.058	0.689	0.488	0.34	0.042	0.292	0.869	0.126	0.132	0.398	0.019	0.007	0.034	0.019	0.011	0.058	0.734	0.781	0.447	0.594	0.604	0.561	0.093	0.554	0.324	0.619	0.763	0.273	0.323	0.031	0.408	0.002	0.012	0.246	0.01	0	0.003
110	370	290	0.26	0.035	0.546	0.191	0.114	0.061	0.089	0.864	0.038	0.145	0.046	0.706	0.432	0.179	0.037	0.297	0.82	0.255	0.121	0.351	0.01	0.009	0.043	0.051	0.059	0.175	0.735	0.663	0.45	0.605	0.637	1	0.108	0.583	0.316	0.646	0.682	0.31	0.252	0.022	0.265	0.001	0.005	0.145	0.02	0	0
130	370	290	0.221	0.034	0.126	0.19	0.127	0.074	0.465	0.459	0.038	0.167	0.049	0.561	0.328	0.119	0.029	0.278	0.382	0.33	0.112	0.266	0.006	0.003	0.035	0.021	0.493	0.067	0.626	0.611	0.41	0.536	0.719	0.304	0.085	0.541	0.257	0.636	0.519	0.292	0.14	0.034	0.305	0.002	0.002	0.011	0.041	0.001	0.006
150	370	290	0.167	0.038	0.039	0.186	0.103	0.062	0.783	0.074	0.025	0.14	0.061	0.389	0.308	0.193	0.024	0.25	0.223	0.114	0.099	0.237	0.004	0.001	0.029	0.01	0.601	0.051	0.547	0.557	0.356	0.487	0.454	0.151	0.074	0.478	0.199	0.55	0.443	0.245	0.014	0.03	0.272	0.002	0.004	0.013	0.068	0.012	0.003
170	370	290	0.119	0.023	0.031	0.14	0.128	0.09	0.671	0.06	0.039	0.114	0.056	0.305	0.222	0.45	0.021	0.213	0.202	0.104	0.087	0.207	0.002	0.001	0.021	0.016	0.48	0.047	0.454	0.549	0.313	0.417	0.353	0.06	0.062	0.408	0.162	0.451	0.345	0.194	0.001	0.03	0.284	0.001	0.008	0.073	0.038	0.004	0
190	370	290	0.091	0.02	0.028	0.123	0.063	0.072	0.516	0.069	0.041	0.096	0.054	0.262	0.29	0.2	0.019	0.197	0.235	0.096	0.084	0.192	0.002	0.001	0.017	0.012	0.345	0.054	0.405	0.389	0.278	0.395	0.318	0.064	0.057	0.379	0.152	0.429	0.304	0.182	0.001	0.024	0.174	0.001	0.003	0.075	0.044	0.007	0
210	370	290	0.076	0.027	0.026	0.12	0.054	0.067	0.634	0.036	0.031	0.087	0.055	0.177	0.218	0.104	0.021	0.179	0.212	0.154	0.078	0.168	0.002	0.001	0.015	0.012	0.095	0.045	0.367	0.348	0.243	0.366	0.3	0.075	0.052	0.371	0.142	0.387	0.272	0.17	0.001	0.023	0.029	0.001	0.002	0.018	0.055	0.006	0.001
230	370	290	0.063	0.033	0.025	0.097	0.058	0.05	0.56	0.022	0.027	0.07	0.051	0.12	0.156	0.124	0.021	0.144	0.16	0.1	0.067	0.14	0.001	0.001	0.015	0.016	0.029	0.041	0.292	0.292	0.187	0.324	0.238	0.057	0.043	0.318	0.12	0.324	0.219	0.141	0.001	0.018	0.004	0.002	0.003	0.026	0.053	0.004	0
250	370	290	0.056	0.053	0.02	0.067	0.077	0.026	0.397	0.02	0.036	0.055	0.043	0.081	0.111	0.109	0.016	0.112	0.127	0.098	0.053	0.111	0.002	0.001	0.013	0.02	0.017	0.039	0.212	0.232	0.132	0.266	0.176	0.03	0.034	0.257	0.098	0.24	0.17	0.116	0	0.015	0.002	0.001	0.002	0.074	0.04	0	0
270	370	290	0.049	0.045	0.013	0.052	0.051	0.021	0.267	0.014	0.034	0.046	0.039	0.073	0.094	0.09	0.014	0.09	0.148	0.126	0.045	0.093	0.002	0.001	0.012	0.033	0.023	0.03	0.159	0.187	0.107	0.216	0.141	0.018	0.027	0.219	0.104	0.19	0.135	0.097	0.001	0.013	0.001	0.001	0.001	0.129	0.025	0	0
290	370	290	0.038	0.032	0.013	0.05	0.08	0.02	0.081	0.01	0.03	0.045	0.052	0.071	0.108	0.1	0.016	0.081	0.27	0.113	0.045	0.098	0.002	0.001	0.009	0.07	0.032	0.027	0.139	0.177	0.092	0.196	0.114	0.007	0.024	0.212	0.074	0.185	0.127	0.098	0.001	0.007	0.003	0.001	0.001	0.2	0.01	0	0
310	370	290	0.027	0.043	0.013	0.058	0.058	0.023	0.021	0.016	0.02	0.047	0.053	0.052	0.105	0.125	0.015	0.087	0.328	0.109	0.045	0.103	0.001	0.001	0.009	0.025	0.041	0.03	0.143	0.184	0.094	0.198	0.112	0.003	0.024	0.229	0.075	0.196	0.134	0.099	0.003	0.003	0.004	0.001	0	0.221	0.01	0	0
330	370	290	0.025	0.039	0.012	0.056	0.031	0.02	0.011	0.01	0.02	0.043	0.05	0.035	0.072	0.117	0.012	0.121	0.289	0.135	0.042	0.089	0.001	0.001	0.008	0.002	0.037	0.031	0.126	0.164	0.088	0.169	0.1	0.001	0.023	0.217	0.063	0.167	0.122	0.088	0.004	0	0.001	0	0.004	0.191	0.009	0.001	0
350	370	290	0.023	0.04	0.007	0.046	0.039	0.017	0.002	0.007	0.012	0.015	0.02	0.021	0.006	0.05	0	0.113	0.163	0.193	0.028	0.081	0.001	0.002	0	0.002	0.032	0.033	0.104	0.13	0.074	0.161	0.094	0	0.022	0.2	0.061	0.141	0.093	0.084	0	0	0.001	0	0.004	0.107	0.006	0	0
150	390	150	0.148	0.109	0.592	0.156	0.099	0.052	0.018	0.404	0.2	0.28	0.127	0.663	0.492	0.524	0.08	0.246	0.691	0.27	0.099	0.317	0.016	0.021	0.066	0.025	0.162	0.11	0.484	0.528	0.609	0.501	0.477	0.341	0.105	0.456	0.193	0.489	0.471	0.276	0.045	0.013	0.254	0.002	0.003	0.369	0.008	0	0
170	390	150	0.155	0.081	0.639	0.196	0.114	0.058	0.028	0.479	0.157	0.237	0.139	0.632	0.599	0.714	0.074	0.276	0.784	0.29	0.119	0.31	0.018	0.021	0.083	0.042	0.093	0.106	0.552	0.65	0.45	0.593	0.466	0.254	0.121	0.525	0.224	0.573	0.648	0.305	0.046	0.019	0.333	0.002	0.005	0.327	0.01	0.002	0
190	390	150	0.121	0.049	0.564	0.213	0.111	0.056	0.032	0.44	0.113	0.21	0.136	0.507	0.591	0.842	0.068	0.274	0.778	0.175	0.125	0.29	0.021	0.028	0.064	0.048	0.025	0.07	0.564	0.62	0.383	0.605	0.413	0.099	0.113	0.501	0.221	0.588	0.801	0.305	0.041	0.019	0.307	0.002	0.002	0.281	0.009	0	0
210	390	150	0.073	0.024	0.537	0.177	0.055	0.051	0.01	0.324	0.086	0.151	0.123	0.399	0.477	0.708	0.062	0.228	0.659	0.253	0.106	0.239	0.017	0.016	0.043	0.015	0.01	0.081	0.443	0.439	0.316	0.497	0.364	0.115	0.086	0.438	0.174	0.499	0.497	0.257	0.042	0.01	0.249	0.001	0.002	0.136	0.006	0	0
130	390	170	0.296	0.138	0.7	0.224	0.232	0.08	0.021	0.699	0.287	0.313	0.111	0.768	0.457	0.58	0.084	0.339	0.827	0.405	0.136	0.383	0.021	0.016	0.096	0.021	0.223	0.176	0.712	0.662	0.977	0.695	0.631	0.687	0.134	0.599	0.267	0.705	0.734	0.371	0.062	0.041	0.296	0.003	0.019	0.44	0.032	0	0
150	390	170	0.266	0.114	0.709	0.231	0.177	0.074	0.039	0.696	0.227	0.296	0.135	0.72	0.529	0.729	0.081	0.368	0.842	0.267	0.148	0.377	0.017	0.014	0.117	0.03	0.175	0.175	0.725	0.731	0.759	0.703	0.649	0.603	0.148	0.625	0.283	0.763	0.768	0.394	0.047	0.047	0.33	0.002	0.016	0.359	0.035	0	0
170	390	170	0.222	0.067	0.644	0.221	0.151	0.078	0.053	0.607	0.141	0.264	0.136	0.627	0.544	0.816	0.082	0.356	0.882	0.3	0.147	0.34	0.019	0.017	0.128	0.042	0.07	0.152	0.681	0.74	0.502	0.696	0.592	0.322	0.144	0.622	0.273	0.722	0.81	0.381	0.04	0.04	0.323	0.003	0.008	0.289	0.027	0.001	0
190	390	170	0.183	0.051	0.435	0.204	0.145	0.062	0.067	0.42	0.114	0.229	0.143	0.514	0.473	0.731	0.081	0.323	0.743	0.316	0.14	0.312	0.019	0.016	0.093	0.058	0.044	0.111	0.617	0.679	0.439	0.638	0.552	0.138	0.116	0.568	0.253	0.685	0.776	0.367	0.04	0.036	0.234	0.002	0.011	0.258	0.027	0.005	0
210	390	170	0.161	0.038	0.383	0.176	0.112	0.056	0.085	0.315	0.099	0.185	0.135	0.433	0.442	0.773	0.081	0.294	0.637	0.286	0.126	0.316	0.009	0.018	0.07	0.076	0.044	0.086	0.547	0.52	0.38	0.607	0.493	0.076	0.092	0.533	0.226	0.608	0.616	0.348	0.052	0.034	0.202	0.002	0.014	0.19	0.027	0.001	0
230	390	170	0.118	0.04	0.359	0.161	0.104	0.048	0.084	0.267	0.146	0.148	0.116	0.371	0.475	0.745	0.058	0.272	0.52	0.126	0.109	0.279	0.005	0.011	0.055	0.05	0.052	0.08	0.452	0.463	0.299	0.514	0.363	0.047	0.077	0.437	0.185	0.509	0.561	0.283	0.022	0.028	0.213	0.002	0.006	0.183	0.022	0	0
250	390	170	0.101	0.049	0.251	0.116	0.122	0.048	0.07	0.168	0.143	0.087	0.07	0.286	0.396	0.639	0.032	0.263	0.306	0.113	0.092	0.303	0.005	0.01	0.039	0.046	0.039	0.084	0.346	0.387	0.235	0.449	0.255	0.023	0.06	0.36	0.153	0.407	0.365	0.211	0.012	0.024	0.208	0.002	0.008	0.088	0.024	0	0
270	390	170	0.074	0.042	0.268	0.098	0.105	0.065	0.072	0.128	0.128	0.083	0.068	0.285	0.386	0.774	0.021	0.172	0.339	0.088	0.087	0.45	0.003	0.032	0.024	0.024	0.049	0.072	0.286	0.337	0.191	0.364	0.207	0.012	0.05	0.328	0.138	0.38	0.403	0.184	0.01	0.016	0.212	0.001	0.002	0.04	0.008	0.002	0
110	390	190	0.36	0.137	0.721	0.234	0.244	0.079	0.033	0.806	0.312	0.278	0.087	0.828	0.487	0.521	0.072	0.363	0.85	0.34	0.145	0.418	0.014	0.01	0.085	0.025	0.232	0.221	0.775	0.747	0.837	0.743	0.581	0.73	0.149	0.609	0.288	0.721	0.767	0.37	0.15	0.048	0.385	0.002	0.023	0.459	0.036	0	0
130	390	190	0.309	0.107	0.701	0.247	0.254	0.077	0.042	0.756	0.226	0.284	0.103	0.735	0.5	0.724	0.075	0.372	0.897	0.372	0.151	0.374	0.013	0.011	0.108	0.028	0.16	0.148	0.774	0.722	0.771	0.714	0.591	0.723	0.138	0.637	0.292	0.78	0.841	0.376	0.105	0.039	0.351	0.002	0.018	0.349	0.034	0	0
150	390	190	0.277	0.073	0.655	0.219	0.212	0.085	0.09	0.642	0.106	0.276	0.126	0.639	0.484	0.832	0.078	0.357	0.884	0.332	0.151	0.348	0.014	0.013	0.133	0.052	0.074	0.128	0.711	0.725	0.524	0.683	0.605	0.508	0.132	0.611	0.282	0.771	0.884	0.389	0.076	0.041	0.292	0.002	0.016	0.271	0.036	0	0
170	390	190	0.244	0.053	0.45	0.203	0.169	0.072	0.125	0.425	0.108	0.263	0.136	0.538	0.459	0.689	0.09	0.331	0.723	0.211	0.141	0.35	0.014	0.016	0.119	0.113	0.044	0.113	0.654	0.699	0.457	0.639	0.595	0.196	0.107	0.557	0.262	0.699	0.789	0.36	0.058	0.035	0.212	0.003	0.009	0.268	0.038	0.006	0
190	390	190	0.177	0.041	0.247	0.209	0.129	0.06	0.264	0.201	0.087	0.22	0.14	0.455	0.396	0.525	0.092	0.316	0.563	0.137	0.13	0.314	0.011	0.025	0.083	0.114	0.049	0.082	0.587	0.65	0.403	0.582	0.525	0.095	0.09	0.52	0.24	0.67	0.614	0.33	0.055	0.029	0.167	0.002	0.025	0.218	0.038	0.007	0
210	390	190	0.158	0.049	0.219	0.18	0.142	0.058	0.283	0.171	0.104	0.173	0.137	0.414	0.401	0.497	0.081	0.283	0.501	0.134	0.113	0.271	0.005	0.017	0.067	0.059	0.095	0.078	0.491	0.487	0.332	0.527	0.387	0.075	0.084	0.455	0.204	0.567	0.532	0.29	0.025	0.03	0.148	0.002	0.013	0.217	0.035	0	0
230	390	190	0.122	0.053	0.205	0.157	0.114	0.068	0.264	0.17	0.109	0.136	0.108	0.366	0.406	0.511	0.057	0.249	0.426	0.122	0.101	0.234	0.005	0.008	0.05	0.041	0.14	0.072	0.408	0.426	0.275	0.467	0.311	0.044	0.072	0.396	0.175	0.49	0.466	0.238	0.012	0.023	0.166	0.001	0.007	0.203	0.025	0.002	0.001
250	390	190	0.094	0.048	0.179	0.138	0.108	0.12	0.234	0.125	0.122	0.094	0.078	0.335	0.425	0.623	0.033	0.219	0.349	0.104	0.095	0.362	0.004	0.015	0.036	0.04	0.146	0.065	0.356	0.389	0.245	0.425	0.264	0.033	0.057	0.37	0.159	0.439	0.448	0.232	0.011	0.026	0.201	0.001	0.003	0.089	0.024	0.01	0.001
270	390	190	0.069	0.036	0.249	0.124	0.077	0.128	0.202	0.154	0.13	0.087	0.071	0.329	0.357	0.86	0.026	0.178	0.484	0.083	0.093	0.511	0.002	0.02	0.027	0.043	0.077	0.06	0.306	0.348	0.214	0.382	0.23	0.016	0.048	0.353	0.143	0.391	0.519	0.214	0.011	0.02	0.188	0.001	0.002	0.073	0.015	0	0
290	390	190	0.049	0.033	0.201	0.114	0.067	0.144	0.122	0.14	0.094	0.073	0.065	0.275	0.29	0.648	0.022	0.147	0.463	0.075	0.083	0.432	0.002	0.021	0.02	0.042	0.071	0.053	0.247	0.294	0.175	0.326	0.194	0.011	0.043	0.327	0.131	0.322	0.469	0.183	0.01	0.012	0.138	0.001	0.002	0.085	0.011	0	0
90	390	210	0.425	0.147	0.751	0.245	0.242	0.072	0.035	0.864	0.283	0.243	0.081	0.898	0.462	0.476	0.051	0.379	0.91	0.211	0.148	0.424	0.016	0.018	0.085	0.034	0.205	0.229	0.792	0.803	0.675	0.804	0.627	0.721	0.147	0.594	0.322	0.725	0.783	0.343	0.262	0.047	0.511	0.002	0.021	0.462	0.025	0	0
110	390	210	0.369	0.107	0.754	0.236	0.221	0.075	0.039	0.843	0.265	0.241	0.082	0.836	0.477	0.669	0.061	0.39	0.945	0.183	0.152	0.403	0.013	0.014	0.093	0.022	0.158	0.204	0.798	0.828	0.705	0.743	0.608	0.722	0.146	0.619	0.305	0.762	0.837	0.331	0.213	0.047	0.458	0.002	0.016	0.385	0.029	0	0
130	390	210	0.315	0.072	0.687	0.233	0.22	0.078	0.073	0.728	0.107	0.257	0.1	0.72	0.489	0.821	0.075	0.365	0.877	0.191	0.147	0.352	0.014	0.015	0.105	0.031	0.091	0.133	0.728	0.728	0.519	0.68	0.538	0.551	0.135	0.595	0.279	0.771	0.866	0.329	0.133	0.035	0.363	0.002	0.007	0.261	0.034	0.001	0
150	390	210	0.266	0.061	0.44	0.214	0.196	0.07	0.183	0.46	0.109	0.294	0.13	0.585	0.431	0.641	0.091	0.334	0.709	0.268	0.138	0.342	0.013	0.011	0.099	0.043	0.077	0.101	0.663	0.676	0.467	0.656	0.572	0.219	0.108	0.565	0.26	0.715	0.849	0.333	0.075	0.031	0.199	0.003	0.011	0.254	0.042	0.019	0
170	390	210	0.201	0.04	0.212	0.205	0.125	0.056	0.519	0.207	0.066	0.265	0.126	0.453	0.439	0.463	0.069	0.307	0.445	0.156	0.132	0.352	0.01	0.011	0.069	0.06	0.055	0.07	0.602	0.663	0.429	0.607	0.576	0.127	0.098	0.54	0.279	0.685	0.74	0.332	0.041	0.032	0.153	0.003	0.006	0.198	0.044	0.001	0.001
190	390	210	0.161	0.043	0.105	0.242	0.141	0.064	0.551	0.084	0.077	0.227	0.169	0.435	0.398	0.38	0.093	0.289	0.382	0.12	0.124	0.276	0.005	0.016	0.061	0.083	0.125	0.074	0.536	0.589	0.369	0.556	0.425	0.08	0.09	0.495	0.239	0.618	0.519	0.287	0.019	0.026	0.123	0.003	0.006	0.179	0.045	0	0
210	390	210	0.133	0.042	0.107	0.192	0.14	0.068	0.518	0.105	0.07	0.164	0.129	0.415	0.373	0.392	0.066	0.258	0.366	0.121	0.108	0.237	0.003	0.014	0.051	0.049	0.159	0.07	0.458	0.436	0.304	0.491	0.345	0.057	0.083	0.429	0.193	0.531	0.442	0.249	0.02	0.024	0.129	0.002	0.008	0.145	0.032	0	0
230	390	210	0.107	0.041	0.099	0.162	0.106	0.076	0.433	0.105	0.081	0.11	0.092	0.355	0.34	0.338	0.046	0.225	0.33	0.102	0.094	0.217	0.003	0.006	0.038	0.038	0.237	0.067	0.381	0.39	0.251	0.47	0.288	0.051	0.067	0.374	0.164	0.445	0.368	0.21	0.011	0.021	0.155	0.001	0.004	0.117	0.038	0.009	0.004
250	390	210	0.091	0.034	0.104	0.124	0.106	0.137	0.386	0.094	0.087	0.095	0.08	0.327	0.348	0.519	0.027	0.186	0.383	0.09	0.087	0.307	0.003	0.009	0.026	0.052	0.26	0.057	0.325	0.348	0.222	0.404	0.245	0.032	0.052	0.348	0.148	0.389	0.43	0.198	0.008	0.02	0.178	0.001	0.003	0.078	0.02	0.002	0
270	390	210	0.062	0.03	0.169	0.12	0.063	0.146	0.255	0.13	0.084	0.083	0.071	0.3	0.316	0.708	0.024	0.162	0.493	0.08	0.087	0.425	0.002	0.014	0.022	0.062	0.115	0.059	0.282	0.317	0.192	0.361	0.216	0.015	0.045	0.332	0.134	0.352	0.51	0.194	0.01	0.019	0.167	0.001	0.002	0.097	0.015	0	0
290	390	210	0.048	0.032	0.163	0.104	0.059	0.132	0.159	0.126	0.08	0.071	0.065	0.242	0.265	0.586	0.021	0.138	0.48	0.072	0.078	0.397	0.002	0.016	0.018	0.068	0.078	0.05	0.23	0.279	0.167	0.323	0.19	0.013	0.04	0.316	0.127	0.305	0.457	0.172	0.008	0.014	0.124	0.002	0.006	0.115	0.012	0	0
310	390	210	0.04	0.031	0.102	0.067	0.055	0.065	0.064	0.09	0.061	0.049	0.051	0.137	0.169	0.326	0.019	0.128	0.276	0.082	0.058	0.228	0.002	0.008	0.015	0.033	0.042	0.043	0.163	0.204	0.122	0.249	0.147	0.008	0.035	0.264	0.086	0.226	0.276	0.116	0.004	0.005	0.055	0.004	0.017	0.088	0.026	0	0
70	390	230	0.432	0.116	0.639	0.206	0.22	0.053	0.049	0.703	0.213	0.189	0.075	0.795	0.499	0.394	0.038	0.278	0.768	0.311	0.111	0.324	0.017	0.027	0.059	0.02	0.137	0.132	0.603	0.663	0.466	0.56	0.447	0.386	0.113	0.441	0.255	0.537	0.583	0.283	0.27	0.019	0.464	0.002	0.009	0.387	0.012	0	0
90	390	230	0.41	0.123	0.809	0.25	0.252	0.069	0.022	1	0.27	0.212	0.071	0.88	0.532	0.582	0.041	0.372	0.969	0.178	0.143	0.382	0.014	0.02	0.071	0.029	0.15	0.125	0.761	0.861	0.617	0.691	0.592	0.514	0.128	0.597	0.329	0.701	0.809	0.305	0.281	0.036	0.568	0.002	0.016	0.414	0.02	0	0
110	390	230	0.345	0.085	0.74	0.206	0.211	0.075	0.063	0.841	0.126	0.224	0.073	0.756	0.477	0.744	0.06	0.36	0.907	0.144	0.143	0.363	0.016	0.013	0.082	0.027	0.077	0.185	0.742	0.802	0.522	0.686	0.581	0.422	0.13	0.59	0.292	0.708	0.868	0.298	0.232	0.03	0.474	0.002	0.009	0.301	0.028	0	0
130	390	230	0.282	0.062	0.528	0.203	0.19	0.069	0.118	0.594	0.109	0.263	0.094	0.612	0.406	0.831	0.084	0.334	0.736	0.161	0.136	0.371	0.015	0.012	0.078	0.027	0.07	0.12	0.703	0.686	0.477	0.618	0.525	0.194	0.11	0.569	0.256	0.701	0.937	0.3	0.101	0.028	0.281	0.002	0.016	0.268	0.041	0	0
150	390	230	0.202	0.033	0.253	0.185	0.135	0.054	0.427	0.361	0.061	0.25	0.095	0.479	0.384	0.477	0.055	0.3	0.462	0.222	0.125	0.314	0.01	0.006	0.057	0.03	0.131	0.089	0.62	0.641	0.427	0.562	0.51	0.159	0.091	0.534	0.229	0.682	0.709	0.308	0.076	0.026	0.18	0.001	0.023	0.152	0.058	0.009	0
170	390	230	0.161	0.031	0.084	0.207	0.113	0.06	0.714	0.068	0.058	0.208	0.112	0.394	0.342	0.259	0.057	0.277	0.252	0.115	0.119	0.268	0.004	0.004	0.048	0.038	0.228	0.073	0.533	0.622	0.38	0.529	0.421	0.106	0.075	0.503	0.213	0.609	0.507	0.286	0.013	0.03	0.119	0.002	0.007	0.117	0.059	0.027	0.001
190	390	230	0.146	0.043	0.077	0.203	0.13	0.068	0.637	0.053	0.074	0.173	0.131	0.39	0.322	0.33	0.069	0.248	0.258	0.118	0.104	0.231	0.002	0.008	0.043	0.043	0.256	0.07	0.458	0.522	0.304	0.474	0.363	0.08	0.07	0.437	0.189	0.544	0.401	0.242	0.007	0.027	0.109	0.002	0.004	0.134	0.05	0.001	0
210	390	230	0.122	0.042	0.063	0.182	0.131	0.072	0.589	0.057	0.067	0.134	0.119	0.361	0.315	0.354	0.057	0.222	0.252	0.115	0.094	0.207	0.003	0.008	0.033	0.037	0.281	0.063	0.39	0.392	0.258	0.443	0.312	0.051	0.066	0.392	0.163	0.47	0.366	0.213	0.006	0.027	0.124	0.001	0.004	0.111	0.038	0.002	0
230	390	230	0.102	0.032	0.058	0.15	0.107	0.1	0.51	0.068	0.06	0.113	0.093	0.318	0.309	0.306	0.039	0.185	0.3	0.086	0.083	0.186	0.003	0.006	0.026	0.034	0.279	0.062	0.325	0.343	0.214	0.406	0.255	0.031	0.06	0.346	0.144	0.384	0.312	0.186	0.008	0.024	0.133	0.001	0.003	0.093	0.026	0.004	0
250	390	230	0.076	0.033	0.065	0.182	0.101	0.139	0.337	0.076	0.059	0.086	0.074	0.256	0.3	0.284	0.025	0.162	0.38	0.074	0.074	0.178	0.006	0.009	0.021	0.039	0.19	0.061	0.274	0.314	0.185	0.343	0.214	0.021	0.052	0.315	0.131	0.339	0.305	0.168	0.011	0.019	0.104	0.001	0.002	0.078	0.019	0.005	0
270	390	230	0.056	0.037	0.073	0.144	0.054	0.123	0.252	0.067	0.054	0.077	0.069	0.212	0.245	0.325	0.02	0.143	0.402	0.069	0.07	0.218	0.008	0.006	0.019	0.085	0.121	0.062	0.242	0.278	0.169	0.314	0.189	0.014	0.052	0.303	0.138	0.313	0.312	0.153	0.009	0.017	0.076	0.001	0.002	0.117	0.016	0.002	0
290	390	230	0.044	0.042	0.059	0.084	0.054	0.082	0.164	0.053	0.085	0.07	0.069	0.15	0.178	0.251	0.023	0.124	0.432	0.074	0.067	0.209	0.005	0.004	0.016	0.165	0.053	0.043	0.204	0.246	0.145	0.289	0.166	0.01	0.039	0.289	0.115	0.277	0.276	0.134	0.004	0.013	0.039	0.001	0.001	0.213	0.013	0	0
310	390	230	0.036	0.038	0.037	0.062	0.04	0.041	0.095	0.034	0.063	0.052	0.057	0.097	0.128	0.145	0.019	0.108	0.342	0.084	0.056	0.17	0.003	0.002	0.014	0.111	0.037	0.038	0.168	0.209	0.126	0.248	0.141	0.007	0.031	0.271	0.086	0.225	0.218	0.112	0.001	0.006	0.015	0.001	0.007	0.185	0.013	0	0
70	390	250	0.489	0.119	0.686	0.235	0.285	0.048	0.017	0.928	0.159	0.189	0.06	0.766	0.662	0.557	0.028	0.301	0.812	0.339	0.123	0.316	0.017	0.031	0.05	0.03	0.094	0.141	0.685	0.71	0.5	0.576	0.5	0.16	0.106	0.475	0.296	0.542	0.668	0.239	0.403	0.033	0.541	0.002	0.006	0.341	0.016	0.003	0
90	390	250	0.361	0.089	0.736	0.24	0.247	0.061	0.043	0.96	0.149	0.207	0.06	0.772	0.486	0.618	0.042	0.346	0.914	0.233	0.134	0.401	0.019	0.019	0.048	0.03	0.064	0.085	0.739	0.861	0.518	0.602	0.532	0.16	0.116	0.561	0.307	0.646	0.823	0.272	0.303	0.029	0.589	0.002	0.009	0.35	0.021	0.003	0
110	390	250	0.318	0.07	0.678	0.198	0.194	0.065	0.051	0.746	0.112	0.223	0.069	0.654	0.407	0.692	0.054	0.345	0.812	0.247	0.141	0.402	0.026	0.015	0.049	0.032	0.048	0.113	0.732	0.766	0.519	0.616	0.561	0.128	0.117	0.58	0.278	0.68	0.909	0.278	0.191	0.03	0.407	0.002	0.012	0.313	0.048	0.001	0
130	390	250	0.226	0.037	0.447	0.186	0.15	0.071	0.181	0.585	0.054	0.217	0.067	0.539	0.346	0.634	0.051	0.321	0.591	0.209	0.131	0.352	0.021	0.01	0.041	0.017	0.093	0.085	0.643	0.655	0.47	0.571	0.54	0.142	0.098	0.541	0.234	0.675	0.806	0.29	0.132	0.033	0.231	0.002	0.011	0.232	0.049	0	0
150	390	250	0.192	0.03	0.077	0.217	0.121	0.067	0.689	0.187	0.03	0.191	0.073	0.427	0.359	0.238	0.04	0.268	0.248	0.188	0.119	0.269	0.007	0.002	0.034	0.014	0.408	0.062	0.547	0.661	0.392	0.533	0.451	0.148	0.075	0.501	0.215	0.609	0.51	0.258	0.027	0.032	0.158	0.001	0.013	0.051	0.074	0.007	0
170	390	250	0.146	0.028	0.047	0.195	0.108	0.08	0.766	0.042	0.049	0.156	0.083	0.404	0.326	0.302	0.043	0.234	0.2	0.118	0.108	0.227	0.004	0.002	0.029	0.025	0.4	0.067	0.458	0.564	0.31	0.472	0.343	0.104	0.064	0.434	0.184	0.518	0.387	0.239	0.007	0.028	0.14	0.002	0.004	0.064	0.06	0.016	0
190	390	250	0.122	0.031	0.045	0.176	0.112	0.07	0.572	0.038	0.066	0.135	0.102	0.362	0.286	0.288	0.053	0.213	0.203	0.125	0.095	0.214	0.004	0.003	0.024	0.025	0.372	0.079	0.396	0.48	0.258	0.44	0.309	0.08	0.06	0.389	0.163	0.463	0.328	0.236	0.005	0.023	0.128	0.002	0.004	0.094	0.051	0.021	0
210	390	250	0.104	0.037	0.044	0.158	0.117	0.075	0.533	0.046	0.065	0.116	0.102	0.324	0.267	0.332	0.052	0.187	0.221	0.09	0.083	0.188	0.003	0.004	0.023	0.03	0.322	0.06	0.34	0.346	0.216	0.388	0.269	0.052	0.055	0.348	0.142	0.399	0.28	0.19	0.003	0.023	0.113	0.001	0.004	0.097	0.043	0.002	0
230	390	250	0.09	0.039	0.049	0.14	0.099	0.084	0.415	0.051	0.053	0.096	0.089	0.271	0.263	0.28	0.041	0.167	0.247	0.08	0.073	0.168	0.003	0.005	0.021	0.035	0.228	0.061	0.291	0.307	0.183	0.344	0.234	0.033	0.05	0.315	0.126	0.347	0.24	0.162	0.003	0.018	0.071	0.001	0.002	0.079	0.032	0.009	0
250	390	250	0.068	0.043	0.039	0.166	0.098	0.093	0.265	0.041	0.052	0.076	0.064	0.201	0.24	0.171	0.025	0.155	0.27	0.085	0.066	0.165	0.005	0.008	0.02	0.043	0.147	0.049	0.247	0.267	0.16	0.3	0.194	0.022	0.046	0.295	0.114	0.306	0.218	0.145	0.002	0.017	0.031	0.001	0.002	0.082	0.024	0.007	0
270	390	250	0.054	0.055	0.027	0.125	0.056	0.09	0.193	0.03	0.072	0.065	0.06	0.147	0.162	0.151	0.02	0.143	0.279	0.092	0.06	0.159	0.01	0.005	0.017	0.038	0.105	0.044	0.205	0.236	0.139	0.268	0.165	0.016	0.048	0.271	0.11	0.264	0.189	0.128	0.003	0.015	0.014	0.001	0.002	0.155	0.021	0	0
290	390	250	0.043	0.074	0.019	0.064	0.04	0.042	0.116	0.024	0.068	0.054	0.052	0.098	0.119	0.12	0.018	0.113	0.311	0.111	0.05	0.123	0.009	0.003	0.013	0.06	0.047	0.035	0.167	0.192	0.117	0.228	0.13	0.012	0.034	0.245	0.093	0.215	0.146	0.103	0.002	0.01	0.014	0.001	0.001	0.191	0.015	0	0
310	390	250	0.031	0.058	0.016	0.051	0.032	0.034	0.046	0.015	0.035	0.045	0.049	0.061	0.103	0.106	0.015	0.099	0.297	0.104	0.046	0.126	0.004	0.001	0.011	0.055	0.041	0.032	0.137	0.168	0.099	0.205	0.114	0.004	0.027	0.232	0.068	0.183	0.138	0.092	0.003	0.006	0.009	0.001	0.001	0.177	0.009	0	0
70	390	270	0.305	0.088	0.653	0.227	0.163	0.039	0.009	0.8	0.066	0.215	0.065	0.691	0.768	0.697	0.03	0.295	0.72	0.16	0.124	0.365	0.023	0.009	0.034	0.028	0.015	0.153	0.759	0.76	0.48	0.539	0.5	0.034	0.089	0.547	0.279	0.594	0.864	0.242	0.35	0.056	0.51	0.001	0.039	0.312	0.027	0.022	0.008
90	390	270	0.324	0.06	0.771	0.251	0.197	0.056	0.016	0.929	0.065	0.214	0.065	0.732	0.419	0.767	0.034	0.316	0.885	0.166	0.132	0.533	0.028	0.037	0.037	0.031	0.018	0.061	0.796	0.902	0.504	0.582	0.564	0.051	0.105	0.606	0.295	0.658	0.993	0.262	0.249	0.022	0.529	0.001	0.017	0.382	0.014	0.001	0
110	390	270	0.261	0.038	0.677	0.168	0.156	0.072	0.039	0.813	0.041	0.192	0.059	0.644	0.357	0.808	0.044	0.298	0.787	0.132	0.128	0.493	0.03	0.015	0.038	0.019	0.02	0.088	0.687	0.713	0.473	0.548	0.523	0.162	0.108	0.567	0.239	0.646	0.851	0.253	0.202	0.031	0.392	0.001	0.003	0.345	0.025	0	0
130	390	270	0.223	0.029	0.313	0.224	0.163	0.089	0.466	0.529	0.034	0.16	0.053	0.538	0.321	0.213	0.035	0.286	0.462	0.278	0.115	0.292	0.009	0.006	0.035	0.017	0.217	0.146	0.591	0.63	0.434	0.54	0.599	0.204	0.084	0.54	0.224	0.612	0.53	0.25	0.115	0.033	0.235	0.002	0.014	0.108	0.053	0	0.015
150	390	270	0.19	0.037	0.049	0.209	0.134	0.086	0.769	0.095	0.028	0.154	0.061	0.381	0.295	0.246	0.035	0.256	0.211	0.119	0.106	0.234	0.005	0.001	0.027	0.011	0.481	0.086	0.516	0.613	0.371	0.487	0.393	0.124	0.07	0.476	0.199	0.517	0.406	0.221	0.011	0.031	0.183	0.001	0.024	0.026	0.069	0.003	0.004
170	390	270	0.136	0.027	0.036	0.188	0.099	0.136	0.695	0.036	0.036	0.121	0.066	0.369	0.273	0.367	0.034	0.215	0.175	0.125	0.099	0.226	0.011	0.001	0.026	0.02	0.471	0.059	0.462	0.596	0.328	0.446	0.346	0.094	0.061	0.441	0.174	0.471	0.352	0.211	0.005	0.024	0.174	0.001	0.004	0.099	0.056	0.02	0
190	390	270	0.103	0.025	0.029	0.145	0.084	0.078	0.537	0.036	0.047	0.107	0.074	0.305	0.268	0.21	0.035	0.188	0.166	0.101	0.084	0.204	0.006	0.003	0.021	0.018	0.382	0.074	0.377	0.449	0.251	0.396	0.293	0.079	0.057	0.381	0.151	0.42	0.297	0.209	0.003	0.022	0.135	0.001	0.004	0.084	0.047	0.009	0
210	390	270	0.089	0.041	0.027	0.12	0.086	0.069	0.385	0.04	0.073	0.103	0.088	0.241	0.253	0.162	0.042	0.159	0.181	0.089	0.073	0.169	0.002	0.007	0.019	0.022	0.226	0.058	0.306	0.303	0.196	0.331	0.254	0.055	0.05	0.326	0.132	0.341	0.247	0.169	0.003	0.019	0.057	0.001	0.004	0.063	0.046	0.002	0
230	390	270	0.075	0.046	0.031	0.11	0.087	0.057	0.329	0.03	0.046	0.085	0.078	0.187	0.213	0.192	0.039	0.141	0.185	0.084	0.063	0.151	0.002	0.003	0.019	0.026	0.117	0.048	0.262	0.265	0.161	0.297	0.222	0.048	0.04	0.289	0.114	0.301	0.211	0.138	0.002	0.016	0.029	0.001	0.002	0.063	0.043	0	0
250	390	270	0.061	0.048	0.033	0.096	0.095	0.055	0.287	0.026	0.037	0.072	0.066	0.145	0.164	0.179	0.032	0.133	0.203	0.086	0.058	0.145	0.002	0.002	0.018	0.023	0.086	0.049	0.219	0.244	0.141	0.269	0.188	0.033	0.036	0.263	0.102	0.265	0.189	0.125	0.001	0.015	0.015	0.001	0.012	0.098	0.033	0	0
270	390	270	0.049	0.06	0.022	0.074	0.059	0.058	0.196	0.021	0.038	0.059	0.054	0.106	0.13	0.144	0.021	0.125	0.219	0.1	0.053	0.132	0.003	0.002	0.016	0.023	0.053	0.038	0.185	0.218	0.121	0.24	0.156	0.023	0.034	0.246	0.101	0.233	0.162	0.109	0.001	0.014	0.008	0.001	0.01	0.101	0.025	0	0
290	390	270	0.041	0.067	0.015	0.049	0.044	0.023	0.134	0.015	0.024	0.047	0.046	0.067	0.102	0.102	0.015	0.092	0.227	0.124	0.045	0.107	0.002	0.002	0.012	0.05	0.034	0.029	0.14	0.174	0.097	0.205	0.115	0.012	0.025	0.217	0.082	0.179	0.121	0.084	0	0.01	0.004	0.001	0.001	0.122	0.013	0	0
310	390	270	0.031	0.034	0.012	0.044	0.031	0.026	0.037	0.01	0.012	0.046	0.056	0.041	0.11	0.121	0.016	0.142	0.267	0.118	0.042	0.126	0.002	0.001	0.009	0.043	0.037	0.029	0.129	0.161	0.085	0.19	0.1	0.003	0.022	0.209	0.062	0.169	0.119	0.082	0.001	0.004	0.001	0	0.001	0.155	0.008	0	0
330	390	270	0.024	0.035	0.011	0.039	0.029	0.023	0.017	0.007	0.015	0.042	0.052	0.032	0.076	0.111	0.012	0.257	0.225	0.229	0.038	0.088	0.002	0.001	0.008	0.002	0.049	0.028	0.112	0.134	0.076	0.166	0.088	0.001	0.021	0.199	0.054	0.144	0.108	0.073	0.004	0	0.001	0	0.001	0.135	0.03	0	0
50	390	290	0.149	0.029	0.241	0.06	0.096	0.019	0.005	0.147	0.072	0.03	0.014	0.225	0.238	0.081	0.013	0.092	0.203	0.16	0.07	0.117	0.002	0.001	0.043	0.008	0.015	0.019	0.27	0.269	0.183	0.268	0.2	0.018	0.06	0.222	0.113	0.208	0.205	0.1	0.095	0.02	0.258	0.003	0.006	0.016	0.005	0.002	0.003
70	390	290	0.236	0.091	0.529	0.134	0.123	0.032	0.005	0.582	0.04	0.11	0.059	0.507	0.577	0.396	0.031	0.203	0.512	0.111	0.1	0.3	0.017	0.006	0.031	0.034	0.01	0.118	0.549	0.615	0.376	0.465	0.463	0.064	0.076	0.398	0.2	0.495	0.543	0.196	0.278	0.04	0.553	0.001	0.043	0.2	0.014	0.01	0.003
90	390	290	0.266	0.047	0.763	0.254	0.209	0.057	0.01	0.854	0.034	0.153	0.056	0.688	0.472	0.437	0.038	0.257	0.837	0.137	0.119	0.43	0.021	0.07	0.048	0.03	0.009	0.095	0.675	0.846	0.42	0.56	0.556	0.366	0.097	0.545	0.263	0.631	0.725	0.243	0.339	0.055	0.566	0.001	0.042	0.258	0.011	0.002	0.002
110	390	290	0.26	0.03	0.672	0.167	0.18	0.067	0.025	0.833	0.032	0.148	0.054	0.658	0.334	0.353	0.037	0.26	0.773	0.122	0.113	0.35	0.014	0.015	0.033	0.032	0.022	0.137	0.636	0.646	0.413	0.524	0.52	0.883	0.112	0.558	0.235	0.605	0.637	0.239	0.179	0.026	0.391	0.001	0.006	0.201	0.024	0	0
130	390	290	0.219	0.027	0.276	0.2	0.169	0.069	0.504	0.55	0.029	0.13	0.047	0.528	0.29	0.133	0.028	0.26	0.383	0.26	0.104	0.255	0.005	0.004	0.031	0.011	0.335	0.136	0.561	0.561	0.396	0.494	0.588	0.663	0.081	0.533	0.225	0.604	0.497	0.239	0.091	0.026	0.275	0.001	0.008	0.028	0.05	0.002	0
150	390	290	0.164	0.024	0.042	0.184	0.104	0.073	0.89	0.082	0.03	0.142	0.061	0.374	0.242	0.276	0.028	0.231	0.206	0.126	0.094	0.225	0.009	0.001	0.025	0.009	0.554	0.073	0.493	0.543	0.332	0.459	0.392	0.174	0.068	0.454	0.18	0.513	0.393	0.22	0.004	0.022	0.216	0.001	0.007	0.029	0.063	0.006	0
170	390	290	0.121	0.023	0.03	0.137	0.101	0.096	0.596	0.049	0.054	0.1	0.053	0.274	0.249	0.232	0.025	0.202	0.173	0.119	0.084	0.201	0.007	0.001	0.021	0.018	0.423	0.055	0.413	0.501	0.286	0.412	0.326	0.091	0.06	0.404	0.156	0.433	0.31	0.184	0.001	0.024	0.179	0.002	0.009	0.071	0.066	0.007	0
190	390	290	0.091	0.02	0.025	0.128	0.088	0.055	0.338	0.036	0.031	0.086	0.056	0.216	0.324	0.117	0.022	0.175	0.142	0.103	0.079	0.174	0.003	0.001	0.016	0.023	0.235	0.051	0.37	0.398	0.251	0.368	0.301	0.057	0.055	0.376	0.145	0.409	0.274	0.169	0.001	0.023	0.111	0.003	0.013	0.039	0.059	0.006	0
210	390	290	0.081	0.021	0.023	0.11	0.065	0.041	0.156	0.026	0.021	0.08	0.055	0.162	0.267	0.096	0.02	0.15	0.127	0.209	0.071	0.15	0.001	0.001	0.015	0.025	0.064	0.044	0.318	0.292	0.208	0.333	0.272	0.066	0.047	0.343	0.126	0.358	0.274	0.155	0.001	0.018	0.037	0.001	0.006	0.012	0.054	0	0
230	390	290	0.059	0.019	0.023	0.096	0.057	0.04	0.212	0.018	0.015	0.067	0.053	0.102	0.166	0.101	0.021	0.126	0.139	0.138	0.06	0.133	0.001	0.001	0.016	0.018	0.026	0.04	0.255	0.259	0.164	0.29	0.226	0.062	0.036	0.297	0.109	0.298	0.206	0.131	0.001	0.015	0.005	0.001	0.003	0.013	0.046	0.001	0
250	390	290	0.047	0.021	0.022	0.065	0.078	0.031	0.335	0.018	0.014	0.055	0.046	0.071	0.13	0.116	0.017	0.106	0.135	0.106	0.051	0.111	0.001	0.001	0.013	0.012	0.018	0.039	0.194	0.214	0.125	0.244	0.17	0.037	0.029	0.241	0.091	0.237	0.159	0.108	0	0.013	0.003	0.001	0.011	0.02	0.032	0	0
270	390	290	0.045	0.022	0.013	0.056	0.044	0.034	0.302	0.015	0.011	0.048	0.044	0.061	0.114	0.109	0.016	0.089	0.115	0.133	0.045	0.093	0.002	0.001	0.011	0.011	0.021	0.032	0.154	0.189	0.099	0.21	0.131	0.019	0.025	0.215	0.098	0.194	0.13	0.088	0.001	0.012	0.001	0.002	0.007	0.044	0.016	0	0
290	390	290	0.04	0.024	0.012	0.046	0.037	0.022	0.165	0.009	0.008	0.042	0.045	0.051	0.1	0.091	0.014	0.078	0.16	0.135	0.04	0.091	0.002	0.001	0.009	0.02	0.029	0.026	0.123	0.16	0.081	0.18	0.105	0.008	0.021	0.2	0.103	0.162	0.109	0.074	0	0.008	0.001	0	0	0.087	0.01	0	0
310	390	290	0.027	0.028	0.011	0.042	0.028	0.021	0.037	0.009	0.007	0.042	0.055	0.031	0.102	0.109	0.015	0.166	0.22	0.133	0.039	0.116	0.001	0.001	0.008	0.017	0.029	0.026	0.118	0.165	0.073	0.171	0.094	0.003	0.02	0.199	0.07	0.156	0.106	0.076	0.001	0.003	0.001	0.001	0	0.14	0.009	0	0
330	390	290	0.023	0.032	0.01	0.035	0.029	0.016	0.019	0.004	0.006	0.041	0.053	0.023	0.071	0.1	0.012	0.211	0.195	0.255	0.035	0.079	0.001	0.001	0.008	0.001	0.029	0.025	0.101	0.127	0.07	0.151	0.082	0.001	0.019	0.189	0.052	0.127	0.098	0.071	0.001	0	0.001	0	0	0.131	0.045	0	0
350	390	290	0.021	0.034	0.007	0.034	0.038	0.014	0.006	0.005	0.007	0.017	0.012	0.012	0.003	0.037	0	0.177	0.115	0.234	0.026	0.069	0.001	0.001	0.001	0.001	0.031	0.021	0.09	0.111	0.064	0.142	0.078	0	0.018	0.181	0.05	0.12	0.091	0.072	0	0	0.003	0	0.006	0.085	0.023	0	0
190	410	130	0.092	0.071	0.561	0.125	0.081	0.046	0.015	0.291	0.125	0.193	0.123	0.483	0.717	0.779	0.053	0.218	0.65	0.118	0.1	0.258	0.015	0.022	0.036	0.018	0.014	0.064	0.479	0.486	0.313	0.588	0.322	0.078	0.092	0.426	0.172	0.483	0.682	0.246	0.048	0.01	0.233	0.002	0.002	0.266	0.004	0	0
130	410	150	0.242	0.129	0.785	0.179	0.15	0.072	0.021	0.574	0.295	0.306	0.1	0.769	0.537	0.533	0.08	0.31	0.819	0.414	0.121	0.367	0.018	0.027	0.08	0.016	0.145	0.143	0.656	0.604	0.875	0.635	0.603	0.627	0.123	0.558	0.241	0.607	0.575	0.357	0.036	0.023	0.379	0.002	0.009	0.412	0.016	0	0
150	410	150	0.234	0.128	0.81	0.202	0.164	0.073	0.025	0.714	0.327	0.298	0.131	0.751	0.622	0.712	0.082	0.358	0.886	0.322	0.143	0.369	0.019	0.035	0.093	0.023	0.133	0.171	0.754	0.693	0.747	0.692	0.636	0.6	0.145	0.642	0.281	0.718	0.725	0.366	0.046	0.035	0.427	0.002	0.013	0.42	0.018	0	0
170	410	150	0.209	0.081	0.83	0.19	0.157	0.075	0.033	0.648	0.256	0.258	0.134	0.648	0.652	0.85	0.075	0.336	0.935	0.237	0.145	0.334	0.022	0.038	0.106	0.034	0.057	0.133	0.712	0.711	0.511	0.702	0.532	0.364	0.15	0.635	0.268	0.708	0.839	0.36	0.042	0.036	0.436	0.003	0.006	0.318	0.018	0.015	0
190	410	150	0.164	0.057	0.617	0.187	0.148	0.066	0.035	0.562	0.187	0.237	0.145	0.531	0.554	0.934	0.077	0.32	0.82	0.21	0.14	0.323	0.022	0.028	0.072	0.033	0.024	0.099	0.661	0.718	0.455	0.631	0.489	0.134	0.116	0.564	0.242	0.692	0.915	0.331	0.036	0.031	0.332	0.001	0.007	0.286	0.017	0.005	0
210	410	150	0.116	0.032	0.595	0.175	0.086	0.063	0.015	0.475	0.135	0.192	0.14	0.491	0.532	0.95	0.08	0.309	0.769	0.29	0.125	0.286	0.018	0.041	0.05	0.035	0.015	0.141	0.599	0.609	0.414	0.59	0.506	0.126	0.106	0.555	0.222	0.641	0.721	0.31	0.046	0.026	0.299	0.002	0.004	0.198	0.016	0	0
230	410	150	0.101	0.034	0.461	0.18	0.095	0.05	0.045	0.346	0.16	0.158	0.136	0.425	0.528	0.846	0.094	0.272	0.606	0.128	0.108	0.259	0.008	0.03	0.042	0.043	0.028	0.09	0.497	0.464	0.32	0.531	0.407	0.045	0.081	0.459	0.196	0.533	0.586	0.3	0.032	0.024	0.236	0.002	0.004	0.174	0.017	0.001	0
250	410	150	0.088	0.041	0.406	0.135	0.11	0.044	0.039	0.252	0.189	0.115	0.102	0.361	0.507	0.725	0.046	0.239	0.444	0.112	0.093	0.238	0.005	0.013	0.036	0.037	0.024	0.092	0.399	0.396	0.255	0.458	0.304	0.02	0.065	0.385	0.161	0.461	0.527	0.229	0.016	0.02	0.249	0.001	0.003	0.13	0.018	0.017	0
270	410	150	0.069	0.045	0.267	0.093	0.079	0.038	0.035	0.132	0.171	0.073	0.069	0.241	0.392	0.553	0.025	0.177	0.288	0.093	0.08	0.246	0.003	0.011	0.032	0.042	0.017	0.112	0.301	0.332	0.192	0.389	0.231	0.012	0.049	0.322	0.132	0.359	0.367	0.175	0.009	0.016	0.187	0.001	0.007	0.045	0.01	0.004	0
110	410	170	0.348	0.143	0.841	0.218	0.224	0.075	0.027	0.767	0.306	0.279	0.08	0.858	0.521	0.523	0.073	0.337	0.87	0.694	0.137	0.388	0.021	0.026	0.083	0.039	0.141	0.332	0.775	0.713	0.853	0.742	0.627	0.859	0.129	0.695	0.275	0.659	0.689	0.395	0.077	0.042	0.434	0.002	0.015	0.426	0.033	0	0
130	410	170	0.3	0.123	0.885	0.237	0.207	0.082	0.026	0.807	0.307	0.291	0.104	0.791	0.587	0.701	0.076	0.383	0.896	0.378	0.152	0.382	0.017	0.017	0.108	0.018	0.137	0.192	0.789	0.731	0.883	0.75	0.659	0.829	0.144	0.686	0.288	0.75	0.768	0.371	0.062	0.041	0.433	0.006	0.027	0.406	0.034	0	0
150	410	170	0.279	0.075	0.911	0.217	0.191	0.084	0.046	0.817	0.172	0.277	0.115	0.715	0.576	0.847	0.068	0.374	0.952	0.249	0.154	0.37	0.017	0.018	0.125	0.025	0.069	0.13	0.749	0.758	0.574	0.723	0.612	0.578	0.152	0.646	0.286	0.782	0.838	0.377	0.053	0.042	0.443	0.004	0.011	0.316	0.025	0	0
170	410	170	0.23	0.058	0.707	0.208	0.163	0.08	0.053	0.613	0.149	0.278	0.134	0.6	0.582	0.792	0.08	0.35	0.857	0.233	0.145	0.346	0.02	0.013	0.113	0.037	0.046	0.146	0.7	0.738	0.48	0.66	0.617	0.228	0.14	0.613	0.271	0.722	0.866	0.368	0.047	0.036	0.369	0.003	0.011	0.305	0.026	0	0
190	410	170	0.168	0.037	0.462	0.196	0.127	0.067	0.082	0.469	0.105	0.225	0.137	0.479	0.544	0.834	0.067	0.323	0.748	0.242	0.135	0.312	0.018	0.029	0.078	0.049	0.022	0.128	0.626	0.706	0.436	0.606	0.586	0.156	0.122	0.569	0.246	0.688	0.797	0.335	0.053	0.041	0.295	0.002	0.006	0.234	0.021	0.001	0
210	410	170	0.147	0.034	0.369	0.223	0.121	0.054	0.111	0.272	0.112	0.225	0.178	0.461	0.465	0.766	0.149	0.308	0.635	0.133	0.12	0.275	0.009	0.057	0.066	0.107	0.046	0.092	0.542	0.561	0.377	0.569	0.479	0.076	0.089	0.516	0.235	0.608	0.592	0.311	0.029	0.033	0.191	0.003	0.005	0.214	0.029	0	0
230	410	170	0.134	0.039	0.348	0.17	0.149	0.049	0.089	0.257	0.137	0.16	0.14	0.404	0.46	0.76	0.097	0.27	0.54	0.121	0.102	0.249	0.005	0.019	0.045	0.051	0.048	0.092	0.449	0.449	0.307	0.505	0.35	0.042	0.074	0.42	0.181	0.513	0.536	0.25	0.02	0.026	0.197	0.002	0.003	0.229	0.027	0	0
250	410	170	0.106	0.044	0.334	0.128	0.121	0.05	0.071	0.229	0.17	0.118	0.101	0.349	0.477	0.667	0.045	0.222	0.432	0.107	0.091	0.262	0.007	0.009	0.036	0.032	0.042	0.083	0.376	0.383	0.255	0.444	0.275	0.024	0.061	0.372	0.153	0.436	0.481	0.214	0.011	0.023	0.225	0.002	0.003	0.185	0.019	0	0
270	410	170	0.079	0.045	0.283	0.114	0.086	0.083	0.089	0.152	0.181	0.085	0.079	0.302	0.449	0.797	0.026	0.176	0.406	0.081	0.09	0.458	0.004	0.028	0.028	0.025	0.046	0.065	0.33	0.353	0.213	0.385	0.236	0.013	0.05	0.353	0.144	0.377	0.48	0.2	0.009	0.021	0.243	0.001	0.003	0.075	0.012	0.001	0
290	410	170	0.056	0.041	0.256	0.108	0.083	0.134	0.083	0.144	0.138	0.073	0.081	0.263	0.389	0.678	0.024	0.142	0.417	0.068	0.083	0.473	0.002	0.036	0.024	0.024	0.053	0.06	0.265	0.303	0.174	0.342	0.205	0.008	0.043	0.345	0.145	0.326	0.465	0.178	0.009	0.016	0.183	0.001	0.002	0.06	0.01	0.003	0
90	410	190	0.367	0.15	0.733	0.235	0.232	0.064	0.032	0.728	0.254	0.253	0.069	0.828	0.489	0.425	0.054	0.326	0.829	0.312	0.127	0.395	0.019	0.013	0.074	0.017	0.114	0.222	0.746	0.646	0.58	0.716	0.52	0.759	0.127	0.546	0.257	0.643	0.67	0.357	0.142	0.038	0.497	0.002	0.012	0.439	0.024	0	0
110	410	190	0.36	0.135	0.791	0.257	0.226	0.073	0.022	0.86	0.314	0.27	0.08	0.841	0.547	0.601	0.069	0.374	0.897	0.288	0.15	0.4	0.019	0.012	0.088	0.018	0.133	0.224	0.814	0.799	0.756	0.761	0.604	0.872	0.139	0.657	0.291	0.757	0.797	0.362	0.126	0.04	0.455	0.002	0.025	0.428	0.037	0	0
130	410	190	0.314	0.077	0.908	0.237	0.219	0.085	0.037	0.855	0.18	0.262	0.093	0.719	0.558	0.846	0.065	0.372	0.949	0.282	0.154	0.378	0.018	0.016	0.11	0.024	0.067	0.16	0.777	0.742	0.596	0.724	0.605	0.76	0.137	0.656	0.287	0.782	0.905	0.378	0.097	0.034	0.468	0.004	0.009	0.287	0.031	0	0
150	410	190	0.294	0.065	0.714	0.219	0.213	0.086	0.08	0.669	0.125	0.281	0.118	0.639	0.529	0.862	0.081	0.346	0.855	0.172	0.149	0.342	0.016	0.019	0.125	0.036	0.056	0.123	0.726	0.725	0.5	0.676	0.565	0.33	0.124	0.577	0.266	0.754	0.906	0.364	0.058	0.031	0.333	0.006	0.025	0.278	0.032	0.003	0
170	410	190	0.22	0.045	0.517	0.19	0.15	0.068	0.091	0.516	0.104	0.265	0.127	0.489	0.438	0.687	0.066	0.315	0.725	0.204	0.136	0.331	0.018	0.008	0.091	0.077	0.022	0.101	0.666	0.686	0.452	0.602	0.537	0.19	0.121	0.539	0.24	0.707	0.82	0.35	0.042	0.027	0.248	0.003	0.019	0.247	0.031	0.005	0
190	410	190	0.155	0.032	0.224	0.191	0.124	0.059	0.385	0.199	0.068	0.224	0.133	0.408	0.405	0.53	0.076	0.306	0.456	0.3	0.124	0.307	0.01	0.012	0.06	0.133	0.037	0.09	0.58	0.685	0.4	0.564	0.529	0.131	0.092	0.507	0.237	0.632	0.561	0.298	0.026	0.025	0.175	0.003	0.008	0.198	0.035	0.017	0.001
210	410	190	0.144	0.041	0.182	0.212	0.181	0.053	0.255	0.125	0.098	0.204	0.18	0.399	0.381	0.49	0.123	0.275	0.42	0.129	0.107	0.256	0.004	0.023	0.055	0.083	0.085	0.087	0.475	0.489	0.328	0.501	0.37	0.076	0.082	0.439	0.208	0.535	0.472	0.266	0.011	0.03	0.118	0.003	0.005	0.217	0.037	0	0
230	410	190	0.121	0.048	0.217	0.151	0.141	0.057	0.202	0.167	0.119	0.142	0.115	0.359	0.403	0.53	0.07	0.244	0.407	0.101	0.093	0.23	0.004	0.01	0.043	0.035	0.076	0.08	0.399	0.403	0.271	0.441	0.291	0.042	0.069	0.382	0.166	0.466	0.449	0.224	0.012	0.025	0.146	0.001	0.003	0.211	0.026	0.006	0
250	410	190	0.093	0.044	0.207	0.118	0.112	0.059	0.171	0.156	0.141	0.098	0.088	0.316	0.401	0.567	0.037	0.201	0.324	0.088	0.085	0.273	0.004	0.011	0.033	0.039	0.048	0.076	0.34	0.355	0.229	0.408	0.249	0.024	0.054	0.353	0.144	0.388	0.446	0.211	0.009	0.022	0.17	0.001	0.006	0.121	0.02	0.017	0.003
270	410	190	0.074	0.037	0.208	0.117	0.08	0.116	0.187	0.129	0.132	0.081	0.073	0.301	0.365	0.806	0.026	0.17	0.429	0.082	0.087	0.458	0.003	0.019	0.026	0.034	0.071	0.06	0.297	0.315	0.202	0.368	0.231	0.012	0.047	0.335	0.134	0.351	0.48	0.195	0.011	0.02	0.184	0.001	0.003	0.072	0.02	0	0
290	410	190	0.054	0.035	0.173	0.099	0.066	0.134	0.095	0.139	0.116	0.064	0.071	0.226	0.296	0.623	0.024	0.137	0.413	0.067	0.074	0.423	0.002	0.019	0.022	0.036	0.075	0.056	0.239	0.268	0.166	0.326	0.197	0.011	0.04	0.319	0.134	0.302	0.429	0.16	0.007	0.014	0.132	0.002	0.039	0.072	0.022	0	0
310	410	190	0.048	0.035	0.119	0.064	0.061	0.055	0.022	0.085	0.063	0.051	0.079	0.132	0.233	0.403	0.028	0.12	0.232	0.097	0.057	0.298	0.002	0.016	0.021	0.022	0.043	0.047	0.176	0.206	0.125	0.243	0.153	0.007	0.038	0.267	0.083	0.216	0.4	0.117	0.005	0.009	0.101	0.002	0.013	0.034	0.041	0.001	0.003
70	410	210	0.382	0.128	0.627	0.186	0.228	0.051	0.046	0.564	0.237	0.193	0.067	0.758	0.43	0.371	0.04	0.266	0.697	0.386	0.105	0.337	0.017	0.022	0.068	0.014	0.077	0.131	0.584	0.581	0.423	0.562	0.462	0.482	0.112	0.456	0.229	0.532	0.605	0.296	0.165	0.023	0.447	0.003	0.007	0.379	0.013	0.001	0
90	410	210	0.418	0.174	0.747	0.276	0.288	0.069	0.03	0.891	0.351	0.237	0.074	0.875	0.483	0.528	0.051	0.385	0.901	0.302	0.145	0.387	0.019	0.018	0.081	0.017	0.134	0.231	0.814	0.793	0.632	0.754	0.65	0.751	0.142	0.626	0.293	0.747	0.828	0.327	0.184	0.045	0.58	0.001	0.029	0.479	0.028	0.001	0
110	410	210	0.365	0.094	0.899	0.242	0.234	0.077	0.034	0.928	0.199	0.222	0.072	0.83	0.538	0.745	0.056	0.375	0.988	0.197	0.149	0.389	0.02	0.011	0.092	0.019	0.07	0.195	0.779	0.822	0.563	0.711	0.603	0.761	0.143	0.636	0.286	0.767	0.881	0.315	0.19	0.038	0.555	0.002	0.016	0.34	0.026	0	0
130	410	210	0.32	0.063	0.747	0.22	0.207	0.083	0.078	0.734	0.114	0.25	0.097	0.689	0.48	0.844	0.08	0.346	0.831	0.203	0.143	0.344	0.021	0.014	0.105	0.032	0.069	0.129	0.701	0.695	0.491	0.665	0.552	0.375	0.121	0.59	0.265	0.744	0.911	0.329	0.105	0.032	0.388	0.002	0.008	0.282	0.034	0.003	0
150	410	210	0.247	0.056	0.514	0.199	0.219	0.064	0.096	0.532	0.135	0.282	0.121	0.553	0.412	0.783	0.078	0.313	0.749	0.237	0.136	0.343	0.016	0.016	0.084	0.042	0.038	0.093	0.653	0.646	0.469	0.598	0.543	0.17	0.107	0.556	0.248	0.727	0.936	0.322	0.081	0.033	0.251	0.002	0.012	0.257	0.038	0.007	0
170	410	210	0.176	0.029	0.311	0.213	0.105	0.071	0.622	0.294	0.068	0.221	0.105	0.437	0.359	0.44	0.057	0.3	0.439	0.247	0.127	0.313	0.01	0.006	0.06	0.093	0.016	0.07	0.6	0.635	0.424	0.572	0.589	0.225	0.101	0.519	0.242	0.676	0.653	0.296	0.041	0.022	0.17	0.001	0.004	0.168	0.042	0.001	0
190	410	210	0.15	0.03	0.099	0.21	0.124	0.061	0.627	0.063	0.07	0.197	0.125	0.385	0.352	0.356	0.064	0.277	0.284	0.164	0.116	0.265	0.003	0.005	0.048	0.088	0.067	0.076	0.52	0.617	0.359	0.517	0.408	0.085	0.077	0.483	0.217	0.594	0.472	0.266	0.003	0.024	0.104	0.002	0.006	0.18	0.042	0.004	0
210	410	210	0.131	0.047	0.095	0.171	0.135	0.059	0.453	0.07	0.078	0.144	0.117	0.362	0.35	0.322	0.064	0.242	0.279	0.113	0.097	0.215	0.002	0.009	0.038	0.058	0.082	0.072	0.416	0.408	0.284	0.441	0.318	0.055	0.071	0.403	0.177	0.484	0.362	0.219	0.006	0.024	0.094	0.002	0.012	0.135	0.033	0.001	0
230	410	210	0.112	0.035	0.106	0.133	0.101	0.054	0.418	0.091	0.072	0.111	0.092	0.323	0.358	0.339	0.046	0.203	0.256	0.088	0.084	0.201	0.002	0.006	0.032	0.049	0.064	0.07	0.345	0.344	0.237	0.391	0.261	0.032	0.059	0.354	0.147	0.402	0.319	0.187	0.006	0.022	0.101	0.001	0.003	0.103	0.023	0.012	0
250	410	210	0.084	0.031	0.105	0.112	0.104	0.079	0.363	0.096	0.082	0.087	0.083	0.297	0.338	0.431	0.029	0.169	0.292	0.076	0.081	0.255	0.002	0.008	0.026	0.062	0.075	0.061	0.295	0.305	0.201	0.366	0.225	0.032	0.047	0.323	0.131	0.345	0.385	0.18	0.006	0.019	0.116	0.001	0.002	0.086	0.018	0.002	0
270	410	210	0.064	0.032	0.144	0.114	0.069	0.131	0.291	0.108	0.093	0.078	0.076	0.289	0.343	0.668	0.026	0.149	0.41	0.067	0.081	0.395	0.002	0.013	0.022	0.053	0.095	0.053	0.261	0.286	0.181	0.349	0.203	0.014	0.042	0.309	0.119	0.32	0.449	0.181	0.008	0.017	0.156	0.001	0.002	0.093	0.015	0	0
290	410	210	0.049	0.032	0.166	0.097	0.066	0.135	0.196	0.121	0.08	0.063	0.075	0.247	0.295	0.639	0.022	0.131	0.45	0.072	0.073	0.391	0.002	0.02	0.022	0.051	0.104	0.05	0.211	0.254	0.155	0.311	0.185	0.01	0.038	0.298	0.129	0.286	0.434	0.16	0.008	0.017	0.126	0.002	0.003	0.104	0.012	0	0
310	410	210	0.043	0.036	0.133	0.076	0.062	0.1	0.104	0.105	0.066	0.055	0.081	0.159	0.252	0.461	0.022	0.107	0.389	0.09	0.062	0.348	0.002	0.025	0.02	0.044	0.07	0.047	0.166	0.205	0.13	0.26	0.151	0.009	0.032	0.268	0.086	0.231	0.358	0.118	0.008	0.009	0.082	0.001	0.002	0.093	0.01	0	0
70	410	230	0.517	0.18	0.814	0.203	0.306	0.064	0.039	0.821	0.357	0.207	0.08	0.925	0.578	0.493	0.042	0.368	0.846	0.384	0.135	0.354	0.022	0.034	0.068	0.016	0.129	0.136	0.738	0.781	0.57	0.663	0.6	0.504	0.136	0.638	0.303	0.664	0.741	0.322	0.276	0.028	0.603	0.002	0.008	0.458	0.019	0.001	0
90	410	230	0.4	0.134	0.835	0.233	0.251	0.065	0.031	0.93	0.246	0.193	0.067	0.837	0.504	0.678	0.038	0.37	0.955	0.234	0.139	0.388	0.023	0.024	0.073	0.014	0.08	0.122	0.745	0.798	0.532	0.649	0.628	0.568	0.125	0.635	0.283	0.709	0.846	0.289	0.256	0.033	0.623	0.001	0.02	0.37	0.021	0	0
110	410	230	0.333	0.082	0.764	0.225	0.228	0.078	0.075	0.785	0.125	0.205	0.071	0.731	0.482	0.76	0.061	0.351	0.844	0.187	0.139	0.37	0.019	0.017	0.079	0.03	0.061	0.149	0.714	0.791	0.487	0.632	0.579	0.369	0.134	0.602	0.261	0.687	0.899	0.284	0.182	0.035	0.526	0.001	0.008	0.294	0.027	0	0
130	410	230	0.268	0.058	0.56	0.207	0.181	0.073	0.076	0.605	0.12	0.239	0.089	0.572	0.439	0.816	0.069	0.327	0.742	0.175	0.136	0.379	0.021	0.013	0.073	0.039	0.045	0.094	0.679	0.656	0.468	0.585	0.509	0.214	0.102	0.567	0.247	0.689	0.944	0.295	0.109	0.026	0.313	0.002	0.02	0.271	0.037	0.012	0
150	410	230	0.2	0.029	0.366	0.195	0.187	0.089	0.411	0.47	0.055	0.213	0.086	0.481	0.35	0.499	0.047	0.283	0.548	0.393	0.121	0.295	0.017	0.004	0.051	0.047	0.051	0.084	0.601	0.609	0.42	0.55	0.488	0.245	0.102	0.534	0.228	0.67	0.667	0.301	0.061	0.027	0.182	0.001	0.015	0.168	0.049	0	0
170	410	230	0.154	0.026	0.086	0.194	0.106	0.08	0.903	0.094	0.052	0.171	0.087	0.395	0.347	0.268	0.036	0.266	0.221	0.113	0.114	0.262	0.005	0.002	0.039	0.075	0.072	0.062	0.522	0.58	0.366	0.486	0.444	0.128	0.071	0.503	0.216	0.598	0.436	0.275	0.004	0.023	0.104	0.001	0.007	0.095	0.055	0.014	0
190	410	230	0.137	0.032	0.061	0.171	0.112	0.068	0.678	0.04	0.061	0.145	0.106	0.351	0.323	0.24	0.055	0.234	0.205	0.106	0.098	0.215	0.002	0.004	0.03	0.073	0.108	0.069	0.408	0.522	0.28	0.433	0.342	0.09	0.063	0.416	0.179	0.499	0.345	0.22	0.003	0.026	0.081	0.002	0.006	0.088	0.047	0.001	0
210	410	230	0.122	0.033	0.048	0.14	0.113	0.056	0.619	0.044	0.054	0.118	0.1	0.333	0.321	0.272	0.049	0.196	0.192	0.114	0.085	0.183	0.002	0.004	0.026	0.068	0.111	0.062	0.337	0.335	0.23	0.379	0.273	0.046	0.061	0.361	0.148	0.421	0.3	0.185	0.004	0.022	0.084	0.001	0.005	0.079	0.032	0	0
230	410	230	0.091	0.025	0.06	0.121	0.092	0.066	0.501	0.061	0.05	0.105	0.098	0.306	0.302	0.284	0.039	0.168	0.227	0.08	0.073	0.165	0.002	0.006	0.024	0.057	0.123	0.055	0.286	0.283	0.192	0.349	0.227	0.028	0.054	0.315	0.127	0.343	0.265	0.156	0.006	0.021	0.095	0.001	0.002	0.079	0.024	0	0
250	410	230	0.071	0.027	0.064	0.121	0.105	0.096	0.368	0.073	0.06	0.083	0.076	0.26	0.28	0.276	0.025	0.149	0.286	0.071	0.065	0.181	0.002	0.005	0.022	0.047	0.148	0.058	0.247	0.264	0.166	0.312	0.196	0.025	0.043	0.287	0.114	0.3	0.278	0.142	0.005	0.016	0.101	0.001	0.002	0.06	0.018	0	0
270	410	230	0.053	0.03	0.068	0.119	0.062	0.107	0.238	0.066	0.061	0.071	0.067	0.213	0.244	0.356	0.023	0.133	0.33	0.068	0.064	0.222	0.004	0.005	0.019	0.05	0.113	0.052	0.222	0.254	0.15	0.292	0.181	0.015	0.039	0.278	0.119	0.282	0.303	0.155	0.003	0.016	0.078	0.001	0.001	0.08	0.014	0	0
290	410	230	0.042	0.04	0.057	0.088	0.05	0.09	0.225	0.053	0.077	0.068	0.068	0.157	0.194	0.291	0.024	0.117	0.37	0.079	0.063	0.211	0.004	0.005	0.019	0.109	0.059	0.043	0.197	0.228	0.134	0.275	0.164	0.012	0.037	0.272	0.118	0.254	0.285	0.131	0.003	0.014	0.04	0.001	0.001	0.155	0.012	0	0
310	410	230	0.035	0.044	0.033	0.06	0.042	0.045	0.166	0.033	0.077	0.049	0.06	0.083	0.126	0.154	0.019	0.096	0.327	0.085	0.053	0.164	0.003	0.003	0.017	0.094	0.035	0.04	0.159	0.184	0.116	0.233	0.136	0.007	0.033	0.256	0.087	0.209	0.225	0.103	0.002	0.008	0.007	0.001	0.001	0.157	0.009	0	0
330	410	230	0.028	0.05	0.02	0.048	0.033	0.039	0.061	0.016	0.041	0.04	0.091	0.041	0.07	0.1	0.008	0.09	0.237	0.112	0.048	0.124	0.002	0.002	0.015	0.016	0.038	0.043	0.118	0.139	0.091	0.18	0.109	0.003	0.026	0.22	0.065	0.16	0.151	0.09	0.001	0.001	0.004	0.001	0.001	0.094	0.007	0	0
70	410	250	0.417	0.097	0.81	0.172	0.347	0.051	0.025	0.793	0.241	0.181	0.06	0.784	0.643	0.621	0.029	0.316	0.778	0.3	0.119	0.306	0.018	0.028	0.043	0.021	0.076	0.093	0.669	0.708	0.513	0.541	0.495	0.173	0.093	0.52	0.262	0.568	0.693	0.231	0.343	0.03	0.631	0.002	0.008	0.367	0.013	0	0
90	410	250	0.357	0.085	0.755	0.211	0.248	0.067	0.058	0.777	0.147	0.195	0.058	0.732	0.484	0.663	0.045	0.341	0.829	0.261	0.135	0.368	0.021	0.018	0.051	0.019	0.055	0.117	0.712	0.775	0.514	0.594	0.545	0.183	0.101	0.583	0.26	0.614	0.806	0.257	0.268	0.029	0.6	0.003	0.005	0.347	0.021	0.014	0
110	410	250	0.287	0.071	0.69	0.219	0.199	0.059	0.074	0.7	0.13	0.204	0.065	0.632	0.416	0.817	0.046	0.329	0.796	0.186	0.144	0.443	0.023	0.024	0.046	0.031	0.036	0.106	0.703	0.767	0.478	0.595	0.58	0.105	0.119	0.59	0.244	0.649	0.942	0.278	0.18	0.03	0.445	0.002	0.034	0.309	0.034	0.009	0
130	410	250	0.217	0.036	0.456	0.197	0.15	0.078	0.149	0.581	0.061	0.179	0.071	0.513	0.417	0.657	0.048	0.296	0.634	0.216	0.129	0.378	0.016	0.004	0.044	0.021	0.043	0.112	0.603	0.629	0.433	0.544	0.471	0.211	0.101	0.537	0.231	0.655	0.785	0.268	0.115	0.028	0.266	0.002	0.015	0.207	0.041	0	0
150	410	250	0.182	0.03	0.126	0.183	0.165	0.084	0.947	0.238	0.044	0.141	0.07	0.413	0.332	0.393	0.03	0.248	0.265	0.333	0.114	0.26	0.008	0.001	0.032	0.044	0.225	0.064	0.532	0.587	0.381	0.49	0.44	0.218	0.078	0.509	0.212	0.598	0.443	0.251	0.024	0.027	0.127	0.001	0.017	0.067	0.066	0.015	0
170	410	250	0.149	0.023	0.042	0.167	0.114	0.096	0.766	0.041	0.048	0.135	0.081	0.362	0.324	0.261	0.039	0.227	0.185	0.109	0.103	0.224	0.006	0.002	0.025	0.057	0.248	0.092	0.454	0.523	0.308	0.428	0.331	0.156	0.063	0.448	0.18	0.514	0.342	0.231	0.003	0.029	0.094	0.001	0.055	0.061	0.061	0.138	0
190	410	250	0.121	0.027	0.04	0.139	0.117	0.067	0.606	0.036	0.06	0.131	0.095	0.342	0.315	0.175	0.053	0.185	0.19	0.082	0.087	0.18	0.002	0.004	0.022	0.05	0.222	0.067	0.352	0.456	0.224	0.372	0.275	0.077	0.052	0.35	0.148	0.403	0.272	0.186	0.004	0.024	0.094	0.002	0.005	0.043	0.05	0.023	0
210	410	250	0.101	0.031	0.042	0.131	0.107	0.062	0.518	0.039	0.053	0.111	0.097	0.312	0.297	0.22	0.057	0.17	0.19	0.079	0.073	0.164	0.002	0.004	0.021	0.045	0.203	0.056	0.295	0.286	0.187	0.335	0.236	0.045	0.048	0.311	0.128	0.344	0.261	0.159	0.003	0.02	0.083	0.001	0.002	0.065	0.037	0.004	0
230	410	250	0.081	0.031	0.054	0.118	0.094	0.079	0.452	0.052	0.045	0.094	0.083	0.27	0.267	0.282	0.041	0.155	0.206	0.071	0.065	0.146	0.002	0.005	0.019	0.038	0.196	0.051	0.254	0.26	0.162	0.303	0.202	0.028	0.044	0.282	0.11	0.292	0.211	0.135	0.004	0.016	0.086	0.001	0.001	0.076	0.025	0.001	0
250	410	250	0.064	0.034	0.049	0.121	0.097	0.078	0.32	0.057	0.05	0.074	0.063	0.205	0.217	0.205	0.028	0.14	0.234	0.082	0.059	0.147	0.003	0.005	0.019	0.032	0.14	0.053	0.22	0.251	0.142	0.273	0.175	0.018	0.04	0.26	0.098	0.268	0.19	0.125	0.002	0.016	0.045	0.001	0.002	0.075	0.021	0.042	0
270	410	250	0.05	0.042	0.027	0.109	0.052	0.071	0.226	0.035	0.059	0.061	0.055	0.147	0.154	0.159	0.019	0.136	0.244	0.098	0.055	0.155	0.005	0.005	0.015	0.035	0.112	0.048	0.192	0.219	0.126	0.254	0.154	0.014	0.039	0.252	0.099	0.245	0.176	0.121	0.002	0.014	0.015	0.001	0.001	0.12	0.019	0	0
290	410	250	0.039	0.06	0.022	0.07	0.042	0.049	0.246	0.022	0.07	0.057	0.053	0.113	0.127	0.134	0.019	0.119	0.269	0.109	0.052	0.129	0.007	0.003	0.016	0.073	0.05	0.045	0.169	0.205	0.114	0.232	0.142	0.013	0.036	0.248	0.106	0.22	0.164	0.102	0.002	0.012	0.007	0.001	0.001	0.15	0.018	0	0
310	410	250	0.032	0.057	0.014	0.044	0.035	0.026	0.111	0.013	0.045	0.041	0.044	0.067	0.092	0.096	0.014	0.093	0.231	0.107	0.041	0.118	0.003	0.002	0.014	0.066	0.032	0.03	0.128	0.16	0.094	0.189	0.114	0.007	0.025	0.221	0.066	0.163	0.128	0.08	0.002	0.007	0.003	0.001	0	0.117	0.009	0	0
330	410	250	0.027	0.038	0.012	0.043	0.03	0.032	0.034	0.008	0.022	0.039	0.056	0.037	0.068	0.094	0.008	0.126	0.175	0.142	0.039	0.124	0.002	0.002	0.012	0.005	0.045	0.031	0.101	0.124	0.071	0.161	0.089	0.002	0.022	0.192	0.052	0.133	0.111	0.069	0.002	0.001	0.003	0.001	0	0.089	0.009	0	0
50	410	270	0.226	0.036	0.362	0.072	0.206	0.02	0.008	0.214	0.168	0.07	0.035	0.317	0.269	0.35	0.018	0.132	0.212	0.244	0.06	0.171	0.01	0.009	0.032	0.022	0.012	0.036	0.336	0.392	0.234	0.344	0.257	0.014	0.083	0.256	0.137	0.27	0.29	0.118	0.101	0.064	0.297	0.01	0.024	0.085	0.012	0.003	0.007
70	410	270	0.3	0.052	0.757	0.147	0.32	0.04	0.033	0.671	0.139	0.168	0.066	0.695	0.618	0.824	0.026	0.293	0.685	0.196	0.119	0.321	0.023	0.013	0.031	0.014	0.018	0.11	0.74	0.778	0.497	0.559	0.489	0.031	0.087	0.55	0.303	0.563	0.857	0.236	0.346	0.051	0.564	0.002	0.034	0.333	0.033	0.001	0.002
90	410	270	0.295	0.047	0.655	0.174	0.278	0.055	0.009	0.799	0.071	0.184	0.061	0.707	0.489	0.867	0.032	0.309	0.818	0.166	0.13	0.414	0.031	0.01	0.04	0.008	0.018	0.068	0.725	0.771	0.506	0.562	0.537	0.057	0.109	0.601	0.252	0.592	0.936	0.258	0.303	0.021	0.49	0.002	0.027	0.394	0.016	0.001	0
110	410	270	0.249	0.033	0.639	0.174	0.146	0.07	0.03	0.757	0.041	0.187	0.059	0.625	0.388	0.836	0.043	0.281	0.776	0.137	0.119	0.467	0.03	0.02	0.032	0.01	0.013	0.097	0.635	0.704	0.446	0.525	0.495	0.115	0.107	0.563	0.219	0.584	0.875	0.247	0.227	0.025	0.439	0.001	0.005	0.338	0.026	0.015	0
130	410	270	0.198	0.027	0.384	0.184	0.132	0.078	0.504	0.563	0.041	0.149	0.053	0.545	0.354	0.343	0.036	0.267	0.479	0.362	0.111	0.327	0.015	0.005	0.033	0.029	0.111	0.159	0.568	0.589	0.416	0.509	0.463	0.355	0.089	0.536	0.214	0.558	0.531	0.229	0.095	0.026	0.226	0.001	0.006	0.128	0.048	0.002	0
150	410	270	0.165	0.024	0.051	0.196	0.114	0.097	0.875	0.115	0.04	0.136	0.06	0.38	0.283	0.304	0.028	0.234	0.188	0.124	0.1	0.237	0.01	0.001	0.027	0.019	0.399	0.058	0.522	0.553	0.348	0.474	0.393	0.153	0.068	0.493	0.189	0.519	0.386	0.215	0.003	0.027	0.119	0.001	0.016	0.055	0.08	0.155	0
170	410	270	0.135	0.02	0.033	0.137	0.1	0.095	0.617	0.036	0.055	0.115	0.071	0.313	0.3	0.156	0.036	0.202	0.17	0.109	0.091	0.204	0.005	0.003	0.024	0.029	0.316	0.058	0.437	0.488	0.293	0.433	0.34	0.135	0.061	0.431	0.166	0.448	0.325	0.211	0.003	0.045	0.097	0.001	0.032	0.053	0.094	0.185	0
190	410	270	0.112	0.025	0.028	0.12	0.099	0.068	0.467	0.029	0.048	0.113	0.081	0.286	0.287	0.143	0.045	0.171	0.155	0.083	0.074	0.168	0.002	0.007	0.018	0.036	0.23	0.053	0.322	0.412	0.207	0.332	0.28	0.088	0.05	0.331	0.132	0.348	0.255	0.165	0.004	0.022	0.075	0.001	0.005	0.045	0.07	0.011	0
210	410	270	0.091	0.038	0.026	0.112	0.095	0.068	0.367	0.032	0.063	0.098	0.082	0.265	0.269	0.174	0.045	0.151	0.166	0.076	0.066	0.169	0.002	0.006	0.019	0.038	0.211	0.048	0.269	0.257	0.164	0.286	0.23	0.048	0.041	0.285	0.114	0.301	0.242	0.166	0.003	0.016	0.059	0.001	0.004	0.042	0.042	0.001	0
230	410	270	0.071	0.044	0.03	0.103	0.084	0.061	0.372	0.031	0.047	0.081	0.074	0.215	0.224	0.218	0.039	0.133	0.172	0.082	0.059	0.143	0.002	0.004	0.016	0.035	0.142	0.051	0.23	0.24	0.142	0.265	0.2	0.034	0.036	0.261	0.1	0.263	0.196	0.136	0.002	0.014	0.043	0.001	0.001	0.056	0.032	0.001	0
250	410	270	0.057	0.041	0.032	0.091	0.095	0.053	0.31	0.029	0.033	0.067	0.059	0.155	0.166	0.202	0.033	0.127	0.177	0.109	0.053	0.129	0.003	0.002	0.015	0.027	0.096	0.046	0.193	0.217	0.12	0.25	0.164	0.022	0.033	0.239	0.09	0.238	0.168	0.107	0.001	0.014	0.02	0.001	0.012	0.072	0.026	0	0
270	410	270	0.045	0.046	0.02	0.073	0.057	0.053	0.237	0.024	0.032	0.056	0.051	0.111	0.135	0.153	0.022	0.128	0.192	0.133	0.049	0.134	0.003	0.003	0.015	0.021	0.062	0.039	0.167	0.199	0.106	0.23	0.14	0.016	0.031	0.23	0.091	0.223	0.149	0.1	0.001	0.012	0.007	0.001	0.009	0.085	0.02	0	0
290	410	270	0.036	0.063	0.016	0.048	0.043	0.026	0.243	0.011	0.026	0.046	0.043	0.071	0.115	0.119	0.017	0.105	0.144	0.14	0.042	0.097	0.002	0.002	0.012	0.021	0.038	0.029	0.137	0.167	0.092	0.198	0.115	0.009	0.026	0.216	0.094	0.188	0.127	0.085	0	0.01	0.003	0.001	0.001	0.061	0.014	0	0
310	410	270	0.029	0.044	0.011	0.035	0.031	0.017	0.08	0.006	0.012	0.039	0.043	0.038	0.088	0.092	0.014	0.126	0.136	0.162	0.034	0.086	0.002	0.001	0.012	0.013	0.03	0.023	0.103	0.127	0.072	0.159	0.09	0.003	0.019	0.184	0.051	0.134	0.099	0.065	0	0.005	0.001	0.001	0	0.071	0.01	0	0
330	410	270	0.023	0.031	0.009	0.032	0.027	0.015	0.02	0.004	0.007	0.038	0.047	0.023	0.064	0.09	0.009	0.145	0.139	0.282	0.031	0.076	0.001	0.001	0.011	0.002	0.037	0.025	0.089	0.107	0.061	0.139	0.078	0.001	0.017	0.171	0.045	0.115	0.092	0.06	0	0.001	0.001	0.001	0	0.091	0.012	0	0
350	410	270	0.02	0.027	0.008	0.034	0.032	0.015	0.014	0.005	0.009	0.019	0.01	0.016	0.003	0.034	0	0.148	0.102	0.248	0.028	0.073	0.001	0.002	0.003	0.002	0.034	0.025	0.087	0.108	0.059	0.134	0.077	0.001	0.018	0.169	0.046	0.115	0.09	0.061	0	0	0.002	0	0.008	0.07	0.005	0	0
50	410	290	0.131	0.031	0.314	0.067	0.106	0.019	0.004	0.125	0.135	0.036	0.02	0.245	0.206	0.138	0.015	0.101	0.156	0.139	0.063	0.113	0.003	0.002	0.023	0.006	0.011	0.019	0.287	0.349	0.189	0.286	0.222	0.012	0.054	0.242	0.114	0.237	0.221	0.089	0.077	0.021	0.266	0.003	0.021	0.028	0.015	0.001	0.005
70	410	290	0.23	0.038	0.702	0.099	0.338	0.03	0.006	0.479	0.079	0.095	0.06	0.505	0.418	0.464	0.033	0.196	0.461	0.133	0.094	0.281	0.019	0.005	0.028	0.009	0.007	0.057	0.532	0.598	0.345	0.449	0.427	0.064	0.077	0.422	0.204	0.475	0.504	0.179	0.279	0.034	0.531	0.003	0.01	0.221	0.02	0.005	0.011
90	410	290	0.255	0.033	0.65	0.152	0.234	0.058	0.018	0.767	0.033	0.13	0.057	0.662	0.471	0.489	0.035	0.244	0.745	0.169	0.107	0.347	0.029	0.006	0.038	0.007	0.009	0.101	0.603	0.627	0.388	0.502	0.49	0.358	0.092	0.558	0.225	0.534	0.59	0.205	0.333	0.031	0.49	0.002	0.002	0.257	0.016	0	0
110	410	290	0.233	0.026	0.612	0.145	0.148	0.071	0.023	0.745	0.031	0.143	0.053	0.628	0.344	0.385	0.037	0.245	0.74	0.161	0.103	0.344	0.021	0.016	0.034	0.011	0.014	0.101	0.57	0.617	0.38	0.478	0.469	0.635	0.103	0.55	0.212	0.53	0.557	0.213	0.219	0.021	0.421	0.001	0.003	0.194	0.022	0.001	0
130	410	290	0.191	0.022	0.328	0.165	0.138	0.056	0.517	0.566	0.039	0.117	0.046	0.525	0.327	0.139	0.028	0.246	0.402	0.261	0.099	0.249	0.007	0.012	0.025	0.032	0.158	0.162	0.506	0.514	0.371	0.457	0.517	0.569	0.075	0.522	0.191	0.559	0.429	0.214	0.097	0.022	0.239	0.001	0.004	0.033	0.052	0.025	0
150	410	290	0.151	0.022	0.046	0.139	0.153	0.073	0.623	0.091	0.049	0.119	0.056	0.34	0.317	0.162	0.025	0.211	0.179	0.13	0.087	0.211	0.008	0.001	0.019	0.028	0.346	0.053	0.448	0.475	0.32	0.432	0.394	0.2	0.068	0.455	0.169	0.472	0.372	0.206	0.001	0.025	0.131	0.001	0.008	0.03	0.124	0.054	0.001
170	410	290	0.122	0.02	0.033	0.124	0.098	0.044	0.375	0.029	0.034	0.1	0.058	0.241	0.33	0.106	0.027	0.204	0.139	0.121	0.08	0.194	0.003	0.001	0.019	0.041	0.18	0.059	0.393	0.449	0.275	0.41	0.37	0.141	0.055	0.405	0.156	0.438	0.352	0.208	0.001	0.027	0.07	0.002	0.009	0.03	0.117	0.017	0
190	410	290	0.106	0.022	0.024	0.106	0.089	0.051	0.31	0.023	0.026	0.093	0.07	0.194	0.288	0.112	0.037	0.167	0.13	0.095	0.071	0.164	0.002	0.002	0.017	0.059	0.117	0.059	0.327	0.405	0.218	0.339	0.303	0.069	0.047	0.347	0.133	0.361	0.32	0.18	0.002	0.023	0.045	0.004	0.008	0.019	0.068	0.011	0
210	410	290	0.084	0.024	0.021	0.092	0.084	0.05	0.279	0.026	0.024	0.082	0.07	0.168	0.226	0.12	0.036	0.136	0.124	0.14	0.061	0.138	0.002	0.005	0.014	0.041	0.089	0.05	0.261	0.248	0.168	0.279	0.239	0.051	0.039	0.287	0.108	0.297	0.241	0.15	0.001	0.02	0.025	0.002	0.005	0.013	0.061	0.007	0
230	410	290	0.064	0.027	0.021	0.075	0.079	0.039	0.256	0.023	0.027	0.068	0.061	0.132	0.169	0.132	0.028	0.116	0.134	0.102	0.051	0.126	0.002	0.003	0.013	0.02	0.06	0.043	0.214	0.214	0.129	0.239	0.189	0.038	0.031	0.246	0.093	0.247	0.175	0.115	0.001	0.013	0.011	0.001	0.002	0.026	0.035	0.002	0
250	410	290	0.048	0.033	0.025	0.066	0.083	0.04	0.236	0.019	0.023	0.054	0.048	0.093	0.127	0.131	0.021	0.104	0.16	0.117	0.047	0.107	0.002	0.002	0.01	0.016	0.041	0.035	0.175	0.19	0.104	0.215	0.153	0.023	0.027	0.219	0.083	0.213	0.14	0.097	0	0.011	0.008	0.001	0.001	0.033	0.023	0	0
270	410	290	0.039	0.031	0.016	0.067	0.054	0.063	0.158	0.019	0.021	0.047	0.045	0.066	0.117	0.14	0.017	0.102	0.18	0.122	0.043	0.103	0.002	0.001	0.01	0.016	0.045	0.039	0.146	0.185	0.086	0.199	0.128	0.012	0.025	0.206	0.093	0.193	0.127	0.091	0	0.011	0.004	0.001	0.002	0.053	0.021	0	0
290	410	290	0.035	0.045	0.014	0.051	0.043	0.031	0.148	0.008	0.022	0.042	0.039	0.052	0.103	0.103	0.014	0.099	0.14	0.133	0.04	0.084	0.002	0.001	0.011	0.009	0.032	0.036	0.131	0.153	0.079	0.178	0.111	0.007	0.022	0.203	0.106	0.174	0.113	0.086	0	0.009	0.001	0	0.001	0.023	0.013	0.001	0
310	410	290	0.027	0.043	0.011	0.035	0.03	0.016	0.07	0.004	0.007	0.038	0.041	0.026	0.084	0.083	0.011	0.099	0.106	0.206	0.032	0.063	0.001	0.001	0.011	0.004	0.029	0.022	0.101	0.114	0.066	0.15	0.084	0.003	0.017	0.177	0.059	0.125	0.09	0.068	0.001	0.004	0.001	0.001	0	0.049	0.023	0	0
330	410	290	0.022	0.027	0.008	0.03	0.028	0.014	0.028	0.003	0.005	0.037	0.045	0.016	0.055	0.084	0.007	0.132	0.092	0.269	0.029	0.06	0.001	0.001	0.011	0.001	0.03	0.022	0.085	0.097	0.056	0.135	0.074	0.002	0.015	0.161	0.043	0.102	0.082	0.06	0	0	0.002	0.002	0	0.076	0.028	0	0
350	410	290	0.02	0.026	0.008	0.033	0.032	0.013	0.013	0.004	0.007	0.018	0.008	0.012	0.001	0.033	0	0.156	0.063	0.185	0.024	0.064	0.001	0.001	0.003	0.001	0.03	0.021	0.086	0.105	0.055	0.131	0.078	0	0.016	0.166	0.045	0.118	0.083	0.062	0	0	0.004	0	0.009	0.055	0.006	0	0
270	430	110	0.046	0.047	0.248	0.067	0.05	0.027	0.002	0.062	0.17	0.073	0.056	0.164	0.319	0.235	0.026	0.133	0.135	0.075	0.071	0.164	0.001	0.002	0.045	0.023	0.014	0.133	0.227	0.216	0.15	0.315	0.203	0.012	0.048	0.29	0.096	0.255	0.263	0.186	0.003	0.009	0.108	0.001	0.005	0.013	0.007	0	0
290	430	110	0.046	0.028	0.05	0.074	0.056	0.021	0.002	0.032	0.041	0.087	0.057	0.046	0.178	0.167	0.028	0.102	0.146	0.081	0.06	0.223	0.001	0.001	0.044	0.017	0.021	0.106	0.168	0.172	0.121	0.229	0.19	0.015	0.062	0.245	0.101	0.195	0.188	0.342	0.001	0.008	0.028	0.001	0.001	0.002	0.017	0	0
150	430	130	0.164	0.128	0.76	0.138	0.102	0.053	0.015	0.335	0.317	0.226	0.131	0.684	0.782	0.526	0.085	0.252	0.726	0.295	0.108	0.273	0.018	0.02	0.069	0.017	0.093	0.135	0.535	0.514	0.519	0.519	0.396	0.409	0.108	0.472	0.196	0.487	0.57	0.275	0.024	0.016	0.477	0.002	0.004	0.368	0.007	0	0
170	430	130	0.174	0.089	0.804	0.165	0.118	0.06	0.03	0.335	0.322	0.208	0.132	0.637	0.862	0.676	0.069	0.295	0.804	0.229	0.125	0.273	0.02	0.024	0.075	0.025	0.043	0.111	0.609	0.595	0.434	0.597	0.419	0.232	0.127	0.541	0.224	0.609	0.74	0.3	0.03	0.028	0.576	0.001	0.003	0.294	0.012	0.008	0
190	430	130	0.127	0.059	0.687	0.19	0.119	0.055	0.022	0.388	0.234	0.213	0.138	0.529	0.857	0.818	0.056	0.3	0.676	0.184	0.128	0.277	0.021	0.035	0.046	0.018	0.014	0.089	0.621	0.639	0.406	0.586	0.437	0.14	0.122	0.539	0.226	0.648	0.827	0.31	0.032	0.031	0.452	0.001	0.003	0.266	0.012	0.018	0
210	430	130	0.089	0.048	0.597	0.165	0.075	0.056	0.012	0.364	0.217	0.163	0.123	0.507	0.68	0.864	0.054	0.291	0.688	0.22	0.121	0.273	0.014	0.063	0.05	0.03	0.012	0.084	0.594	0.578	0.39	0.611	0.44	0.175	0.102	0.54	0.221	0.641	0.631	0.287	0.027	0.02	0.363	0.001	0.003	0.212	0.012	0.001	0
230	430	130	0.083	0.044	0.418	0.171	0.086	0.048	0.018	0.233	0.213	0.159	0.127	0.434	0.603	0.813	0.082	0.25	0.51	0.131	0.112	0.233	0.004	0.069	0.057	0.053	0.024	0.079	0.522	0.454	0.341	0.583	0.393	0.044	0.08	0.474	0.207	0.549	0.561	0.282	0.02	0.019	0.314	0.002	0.003	0.166	0.018	0	0
250	430	130	0.079	0.045	0.373	0.161	0.122	0.044	0.014	0.153	0.211	0.116	0.111	0.366	0.629	0.621	0.073	0.193	0.271	0.106	0.095	0.195	0.002	0.032	0.048	0.042	0.018	0.076	0.405	0.379	0.254	0.473	0.311	0.018	0.066	0.397	0.165	0.422	0.47	0.262	0.011	0.021	0.295	0.001	0.002	0.115	0.018	0	0
270	430	130	0.065	0.047	0.303	0.102	0.091	0.036	0.017	0.094	0.228	0.078	0.082	0.234	0.463	0.403	0.033	0.169	0.172	0.08	0.079	0.166	0.001	0.01	0.043	0.029	0.016	0.088	0.291	0.308	0.187	0.365	0.233	0.01	0.049	0.326	0.127	0.319	0.359	0.201	0.008	0.019	0.194	0.001	0.015	0.058	0.01	0	0
290	430	130	0.057	0.037	0.083	0.091	0.079	0.026	0.006	0.067	0.093	0.081	0.065	0.072	0.259	0.192	0.028	0.127	0.182	0.089	0.074	0.166	0.002	0.001	0.036	0.02	0.026	0.123	0.198	0.197	0.136	0.27	0.185	0.008	0.054	0.291	0.114	0.222	0.22	0.203	0.002	0.016	0.029	0.002	0.003	0.008	0.02	0	0
310	430	130	0.043	0.02	0.023	0.06	0.052	0.019	0.003	0.056	0.018	0.073	0.058	0.034	0.147	0.144	0.024	0.092	0.16	0.099	0.043	0.145	0.002	0.001	0.03	0.01	0.024	0.104	0.134	0.146	0.098	0.182	0.136	0.006	0.059	0.216	0.069	0.155	0.156	0.146	0	0.007	0.007	0.001	0.001	0.001	0.011	0	0
130	430	150	0.29	0.154	0.823	0.2	0.178	0.081	0.021	0.641	0.497	0.293	0.104	0.851	0.663	0.6	0.078	0.367	0.869	0.402	0.142	0.388	0.019	0.048	0.079	0.017	0.152	0.17	0.794	0.729	1	0.714	0.638	0.804	0.129	0.641	0.29	0.69	0.713	0.374	0.033	0.037	0.549	0.002	0.026	0.472	0.021	0	0
150	430	150	0.242	0.1	0.899	0.19	0.166	0.073	0.024	0.627	0.345	0.262	0.115	0.739	0.687	0.795	0.067	0.375	0.96	0.484	0.148	0.346	0.02	0.041	0.089	0.018	0.074	0.136	0.756	0.709	0.604	0.691	0.56	0.631	0.139	0.617	0.278	0.717	0.803	0.356	0.038	0.046	0.563	0.002	0.017	0.359	0.02	0	0
170	430	150	0.2	0.077	0.812	0.197	0.152	0.078	0.048	0.523	0.299	0.262	0.135	0.618	0.653	0.832	0.068	0.354	0.885	0.445	0.139	0.312	0.02	0.026	0.088	0.037	0.045	0.116	0.713	0.706	0.501	0.663	0.521	0.246	0.134	0.564	0.257	0.717	0.859	0.346	0.029	0.035	0.46	0.002	0.014	0.307	0.02	0.003	0
190	430	150	0.154	0.049	0.713	0.181	0.128	0.075	0.043	0.522	0.191	0.221	0.132	0.515	0.555	0.968	0.065	0.346	0.794	0.512	0.134	0.315	0.016	0.029	0.057	0.048	0.016	0.109	0.659	0.744	0.477	0.617	0.516	0.138	0.117	0.549	0.236	0.706	0.829	0.312	0.039	0.028	0.351	0.001	0.006	0.267	0.017	0.002	0
210	430	150	0.128	0.03	0.479	0.197	0.106	0.056	0.032	0.356	0.142	0.213	0.143	0.497	0.475	0.942	0.088	0.325	0.698	0.16	0.126	0.267	0.008	0.102	0.063	0.09	0.031	0.093	0.599	0.686	0.413	0.596	0.478	0.081	0.092	0.535	0.244	0.631	0.657	0.298	0.036	0.027	0.249	0.003	0.008	0.218	0.026	0	0
230	430	150	0.129	0.034	0.354	0.218	0.163	0.051	0.039	0.227	0.17	0.198	0.163	0.434	0.511	0.767	0.142	0.271	0.491	0.137	0.105	0.241	0.002	0.068	0.06	0.089	0.048	0.096	0.49	0.46	0.326	0.559	0.391	0.037	0.077	0.439	0.215	0.548	0.488	0.278	0.016	0.027	0.223	0.003	0.006	0.207	0.023	0	0
250	430	150	0.105	0.042	0.328	0.149	0.15	0.046	0.033	0.185	0.189	0.128	0.114	0.352	0.533	0.684	0.066	0.211	0.368	0.109	0.089	0.229	0.002	0.02	0.053	0.035	0.029	0.087	0.392	0.369	0.257	0.469	0.305	0.021	0.064	0.377	0.167	0.444	0.465	0.242	0.008	0.026	0.244	0.002	0.003	0.186	0.016	0	0
270	430	150	0.08	0.049	0.282	0.103	0.105	0.039	0.025	0.118	0.226	0.086	0.092	0.276	0.493	0.497	0.036	0.156	0.26	0.084	0.078	0.184	0.003	0.008	0.044	0.032	0.019	0.08	0.304	0.297	0.203	0.389	0.225	0.014	0.05	0.33	0.13	0.337	0.381	0.19	0.004	0.023	0.239	0.002	0.003	0.124	0.012	0	0
290	430	150	0.06	0.045	0.132	0.07	0.093	0.029	0.013	0.052	0.128	0.062	0.058	0.109	0.269	0.261	0.024	0.134	0.167	0.086	0.078	0.141	0.002	0.004	0.035	0.037	0.028	0.076	0.207	0.217	0.145	0.303	0.17	0.009	0.045	0.283	0.121	0.245	0.223	0.136	0.005	0.021	0.072	0.002	0.006	0.029	0.013	0	0
110	430	170	0.355	0.155	0.908	0.237	0.221	0.077	0.022	0.732	0.547	0.279	0.078	0.916	0.61	0.579	0.069	0.386	0.859	0.479	0.145	0.378	0.019	0.025	0.087	0.02	0.15	0.256	0.834	0.772	0.949	0.806	0.673	0.905	0.133	0.674	0.285	0.68	0.754	0.375	0.073	0.039	0.595	0.002	0.024	0.491	0.034	0	0
130	430	170	0.296	0.098	1	0.218	0.203	0.079	0.034	0.791	0.373	0.267	0.093	0.81	0.675	0.828	0.061	0.392	0.971	0.322	0.152	0.383	0.019	0.032	0.105	0.024	0.08	0.17	0.817	0.775	0.705	0.786	0.62	0.843	0.139	0.664	0.29	0.741	0.824	0.354	0.053	0.033	0.62	0.004	0.016	0.379	0.025	0.032	0
150	430	170	0.264	0.07	0.886	0.213	0.183	0.094	0.045	0.669	0.245	0.272	0.108	0.675	0.623	0.899	0.063	0.375	0.929	0.264	0.148	0.355	0.018	0.025	0.113	0.027	0.054	0.122	0.752	0.735	0.518	0.706	0.562	0.448	0.131	0.61	0.271	0.745	0.879	0.348	0.041	0.033	0.524	0.002	0.009	0.313	0.021	0	0
170	430	170	0.213	0.049	0.702	0.208	0.171	0.07	0.068	0.598	0.187	0.26	0.124	0.549	0.566	0.81	0.065	0.35	0.829	0.19	0.138	0.346	0.021	0.017	0.082	0.028	0.03	0.111	0.678	0.741	0.484	0.638	0.56	0.174	0.114	0.565	0.25	0.721	0.872	0.331	0.042	0.029	0.386	0.002	0.005	0.301	0.021	0.002	0
190	430	170	0.147	0.03	0.507	0.199	0.106	0.064	0.06	0.417	0.102	0.213	0.116	0.453	0.421	0.803	0.068	0.337	0.73	0.225	0.127	0.3	0.014	0.028	0.059	0.073	0.018	0.13	0.597	0.715	0.44	0.613	0.522	0.132	0.107	0.562	0.247	0.663	0.683	0.302	0.039	0.025	0.238	0.002	0.014	0.228	0.024	0.003	0
210	430	170	0.143	0.031	0.299	0.224	0.15	0.048	0.076	0.21	0.116	0.247	0.179	0.46	0.383	0.733	0.143	0.306	0.576	0.137	0.115	0.251	0.004	0.093	0.061	0.133	0.059	0.1	0.536	0.598	0.36	0.56	0.42	0.074	0.083	0.464	0.261	0.579	0.492	0.264	0.013	0.027	0.155	0.005	0.004	0.226	0.034	0.001	0
230	430	170	0.134	0.032	0.263	0.199	0.195	0.049	0.07	0.176	0.123	0.186	0.156	0.396	0.422	0.616	0.154	0.261	0.462	0.121	0.099	0.236	0.002	0.046	0.057	0.075	0.056	0.098	0.452	0.431	0.3	0.488	0.347	0.041	0.072	0.399	0.195	0.502	0.421	0.241	0.011	0.026	0.158	0.004	0.004	0.228	0.029	0	0
250	430	170	0.103	0.04	0.316	0.125	0.139	0.046	0.048	0.188	0.194	0.124	0.107	0.35	0.502	0.661	0.059	0.202	0.382	0.091	0.085	0.215	0.006	0.013	0.044	0.028	0.029	0.09	0.369	0.348	0.243	0.418	0.271	0.021	0.059	0.353	0.151	0.409	0.458	0.216	0.009	0.023	0.221	0.002	0.003	0.218	0.017	0	0
270	430	170	0.078	0.04	0.277	0.094	0.094	0.046	0.033	0.164	0.227	0.089	0.089	0.282	0.461	0.543	0.034	0.15	0.297	0.074	0.074	0.216	0.005	0.008	0.038	0.024	0.019	0.083	0.285	0.278	0.19	0.34	0.212	0.011	0.046	0.316	0.121	0.327	0.396	0.176	0.005	0.021	0.222	0.002	0.003	0.118	0.012	0	0
290	430	170	0.057	0.043	0.193	0.079	0.084	0.038	0.026	0.083	0.162	0.068	0.069	0.176	0.348	0.458	0.024	0.142	0.251	0.079	0.068	0.297	0.002	0.017	0.033	0.033	0.031	0.068	0.228	0.239	0.154	0.293	0.182	0.008	0.039	0.299	0.13	0.272	0.368	0.154	0.008	0.021	0.157	0.003	0.017	0.045	0.018	0.001	0
90	430	190	0.422	0.181	0.838	0.286	0.326	0.077	0.029	0.706	0.541	0.25	0.07	0.898	0.589	0.51	0.053	0.351	0.836	0.397	0.141	0.372	0.02	0.02	0.077	0.012	0.13	0.237	0.839	0.721	0.737	0.752	0.592	0.852	0.127	0.583	0.28	0.686	0.72	0.357	0.105	0.044	0.609	0.002	0.011	0.502	0.027	0.001	0
110	430	190	0.369	0.126	0.987	0.266	0.251	0.076	0.057	0.838	0.405	0.238	0.074	0.851	0.595	0.715	0.06	0.368	0.941	0.305	0.149	0.379	0.017	0.021	0.091	0.018	0.083	0.179	0.822	0.817	0.678	0.741	0.615	0.943	0.129	0.659	0.281	0.725	0.817	0.347	0.086	0.036	0.596	0.001	0.018	0.393	0.027	0	0
130	430	190	0.324	0.068	0.988	0.219	0.226	0.087	0.039	0.763	0.215	0.245	0.087	0.723	0.589	0.972	0.061	0.361	0.975	0.305	0.147	0.351	0.02	0.034	0.106	0.03	0.048	0.187	0.765	0.756	0.518	0.705	0.598	0.601	0.124	0.631	0.27	0.72	0.933	0.338	0.072	0.03	0.579	0.003	0.022	0.288	0.026	0	0
150	430	190	0.291	0.061	0.74	0.216	0.208	0.077	0.075	0.593	0.184	0.269	0.116	0.579	0.558	0.873	0.078	0.346	0.815	0.235	0.137	0.334	0.022	0.026	0.103	0.041	0.05	0.126	0.726	0.696	0.466	0.63	0.523	0.216	0.112	0.557	0.249	0.716	0.905	0.336	0.035	0.028	0.391	0.012	0.011	0.29	0.03	0.01	0
170	430	190	0.19	0.03	0.626	0.192	0.153	0.07	0.091	0.55	0.089	0.239	0.113	0.471	0.46	0.766	0.058	0.318	0.719	0.172	0.125	0.309	0.017	0.004	0.059	0.043	0.014	0.124	0.624	0.671	0.43	0.571	0.498	0.205	0.107	0.529	0.23	0.683	0.807	0.311	0.025	0.039	0.251	0.004	0.007	0.236	0.026	0.001	0.001
190	430	190	0.139	0.025	0.235	0.173	0.106	0.086	0.284	0.161	0.069	0.176	0.1	0.379	0.374	0.6	0.044	0.301	0.366	0.175	0.114	0.271	0.007	0.006	0.052	0.055	0.024	0.082	0.546	0.63	0.386	0.529	0.436	0.136	0.081	0.482	0.221	0.584	0.496	0.271	0.009	0.024	0.133	0.002	0.004	0.199	0.033	0.014	0
210	430	190	0.124	0.03	0.166	0.194	0.141	0.05	0.225	0.096	0.089	0.188	0.149	0.37	0.344	0.42	0.084	0.261	0.309	0.109	0.098	0.233	0.003	0.019	0.045	0.066	0.076	0.08	0.46	0.485	0.31	0.465	0.334	0.072	0.074	0.417	0.202	0.507	0.391	0.227	0.005	0.026	0.109	0.006	0.004	0.199	0.036	0.003	0
230	430	190	0.109	0.038	0.186	0.142	0.147	0.047	0.144	0.12	0.142	0.133	0.109	0.34	0.385	0.445	0.07	0.227	0.312	0.093	0.086	0.204	0.003	0.009	0.04	0.034	0.059	0.081	0.384	0.356	0.249	0.415	0.271	0.038	0.062	0.36	0.155	0.426	0.368	0.197	0.006	0.022	0.13	0.003	0.003	0.202	0.027	0	0
250	430	190	0.087	0.038	0.234	0.107	0.1	0.055	0.086	0.174	0.158	0.104	0.09	0.31	0.404	0.526	0.047	0.179	0.327	0.074	0.075	0.193	0.005	0.005	0.036	0.023	0.038	0.072	0.306	0.302	0.203	0.361	0.227	0.02	0.05	0.319	0.127	0.344	0.38	0.171	0.01	0.02	0.161	0.002	0.003	0.164	0.018	0	0.001
270	430	190	0.068	0.034	0.192	0.083	0.077	0.047	0.065	0.137	0.157	0.077	0.072	0.223	0.346	0.487	0.033	0.145	0.253	0.07	0.066	0.214	0.004	0.01	0.03	0.032	0.027	0.061	0.246	0.264	0.165	0.317	0.186	0.011	0.041	0.286	0.11	0.286	0.321	0.152	0.006	0.02	0.167	0.002	0.005	0.08	0.026	0.001	0
290	430	190	0.056	0.035	0.13	0.069	0.064	0.039	0.057	0.08	0.109	0.064	0.064	0.153	0.284	0.515	0.04	0.123	0.232	0.081	0.059	0.291	0.002	0.014	0.027	0.035	0.051	0.056	0.21	0.226	0.139	0.268	0.169	0.01	0.035	0.277	0.12	0.256	0.385	0.138	0.005	0.025	0.151	0.003	0.017	0.05	0.04	0	0
310	430	190	0.046	0.031	0.163	0.078	0.049	0.07	0.062	0.115	0.072	0.066	0.086	0.183	0.309	0.587	0.026	0.112	0.385	0.08	0.061	0.438	0.002	0.027	0.027	0.026	0.066	0.058	0.201	0.22	0.127	0.262	0.166	0.009	0.036	0.286	0.089	0.257	0.52	0.143	0.007	0.017	0.15	0.002	0.014	0.053	0.01	0	0
330	430	190	0.033	0.025	0.09	0.057	0.041	0.052	0.02	0.079	0.049	0.046	0.123	0.082	0.12	0.281	0.01	0.112	0.258	0.112	0.048	0.214	0.002	0.009	0.022	0.017	0.037	0.072	0.137	0.163	0.094	0.204	0.131	0.004	0.031	0.238	0.068	0.179	0.294	0.106	0.003	0.003	0.046	0.001	0.003	0.028	0.007	0	0
70	430	210	0.465	0.191	0.756	0.195	0.387	0.06	0.035	0.578	0.508	0.21	0.067	0.871	0.673	0.442	0.043	0.316	0.761	0.624	0.118	0.336	0.025	0.035	0.075	0.01	0.101	0.151	0.695	0.63	0.585	0.645	0.524	0.514	0.123	0.5	0.281	0.633	0.699	0.342	0.13	0.037	0.671	0.002	0.011	0.463	0.016	0.001	0
90	430	210	0.402	0.162	0.864	0.274	0.36	0.07	0.029	0.795	0.534	0.199	0.065	0.84	0.603	0.587	0.045	0.363	0.915	0.347	0.135	0.366	0.022	0.021	0.079	0.011	0.099	0.151	0.79	0.711	0.632	0.696	0.594	0.692	0.12	0.588	0.284	0.718	0.839	0.317	0.148	0.043	0.749	0.001	0.018	0.433	0.023	0.001	0
110	430	210	0.362	0.085	0.951	0.262	0.252	0.08	0.027	0.834	0.249	0.202	0.065	0.787	0.608	0.855	0.05	0.352	0.96	0.208	0.137	0.366	0.021	0.015	0.084	0.016	0.045	0.144	0.725	0.768	0.516	0.671	0.577	0.628	0.136	0.599	0.271	0.696	0.909	0.311	0.112	0.035	0.629	0.001	0.008	0.318	0.022	0.004	0
130	430	210	0.304	0.069	0.732	0.217	0.235	0.077	0.087	0.644	0.171	0.252	0.09	0.621	0.52	0.806	0.079	0.351	0.825	0.23	0.132	0.338	0.023	0.018	0.085	0.036	0.051	0.165	0.686	0.677	0.472	0.623	0.555	0.218	0.11	0.565	0.253	0.69	0.905	0.307	0.073	0.029	0.404	0.002	0.014	0.285	0.032	0.068	0.001
150	430	210	0.232	0.04	0.592	0.19	0.188	0.067	0.076	0.594	0.117	0.273	0.109	0.47	0.473	0.827	0.059	0.308	0.747	0.178	0.124	0.355	0.026	0.012	0.061	0.034	0.019	0.119	0.631	0.627	0.436	0.553	0.492	0.199	0.109	0.532	0.235	0.712	0.969	0.293	0.08	0.022	0.282	0.002	0.011	0.232	0.031	0.007	0
170	430	210	0.156	0.022	0.248	0.168	0.122	0.106	0.495	0.285	0.056	0.171	0.085	0.421	0.395	0.493	0.035	0.278	0.402	0.237	0.115	0.283	0.009	0.005	0.045	0.092	0.011	0.073	0.547	0.594	0.387	0.518	0.5	0.184	0.087	0.5	0.216	0.609	0.548	0.271	0.013	0.024	0.13	0.005	0.007	0.149	0.038	0.007	0.01
190	430	210	0.133	0.022	0.074	0.142	0.109	0.063	0.478	0.049	0.063	0.143	0.093	0.347	0.373	0.345	0.041	0.255	0.184	0.13	0.105	0.228	0.003	0.002	0.032	0.058	0.028	0.063	0.476	0.556	0.332	0.462	0.354	0.09	0.067	0.452	0.191	0.531	0.39	0.24	0.001	0.023	0.076	0.001	0.006	0.155	0.037	0.019	0
210	430	210	0.112	0.028	0.092	0.135	0.105	0.051	0.356	0.056	0.1	0.132	0.104	0.334	0.325	0.318	0.062	0.219	0.202	0.089	0.088	0.198	0.002	0.007	0.032	0.031	0.058	0.067	0.382	0.396	0.258	0.41	0.287	0.048	0.06	0.377	0.159	0.434	0.312	0.197	0.003	0.022	0.078	0.002	0.003	0.121	0.031	0.007	0
230	430	210	0.1	0.032	0.108	0.116	0.101	0.049	0.253	0.084	0.111	0.106	0.091	0.306	0.307	0.417	0.055	0.186	0.226	0.076	0.075	0.183	0.002	0.007	0.033	0.034	0.051	0.058	0.311	0.288	0.203	0.364	0.233	0.028	0.053	0.321	0.133	0.35	0.275	0.159	0.004	0.018	0.095	0.001	0.003	0.099	0.02	0	0.002
250	430	210	0.082	0.028	0.116	0.098	0.09	0.082	0.25	0.102	0.108	0.086	0.089	0.281	0.287	0.368	0.034	0.154	0.275	0.07	0.071	0.196	0.002	0.008	0.029	0.045	0.047	0.055	0.252	0.251	0.164	0.344	0.199	0.022	0.043	0.285	0.114	0.298	0.299	0.15	0.006	0.016	0.104	0.001	0.002	0.081	0.016	0.004	0
270	430	210	0.064	0.029	0.106	0.076	0.07	0.053	0.145	0.085	0.098	0.063	0.064	0.181	0.268	0.403	0.026	0.13	0.227	0.099	0.057	0.223	0.002	0.004	0.027	0.033	0.047	0.056	0.205	0.22	0.138	0.301	0.177	0.009	0.035	0.257	0.098	0.254	0.29	0.142	0.006	0.021	0.11	0.002	0.004	0.043	0.029	0	0
290	430	210	0.063	0.027	0.094	0.073	0.082	0.079	0.124	0.076	0.067	0.053	0.06	0.153	0.247	0.504	0.023	0.117	0.266	0.103	0.054	0.293	0.002	0.008	0.022	0.031	0.096	0.052	0.168	0.203	0.117	0.246	0.152	0.007	0.03	0.236	0.112	0.229	0.312	0.124	0.004	0.023	0.102	0.004	0.006	0.063	0.019	0	0
310	430	210	0.047	0.027	0.1	0.08	0.057	0.091	0.104	0.092	0.062	0.057	0.076	0.141	0.202	0.414	0.021	0.097	0.359	0.1	0.053	0.314	0.002	0.012	0.024	0.042	0.074	0.049	0.169	0.192	0.117	0.228	0.142	0.007	0.03	0.242	0.078	0.22	0.367	0.117	0.004	0.016	0.073	0.002	0.002	0.086	0.01	0	0
330	430	210	0.034	0.031	0.049	0.053	0.043	0.057	0.036	0.056	0.032	0.046	0.143	0.057	0.074	0.156	0.009	0.094	0.249	0.139	0.049	0.176	0.002	0.005	0.019	0.028	0.039	0.063	0.133	0.155	0.092	0.198	0.121	0.004	0.031	0.225	0.064	0.177	0.227	0.099	0.001	0.002	0.02	0.001	0.002	0.065	0.009	0	0
70	430	230	0.49	0.177	0.841	0.183	0.442	0.062	0.026	0.62	0.641	0.18	0.065	0.894	0.71	0.561	0.036	0.324	0.805	0.33	0.125	0.323	0.027	0.032	0.064	0.009	0.101	0.069	0.669	0.675	0.567	0.626	0.603	0.444	0.111	0.591	0.26	0.631	0.715	0.282	0.172	0.038	0.74	0.002	0.009	0.42	0.016	0.01	0
90	430	230	0.377	0.11	0.855	0.231	0.339	0.068	0.029	0.759	0.376	0.172	0.056	0.774	0.597	0.761	0.036	0.337	0.912	0.261	0.131	0.355	0.026	0.019	0.068	0.012	0.052	0.127	0.686	0.69	0.507	0.63	0.584	0.43	0.111	0.577	0.26	0.646	0.857	0.283	0.165	0.032	0.776	0.001	0.011	0.352	0.018	0.001	0
110	430	230	0.302	0.078	0.732	0.239	0.235	0.074	0.071	0.658	0.231	0.2	0.069	0.665	0.519	0.738	0.065	0.336	0.803	0.217	0.131	0.344	0.023	0.015	0.067	0.025	0.054	0.144	0.683	0.737	0.484	0.611	0.541	0.188	0.103	0.553	0.248	0.648	0.821	0.283	0.12	0.038	0.564	0.002	0.019	0.326	0.032	0.003	0.001
130	430	230	0.239	0.05	0.576	0.184	0.169	0.068	0.042	0.661	0.132	0.197	0.081	0.525	0.475	0.879	0.054	0.314	0.75	0.165	0.128	0.352	0.023	0.004	0.05	0.034	0.023	0.105	0.65	0.645	0.45	0.559	0.509	0.141	0.099	0.535	0.24	0.664	0.927	0.275	0.075	0.035	0.351	0.002	0.059	0.257	0.035	0.007	0
150	430	230	0.189	0.029	0.369	0.174	0.18	0.112	0.436	0.481	0.044	0.178	0.078	0.456	0.358	0.444	0.04	0.269	0.488	0.438	0.114	0.29	0.019	0.01	0.043	0.072	0.015	0.086	0.544	0.572	0.391	0.498	0.48	0.351	0.087	0.488	0.223	0.617	0.598	0.289	0.051	0.027	0.207	0.001	0.007	0.147	0.044	0.019	0
170	430	230	0.147	0.02	0.072	0.168	0.106	0.075	0.867	0.091	0.052	0.127	0.072	0.359	0.372	0.185	0.029	0.249	0.174	0.172	0.106	0.233	0.004	0.002	0.03	0.084	0.014	0.056	0.473	0.529	0.333	0.448	0.385	0.194	0.064	0.455	0.202	0.558	0.379	0.23	0.002	0.024	0.064	0.001	0.047	0.06	0.054	0.06	0
190	430	230	0.131	0.02	0.057	0.143	0.111	0.051	0.594	0.041	0.082	0.13	0.101	0.333	0.333	0.189	0.051	0.216	0.165	0.102	0.092	0.199	0.002	0.004	0.026	0.066	0.058	0.058	0.389	0.488	0.267	0.4	0.304	0.077	0.055	0.404	0.168	0.456	0.312	0.2	0.002	0.025	0.055	0.001	0.004	0.067	0.05	0.032	0
210	430	230	0.109	0.025	0.056	0.125	0.108	0.049	0.468	0.045	0.079	0.121	0.101	0.317	0.296	0.266	0.067	0.173	0.183	0.082	0.075	0.166	0.001	0.006	0.026	0.049	0.084	0.054	0.314	0.314	0.202	0.358	0.244	0.053	0.051	0.325	0.13	0.356	0.261	0.156	0.003	0.019	0.057	0.001	0.002	0.063	0.031	0.003	0
230	430	230	0.089	0.024	0.067	0.105	0.095	0.051	0.381	0.063	0.073	0.099	0.088	0.291	0.271	0.31	0.046	0.154	0.196	0.067	0.066	0.15	0.002	0.006	0.028	0.038	0.07	0.051	0.268	0.245	0.164	0.344	0.205	0.025	0.047	0.286	0.11	0.297	0.23	0.13	0.004	0.018	0.066	0.001	0.002	0.065	0.022	0.002	0
250	430	230	0.072	0.023	0.071	0.091	0.086	0.065	0.342	0.072	0.073	0.084	0.091	0.247	0.259	0.271	0.028	0.135	0.254	0.074	0.061	0.179	0.001	0.006	0.027	0.05	0.072	0.052	0.221	0.234	0.141	0.332	0.173	0.016	0.041	0.256	0.097	0.262	0.271	0.123	0.004	0.018	0.079	0.001	0.009	0.058	0.019	0.003	0
270	430	230	0.055	0.025	0.06	0.087	0.069	0.07	0.22	0.063	0.061	0.06	0.065	0.159	0.222	0.244	0.022	0.12	0.265	0.118	0.054	0.181	0.002	0.003	0.023	0.036	0.086	0.054	0.179	0.215	0.12	0.287	0.152	0.01	0.033	0.238	0.092	0.238	0.265	0.124	0.004	0.019	0.063	0.002	0.025	0.048	0.029	0.003	0.001
290	430	230	0.06	0.027	0.055	0.09	0.078	0.093	0.177	0.048	0.052	0.057	0.061	0.133	0.177	0.257	0.021	0.106	0.291	0.126	0.052	0.2	0.003	0.005	0.021	0.035	0.082	0.047	0.163	0.193	0.114	0.24	0.142	0.008	0.033	0.237	0.11	0.223	0.245	0.108	0.003	0.021	0.033	0.001	0.003	0.087	0.013	0	0
310	430	230	0.038	0.032	0.031	0.064	0.048	0.05	0.095	0.036	0.047	0.049	0.067	0.085	0.117	0.169	0.019	0.09	0.263	0.133	0.046	0.165	0.003	0.003	0.021	0.034	0.039	0.043	0.143	0.163	0.1	0.209	0.124	0.007	0.029	0.224	0.068	0.187	0.189	0.088	0.001	0.012	0.007	0.001	0.001	0.103	0.009	0	0
330	430	230	0.03	0.04	0.017	0.046	0.038	0.03	0.029	0.015	0.03	0.039	0.152	0.037	0.059	0.1	0.008	0.094	0.183	0.169	0.043	0.118	0.002	0.002	0.016	0.014	0.037	0.04	0.115	0.13	0.078	0.173	0.102	0.003	0.023	0.198	0.054	0.152	0.131	0.075	0.001	0.002	0.004	0.001	0.001	0.067	0.007	0	0
50	430	250	0.367	0.059	0.362	0.078	0.201	0.021	0.01	0.188	0.183	0.087	0.032	0.308	0.357	0.275	0.017	0.154	0.244	0.281	0.064	0.156	0.01	0.017	0.047	0.013	0.028	0.034	0.326	0.372	0.246	0.33	0.253	0.055	0.064	0.255	0.128	0.279	0.254	0.117	0.063	0.029	0.4	0.003	0.008	0.137	0.01	0.005	0.001
70	430	250	0.357	0.073	0.823	0.16	0.403	0.053	0.035	0.457	0.503	0.184	0.055	0.753	0.665	0.632	0.027	0.295	0.663	0.41	0.118	0.313	0.018	0.019	0.04	0.011	0.045	0.06	0.618	0.662	0.48	0.538	0.487	0.118	0.09	0.489	0.218	0.517	0.655	0.226	0.167	0.033	0.756	0.001	0.005	0.341	0.013	0.024	0.002
90	430	250	0.322	0.072	0.732	0.223	0.294	0.067	0.083	0.622	0.29	0.183	0.055	0.701	0.467	0.75	0.037	0.32	0.756	0.252	0.131	0.367	0.028	0.015	0.051	0.017	0.051	0.076	0.69	0.706	0.49	0.593	0.546	0.092	0.093	0.545	0.239	0.583	0.81	0.261	0.14	0.032	0.61	0.002	0.004	0.336	0.021	0.029	0
110	430	250	0.264	0.053	0.666	0.225	0.202	0.057	0.033	0.71	0.188	0.19	0.062	0.622	0.428	0.897	0.04	0.308	0.745	0.187	0.13	0.384	0.032	0.023	0.04	0.043	0.027	0.096	0.676	0.738	0.476	0.573	0.532	0.084	0.098	0.551	0.238	0.616	0.879	0.259	0.142	0.029	0.48	0.003	0.006	0.349	0.028	0.003	0
130	430	250	0.205	0.027	0.542	0.166	0.147	0.075	0.104	0.635	0.054	0.152	0.064	0.525	0.401	0.628	0.039	0.28	0.643	0.297	0.119	0.338	0.025	0.004	0.035	0.033	0.017	0.148	0.579	0.599	0.422	0.5	0.445	0.244	0.089	0.513	0.218	0.594	0.666	0.252	0.105	0.028	0.281	0.003	0.024	0.225	0.036	0.001	0
150	430	250	0.175	0.024	0.162	0.175	0.147	0.082	0.901	0.259	0.066	0.116	0.059	0.417	0.308	0.134	0.026	0.244	0.243	0.299	0.106	0.237	0.007	0.003	0.03	0.145	0.04	0.063	0.507	0.544	0.359	0.445	0.417	0.218	0.068	0.473	0.2	0.556	0.392	0.224	0.018	0.027	0.112	0.001	0.025	0.041	0.052	0.093	0.01
170	430	250	0.131	0.018	0.055	0.135	0.09	0.049	0.847	0.041	0.061	0.103	0.066	0.32	0.289	0.115	0.036	0.215	0.17	0.097	0.093	0.204	0.002	0.001	0.022	0.092	0.046	0.063	0.423	0.476	0.293	0.397	0.32	0.141	0.056	0.418	0.174	0.477	0.31	0.193	0.001	0.029	0.048	0.001	0.064	0.047	0.059	0.213	0
190	430	250	0.119	0.019	0.04	0.117	0.106	0.064	0.571	0.035	0.058	0.127	0.09	0.304	0.306	0.147	0.053	0.169	0.156	0.078	0.08	0.16	0.002	0.003	0.023	0.045	0.125	0.052	0.327	0.421	0.215	0.349	0.266	0.061	0.05	0.335	0.137	0.353	0.247	0.157	0.003	0.023	0.059	0.001	0.004	0.035	0.048	0.07	0
210	430	250	0.095	0.024	0.043	0.106	0.101	0.061	0.453	0.038	0.058	0.105	0.088	0.282	0.272	0.168	0.048	0.145	0.172	0.068	0.07	0.143	0.002	0.004	0.024	0.033	0.118	0.048	0.263	0.272	0.167	0.316	0.214	0.043	0.046	0.286	0.114	0.298	0.211	0.128	0.003	0.017	0.055	0.001	0.002	0.039	0.034	0.022	0
230	430	250	0.079	0.024	0.065	0.095	0.085	0.059	0.385	0.071	0.053	0.092	0.074	0.264	0.271	0.225	0.04	0.14	0.214	0.075	0.062	0.132	0.002	0.005	0.024	0.033	0.1	0.049	0.23	0.232	0.14	0.321	0.182	0.031	0.043	0.258	0.099	0.264	0.187	0.122	0.005	0.016	0.071	0.001	0.002	0.061	0.024	0.001	0
250	430	250	0.061	0.027	0.063	0.09	0.077	0.062	0.301	0.07	0.059	0.073	0.061	0.194	0.23	0.194	0.028	0.136	0.205	0.103	0.053	0.13	0.002	0.003	0.023	0.034	0.092	0.05	0.198	0.216	0.122	0.286	0.158	0.015	0.036	0.236	0.091	0.238	0.178	0.11	0.002	0.015	0.053	0.001	0.017	0.065	0.023	0	0
270	430	250	0.056	0.032	0.025	0.087	0.063	0.048	0.234	0.043	0.041	0.051	0.048	0.105	0.137	0.12	0.018	0.119	0.181	0.131	0.047	0.124	0.002	0.003	0.02	0.027	0.075	0.057	0.161	0.191	0.104	0.234	0.134	0.011	0.031	0.218	0.086	0.211	0.147	0.095	0.001	0.017	0.014	0.002	0.005	0.062	0.023	0	0
290	430	250	0.046	0.032	0.019	0.068	0.064	0.052	0.178	0.019	0.046	0.051	0.05	0.079	0.115	0.131	0.017	0.107	0.185	0.137	0.044	0.124	0.005	0.003	0.017	0.019	0.061	0.043	0.144	0.175	0.099	0.204	0.125	0.011	0.033	0.215	0.101	0.193	0.137	0.087	0.002	0.015	0.007	0.001	0.002	0.086	0.017	0.002	0
310	430	250	0.033	0.041	0.014	0.046	0.038	0.026	0.079	0.011	0.027	0.043	0.052	0.049	0.092	0.102	0.014	0.091	0.144	0.137	0.038	0.114	0.004	0.001	0.016	0.012	0.036	0.036	0.118	0.142	0.083	0.171	0.107	0.005	0.024	0.196	0.057	0.152	0.113	0.071	0.002	0.008	0.004	0.001	0.001	0.062	0.013	0.001	0
330	430	250	0.027	0.031	0.013	0.048	0.037	0.032	0.026	0.008	0.017	0.039	0.107	0.038	0.061	0.093	0.007	0.124	0.157	0.179	0.04	0.109	0.004	0.002	0.016	0.006	0.045	0.035	0.101	0.124	0.069	0.152	0.09	0.004	0.021	0.18	0.05	0.138	0.103	0.066	0.002	0.001	0.004	0.001	0.001	0.062	0.012	0	0
350	430	250	0.021	0.027	0.012	0.035	0.036	0.024	0.009	0.008	0.025	0.023	0.045	0.02	0.004	0.032	0	0.085	0.105	0.191	0.039	0.076	0.003	0.002	0.004	0.007	0.03	0.034	0.089	0.105	0.056	0.124	0.08	0.002	0.019	0.154	0.043	0.118	0.089	0.067	0.001	0	0.003	0	0.006	0.036	0.009	0	0
50	430	270	0.256	0.033	0.261	0.09	0.117	0.018	0.005	0.184	0.188	0.071	0.035	0.311	0.263	0.327	0.017	0.141	0.149	0.159	0.06	0.137	0.005	0.028	0.025	0.004	0.007	0.025	0.338	0.417	0.245	0.314	0.258	0.013	0.052	0.283	0.128	0.283	0.275	0.112	0.04	0.031	0.373	0.003	0.021	0.082	0.018	0.007	0
70	430	270	0.262	0.041	0.789	0.132	0.344	0.041	0.017	0.385	0.312	0.183	0.065	0.681	0.661	0.777	0.022	0.276	0.544	0.167	0.11	0.307	0.037	0.031	0.032	0.014	0.014	0.062	0.673	0.727	0.479	0.546	0.454	0.028	0.092	0.524	0.213	0.534	0.761	0.224	0.163	0.025	0.651	0.001	0.04	0.33	0.028	0.004	0.003
90	430	270	0.259	0.033	0.707	0.197	0.233	0.061	0.014	0.547	0.101	0.168	0.057	0.692	0.472	0.874	0.028	0.287	0.746	0.164	0.117	0.401	0.048	0.012	0.031	0.013	0.013	0.057	0.668	0.674	0.47	0.529	0.47	0.054	0.094	0.56	0.212	0.55	0.879	0.23	0.174	0.019	0.554	0.001	0.005	0.369	0.02	0.002	0
110	430	270	0.227	0.033	0.62	0.189	0.168	0.073	0.025	0.709	0.062	0.16	0.058	0.601	0.4	0.824	0.037	0.268	0.735	0.159	0.109	0.383	0.039	0.02	0.03	0.029	0.01	0.08	0.595	0.652	0.415	0.488	0.44	0.093	0.098	0.519	0.199	0.52	0.79	0.233	0.15	0.021	0.441	0.001	0.008	0.325	0.025	0	0
130	430	270	0.186	0.021	0.4	0.169	0.158	0.077	0.358	0.584	0.054	0.128	0.048	0.518	0.366	0.308	0.033	0.252	0.51	0.2	0.104	0.276	0.019	0.007	0.035	0.063	0.033	0.161	0.536	0.548	0.386	0.471	0.445	0.343	0.089	0.499	0.194	0.53	0.51	0.224	0.088	0.024	0.231	0.001	0.02	0.122	0.047	0.05	0.001
150	430	270	0.149	0.021	0.062	0.132	0.105	0.041	1	0.122	0.098	0.1	0.05	0.329	0.296	0.089	0.022	0.208	0.171	0.113	0.087	0.207	0.004	0.001	0.021	0.09	0.075	0.07	0.445	0.472	0.299	0.397	0.369	0.191	0.058	0.432	0.169	0.469	0.342	0.192	0.002	0.035	0.071	0.001	0.041	0.011	0.098	0.408	0.004
170	430	270	0.125	0.02	0.043	0.119	0.1	0.049	0.68	0.03	0.052	0.109	0.069	0.254	0.331	0.11	0.048	0.175	0.138	0.099	0.077	0.181	0.002	0.002	0.019	0.047	0.073	0.056	0.371	0.414	0.25	0.349	0.319	0.135	0.052	0.373	0.15	0.385	0.288	0.172	0.002	0.037	0.049	0.002	0.022	0.038	0.098	0.343	0
190	430	270	0.119	0.021	0.027	0.113	0.117	0.071	0.474	0.025	0.032	0.122	0.078	0.26	0.283	0.131	0.06	0.142	0.131	0.078	0.069	0.145	0.002	0.006	0.021	0.04	0.119	0.047	0.286	0.391	0.188	0.29	0.254	0.07	0.047	0.302	0.116	0.292	0.226	0.136	0.004	0.021	0.043	0.001	0.004	0.018	0.06	0.033	0
210	430	270	0.089	0.027	0.026	0.098	0.104	0.078	0.384	0.033	0.047	0.097	0.078	0.253	0.268	0.148	0.044	0.128	0.165	0.078	0.064	0.13	0.002	0.005	0.02	0.041	0.121	0.045	0.236	0.248	0.146	0.264	0.205	0.036	0.039	0.266	0.101	0.271	0.212	0.124	0.005	0.015	0.041	0.001	0.002	0.026	0.036	0.002	0
230	430	270	0.068	0.029	0.047	0.084	0.083	0.056	0.359	0.052	0.051	0.078	0.063	0.22	0.247	0.179	0.031	0.126	0.181	0.092	0.056	0.137	0.002	0.004	0.022	0.038	0.108	0.045	0.207	0.215	0.125	0.254	0.173	0.021	0.035	0.24	0.092	0.246	0.185	0.134	0.004	0.014	0.051	0.001	0.002	0.05	0.023	0	0
250	430	270	0.054	0.033	0.04	0.069	0.074	0.045	0.236	0.046	0.045	0.056	0.045	0.13	0.175	0.142	0.025	0.127	0.149	0.143	0.045	0.118	0.002	0.002	0.019	0.026	0.075	0.043	0.169	0.189	0.102	0.233	0.143	0.012	0.03	0.213	0.081	0.216	0.143	0.106	0.001	0.016	0.025	0.002	0.023	0.053	0.026	0	0
270	430	270	0.053	0.04	0.018	0.057	0.07	0.032	0.189	0.03	0.026	0.05	0.043	0.08	0.111	0.113	0.018	0.13	0.128	0.179	0.042	0.112	0.002	0.002	0.016	0.021	0.057	0.038	0.141	0.17	0.086	0.202	0.119	0.008	0.026	0.193	0.077	0.188	0.124	0.087	0.001	0.015	0.006	0.001	0.004	0.07	0.02	0	0
290	430	270	0.039	0.04	0.015	0.046	0.052	0.025	0.133	0.013	0.022	0.046	0.041	0.055	0.094	0.105	0.016	0.106	0.116	0.173	0.038	0.096	0.001	0.002	0.017	0.012	0.046	0.041	0.123	0.151	0.079	0.18	0.108	0.008	0.023	0.189	0.09	0.162	0.11	0.076	0	0.014	0.003	0.001	0.002	0.068	0.017	0.007	0
310	430	270	0.03	0.042	0.011	0.034	0.035	0.016	0.07	0.007	0.012	0.039	0.037	0.031	0.074	0.082	0.012	0.076	0.093	0.182	0.032	0.082	0.001	0.001	0.013	0.007	0.032	0.037	0.098	0.119	0.066	0.147	0.087	0.005	0.018	0.171	0.049	0.123	0.089	0.06	0	0.006	0.001	0.001	0.002	0.041	0.011	0	0
330	430	270	0.026	0.029	0.009	0.03	0.034	0.013	0.029	0.004	0.009	0.035	0.051	0.021	0.047	0.073	0.006	0.099	0.116	0.239	0.03	0.087	0.001	0.001	0.012	0.002	0.033	0.027	0.083	0.101	0.056	0.131	0.074	0.003	0.015	0.159	0.04	0.102	0.085	0.052	0	0.001	0.002	0.001	0	0.047	0.007	0	0
350	430	270	0.021	0.021	0.009	0.03	0.036	0.013	0.014	0.004	0.009	0.021	0.011	0.015	0.002	0.03	0	0.119	0.09	0.251	0.03	0.07	0.001	0.001	0.004	0.003	0.033	0.026	0.081	0.103	0.052	0.122	0.074	0.001	0.015	0.148	0.043	0.107	0.086	0.058	0	0	0.003	0.001	0.005	0.041	0.007	0	0
50	430	290	0.149	0.038	0.168	0.085	0.08	0.015	0.002	0.09	0.122	0.036	0.023	0.241	0.183	0.123	0.015	0.096	0.09	0.083	0.05	0.099	0.002	0.019	0.022	0.004	0.01	0.018	0.249	0.281	0.167	0.245	0.186	0.007	0.043	0.213	0.1	0.198	0.18	0.073	0.019	0.022	0.289	0.002	0.018	0.029	0.017	0	0
70	430	290	0.202	0.033	0.526	0.089	0.285	0.026	0.006	0.301	0.183	0.095	0.051	0.459	0.321	0.358	0.029	0.184	0.332	0.16	0.083	0.222	0.016	0.024	0.058	0.011	0.008	0.048	0.438	0.488	0.315	0.4	0.338	0.071	0.071	0.383	0.162	0.377	0.412	0.156	0.195	0.053	0.552	0.001	0.081	0.21	0.034	0.002	0.001
90	430	290	0.236	0.026	0.629	0.106	0.252	0.06	0.018	0.472	0.052	0.123	0.051	0.59	0.494	0.471	0.036	0.226	0.651	0.176	0.094	0.35	0.03	0.006	0.028	0.018	0.007	0.071	0.503	0.474	0.357	0.434	0.397	0.249	0.077	0.506	0.174	0.445	0.49	0.195	0.257	0.023	0.569	0.001	0.004	0.241	0.027	0.003	0
110	430	290	0.212	0.036	0.568	0.127	0.136	0.065	0.027	0.656	0.032	0.127	0.051	0.588	0.39	0.41	0.035	0.231	0.698	0.193	0.092	0.311	0.025	0.031	0.023	0.017	0.009	0.115	0.5	0.523	0.34	0.412	0.383	0.622	0.085	0.497	0.17	0.456	0.482	0.202	0.185	0.019	0.431	0.001	0.002	0.176	0.024	0.001	0
130	430	290	0.18	0.021	0.333	0.156	0.139	0.045	0.486	0.568	0.072	0.096	0.04	0.505	0.41	0.116	0.031	0.23	0.432	0.338	0.092	0.216	0.008	0.009	0.019	0.062	0.035	0.229	0.464	0.45	0.33	0.422	0.449	0.643	0.072	0.487	0.17	0.492	0.379	0.208	0.102	0.024	0.244	0.001	0.003	0.04	0.052	0.145	0
150	430	290	0.14	0.021	0.044	0.11	0.104	0.036	0.661	0.095	0.091	0.104	0.051	0.309	0.478	0.088	0.025	0.192	0.158	0.161	0.079	0.187	0.003	0.001	0.017	0.099	0.053	0.054	0.406	0.404	0.284	0.375	0.371	0.204	0.054	0.417	0.155	0.424	0.383	0.216	0.001	0.027	0.081	0.001	0.006	0.009	0.128	0.137	0
170	430	290	0.11	0.019	0.029	0.098	0.104	0.039	0.382	0.027	0.035	0.098	0.063	0.208	0.442	0.101	0.033	0.175	0.126	0.097	0.073	0.174	0.002	0.001	0.023	0.074	0.036	0.055	0.352	0.386	0.243	0.348	0.322	0.11	0.049	0.376	0.141	0.38	0.399	0.19	0.001	0.025	0.034	0.001	0.008	0.02	0.116	0.011	0
190	430	290	0.101	0.02	0.021	0.093	0.127	0.049	0.314	0.021	0.024	0.09	0.074	0.169	0.339	0.112	0.048	0.144	0.111	0.088	0.061	0.139	0.002	0.004	0.019	0.062	0.061	0.049	0.277	0.379	0.183	0.292	0.259	0.051	0.043	0.299	0.112	0.293	0.28	0.145	0.002	0.02	0.025	0.001	0.007	0.007	0.06	0.003	0
210	430	290	0.085	0.021	0.021	0.081	0.103	0.044	0.301	0.024	0.029	0.081	0.068	0.175	0.287	0.126	0.035	0.119	0.127	0.083	0.051	0.121	0.002	0.004	0.018	0.046	0.09	0.042	0.213	0.223	0.136	0.242	0.2	0.04	0.037	0.247	0.093	0.253	0.187	0.114	0.003	0.015	0.024	0.001	0.001	0.016	0.042	0	0
230	430	290	0.06	0.024	0.028	0.062	0.072	0.033	0.207	0.03	0.032	0.059	0.049	0.132	0.222	0.12	0.022	0.111	0.122	0.131	0.044	0.12	0.002	0.003	0.016	0.044	0.06	0.038	0.177	0.182	0.105	0.213	0.155	0.022	0.031	0.212	0.081	0.213	0.146	0.109	0.002	0.013	0.02	0.001	0.002	0.025	0.044	0	0
250	430	290	0.056	0.029	0.032	0.051	0.069	0.027	0.131	0.033	0.026	0.046	0.037	0.069	0.132	0.105	0.016	0.114	0.102	0.17	0.037	0.098	0.002	0.002	0.015	0.019	0.042	0.034	0.14	0.157	0.081	0.19	0.124	0.013	0.025	0.181	0.069	0.181	0.11	0.085	0.001	0.015	0.014	0.002	0.002	0.034	0.03	0	0
270	430	290	0.047	0.033	0.017	0.051	0.069	0.028	0.133	0.025	0.02	0.046	0.039	0.062	0.098	0.109	0.016	0.121	0.109	0.19	0.037	0.096	0.001	0.001	0.014	0.017	0.044	0.03	0.128	0.151	0.074	0.177	0.109	0.008	0.022	0.173	0.068	0.172	0.105	0.082	0	0.013	0.006	0.001	0.003	0.049	0.02	0	0
290	430	290	0.034	0.035	0.013	0.043	0.041	0.023	0.107	0.009	0.016	0.042	0.036	0.046	0.082	0.094	0.015	0.104	0.097	0.194	0.037	0.082	0.001	0.001	0.015	0.01	0.038	0.031	0.118	0.144	0.071	0.167	0.105	0.006	0.02	0.178	0.087	0.162	0.102	0.082	0	0.01	0.002	0.001	0.001	0.028	0.015	0	0
310	430	290	0.027	0.034	0.01	0.033	0.031	0.015	0.072	0.004	0.007	0.037	0.032	0.028	0.07	0.077	0.011	0.098	0.067	0.213	0.03	0.068	0.001	0.001	0.014	0.007	0.029	0.027	0.093	0.112	0.061	0.143	0.085	0.004	0.017	0.167	0.047	0.122	0.084	0.069	0	0.005	0.001	0.002	0	0.024	0.008	0	0
330	430	290	0.024	0.022	0.008	0.028	0.032	0.011	0.024	0.003	0.006	0.036	0.038	0.016	0.041	0.075	0.005	0.167	0.061	0.237	0.027	0.062	0.001	0.001	0.011	0.002	0.03	0.025	0.077	0.097	0.05	0.13	0.071	0.002	0.014	0.148	0.039	0.099	0.079	0.055	0	0.001	0.003	0.002	0.001	0.037	0.007	0	0
350	430	290	0.021	0.021	0.008	0.031	0.038	0.011	0.01	0.004	0.007	0.023	0.006	0.013	0	0.037	0	0.134	0.058	0.251	0.027	0.07	0.001	0.001	0.005	0.002	0.034	0.026	0.084	0.105	0.05	0.127	0.074	0.001	0.015	0.151	0.043	0.106	0.083	0.055	0	0	0.003	0	0.006	0.032	0.009	0	0
190	450	110	0.066	0.105	0.537	0.114	0.056	0.038	0.003	0.13	0.16	0.12	0.108	0.443	0.728	0.573	0.044	0.182	0.331	0.151	0.094	0.215	0.01	0.014	0.051	0.013	0.008	0.063	0.449	0.426	0.276	0.432	0.299	0.039	0.086	0.421	0.163	0.433	0.548	0.222	0.027	0.015	0.504	0.001	0.034	0.195	0.005	0.002	0
210	450	110	0.056	0.053	0.458	0.13	0.057	0.044	0.005	0.115	0.174	0.099	0.098	0.366	0.61	0.57	0.049	0.183	0.393	0.151	0.089	0.202	0.007	0.033	0.054	0.017	0.007	0.057	0.408	0.426	0.291	0.42	0.29	0.08	0.079	0.387	0.158	0.441	0.383	0.212	0.021	0.014	0.419	0.001	0.009	0.12	0.004	0.001	0
230	450	110	0.065	0.027	0.428	0.097	0.063	0.039	0.003	0.058	0.208	0.106	0.082	0.327	0.588	0.652	0.034	0.176	0.249	0.116	0.082	0.182	0.002	0.013	0.053	0.013	0.008	0.063	0.378	0.362	0.247	0.417	0.292	0.036	0.063	0.365	0.155	0.421	0.4	0.218	0.013	0.013	0.378	0.001	0.001	0.086	0.005	0.006	0
250	450	110	0.059	0.036	0.319	0.075	0.065	0.034	0.004	0.052	0.292	0.079	0.077	0.28	0.499	0.497	0.033	0.143	0.119	0.086	0.071	0.156	0.001	0.003	0.053	0.012	0.008	0.069	0.31	0.306	0.188	0.39	0.239	0.01	0.052	0.338	0.125	0.329	0.377	0.188	0.011	0.021	0.306	0.001	0.002	0.058	0.007	0.014	0
270	450	110	0.05	0.041	0.228	0.062	0.069	0.025	0.005	0.033	0.141	0.076	0.056	0.162	0.336	0.283	0.029	0.118	0.098	0.099	0.066	0.139	0.001	0.001	0.045	0.016	0.015	0.085	0.216	0.219	0.143	0.287	0.186	0.009	0.043	0.269	0.089	0.226	0.253	0.192	0.004	0.017	0.125	0.001	0.001	0.02	0.011	0	0
150	450	130	0.194	0.177	0.761	0.142	0.154	0.057	0.021	0.258	0.463	0.187	0.114	0.696	0.95	0.584	0.064	0.289	0.714	0.232	0.124	0.281	0.015	0.03	0.08	0.019	0.063	0.192	0.611	0.587	0.465	0.573	0.403	0.361	0.121	0.519	0.218	0.576	0.65	0.281	0.02	0.028	0.743	0.001	0.012	0.298	0.012	0.035	0
170	450	130	0.158	0.111	0.781	0.17	0.138	0.061	0.037	0.313	0.362	0.208	0.123	0.61	0.862	0.668	0.06	0.311	0.66	0.195	0.129	0.293	0.019	0.024	0.071	0.029	0.031	0.088	0.643	0.622	0.437	0.582	0.432	0.101	0.116	0.531	0.231	0.658	0.785	0.303	0.019	0.034	0.673	0.002	0.013	0.256	0.013	0.005	0
190	450	130	0.106	0.045	0.765	0.162	0.099	0.063	0.012	0.378	0.319	0.204	0.128	0.52	0.818	0.669	0.056	0.316	0.662	0.247	0.132	0.283	0.023	0.032	0.069	0.026	0.01	0.097	0.628	0.642	0.437	0.582	0.43	0.115	0.11	0.542	0.23	0.667	0.731	0.313	0.031	0.029	0.519	0.001	0.003	0.243	0.013	0	0
210	450	130	0.088	0.032	0.538	0.156	0.092	0.062	0.011	0.269	0.279	0.165	0.108	0.453	0.641	0.905	0.052	0.289	0.581	0.178	0.125	0.263	0.008	0.054	0.067	0.029	0.016	0.091	0.585	0.592	0.405	0.603	0.44	0.161	0.099	0.546	0.247	0.629	0.564	0.305	0.017	0.031	0.394	0.002	0.015	0.21	0.015	0	0
230	450	130	0.093	0.042	0.368	0.144	0.153	0.05	0.018	0.095	0.242	0.16	0.117	0.376	0.643	0.624	0.073	0.227	0.249	0.117	0.103	0.216	0.001	0.056	0.069	0.037	0.032	0.083	0.48	0.434	0.314	0.54	0.366	0.035	0.078	0.443	0.218	0.501	0.473	0.26	0.009	0.039	0.34	0.003	0.005	0.165	0.018	0.001	0
250	450	130	0.081	0.043	0.274	0.104	0.155	0.042	0.012	0.054	0.281	0.099	0.096	0.308	0.604	0.499	0.058	0.168	0.128	0.098	0.081	0.194	0.001	0.016	0.058	0.025	0.015	0.08	0.352	0.346	0.226	0.464	0.272	0.013	0.059	0.357	0.159	0.366	0.357	0.208	0.009	0.027	0.302	0.002	0.003	0.115	0.011	0.005	0
270	450	130	0.058	0.041	0.218	0.075	0.123	0.03	0.008	0.041	0.243	0.069	0.067	0.213	0.444	0.331	0.028	0.134	0.102	0.099	0.067	0.143	0.001	0.003	0.045	0.017	0.015	0.076	0.248	0.255	0.158	0.331	0.189	0.007	0.043	0.286	0.104	0.266	0.261	0.168	0.008	0.025	0.194	0.001	0.003	0.071	0.01	0.001	0
290	450	130	0.049	0.036	0.069	0.094	0.125	0.025	0.004	0.047	0.075	0.076	0.059	0.068	0.216	0.186	0.033	0.104	0.174	0.109	0.055	0.16	0.001	0.001	0.037	0.015	0.022	0.143	0.172	0.169	0.121	0.229	0.168	0.007	0.058	0.238	0.09	0.191	0.185	0.191	0.004	0.021	0.028	0.001	0.005	0.015	0.022	0	0
110	450	150	0.311	0.152	0.709	0.191	0.194	0.053	0.012	0.365	0.609	0.249	0.082	0.847	0.784	0.4	0.063	0.325	0.744	0.51	0.124	0.319	0.018	0.044	0.056	0.014	0.149	0.148	0.68	0.64	0.895	0.665	0.512	0.724	0.106	0.495	0.246	0.559	0.596	0.347	0.025	0.024	0.618	0.002	0.006	0.429	0.009	0	0
130	450	150	0.273	0.155	0.835	0.193	0.209	0.062	0.011	0.489	0.59	0.241	0.097	0.842	0.876	0.652	0.065	0.356	0.889	0.268	0.146	0.331	0.015	0.057	0.077	0.015	0.101	0.12	0.758	0.759	0.775	0.705	0.571	0.732	0.124	0.57	0.276	0.681	0.739	0.353	0.038	0.038	0.726	0.001	0.013	0.397	0.016	0	0
150	450	150	0.214	0.102	0.816	0.2	0.174	0.074	0.028	0.437	0.387	0.241	0.106	0.705	0.791	0.766	0.056	0.385	0.884	0.199	0.141	0.323	0.017	0.054	0.083	0.023	0.056	0.118	0.715	0.683	0.513	0.677	0.51	0.352	0.122	0.541	0.264	0.707	0.837	0.318	0.026	0.034	0.69	0.002	0.011	0.303	0.017	0.018	0
170	450	150	0.167	0.075	0.759	0.192	0.15	0.066	0.048	0.49	0.312	0.235	0.125	0.579	0.675	0.83	0.062	0.372	0.778	0.569	0.142	0.32	0.017	0.026	0.073	0.03	0.028	0.107	0.715	0.699	0.495	0.644	0.475	0.108	0.122	0.54	0.253	0.752	0.838	0.337	0.026	0.03	0.498	0.002	0.015	0.298	0.016	0.001	0
190	450	150	0.118	0.043	0.699	0.17	0.114	0.073	0.02	0.508	0.193	0.214	0.113	0.481	0.564	0.882	0.061	0.348	0.777	0.487	0.144	0.292	0.015	0.015	0.065	0.038	0.012	0.132	0.684	0.689	0.474	0.614	0.516	0.203	0.113	0.571	0.246	0.72	0.739	0.298	0.036	0.029	0.345	0.002	0.006	0.242	0.017	0	0
210	450	150	0.107	0.035	0.396	0.181	0.113	0.056	0.033	0.237	0.187	0.22	0.127	0.432	0.488	0.816	0.093	0.309	0.499	0.145	0.13	0.26	0.004	0.06	0.066	0.068	0.044	0.108	0.59	0.612	0.386	0.596	0.432	0.065	0.089	0.511	0.276	0.612	0.519	0.288	0.011	0.036	0.267	0.008	0.015	0.223	0.027	0	0
230	450	150	0.125	0.043	0.301	0.18	0.17	0.053	0.039	0.119	0.204	0.207	0.151	0.357	0.515	0.612	0.133	0.24	0.319	0.137	0.103	0.23	0.001	0.072	0.066	0.07	0.049	0.098	0.476	0.414	0.305	0.529	0.367	0.034	0.076	0.415	0.244	0.512	0.402	0.259	0.008	0.04	0.237	0.01	0.006	0.191	0.025	0	0
250	450	150	0.092	0.045	0.242	0.115	0.195	0.043	0.027	0.068	0.24	0.111	0.096	0.291	0.551	0.464	0.063	0.182	0.181	0.106	0.083	0.208	0.001	0.017	0.051	0.027	0.021	0.086	0.356	0.307	0.234	0.438	0.272	0.017	0.056	0.352	0.162	0.396	0.336	0.209	0.004	0.029	0.252	0.003	0.004	0.177	0.014	0.001	0
270	450	150	0.063	0.044	0.187	0.077	0.181	0.036	0.02	0.047	0.264	0.078	0.082	0.232	0.462	0.303	0.033	0.137	0.127	0.102	0.07	0.155	0.001	0.006	0.042	0.021	0.016	0.075	0.265	0.247	0.172	0.356	0.206	0.007	0.043	0.298	0.115	0.299	0.276	0.16	0.004	0.024	0.231	0.002	0.003	0.127	0.012	0.002	0
290	450	150	0.055	0.05	0.071	0.064	0.182	0.026	0.008	0.033	0.117	0.059	0.055	0.077	0.23	0.159	0.026	0.131	0.11	0.133	0.059	0.12	0.001	0.002	0.033	0.026	0.023	0.106	0.173	0.181	0.118	0.25	0.148	0.005	0.042	0.234	0.094	0.199	0.171	0.115	0.004	0.023	0.06	0.001	0.009	0.031	0.028	0	0
90	450	170	0.307	0.14	0.642	0.19	0.169	0.044	0.02	0.285	0.578	0.211	0.06	0.706	0.744	0.361	0.044	0.285	0.619	0.428	0.102	0.265	0.017	0.046	0.051	0.015	0.114	0.207	0.597	0.559	0.632	0.568	0.407	0.501	0.09	0.42	0.202	0.465	0.516	0.284	0.021	0.019	0.575	0.001	0.004	0.411	0.01	0	0
110	450	170	0.335	0.161	0.891	0.23	0.232	0.061	0.017	0.549	0.767	0.248	0.076	0.89	0.937	0.599	0.057	0.391	0.881	0.418	0.143	0.339	0.017	0.022	0.073	0.018	0.124	0.147	0.81	0.778	0.885	0.759	0.575	0.907	0.121	0.585	0.28	0.652	0.765	0.333	0.023	0.032	0.727	0.001	0.014	0.452	0.019	0	0
130	450	170	0.276	0.1	0.996	0.232	0.202	0.077	0.024	0.568	0.472	0.239	0.086	0.767	0.843	0.884	0.052	0.38	1	0.252	0.146	0.339	0.017	0.028	0.09	0.019	0.052	0.108	0.748	0.793	0.574	0.718	0.535	0.593	0.123	0.581	0.269	0.705	0.862	0.348	0.033	0.03	0.718	0.001	0.007	0.322	0.016	0.007	0
150	450	170	0.227	0.087	0.789	0.224	0.188	0.087	0.06	0.523	0.342	0.276	0.11	0.623	0.652	0.839	0.065	0.404	0.83	0.227	0.137	0.34	0.018	0.047	0.083	0.031	0.055	0.14	0.705	0.706	0.518	0.671	0.524	0.214	0.111	0.549	0.254	0.732	0.925	0.34	0.033	0.027	0.52	0.002	0.007	0.311	0.026	0.013	0
170	450	170	0.178	0.048	0.707	0.175	0.14	0.061	0.045	0.569	0.167	0.256	0.113	0.512	0.529	0.87	0.058	0.362	0.783	0.243	0.133	0.332	0.018	0.021	0.067	0.028	0.016	0.095	0.686	0.717	0.479	0.613	0.503	0.134	0.104	0.545	0.242	0.738	0.82	0.327	0.039	0.023	0.372	0.001	0.007	0.278	0.018	0	0
190	450	170	0.13	0.023	0.472	0.165	0.101	0.082	0.041	0.329	0.11	0.181	0.092	0.418	0.428	0.683	0.048	0.335	0.605	0.147	0.124	0.286	0.01	0.01	0.058	0.053	0.015	0.105	0.601	0.623	0.421	0.569	0.498	0.135	0.088	0.552	0.236	0.664	0.543	0.279	0.018	0.027	0.204	0.003	0.032	0.207	0.026	0.002	0
210	450	170	0.123	0.027	0.241	0.199	0.175	0.056	0.074	0.139	0.182	0.219	0.141	0.381	0.401	0.562	0.105	0.28	0.367	0.126	0.111	0.244	0.002	0.058	0.056	0.089	0.064	0.099	0.505	0.568	0.341	0.507	0.388	0.062	0.076	0.441	0.257	0.543	0.403	0.25	0.008	0.036	0.154	0.016	0.013	0.209	0.034	0.006	0
230	450	170	0.118	0.03	0.187	0.198	0.193	0.055	0.06	0.104	0.148	0.228	0.166	0.351	0.405	0.421	0.17	0.225	0.36	0.117	0.093	0.206	0.002	0.101	0.055	0.101	0.07	0.096	0.421	0.392	0.271	0.448	0.347	0.041	0.072	0.375	0.223	0.444	0.331	0.218	0.008	0.039	0.145	0.015	0.006	0.211	0.031	0	0
250	450	170	0.099	0.039	0.192	0.112	0.154	0.046	0.057	0.094	0.223	0.118	0.096	0.292	0.425	0.364	0.074	0.182	0.243	0.099	0.077	0.173	0.002	0.018	0.048	0.032	0.03	0.081	0.327	0.296	0.22	0.38	0.254	0.019	0.054	0.324	0.143	0.355	0.311	0.18	0.004	0.029	0.202	0.003	0.003	0.165	0.018	0.001	0
270	450	170	0.072	0.041	0.189	0.083	0.136	0.054	0.037	0.103	0.236	0.086	0.082	0.248	0.407	0.379	0.035	0.133	0.215	0.094	0.063	0.149	0.002	0.007	0.035	0.026	0.018	0.072	0.238	0.237	0.158	0.291	0.189	0.011	0.04	0.276	0.106	0.278	0.301	0.153	0.005	0.026	0.21	0.002	0.004	0.111	0.012	0	0
290	450	170	0.054	0.037	0.121	0.062	0.124	0.038	0.016	0.053	0.171	0.057	0.063	0.133	0.269	0.278	0.026	0.133	0.149	0.124	0.058	0.139	0.002	0.005	0.031	0.027	0.025	0.081	0.179	0.198	0.119	0.231	0.151	0.005	0.034	0.239	0.101	0.229	0.25	0.141	0.006	0.022	0.117	0.001	0.02	0.041	0.026	0	0
310	450	170	0.043	0.03	0.051	0.047	0.122	0.027	0.005	0.041	0.052	0.043	0.048	0.059	0.159	0.208	0.018	0.116	0.12	0.129	0.049	0.138	0.002	0.006	0.024	0.03	0.025	0.079	0.141	0.161	0.091	0.189	0.13	0.004	0.033	0.206	0.087	0.175	0.233	0.121	0.003	0.013	0.038	0.001	0.002	0.013	0.033	0	0
90	450	190	0.375	0.215	0.754	0.283	0.333	0.06	0.019	0.513	0.82	0.228	0.065	0.855	0.852	0.543	0.048	0.349	0.811	0.68	0.134	0.337	0.022	0.054	0.069	0.013	0.136	0.174	0.774	0.783	0.753	0.681	0.541	0.706	0.118	0.599	0.265	0.628	0.72	0.329	0.052	0.048	0.81	0.002	0.017	0.469	0.019	0	0
110	450	190	0.331	0.115	0.996	0.23	0.245	0.069	0.036	0.582	0.551	0.213	0.065	0.806	0.824	0.819	0.046	0.351	0.946	0.229	0.138	0.336	0.02	0.026	0.079	0.025	0.049	0.145	0.739	0.797	0.557	0.667	0.556	0.696	0.119	0.612	0.263	0.648	0.84	0.314	0.039	0.032	0.801	0.001	0.011	0.338	0.017	0	0
130	450	190	0.28	0.086	0.875	0.224	0.232	0.086	0.06	0.532	0.404	0.244	0.083	0.66	0.66	0.894	0.062	0.354	0.858	0.243	0.134	0.329	0.017	0.027	0.083	0.029	0.048	0.137	0.697	0.774	0.484	0.663	0.561	0.288	0.107	0.559	0.251	0.676	0.913	0.311	0.04	0.027	0.601	0.002	0.019	0.298	0.024	0	0
150	450	190	0.22	0.064	0.727	0.194	0.166	0.067	0.05	0.57	0.229	0.254	0.109	0.538	0.607	0.856	0.06	0.361	0.73	0.182	0.13	0.325	0.02	0.031	0.068	0.021	0.03	0.121	0.671	0.68	0.473	0.666	0.472	0.194	0.105	0.545	0.24	0.703	0.92	0.315	0.049	0.022	0.422	0.002	0.008	0.289	0.028	0	0
170	450	190	0.169	0.031	0.629	0.17	0.115	0.087	0.075	0.495	0.089	0.2	0.102	0.457	0.439	0.614	0.048	0.325	0.629	0.297	0.123	0.297	0.014	0.006	0.056	0.023	0.009	0.088	0.604	0.628	0.425	0.558	0.445	0.228	0.101	0.519	0.225	0.678	0.653	0.27	0.044	0.025	0.259	0.002	0.003	0.176	0.03	0.007	0
190	450	190	0.145	0.023	0.195	0.133	0.11	0.082	0.13	0.106	0.124	0.135	0.081	0.336	0.366	0.317	0.032	0.281	0.234	0.121	0.108	0.232	0.004	0.004	0.046	0.025	0.012	0.089	0.514	0.548	0.359	0.513	0.367	0.102	0.075	0.466	0.203	0.61	0.4	0.229	0.002	0.028	0.114	0.002	0.018	0.131	0.031	0.018	0
210	450	190	0.111	0.027	0.134	0.129	0.112	0.044	0.126	0.066	0.207	0.131	0.094	0.312	0.383	0.23	0.044	0.234	0.185	0.099	0.092	0.199	0.002	0.009	0.038	0.029	0.034	0.076	0.419	0.457	0.285	0.434	0.304	0.074	0.066	0.405	0.176	0.458	0.317	0.199	0.001	0.026	0.134	0.005	0.006	0.125	0.027	0.016	0
230	450	190	0.09	0.031	0.138	0.126	0.129	0.044	0.112	0.088	0.215	0.132	0.103	0.29	0.343	0.272	0.065	0.193	0.226	0.088	0.076	0.172	0.002	0.013	0.04	0.033	0.048	0.075	0.34	0.299	0.224	0.369	0.251	0.03	0.055	0.331	0.142	0.364	0.28	0.169	0.003	0.027	0.13	0.005	0.004	0.142	0.025	0.003	0
250	450	190	0.079	0.034	0.171	0.095	0.119	0.062	0.105	0.136	0.165	0.1	0.076	0.268	0.325	0.393	0.056	0.16	0.274	0.081	0.064	0.153	0.002	0.007	0.036	0.024	0.029	0.068	0.272	0.252	0.172	0.317	0.204	0.022	0.043	0.283	0.113	0.3	0.285	0.149	0.007	0.026	0.149	0.002	0.004	0.128	0.018	0	0
270	450	190	0.063	0.029	0.19	0.082	0.102	0.07	0.073	0.156	0.15	0.084	0.074	0.236	0.355	0.459	0.036	0.127	0.282	0.092	0.057	0.16	0.003	0.008	0.032	0.025	0.024	0.062	0.217	0.224	0.138	0.272	0.171	0.014	0.037	0.252	0.1	0.258	0.302	0.142	0.01	0.03	0.17	0.002	0.004	0.097	0.015	0	0
290	450	190	0.051	0.026	0.175	0.084	0.108	0.058	0.056	0.102	0.14	0.066	0.069	0.199	0.354	0.657	0.028	0.115	0.31	0.115	0.061	0.317	0.002	0.023	0.029	0.022	0.057	0.065	0.196	0.218	0.123	0.253	0.159	0.008	0.034	0.255	0.112	0.253	0.402	0.201	0.015	0.025	0.158	0.002	0.02	0.053	0.012	0	0
310	450	190	0.041	0.025	0.137	0.076	0.114	0.093	0.056	0.115	0.087	0.057	0.068	0.156	0.308	0.552	0.021	0.102	0.353	0.118	0.056	0.314	0.002	0.015	0.027	0.023	0.074	0.064	0.171	0.195	0.108	0.234	0.153	0.005	0.032	0.24	0.099	0.224	0.437	0.157	0.011	0.016	0.107	0.001	0.013	0.048	0.01	0	0
70	450	210	0.48	0.259	0.701	0.206	0.319	0.05	0.027	0.429	0.724	0.166	0.065	0.756	0.799	0.469	0.037	0.301	0.691	0.554	0.111	0.31	0.022	0.074	0.06	0.01	0.121	0.125	0.662	0.608	0.611	0.606	0.487	0.456	0.116	0.446	0.245	0.571	0.627	0.31	0.113	0.033	0.802	0.001	0.006	0.425	0.016	0	0
90	450	210	0.361	0.173	0.821	0.243	0.389	0.063	0.026	0.551	0.631	0.173	0.057	0.79	0.766	0.693	0.036	0.325	0.859	0.4	0.123	0.345	0.021	0.04	0.06	0.011	0.059	0.101	0.688	0.694	0.543	0.633	0.531	0.536	0.113	0.522	0.266	0.612	0.799	0.29	0.09	0.034	0.848	0.001	0.011	0.362	0.017	0	0
110	450	210	0.31	0.104	0.861	0.245	0.326	0.08	0.05	0.555	0.391	0.196	0.063	0.693	0.664	0.827	0.053	0.331	0.819	0.296	0.126	0.325	0.022	0.018	0.066	0.023	0.047	0.121	0.653	0.738	0.475	0.617	0.53	0.294	0.106	0.536	0.249	0.625	0.875	0.293	0.061	0.031	0.672	0.002	0.005	0.313	0.021	0.008	0
130	450	210	0.261	0.075	0.74	0.204	0.193	0.068	0.077	0.614	0.275	0.225	0.085	0.527	0.53	0.819	0.064	0.339	0.734	0.268	0.127	0.328	0.022	0.023	0.058	0.033	0.035	0.128	0.653	0.711	0.456	0.603	0.527	0.146	0.097	0.545	0.252	0.674	0.967	0.287	0.058	0.035	0.457	0.002	0.042	0.298	0.036	0.05	0
150	450	210	0.193	0.03	0.63	0.165	0.187	0.078	0.049	0.598	0.105	0.197	0.092	0.478	0.498	0.723	0.053	0.317	0.654	0.173	0.12	0.341	0.023	0.024	0.047	0.025	0.013	0.122	0.588	0.626	0.425	0.607	0.462	0.299	0.089	0.506	0.226	0.639	0.824	0.265	0.063	0.026	0.356	0.013	0.007	0.22	0.029	0.001	0
170	450	210	0.156	0.024	0.257	0.156	0.123	0.061	0.271	0.238	0.113	0.135	0.072	0.392	0.339	0.211	0.028	0.281	0.313	0.316	0.109	0.249	0.007	0.003	0.042	0.029	0.01	0.07	0.523	0.563	0.379	0.51	0.413	0.215	0.075	0.477	0.211	0.586	0.438	0.242	0.009	0.025	0.124	0.002	0.039	0.077	0.037	0.031	0.001
190	450	210	0.14	0.023	0.086	0.113	0.115	0.045	0.221	0.066	0.189	0.109	0.071	0.284	0.304	0.135	0.031	0.235	0.18	0.089	0.095	0.199	0.002	0.001	0.036	0.034	0.015	0.066	0.417	0.469	0.282	0.509	0.3	0.081	0.06	0.409	0.176	0.459	0.324	0.195	0.002	0.024	0.07	0.001	0.015	0.049	0.032	0.048	0
210	450	210	0.102	0.023	0.085	0.104	0.094	0.038	0.176	0.058	0.184	0.1	0.078	0.289	0.291	0.182	0.045	0.189	0.201	0.073	0.083	0.168	0.001	0.004	0.042	0.021	0.04	0.063	0.327	0.384	0.216	0.411	0.247	0.066	0.053	0.338	0.14	0.358	0.26	0.164	0.002	0.024	0.077	0.002	0.005	0.062	0.025	0.002	0
230	450	210	0.086	0.028	0.088	0.099	0.098	0.051	0.227	0.079	0.133	0.096	0.083	0.274	0.258	0.254	0.053	0.163	0.23	0.072	0.069	0.153	0.001	0.012	0.036	0.032	0.049	0.062	0.268	0.252	0.173	0.348	0.204	0.026	0.047	0.284	0.117	0.302	0.23	0.14	0.004	0.024	0.082	0.002	0.003	0.087	0.02	0	0
250	450	210	0.073	0.03	0.106	0.094	0.096	0.071	0.203	0.102	0.091	0.087	0.077	0.241	0.254	0.313	0.05	0.144	0.256	0.081	0.061	0.153	0.002	0.006	0.031	0.033	0.041	0.061	0.233	0.235	0.146	0.333	0.18	0.019	0.039	0.256	0.103	0.271	0.243	0.133	0.006	0.028	0.081	0.002	0.004	0.081	0.019	0.001	0
270	450	210	0.057	0.029	0.117	0.078	0.097	0.054	0.107	0.106	0.091	0.07	0.067	0.181	0.274	0.344	0.041	0.12	0.214	0.103	0.053	0.163	0.002	0.006	0.029	0.031	0.036	0.061	0.201	0.217	0.122	0.283	0.158	0.013	0.035	0.235	0.092	0.238	0.243	0.12	0.008	0.027	0.099	0.002	0.025	0.061	0.029	0.001	0
290	450	210	0.049	0.025	0.111	0.094	0.113	0.087	0.102	0.074	0.068	0.061	0.062	0.177	0.264	0.459	0.027	0.114	0.298	0.132	0.057	0.329	0.002	0.017	0.026	0.026	0.091	0.06	0.188	0.219	0.111	0.259	0.146	0.008	0.032	0.234	0.102	0.248	0.389	0.137	0.009	0.027	0.106	0.002	0.035	0.059	0.015	0.001	0
310	450	210	0.044	0.022	0.091	0.085	0.119	0.103	0.103	0.086	0.056	0.058	0.065	0.13	0.186	0.338	0.022	0.096	0.33	0.144	0.052	0.279	0.002	0.011	0.025	0.043	0.07	0.058	0.166	0.19	0.1	0.228	0.149	0.007	0.031	0.222	0.091	0.218	0.34	0.117	0.004	0.016	0.059	0.001	0.024	0.077	0.011	0	0
330	450	210	0.034	0.027	0.033	0.047	0.129	0.045	0.047	0.041	0.035	0.043	0.055	0.046	0.061	0.13	0.01	0.082	0.197	0.166	0.042	0.129	0.002	0.004	0.019	0.023	0.027	0.049	0.124	0.136	0.077	0.177	0.11	0.003	0.027	0.164	0.059	0.142	0.169	0.083	0.001	0.004	0.014	0.001	0.014	0.063	0.008	0	0
70	450	230	0.377	0.173	0.665	0.246	0.248	0.049	0.021	0.362	0.679	0.153	0.053	0.688	0.683	0.614	0.026	0.28	0.667	0.22	0.111	0.3	0.02	0.044	0.047	0.01	0.069	0.151	0.611	0.603	0.511	0.599	0.504	0.265	0.097	0.428	0.22	0.527	0.657	0.228	0.104	0.035	0.901	0.001	0.004	0.359	0.014	0	0
90	450	230	0.321	0.136	0.76	0.21	0.311	0.064	0.067	0.452	0.525	0.171	0.054	0.71	0.652	0.723	0.043	0.322	0.73	0.332	0.121	0.327	0.023	0.029	0.053	0.021	0.054	0.095	0.659	0.653	0.488	0.604	0.537	0.179	0.1	0.483	0.26	0.582	0.779	0.256	0.103	0.036	0.778	0.001	0.006	0.333	0.019	0	0
110	450	230	0.269	0.094	0.66	0.262	0.31	0.064	0.04	0.566	0.365	0.197	0.062	0.631	0.582	0.828	0.055	0.322	0.736	0.278	0.124	0.348	0.024	0.017	0.049	0.034	0.046	0.137	0.677	0.727	0.472	0.599	0.539	0.107	0.104	0.527	0.246	0.61	0.865	0.285	0.055	0.031	0.524	0.002	0.015	0.327	0.027	0	0
130	450	230	0.219	0.039	0.612	0.18	0.163	0.079	0.033	0.679	0.111	0.187	0.072	0.536	0.483	0.953	0.042	0.3	0.739	0.155	0.119	0.346	0.025	0.018	0.057	0.013	0.011	0.1	0.616	0.647	0.403	0.531	0.482	0.185	0.097	0.546	0.231	0.612	0.84	0.259	0.091	0.026	0.353	0.001	0.012	0.27	0.03	0	0.001
150	450	230	0.186	0.024	0.404	0.156	0.166	0.076	0.222	0.504	0.079	0.138	0.065	0.45	0.366	0.253	0.036	0.28	0.469	0.254	0.111	0.268	0.013	0.007	0.038	0.024	0.017	0.101	0.527	0.551	0.375	0.495	0.445	0.359	0.078	0.496	0.213	0.574	0.512	0.23	0.047	0.025	0.209	0.001	0.008	0.103	0.034	0.035	0.004
170	450	230	0.146	0.021	0.087	0.121	0.096	0.048	0.263	0.106	0.177	0.109	0.06	0.303	0.328	0.104	0.026	0.232	0.209	0.113	0.094	0.2	0.003	0.001	0.03	0.029	0.021	0.066	0.425	0.458	0.301	0.519	0.32	0.136	0.059	0.418	0.181	0.464	0.336	0.198	0.001	0.029	0.036	0.001	0.006	0.018	0.046	0.041	0.001
190	450	230	0.115	0.026	0.057	0.101	0.091	0.039	0.263	0.073	0.159	0.094	0.07	0.272	0.254	0.115	0.032	0.181	0.171	0.072	0.143	0.162	0.001	0.001	0.028	0.028	0.048	0.055	0.317	0.389	0.214	0.575	0.246	0.045	0.053	0.336	0.137	0.347	0.265	0.153	0.006	0.021	0.038	0.001	0.005	0.029	0.028	0.004	0
210	450	230	0.086	0.021	0.045	0.108	0.1	0.044	0.346	0.062	0.116	0.102	0.086	0.274	0.232	0.166	0.055	0.158	0.198	0.071	0.103	0.147	0.001	0.004	0.028	0.027	0.083	0.056	0.264	0.338	0.168	0.435	0.21	0.029	0.051	0.283	0.111	0.295	0.218	0.13	0.004	0.021	0.043	0.002	0.003	0.042	0.027	0.003	0.001
230	450	230	0.077	0.022	0.044	0.1	0.091	0.052	0.425	0.054	0.076	0.096	0.082	0.254	0.219	0.197	0.043	0.148	0.206	0.074	0.067	0.139	0.001	0.005	0.028	0.034	0.058	0.057	0.238	0.24	0.144	0.381	0.186	0.024	0.046	0.263	0.103	0.276	0.202	0.125	0.003	0.023	0.04	0.002	0.003	0.047	0.021	0.001	0
250	450	230	0.067	0.022	0.053	0.092	0.093	0.066	0.334	0.057	0.057	0.085	0.098	0.211	0.228	0.235	0.032	0.134	0.224	0.091	0.058	0.15	0.001	0.005	0.028	0.044	0.062	0.058	0.22	0.224	0.13	0.362	0.167	0.014	0.04	0.244	0.099	0.253	0.216	0.121	0.006	0.027	0.044	0.002	0.003	0.048	0.021	0.001	0
270	450	230	0.056	0.024	0.05	0.069	0.108	0.046	0.124	0.054	0.057	0.06	0.071	0.115	0.2	0.2	0.026	0.118	0.135	0.156	0.046	0.125	0.002	0.003	0.025	0.03	0.044	0.053	0.169	0.191	0.106	0.27	0.139	0.01	0.031	0.206	0.087	0.218	0.162	0.093	0.006	0.03	0.037	0.004	0.026	0.034	0.037	0.001	0
290	450	230	0.067	0.025	0.031	0.132	0.138	0.06	0.127	0.035	0.034	0.062	0.065	0.095	0.166	0.212	0.022	0.107	0.2	0.191	0.047	0.159	0.002	0.003	0.022	0.025	0.077	0.057	0.149	0.183	0.087	0.238	0.123	0.007	0.027	0.189	0.093	0.208	0.166	0.087	0.006	0.026	0.023	0.002	0.019	0.048	0.017	0.002	0
310	450	230	0.048	0.023	0.026	0.123	0.123	0.055	0.079	0.031	0.037	0.064	0.093	0.061	0.142	0.271	0.029	0.099	0.242	0.315	0.046	0.183	0.003	0.003	0.021	0.025	0.043	0.051	0.144	0.168	0.087	0.203	0.123	0.007	0.027	0.194	0.078	0.192	0.159	0.087	0.002	0.013	0.007	0.001	0.002	0.072	0.012	0	0
330	450	230	0.032	0.026	0.016	0.049	0.126	0.028	0.036	0.016	0.031	0.044	0.095	0.028	0.064	0.151	0.014	0.092	0.153	0.217	0.042	0.099	0.002	0.002	0.017	0.009	0.027	0.042	0.114	0.131	0.07	0.16	0.102	0.003	0.022	0.146	0.051	0.133	0.116	0.073	0.001	0.003	0.002	0.001	0.001	0.051	0.009	0	0
50	450	250	0.256	0.051	0.304	0.179	0.147	0.017	0.006	0.099	0.17	0.077	0.03	0.269	0.407	0.287	0.013	0.135	0.131	0.186	0.059	0.135	0.006	0.023	0.034	0.008	0.015	0.045	0.314	0.354	0.21	0.307	0.231	0.036	0.047	0.235	0.115	0.257	0.257	0.096	0.017	0.042	0.411	0.003	0.009	0.117	0.013	0	0.005
70	450	250	0.278	0.069	0.578	0.287	0.18	0.044	0.021	0.339	0.599	0.174	0.055	0.692	0.576	0.648	0.023	0.266	0.478	0.193	0.113	0.268	0.025	0.03	0.036	0.017	0.032	0.09	0.629	0.646	0.454	0.582	0.479	0.094	0.08	0.437	0.217	0.501	0.688	0.217	0.084	0.052	0.823	0.001	0.041	0.329	0.013	0.011	0.002
90	450	250	0.259	0.114	0.703	0.184	0.241	0.055	0.056	0.495	0.469	0.189	0.056	0.699	0.593	0.799	0.031	0.295	0.672	0.201	0.125	0.348	0.031	0.03	0.036	0.015	0.035	0.084	0.703	0.671	0.489	0.668	0.529	0.063	0.086	0.515	0.264	0.572	0.957	0.261	0.111	0.032	0.674	0.002	0.03	0.336	0.018	0.011	0
110	450	250	0.236	0.06	0.651	0.207	0.262	0.062	0.019	0.667	0.33	0.19	0.059	0.619	0.576	0.945	0.034	0.291	0.732	0.181	0.118	0.354	0.027	0.014	0.038	0.01	0.011	0.121	0.657	0.694	0.45	0.565	0.487	0.092	0.091	0.513	0.232	0.564	0.972	0.245	0.107	0.025	0.538	0.002	0.013	0.332	0.021	0	0
130	450	250	0.193	0.023	0.553	0.179	0.125	0.088	0.059	0.636	0.07	0.147	0.062	0.544	0.462	0.624	0.039	0.268	0.685	0.218	0.111	0.301	0.017	0.006	0.039	0.013	0.009	0.142	0.57	0.61	0.381	0.494	0.425	0.308	0.092	0.492	0.207	0.55	0.649	0.223	0.06	0.024	0.305	0.001	0.004	0.205	0.028	0.005	0
150	450	250	0.161	0.021	0.191	0.131	0.147	0.051	0.37	0.277	0.126	0.098	0.053	0.374	0.322	0.102	0.022	0.225	0.265	0.263	0.093	0.211	0.007	0.003	0.028	0.024	0.032	0.093	0.45	0.478	0.316	0.512	0.378	0.211	0.062	0.456	0.183	0.495	0.365	0.192	0.015	0.026	0.088	0.001	0.005	0.028	0.049	0.128	0.001
170	450	250	0.126	0.021	0.047	0.101	0.097	0.039	0.24	0.061	0.137	0.087	0.053	0.236	0.316	0.083	0.023	0.184	0.152	0.079	0.111	0.164	0.003	0.001	0.023	0.016	0.033	0.05	0.346	0.385	0.236	0.532	0.267	0.082	0.05	0.363	0.144	0.369	0.268	0.166	0.002	0.03	0.02	0.001	0.007	0.014	0.06	0.055	0.001
190	450	250	0.098	0.019	0.035	0.09	0.095	0.039	0.327	0.063	0.098	0.092	0.064	0.255	0.258	0.106	0.035	0.154	0.169	0.065	0.184	0.141	0.002	0.001	0.024	0.025	0.086	0.052	0.288	0.37	0.188	0.453	0.224	0.036	0.057	0.299	0.119	0.296	0.213	0.133	0.007	0.024	0.03	0.001	0.004	0.014	0.039	0.019	0
210	450	250	0.082	0.018	0.032	0.094	0.095	0.048	0.37	0.052	0.074	0.092	0.071	0.253	0.227	0.138	0.044	0.144	0.177	0.073	0.096	0.128	0.001	0.004	0.026	0.028	0.103	0.056	0.239	0.314	0.147	0.364	0.192	0.028	0.055	0.261	0.103	0.264	0.186	0.117	0.003	0.022	0.036	0.001	0.003	0.026	0.032	0.001	0
230	450	250	0.074	0.018	0.035	0.098	0.094	0.05	0.41	0.052	0.057	0.083	0.062	0.231	0.205	0.184	0.04	0.14	0.175	0.085	0.06	0.123	0.001	0.004	0.027	0.031	0.079	0.053	0.221	0.226	0.126	0.355	0.169	0.025	0.043	0.243	0.095	0.257	0.169	0.112	0.002	0.022	0.035	0.001	0.003	0.039	0.025	0	0
250	450	250	0.06	0.022	0.049	0.091	0.09	0.054	0.302	0.048	0.05	0.07	0.058	0.182	0.216	0.21	0.033	0.13	0.158	0.119	0.049	0.118	0.002	0.003	0.026	0.033	0.077	0.051	0.198	0.207	0.109	0.304	0.149	0.016	0.033	0.224	0.089	0.233	0.156	0.109	0.002	0.025	0.043	0.002	0.004	0.052	0.029	0	0
270	450	250	0.052	0.024	0.038	0.063	0.105	0.036	0.159	0.041	0.054	0.054	0.047	0.096	0.173	0.147	0.021	0.125	0.101	0.169	0.044	0.115	0.002	0.002	0.023	0.026	0.05	0.05	0.167	0.202	0.093	0.258	0.128	0.011	0.029	0.204	0.085	0.216	0.13	0.103	0.005	0.027	0.028	0.005	0.03	0.048	0.039	0	0
290	450	250	0.058	0.024	0.017	0.07	0.136	0.048	0.116	0.019	0.035	0.05	0.045	0.064	0.109	0.113	0.016	0.124	0.143	0.233	0.04	0.114	0.004	0.002	0.02	0.015	0.069	0.044	0.139	0.169	0.083	0.228	0.115	0.008	0.029	0.192	0.094	0.186	0.121	0.084	0.007	0.025	0.006	0.001	0.003	0.072	0.02	0	0
310	450	250	0.043	0.028	0.016	0.063	0.124	0.043	0.05	0.014	0.036	0.047	0.049	0.048	0.091	0.11	0.015	0.126	0.164	0.28	0.038	0.112	0.005	0.002	0.018	0.012	0.054	0.041	0.121	0.147	0.073	0.173	0.107	0.006	0.026	0.168	0.069	0.158	0.113	0.074	0.003	0.009	0.004	0.001	0.002	0.08	0.018	0	0
330	450	250	0.03	0.035	0.014	0.044	0.124	0.033	0.017	0.011	0.026	0.042	0.07	0.031	0.054	0.093	0.006	0.133	0.13	0.288	0.038	0.088	0.003	0.002	0.015	0.004	0.038	0.039	0.105	0.126	0.061	0.15	0.094	0.003	0.02	0.136	0.051	0.131	0.105	0.071	0.001	0.002	0.002	0.002	0.001	0.067	0.013	0	0
50	450	270	0.189	0.043	0.273	0.148	0.092	0.015	0.002	0.084	0.162	0.056	0.024	0.268	0.336	0.268	0.014	0.123	0.091	0.139	0.051	0.116	0.004	0.009	0.017	0.004	0.006	0.06	0.277	0.353	0.206	0.279	0.219	0.01	0.042	0.245	0.111	0.234	0.231	0.091	0.019	0.027	0.388	0.001	0.019	0.068	0.016	0.001	0.002
70	450	270	0.214	0.039	0.56	0.19	0.165	0.036	0.003	0.277	0.526	0.145	0.055	0.638	0.492	0.731	0.022	0.226	0.426	0.172	0.102	0.262	0.034	0.04	0.028	0.006	0.008	0.045	0.562	0.616	0.414	0.486	0.42	0.085	0.075	0.432	0.191	0.481	0.629	0.206	0.071	0.031	0.771	0.002	0.039	0.335	0.034	0.005	0.005
90	450	270	0.22	0.059	0.639	0.155	0.305	0.056	0.015	0.472	0.435	0.157	0.051	0.669	0.573	0.841	0.031	0.251	0.659	0.149	0.109	0.321	0.043	0.019	0.028	0.007	0.007	0.068	0.615	0.602	0.429	0.506	0.446	0.048	0.084	0.492	0.215	0.512	0.803	0.231	0.13	0.018	0.624	0.001	0.005	0.355	0.022	0.001	0
110	450	270	0.209	0.037	0.616	0.181	0.283	0.081	0.033	0.648	0.202	0.148	0.05	0.591	0.488	0.795	0.035	0.242	0.69	0.156	0.102	0.334	0.028	0.011	0.029	0.009	0.008	0.101	0.56	0.583	0.381	0.458	0.395	0.112	0.091	0.472	0.191	0.499	0.74	0.213	0.127	0.019	0.509	0.001	0.003	0.288	0.02	0	0.002
130	450	270	0.178	0.021	0.454	0.178	0.121	0.071	0.112	0.614	0.059	0.108	0.046	0.507	0.394	0.285	0.034	0.23	0.573	0.376	0.096	0.268	0.014	0.002	0.032	0.026	0.009	0.149	0.504	0.535	0.331	0.442	0.387	0.505	0.078	0.47	0.18	0.495	0.456	0.207	0.07	0.021	0.277	0.001	0.012	0.107	0.03	0.129	0
150	450	270	0.143	0.022	0.083	0.105	0.105	0.036	0.284	0.153	0.135	0.082	0.045	0.294	0.317	0.079	0.019	0.173	0.172	0.205	0.074	0.17	0.003	0.001	0.032	0.027	0.02	0.055	0.375	0.381	0.256	0.493	0.316	0.124	0.05	0.386	0.147	0.386	0.288	0.159	0.003	0.023	0.042	0.001	0.003	0.011	0.059	0.178	0.001
170	450	270	0.114	0.018	0.035	0.084	0.079	0.033	0.213	0.038	0.059	0.086	0.053	0.199	0.347	0.086	0.026	0.156	0.119	0.07	0.07	0.141	0.002	0.001	0.021	0.029	0.024	0.05	0.303	0.323	0.198	0.399	0.246	0.076	0.042	0.316	0.118	0.309	0.209	0.136	0.001	0.023	0.02	0.001	0.005	0.012	0.069	0.035	0.001
190	450	270	0.095	0.018	0.021	0.098	0.098	0.045	0.357	0.028	0.03	0.118	0.065	0.21	0.269	0.112	0.063	0.137	0.111	0.081	0.076	0.123	0.001	0.01	0.022	0.041	0.1	0.05	0.273	0.336	0.155	0.32	0.209	0.036	0.045	0.263	0.103	0.255	0.181	0.118	0.003	0.026	0.024	0.002	0.003	0.007	0.058	0.001	0.001
210	450	270	0.083	0.019	0.024	0.099	0.097	0.073	0.296	0.032	0.04	0.094	0.068	0.224	0.236	0.126	0.05	0.122	0.143	0.086	0.069	0.113	0.001	0.008	0.023	0.033	0.097	0.048	0.218	0.279	0.128	0.281	0.179	0.025	0.041	0.235	0.092	0.234	0.159	0.108	0.006	0.019	0.029	0.001	0.003	0.021	0.036	0.003	0
230	450	270	0.066	0.019	0.045	0.077	0.086	0.045	0.257	0.05	0.037	0.07	0.051	0.18	0.211	0.125	0.03	0.118	0.151	0.11	0.053	0.111	0.001	0.003	0.022	0.022	0.052	0.047	0.195	0.192	0.109	0.258	0.154	0.022	0.033	0.219	0.084	0.221	0.147	0.105	0.004	0.031	0.039	0.001	0.005	0.031	0.025	0.001	0
250	450	270	0.054	0.02	0.057	0.066	0.093	0.03	0.169	0.051	0.044	0.055	0.044	0.132	0.186	0.122	0.022	0.114	0.115	0.146	0.043	0.114	0.002	0.002	0.021	0.017	0.042	0.043	0.165	0.182	0.091	0.251	0.13	0.012	0.026	0.195	0.078	0.201	0.13	0.107	0.003	0.027	0.049	0.002	0.004	0.04	0.033	0.001	0
270	450	270	0.047	0.023	0.03	0.054	0.105	0.023	0.147	0.036	0.044	0.049	0.041	0.081	0.126	0.097	0.015	0.128	0.101	0.188	0.04	0.109	0.001	0.002	0.017	0.018	0.045	0.043	0.139	0.167	0.076	0.218	0.117	0.007	0.023	0.184	0.081	0.183	0.12	0.09	0.004	0.021	0.02	0.002	0.002	0.056	0.022	0.001	0
290	450	270	0.039	0.027	0.016	0.047	0.117	0.024	0.085	0.016	0.024	0.045	0.039	0.047	0.089	0.092	0.015	0.13	0.113	0.282	0.039	0.11	0.001	0.002	0.018	0.011	0.051	0.04	0.128	0.158	0.072	0.182	0.111	0.008	0.023	0.178	0.093	0.171	0.112	0.08	0.003	0.017	0.005	0.001	0.001	0.07	0.021	0	0
310	450	270	0.031	0.034	0.013	0.038	0.119	0.017	0.049	0.01	0.013	0.041	0.039	0.027	0.079	0.089	0.013	0.094	0.115	0.291	0.036	0.102	0.001	0.001	0.016	0.008	0.035	0.034	0.11	0.137	0.063	0.158	0.097	0.005	0.02	0.155	0.065	0.135	0.098	0.068	0	0.007	0.003	0.001	0.002	0.044	0.013	0	0
330	450	270	0.026	0.03	0.011	0.035	0.12	0.013	0.015	0.007	0.009	0.037	0.05	0.018	0.044	0.079	0.005	0.11	0.127	0.28	0.034	0.078	0.001	0.001	0.013	0.002	0.027	0.033	0.093	0.109	0.053	0.137	0.083	0.002	0.017	0.126	0.047	0.114	0.089	0.062	0	0.001	0.002	0.003	0	0.044	0.008	0	0
350	450	270	0.018	0.019	0.009	0.025	0.092	0.01	0.008	0.004	0.006	0.023	0.01	0.013	0.001	0.029	0	0.118	0.074	0.223	0.032	0.05	0.001	0.001	0.005	0.002	0.02	0.024	0.067	0.08	0.04	0.105	0.062	0.001	0.014	0.083	0.034	0.086	0.069	0.052	0	0	0.002	0.002	0.009	0.037	0.006	0	0
50	450	290	0.108	0.03	0.164	0.141	0.071	0.012	0.002	0.051	0.1	0.036	0.015	0.201	0.222	0.105	0.013	0.084	0.059	0.094	0.041	0.081	0.002	0.004	0.025	0.004	0.008	0.064	0.207	0.238	0.148	0.214	0.157	0.003	0.038	0.191	0.083	0.161	0.141	0.064	0.027	0.021	0.332	0.004	0.022	0.016	0.013	0.001	0
70	450	290	0.155	0.032	0.369	0.111	0.127	0.027	0.004	0.196	0.284	0.084	0.041	0.402	0.282	0.341	0.02	0.156	0.236	0.131	0.073	0.195	0.012	0.025	0.019	0.007	0.007	0.047	0.353	0.387	0.303	0.32	0.259	0.064	0.061	0.315	0.129	0.301	0.287	0.127	0.086	0.046	0.662	0.003	0.055	0.165	0.023	0.005	0.006
90	450	290	0.188	0.037	0.5	0.103	0.266	0.048	0.009	0.344	0.264	0.111	0.041	0.548	0.499	0.37	0.031	0.196	0.542	0.233	0.086	0.216	0.026	0.018	0.018	0.006	0.007	0.115	0.427	0.395	0.336	0.361	0.314	0.304	0.064	0.401	0.148	0.362	0.376	0.181	0.121	0.016	0.562	0.001	0.012	0.181	0.015	0.004	0
110	450	290	0.196	0.037	0.502	0.171	0.322	0.064	0.01	0.618	0.11	0.114	0.044	0.574	0.455	0.39	0.033	0.22	0.655	0.195	0.084	0.254	0.02	0.012	0.021	0.009	0.007	0.194	0.444	0.429	0.307	0.366	0.321	0.642	0.073	0.419	0.146	0.399	0.367	0.184	0.145	0.017	0.519	0.001	0.012	0.152	0.02	0.001	0
130	450	290	0.171	0.019	0.39	0.143	0.135	0.04	0.117	0.566	0.057	0.083	0.039	0.478	0.471	0.114	0.031	0.203	0.522	0.348	0.08	0.212	0.007	0.003	0.024	0.033	0.008	0.229	0.408	0.423	0.288	0.392	0.339	0.763	0.061	0.423	0.146	0.426	0.305	0.18	0.107	0.023	0.288	0.001	0.002	0.044	0.035	0.071	0
150	450	290	0.13	0.02	0.048	0.084	0.108	0.03	0.218	0.1	0.079	0.062	0.035	0.26	0.456	0.06	0.016	0.153	0.133	0.089	0.062	0.143	0.002	0.001	0.018	0.061	0.013	0.051	0.31	0.302	0.216	0.453	0.278	0.135	0.043	0.339	0.125	0.329	0.261	0.151	0.002	0.022	0.023	0.002	0.004	0.002	0.072	0.025	0
170	450	290	0.091	0.017	0.025	0.073	0.066	0.029	0.199	0.024	0.047	0.073	0.043	0.189	0.409	0.068	0.019	0.136	0.102	0.073	0.055	0.13	0.001	0.001	0.022	0.058	0.015	0.045	0.262	0.295	0.177	0.343	0.24	0.075	0.036	0.284	0.107	0.277	0.211	0.128	0.001	0.018	0.014	0.001	0.004	0.001	0.077	0.004	0.001
190	450	290	0.084	0.018	0.018	0.084	0.069	0.034	0.246	0.016	0.033	0.082	0.048	0.174	0.32	0.084	0.036	0.119	0.085	0.089	0.049	0.112	0.001	0.005	0.024	0.065	0.047	0.044	0.231	0.309	0.143	0.302	0.204	0.027	0.038	0.242	0.094	0.242	0.162	0.107	0.001	0.019	0.01	0.002	0.003	0.003	0.047	0.001	0
210	450	290	0.063	0.016	0.018	0.073	0.072	0.036	0.186	0.019	0.031	0.073	0.045	0.149	0.263	0.094	0.04	0.102	0.081	0.099	0.046	0.1	0.001	0.004	0.018	0.036	0.045	0.04	0.19	0.244	0.112	0.25	0.164	0.018	0.032	0.205	0.08	0.204	0.132	0.093	0.002	0.021	0.01	0.002	0.002	0.007	0.038	0.002	0
230	450	290	0.054	0.02	0.026	0.062	0.071	0.027	0.157	0.03	0.032	0.056	0.042	0.142	0.183	0.102	0.022	0.098	0.089	0.12	0.044	0.118	0.001	0.002	0.017	0.016	0.034	0.039	0.159	0.156	0.092	0.215	0.14	0.014	0.025	0.192	0.074	0.188	0.135	0.12	0.002	0.018	0.023	0.001	0.002	0.023	0.028	0.001	0
250	450	290	0.044	0.03	0.037	0.065	0.076	0.022	0.129	0.03	0.049	0.056	0.046	0.135	0.149	0.121	0.019	0.1	0.096	0.15	0.041	0.142	0.001	0.002	0.016	0.011	0.062	0.039	0.143	0.156	0.079	0.209	0.123	0.01	0.024	0.181	0.072	0.18	0.149	0.159	0.001	0.019	0.043	0.001	0.001	0.036	0.019	0.002	0
270	450	290	0.036	0.033	0.019	0.057	0.09	0.02	0.099	0.022	0.044	0.048	0.039	0.082	0.103	0.096	0.016	0.13	0.096	0.194	0.038	0.119	0.001	0.001	0.017	0.015	0.061	0.036	0.129	0.152	0.069	0.189	0.11	0.008	0.022	0.174	0.072	0.171	0.124	0.109	0.004	0.016	0.017	0.001	0.001	0.044	0.02	0.001	0
290	450	290	0.03	0.032	0.013	0.046	0.106	0.02	0.056	0.01	0.025	0.042	0.036	0.037	0.08	0.086	0.013	0.153	0.084	0.371	0.038	0.096	0.001	0.001	0.016	0.009	0.042	0.036	0.124	0.151	0.064	0.174	0.11	0.005	0.024	0.175	0.093	0.17	0.112	0.086	0.003	0.015	0.003	0.001	0.001	0.033	0.015	0	0
310	450	290	0.026	0.029	0.012	0.037	0.115	0.015	0.043	0.006	0.01	0.037	0.033	0.023	0.068	0.073	0.011	0.124	0.078	0.393	0.033	0.084	0.001	0.001	0.013	0.006	0.028	0.03	0.106	0.126	0.056	0.145	0.096	0.003	0.02	0.151	0.063	0.135	0.092	0.067	0	0.006	0.002	0.001	0.001	0.024	0.01	0	0
330	450	290	0.023	0.019	0.009	0.029	0.117	0.009	0.014	0.004	0.006	0.033	0.031	0.015	0.034	0.064	0.003	0.116	0.065	0.278	0.029	0.061	0.001	0.001	0.012	0.002	0.023	0.027	0.08	0.093	0.044	0.125	0.076	0.002	0.015	0.108	0.043	0.093	0.076	0.054	0.001	0.001	0.002	0.001	0.001	0.024	0.007	0	0
350	450	290	0.017	0.015	0.007	0.024	0.093	0.008	0.008	0.003	0.005	0.022	0.004	0.012	0	0.029	0	0.09	0.046	0.203	0.028	0.053	0.001	0.001	0.004	0.001	0.02	0.025	0.063	0.079	0.035	0.101	0.061	0.001	0.013	0.078	0.034	0.083	0.062	0.048	0	0	0.002	0.001	0.022	0.019	0.007	0	0
170	470	110	0.083	0.108	0.489	0.092	0.081	0.031	0.003	0.08	0.306	0.102	0.089	0.385	0.805	0.578	0.039	0.174	0.241	0.1	0.081	0.203	0.006	0.009	0.064	0.016	0.008	0.079	0.408	0.376	0.248	0.359	0.242	0.04	0.066	0.35	0.154	0.382	0.48	0.21	0.02	0.012	0.473	0.002	0.025	0.166	0.008	0.062	0.001
190	470	110	0.079	0.093	0.51	0.105	0.082	0.041	0.005	0.084	0.187	0.102	0.096	0.364	0.745	0.504	0.041	0.16	0.342	0.137	0.081	0.206	0.013	0.011	0.055	0.014	0.007	0.061	0.392	0.364	0.257	0.385	0.257	0.063	0.07	0.355	0.149	0.391	0.415	0.212	0.026	0.021	0.494	0.002	0.007	0.168	0.01	0.02	0.001
210	470	110	0.06	0.066	0.458	0.117	0.093	0.046	0.004	0.058	0.148	0.092	0.089	0.331	0.62	0.448	0.045	0.167	0.372	0.126	0.078	0.184	0.004	0.015	0.055	0.014	0.007	0.067	0.362	0.396	0.252	0.37	0.253	0.136	0.066	0.368	0.149	0.384	0.317	0.195	0.023	0.018	0.405	0.002	0.003	0.097	0.004	0.006	0
230	470	110	0.046	0.051	0.296	0.074	0.085	0.028	0.004	0.02	0.195	0.086	0.072	0.284	0.467	0.502	0.026	0.128	0.165	0.104	0.061	0.149	0.001	0.002	0.052	0.011	0.006	0.054	0.275	0.338	0.177	0.316	0.193	0.032	0.046	0.28	0.117	0.311	0.267	0.15	0.007	0.008	0.315	0.001	0.001	0.085	0.003	0.014	0
250	470	110	0.034	0.041	0.22	0.044	0.086	0.019	0.002	0.02	0.131	0.055	0.051	0.191	0.318	0.342	0.022	0.082	0.05	0.071	0.043	0.104	0.001	0.001	0.036	0.009	0.005	0.043	0.176	0.193	0.112	0.235	0.122	0.005	0.029	0.19	0.069	0.2	0.192	0.098	0.007	0.005	0.197	0.001	0.001	0.049	0.002	0	0
150	470	130	0.175	0.145	0.546	0.141	0.183	0.056	0.02	0.176	0.582	0.197	0.106	0.559	0.892	0.59	0.043	0.293	0.446	0.17	0.118	0.268	0.015	0.027	0.067	0.024	0.025	0.115	0.592	0.582	0.411	0.556	0.366	0.085	0.097	0.458	0.215	0.588	0.643	0.331	0.02	0.044	0.825	0.003	0.026	0.252	0.016	0.044	0.001
170	470	130	0.128	0.17	0.718	0.155	0.132	0.054	0.021	0.217	0.345	0.223	0.136	0.52	0.965	0.641	0.046	0.309	0.561	0.17	0.13	0.349	0.022	0.032	0.081	0.02	0.012	0.109	0.645	0.562	0.426	0.596	0.404	0.086	0.098	0.514	0.231	0.68	0.702	0.321	0.021	0.034	0.725	0.002	0.052	0.245	0.013	0.008	0.001
190	470	130	0.099	0.081	0.793	0.157	0.135	0.09	0.009	0.29	0.252	0.193	0.132	0.464	0.837	0.561	0.06	0.304	0.714	0.259	0.128	0.3	0.02	0.03	0.082	0.02	0.009	0.109	0.62	0.556	0.427	0.567	0.421	0.265	0.102	0.534	0.229	0.685	0.569	0.304	0.041	0.032	0.547	0.002	0.008	0.206	0.017	0.001	0
210	470	130	0.088	0.052	0.519	0.142	0.153	0.062	0.011	0.118	0.305	0.136	0.102	0.424	0.663	0.842	0.043	0.263	0.472	0.25	0.118	0.244	0.005	0.036	0.082	0.02	0.01	0.099	0.537	0.527	0.372	0.578	0.397	0.204	0.087	0.512	0.22	0.598	0.484	0.287	0.019	0.029	0.392	0.002	0.005	0.185	0.013	0	0
230	470	130	0.078	0.076	0.332	0.106	0.194	0.043	0.01	0.046	0.286	0.117	0.098	0.36	0.578	0.535	0.034	0.194	0.138	0.145	0.093	0.2	0.001	0.014	0.074	0.016	0.011	0.081	0.415	0.37	0.265	0.492	0.297	0.03	0.063	0.412	0.176	0.465	0.383	0.227	0.003	0.021	0.38	0.002	0.003	0.137	0.01	0	0
250	470	130	0.067	0.07	0.193	0.076	0.273	0.032	0.005	0.024	0.295	0.086	0.081	0.271	0.426	0.319	0.03	0.132	0.074	0.106	0.066	0.147	0.001	0.002	0.055	0.011	0.009	0.07	0.289	0.24	0.183	0.37	0.198	0.009	0.044	0.291	0.12	0.305	0.257	0.157	0.001	0.016	0.274	0.001	0.002	0.097	0.008	0	0
270	470	130	0.051	0.047	0.125	0.058	0.239	0.021	0.003	0.02	0.146	0.061	0.053	0.148	0.295	0.198	0.033	0.112	0.074	0.093	0.051	0.127	0.001	0.002	0.04	0.017	0.011	0.078	0.184	0.175	0.116	0.209	0.143	0.005	0.036	0.185	0.078	0.193	0.175	0.119	0.002	0.008	0.12	0.001	0.002	0.038	0.008	0	0
110	470	150	0.363	0.13	0.579	0.148	0.204	0.045	0.01	0.166	0.615	0.155	0.068	0.674	0.93	0.467	0.047	0.29	0.596	0.223	0.12	0.284	0.014	0.018	0.094	0.035	0.086	0.158	0.619	0.614	0.607	0.607	0.448	0.382	0.097	0.444	0.232	0.553	0.571	0.328	0.012	0.031	0.784	0.002	0.005	0.325	0.009	0.002	0
130	470	150	0.208	0.109	0.705	0.174	0.23	0.059	0.027	0.27	0.699	0.209	0.087	0.706	0.853	0.608	0.045	0.333	0.696	0.218	0.129	0.298	0.013	0.025	0.079	0.024	0.047	0.088	0.66	0.731	0.489	0.667	0.468	0.278	0.118	0.49	0.242	0.628	0.695	0.287	0.013	0.038	0.877	0.002	0.014	0.296	0.012	0	0
150	470	150	0.163	0.101	0.674	0.181	0.218	0.066	0.067	0.355	0.475	0.27	0.114	0.571	0.809	0.722	0.047	0.371	0.651	0.213	0.14	0.31	0.017	0.07	0.083	0.025	0.04	0.092	0.711	0.654	0.494	0.668	0.487	0.149	0.106	0.534	0.256	0.726	0.779	0.331	0.02	0.032	0.754	0.002	0.009	0.284	0.015	0.014	0
170	470	150	0.13	0.062	0.622	0.165	0.142	0.067	0.026	0.416	0.254	0.265	0.118	0.509	0.701	0.796	0.049	0.365	0.726	0.175	0.139	0.328	0.025	0.041	0.08	0.019	0.012	0.13	0.704	0.627	0.485	0.635	0.473	0.233	0.108	0.56	0.252	0.76	0.846	0.324	0.024	0.034	0.57	0.002	0.023	0.261	0.013	0	0
190	470	150	0.104	0.044	0.614	0.167	0.137	0.096	0.021	0.356	0.212	0.189	0.106	0.434	0.546	0.606	0.054	0.343	0.736	0.436	0.133	0.309	0.016	0.02	0.09	0.02	0.011	0.118	0.644	0.597	0.442	0.637	0.485	0.307	0.103	0.548	0.238	0.742	0.599	0.302	0.035	0.037	0.366	0.002	0.006	0.191	0.014	0.003	0
210	470	150	0.1	0.031	0.372	0.167	0.161	0.061	0.032	0.117	0.294	0.143	0.093	0.36	0.549	0.632	0.037	0.284	0.319	0.142	0.115	0.244	0.003	0.02	0.079	0.025	0.013	0.091	0.533	0.539	0.365	0.626	0.39	0.127	0.077	0.487	0.235	0.602	0.42	0.27	0.004	0.031	0.278	0.002	0.017	0.183	0.021	0.007	0
230	470	150	0.088	0.043	0.325	0.125	0.189	0.046	0.036	0.053	0.312	0.121	0.096	0.332	0.558	0.357	0.04	0.22	0.145	0.129	0.094	0.199	0.001	0.018	0.063	0.019	0.016	0.088	0.421	0.374	0.287	0.47	0.308	0.031	0.063	0.413	0.203	0.474	0.349	0.235	0.003	0.026	0.258	0.002	0.005	0.162	0.016	0	0
250	470	150	0.076	0.066	0.186	0.083	0.269	0.035	0.01	0.022	0.326	0.09	0.087	0.277	0.427	0.179	0.028	0.159	0.076	0.103	0.074	0.157	0.001	0.006	0.048	0.012	0.01	0.072	0.306	0.272	0.199	0.336	0.23	0.009	0.046	0.313	0.138	0.356	0.254	0.169	0.001	0.016	0.23	0.001	0.006	0.119	0.01	0.001	0
270	470	150	0.066	0.062	0.105	0.063	0.196	0.026	0.009	0.019	0.184	0.066	0.065	0.146	0.301	0.14	0.03	0.135	0.074	0.101	0.061	0.116	0.001	0.004	0.037	0.022	0.01	0.068	0.201	0.194	0.128	0.244	0.163	0.005	0.037	0.21	0.091	0.226	0.181	0.124	0.002	0.014	0.127	0.001	0.002	0.072	0.014	0	0
290	470	150	0.057	0.039	0.024	0.046	0.162	0.019	0.003	0.014	0.031	0.051	0.043	0.029	0.162	0.128	0.03	0.116	0.062	0.121	0.047	0.093	0.001	0.002	0.025	0.019	0.013	0.08	0.13	0.136	0.089	0.174	0.117	0.004	0.037	0.138	0.07	0.142	0.128	0.09	0.004	0.009	0.008	0.001	0.001	0.026	0.026	0	0
90	470	170	0.307	0.182	0.559	0.146	0.151	0.037	0.01	0.145	0.539	0.158	0.048	0.576	0.732	0.397	0.035	0.257	0.544	0.334	0.095	0.228	0.011	0.05	0.055	0.011	0.089	0.129	0.529	0.558	0.551	0.519	0.361	0.345	0.083	0.389	0.188	0.455	0.467	0.25	0.008	0.019	0.664	0.002	0.003	0.322	0.008	0	0
110	470	170	0.259	0.15	0.743	0.188	0.186	0.056	0.017	0.273	0.77	0.215	0.063	0.778	0.946	0.66	0.042	0.341	0.791	0.17	0.129	0.303	0.015	0.021	0.086	0.015	0.062	0.087	0.689	0.721	0.56	0.745	0.514	0.425	0.109	0.537	0.243	0.638	0.723	0.282	0.01	0.029	0.86	0.002	0.005	0.332	0.013	0	0
130	470	170	0.21	0.093	0.764	0.225	0.194	0.074	0.05	0.382	0.579	0.245	0.082	0.664	0.851	0.739	0.05	0.376	0.743	0.248	0.135	0.325	0.012	0.019	0.082	0.026	0.054	0.098	0.705	0.779	0.502	0.676	0.53	0.175	0.11	0.548	0.249	0.697	0.84	0.286	0.016	0.032	0.736	0.002	0.015	0.292	0.019	0	0
150	470	170	0.171	0.082	0.754	0.21	0.163	0.063	0.03	0.472	0.353	0.272	0.11	0.543	0.726	0.86	0.053	0.392	0.697	0.217	0.139	0.308	0.018	0.045	0.074	0.022	0.032	0.115	0.742	0.715	0.498	0.685	0.507	0.131	0.11	0.574	0.253	0.749	0.885	0.321	0.043	0.033	0.529	0.002	0.009	0.282	0.017	0.001	0.001
170	470	170	0.139	0.058	0.663	0.168	0.147	0.082	0.021	0.477	0.197	0.24	0.106	0.479	0.567	0.703	0.052	0.355	0.736	0.138	0.132	0.336	0.023	0.034	0.077	0.02	0.011	0.127	0.693	0.643	0.457	0.603	0.468	0.256	0.108	0.552	0.243	0.75	0.728	0.312	0.057	0.031	0.404	0.002	0.006	0.228	0.018	0	0
190	470	170	0.115	0.027	0.406	0.15	0.157	0.077	0.036	0.18	0.254	0.137	0.081	0.375	0.521	0.335	0.035	0.312	0.441	0.217	0.118	0.261	0.006	0.011	0.074	0.021	0.01	0.123	0.582	0.559	0.395	0.562	0.463	0.199	0.087	0.516	0.229	0.656	0.441	0.266	0.018	0.034	0.253	0.002	0.055	0.128	0.022	0.027	0.001
210	470	170	0.106	0.029	0.209	0.13	0.164	0.051	0.034	0.059	0.319	0.125	0.088	0.317	0.463	0.189	0.034	0.252	0.196	0.11	0.098	0.202	0.002	0.008	0.059	0.028	0.018	0.085	0.45	0.491	0.302	0.461	0.326	0.071	0.066	0.422	0.199	0.489	0.326	0.22	0.002	0.032	0.178	0.003	0.006	0.137	0.021	0.017	0
230	470	170	0.087	0.03	0.163	0.128	0.174	0.045	0.036	0.05	0.231	0.137	0.1	0.302	0.419	0.177	0.07	0.2	0.172	0.115	0.083	0.171	0.001	0.044	0.045	0.036	0.034	0.078	0.351	0.34	0.236	0.395	0.275	0.027	0.06	0.351	0.2	0.397	0.271	0.192	0.003	0.026	0.149	0.005	0.005	0.114	0.022	0.001	0
250	470	170	0.077	0.034	0.124	0.097	0.173	0.037	0.041	0.042	0.21	0.095	0.08	0.254	0.352	0.184	0.05	0.152	0.143	0.102	0.066	0.145	0.001	0.011	0.039	0.019	0.021	0.072	0.266	0.254	0.172	0.312	0.207	0.012	0.043	0.273	0.129	0.309	0.237	0.151	0.002	0.022	0.143	0.001	0.004	0.095	0.013	0	0
270	470	170	0.068	0.035	0.107	0.07	0.181	0.034	0.02	0.045	0.152	0.067	0.066	0.158	0.299	0.204	0.028	0.118	0.121	0.105	0.057	0.128	0.002	0.006	0.034	0.025	0.014	0.068	0.2	0.197	0.125	0.238	0.157	0.007	0.033	0.198	0.091	0.228	0.205	0.119	0.003	0.019	0.114	0.001	0.004	0.074	0.015	0	0
290	470	170	0.058	0.03	0.039	0.052	0.18	0.025	0.005	0.021	0.047	0.05	0.046	0.05	0.175	0.135	0.024	0.125	0.081	0.124	0.053	0.105	0.002	0.004	0.025	0.03	0.015	0.115	0.158	0.167	0.103	0.2	0.133	0.004	0.033	0.167	0.082	0.178	0.158	0.107	0.004	0.017	0.027	0.001	0.005	0.034	0.027	0	0
90	470	190	0.314	0.244	0.781	0.215	0.2	0.053	0.016	0.21	0.718	0.17	0.052	0.713	0.888	0.619	0.035	0.297	0.69	0.305	0.116	0.28	0.017	0.074	0.066	0.013	0.068	0.106	0.625	0.686	0.531	0.586	0.449	0.337	0.098	0.556	0.23	0.562	0.654	0.254	0.035	0.032	1	0.004	0.006	0.347	0.016	0.047	0
110	470	190	0.256	0.144	0.729	0.252	0.199	0.068	0.05	0.279	0.685	0.207	0.062	0.722	0.866	0.755	0.046	0.334	0.724	0.328	0.126	0.309	0.017	0.035	0.076	0.021	0.049	0.101	0.658	0.726	0.465	0.636	0.491	0.23	0.1	0.567	0.239	0.642	0.783	0.257	0.02	0.028	0.836	0.002	0.005	0.294	0.018	0.002	0
130	470	190	0.208	0.09	0.753	0.207	0.217	0.065	0.055	0.467	0.458	0.222	0.081	0.618	0.754	0.882	0.048	0.355	0.684	0.257	0.131	0.334	0.016	0.022	0.074	0.037	0.041	0.11	0.698	0.78	0.49	0.627	0.518	0.124	0.097	0.565	0.25	0.685	0.878	0.274	0.029	0.033	0.6	0.002	0.009	0.307	0.025	0	0
150	470	190	0.166	0.049	0.758	0.195	0.162	0.074	0.029	0.514	0.249	0.252	0.099	0.498	0.624	0.893	0.045	0.35	0.712	0.14	0.128	0.321	0.019	0.021	0.072	0.019	0.012	0.107	0.682	0.638	0.464	0.562	0.445	0.121	0.101	0.554	0.235	0.687	0.875	0.286	0.055	0.024	0.45	0.002	0.008	0.273	0.019	0.002	0.005
170	470	190	0.14	0.034	0.612	0.167	0.143	0.086	0.027	0.322	0.174	0.155	0.078	0.436	0.427	0.305	0.036	0.326	0.559	0.419	0.121	0.275	0.01	0.015	0.066	0.024	0.009	0.102	0.626	0.585	0.419	0.552	0.447	0.333	0.113	0.547	0.227	0.672	0.54	0.277	0.039	0.027	0.274	0.002	0.006	0.103	0.021	0.013	0.002
190	470	190	0.12	0.041	0.169	0.124	0.167	0.044	0.064	0.07	0.293	0.109	0.069	0.299	0.335	0.117	0.023	0.247	0.237	0.11	0.095	0.202	0.002	0.006	0.052	0.018	0.009	0.071	0.459	0.453	0.318	0.533	0.329	0.141	0.066	0.442	0.188	0.501	0.343	0.221	0.002	0.029	0.125	0.002	0.01	0.044	0.021	0.047	0
210	470	190	0.094	0.028	0.104	0.107	0.159	0.036	0.115	0.068	0.214	0.11	0.076	0.282	0.334	0.121	0.027	0.204	0.171	0.089	0.079	0.166	0.001	0.004	0.039	0.02	0.016	0.068	0.337	0.417	0.236	0.378	0.26	0.084	0.05	0.351	0.149	0.383	0.26	0.173	0.001	0.028	0.122	0.002	0.003	0.062	0.022	0.002	0
230	470	190	0.082	0.022	0.086	0.141	0.194	0.044	0.124	0.071	0.116	0.151	0.117	0.288	0.293	0.19	0.075	0.179	0.208	0.106	0.071	0.154	0.002	0.051	0.039	0.056	0.055	0.076	0.299	0.301	0.19	0.331	0.252	0.032	0.048	0.296	0.148	0.337	0.233	0.155	0.005	0.028	0.077	0.01	0.005	0.112	0.026	0	0
250	470	190	0.084	0.023	0.109	0.102	0.225	0.043	0.108	0.083	0.094	0.11	0.082	0.266	0.299	0.319	0.065	0.151	0.234	0.112	0.062	0.147	0.002	0.017	0.036	0.026	0.033	0.07	0.261	0.247	0.154	0.312	0.207	0.021	0.04	0.247	0.116	0.287	0.249	0.139	0.006	0.023	0.093	0.002	0.004	0.1	0.019	0	0
270	470	190	0.071	0.022	0.157	0.079	0.191	0.041	0.068	0.121	0.104	0.083	0.075	0.24	0.353	0.485	0.034	0.124	0.241	0.105	0.056	0.153	0.003	0.007	0.032	0.023	0.019	0.062	0.216	0.221	0.127	0.286	0.168	0.012	0.033	0.201	0.097	0.254	0.315	0.131	0.008	0.017	0.132	0.001	0.002	0.105	0.014	0.003	0
290	470	190	0.06	0.025	0.119	0.065	0.183	0.041	0.035	0.086	0.083	0.063	0.058	0.151	0.285	0.4	0.023	0.112	0.211	0.12	0.059	0.203	0.003	0.007	0.028	0.02	0.028	0.07	0.182	0.201	0.108	0.251	0.144	0.006	0.03	0.18	0.095	0.233	0.348	0.135	0.009	0.018	0.101	0.001	0.019	0.049	0.014	0.001	0
310	470	190	0.053	0.025	0.062	0.051	0.164	0.056	0.021	0.058	0.045	0.047	0.053	0.064	0.189	0.261	0.019	0.113	0.152	0.114	0.049	0.176	0.002	0.004	0.021	0.022	0.037	0.068	0.144	0.156	0.089	0.21	0.129	0.005	0.029	0.17	0.092	0.18	0.279	0.117	0.004	0.012	0.056	0.001	0.003	0.03	0.015	0	0
70	470	210	0.386	0.138	0.622	0.158	0.204	0.039	0.013	0.167	0.498	0.122	0.046	0.596	0.94	0.547	0.024	0.237	0.422	0.22	0.092	0.253	0.014	0.034	0.056	0.011	0.054	0.137	0.499	0.565	0.423	0.525	0.402	0.207	0.077	0.382	0.19	0.451	0.534	0.218	0.06	0.031	0.927	0.002	0.008	0.327	0.011	0	0
90	470	210	0.269	0.153	0.727	0.243	0.205	0.062	0.046	0.293	0.729	0.186	0.054	0.676	0.848	0.666	0.033	0.295	0.581	0.295	0.113	0.299	0.018	0.092	0.055	0.018	0.047	0.078	0.605	0.642	0.448	0.6	0.475	0.156	0.098	0.495	0.23	0.568	0.753	0.248	0.059	0.027	0.919	0.001	0.005	0.313	0.015	0.001	0
110	470	210	0.233	0.132	0.597	0.26	0.189	0.059	0.045	0.428	0.53	0.194	0.064	0.642	0.796	0.761	0.049	0.331	0.646	0.301	0.122	0.33	0.025	0.04	0.063	0.022	0.049	0.106	0.661	0.686	0.477	0.603	0.515	0.084	0.096	0.544	0.246	0.63	0.875	0.256	0.056	0.026	0.676	0.003	0.016	0.296	0.021	0.02	0
130	470	210	0.203	0.066	0.84	0.183	0.148	0.063	0.029	0.499	0.32	0.199	0.078	0.578	0.638	0.991	0.046	0.33	0.71	0.146	0.121	0.329	0.026	0.029	0.062	0.038	0.012	0.116	0.658	0.712	0.467	0.606	0.488	0.103	0.099	0.553	0.243	0.625	0.898	0.266	0.055	0.032	0.568	0.001	0.008	0.288	0.019	0	0
150	470	210	0.168	0.03	0.672	0.17	0.16	0.083	0.024	0.464	0.193	0.183	0.079	0.467	0.502	0.509	0.044	0.306	0.684	0.144	0.115	0.296	0.013	0.039	0.061	0.016	0.012	0.159	0.602	0.552	0.415	0.65	0.461	0.391	0.083	0.51	0.221	0.602	0.63	0.244	0.057	0.023	0.402	0.004	0.004	0.159	0.021	0.015	0.003
170	470	210	0.137	0.021	0.201	0.117	0.137	0.052	0.111	0.117	0.199	0.098	0.057	0.328	0.271	0.107	0.023	0.231	0.292	0.252	0.121	0.2	0.002	0.002	0.047	0.024	0.026	0.097	0.446	0.43	0.301	0.528	0.328	0.148	0.067	0.424	0.18	0.458	0.342	0.203	0.007	0.029	0.111	0.001	0.004	0.049	0.023	0.041	0
190	470	210	0.106	0.019	0.065	0.11	0.145	0.041	0.2	0.075	0.153	0.103	0.065	0.265	0.247	0.102	0.025	0.191	0.185	0.081	0.124	0.164	0.001	0.002	0.038	0.017	0.026	0.063	0.338	0.383	0.216	0.431	0.243	0.068	0.069	0.345	0.14	0.356	0.256	0.16	0.01	0.026	0.059	0.001	0.007	0.042	0.023	0.02	0
210	470	210	0.089	0.021	0.061	0.114	0.16	0.045	0.233	0.08	0.081	0.104	0.08	0.268	0.232	0.161	0.029	0.184	0.172	0.091	0.082	0.168	0.002	0.005	0.034	0.023	0.028	0.065	0.3	0.406	0.195	0.352	0.226	0.032	0.049	0.31	0.135	0.338	0.233	0.149	0.004	0.026	0.057	0.002	0.004	0.068	0.023	0.003	0
230	470	210	0.087	0.024	0.07	0.113	0.189	0.058	0.237	0.084	0.066	0.103	0.093	0.261	0.241	0.24	0.049	0.17	0.23	0.105	0.067	0.159	0.002	0.011	0.034	0.028	0.048	0.069	0.271	0.274	0.166	0.356	0.213	0.023	0.045	0.274	0.122	0.318	0.228	0.139	0.005	0.028	0.059	0.002	0.004	0.086	0.029	0	0
250	470	210	0.078	0.026	0.102	0.103	0.198	0.049	0.173	0.09	0.069	0.093	0.075	0.241	0.258	0.334	0.056	0.145	0.237	0.108	0.059	0.146	0.003	0.006	0.033	0.025	0.049	0.067	0.246	0.245	0.141	0.327	0.187	0.024	0.039	0.237	0.108	0.282	0.242	0.129	0.006	0.023	0.069	0.002	0.003	0.085	0.023	0	0
270	470	210	0.067	0.021	0.16	0.092	0.19	0.052	0.122	0.132	0.065	0.081	0.072	0.228	0.302	0.459	0.037	0.123	0.266	0.119	0.054	0.15	0.004	0.006	0.032	0.025	0.036	0.063	0.214	0.224	0.115	0.309	0.162	0.015	0.034	0.199	0.096	0.251	0.298	0.122	0.011	0.02	0.108	0.002	0.004	0.097	0.016	0	0
290	470	210	0.058	0.023	0.138	0.088	0.184	0.074	0.114	0.1	0.064	0.068	0.07	0.16	0.271	0.39	0.023	0.109	0.269	0.118	0.053	0.239	0.004	0.011	0.027	0.022	0.066	0.059	0.187	0.209	0.104	0.264	0.149	0.01	0.031	0.186	0.098	0.238	0.331	0.119	0.012	0.019	0.087	0.002	0.05	0.06	0.014	0	0
310	470	210	0.049	0.025	0.057	0.076	0.165	0.114	0.084	0.061	0.035	0.055	0.078	0.08	0.207	0.262	0.019	0.092	0.232	0.133	0.047	0.188	0.003	0.005	0.021	0.019	0.052	0.05	0.149	0.169	0.088	0.214	0.13	0.006	0.03	0.169	0.093	0.191	0.265	0.106	0.004	0.013	0.041	0.001	0.029	0.064	0.011	0	0
70	470	230	0.271	0.098	0.471	0.22	0.199	0.042	0.013	0.201	0.529	0.166	0.053	0.651	0.963	0.657	0.024	0.251	0.385	0.214	0.096	0.284	0.01	0.056	0.036	0.011	0.025	0.134	0.584	0.607	0.413	0.605	0.45	0.062	0.08	0.4	0.198	0.475	0.646	0.2	0.035	0.039	0.868	0.002	0.021	0.336	0.02	0.001	0
90	470	230	0.227	0.129	0.587	0.247	0.202	0.061	0.033	0.424	0.61	0.206	0.058	0.679	0.77	0.72	0.032	0.31	0.589	0.264	0.116	0.309	0.03	0.051	0.049	0.017	0.037	0.069	0.677	0.673	0.482	0.609	0.554	0.062	0.105	0.512	0.237	0.577	0.819	0.246	0.069	0.033	0.777	0.001	0.005	0.334	0.018	0	0
110	470	230	0.222	0.112	0.602	0.229	0.245	0.059	0.013	0.497	0.337	0.19	0.062	0.629	0.667	1	0.039	0.319	0.704	0.221	0.118	0.325	0.042	0.02	0.053	0.013	0.013	0.094	0.688	0.763	0.461	0.581	0.533	0.092	0.092	0.543	0.24	0.618	0.925	0.25	0.077	0.028	0.596	0.001	0.011	0.317	0.015	0	0.002
130	470	230	0.199	0.053	0.752	0.172	0.139	0.088	0.009	0.513	0.2	0.169	0.064	0.549	0.521	0.725	0.038	0.295	0.754	0.305	0.113	0.288	0.024	0.029	0.053	0.017	0.008	0.136	0.612	0.663	0.403	0.537	0.453	0.348	0.086	0.525	0.223	0.575	0.732	0.234	0.067	0.021	0.478	0.001	0.003	0.22	0.021	0.002	0.001
150	470	230	0.155	0.024	0.31	0.116	0.126	0.068	0.073	0.233	0.148	0.09	0.047	0.375	0.3	0.149	0.024	0.218	0.43	0.51	0.166	0.194	0.004	0.017	0.044	0.011	0.021	0.117	0.461	0.424	0.304	0.503	0.408	0.379	0.069	0.441	0.178	0.444	0.412	0.212	0.035	0.023	0.217	0.006	0.003	0.052	0.02	0.017	0
170	470	230	0.116	0.019	0.045	0.095	0.133	0.039	0.278	0.085	0.128	0.089	0.053	0.277	0.198	0.08	0.021	0.17	0.224	0.072	0.336	0.151	0.002	0.002	0.044	0.012	0.063	0.057	0.313	0.342	0.206	0.49	0.224	0.037	0.073	0.32	0.126	0.326	0.242	0.16	0.019	0.023	0.043	0.001	0.003	0.014	0.017	0.014	0
190	470	230	0.091	0.023	0.031	0.114	0.142	0.041	0.409	0.078	0.054	0.097	0.063	0.257	0.181	0.102	0.025	0.163	0.265	0.075	0.311	0.154	0.002	0.002	0.042	0.019	0.083	0.06	0.278	0.357	0.17	0.43	0.203	0.018	0.091	0.292	0.112	0.312	0.208	0.131	0.021	0.023	0.029	0.001	0.002	0.03	0.019	0.008	0.001
210	470	230	0.08	0.019	0.034	0.127	0.165	0.052	0.432	0.063	0.034	0.106	0.088	0.262	0.198	0.163	0.039	0.171	0.213	0.093	0.087	0.149	0.001	0.004	0.036	0.025	0.052	0.065	0.279	0.398	0.168	0.44	0.219	0.022	0.05	0.292	0.122	0.313	0.219	0.141	0.005	0.028	0.025	0.002	0.004	0.048	0.028	0.013	0
230	470	230	0.08	0.02	0.038	0.115	0.191	0.056	0.398	0.051	0.035	0.098	0.09	0.247	0.201	0.215	0.046	0.156	0.197	0.107	0.064	0.142	0.001	0.007	0.036	0.03	0.056	0.064	0.265	0.256	0.146	0.375	0.197	0.023	0.045	0.258	0.114	0.295	0.215	0.139	0.004	0.026	0.028	0.002	0.003	0.054	0.027	0.006	0
250	470	230	0.074	0.02	0.056	0.106	0.195	0.056	0.286	0.045	0.037	0.086	0.077	0.225	0.201	0.255	0.05	0.133	0.189	0.122	0.055	0.135	0.001	0.007	0.032	0.03	0.068	0.061	0.231	0.228	0.121	0.313	0.171	0.02	0.041	0.218	0.1	0.266	0.197	0.119	0.004	0.023	0.034	0.002	0.003	0.05	0.023	0.001	0
270	470	230	0.064	0.02	0.081	0.101	0.199	0.06	0.232	0.061	0.042	0.074	0.073	0.181	0.218	0.313	0.036	0.119	0.2	0.143	0.05	0.135	0.002	0.005	0.028	0.039	0.059	0.061	0.199	0.21	0.101	0.275	0.151	0.015	0.036	0.183	0.091	0.24	0.2	0.111	0.008	0.021	0.044	0.003	0.01	0.053	0.025	0.002	0
290	470	230	0.056	0.023	0.046	0.109	0.186	0.057	0.175	0.046	0.038	0.062	0.066	0.093	0.162	0.191	0.022	0.11	0.163	0.207	0.048	0.157	0.004	0.003	0.026	0.023	0.051	0.055	0.171	0.19	0.089	0.237	0.137	0.012	0.032	0.169	0.091	0.224	0.166	0.103	0.011	0.02	0.017	0.002	0.01	0.054	0.025	0.002	0
310	470	230	0.048	0.022	0.02	0.068	0.167	0.057	0.144	0.017	0.029	0.054	0.064	0.041	0.114	0.157	0.019	0.094	0.134	0.277	0.04	0.105	0.004	0.002	0.018	0.01	0.022	0.042	0.132	0.147	0.076	0.193	0.121	0.007	0.027	0.146	0.084	0.167	0.137	0.089	0.002	0.012	0.003	0.002	0.001	0.071	0.014	0	0
330	470	230	0.038	0.021	0.013	0.036	0.151	0.021	0.078	0.009	0.015	0.04	0.049	0.021	0.05	0.091	0.007	0.082	0.092	0.183	0.031	0.062	0.002	0.002	0.012	0.003	0.013	0.032	0.098	0.108	0.056	0.149	0.087	0.004	0.02	0.104	0.049	0.108	0.101	0.071	0	0.003	0.001	0.001	0.001	0.049	0.009	0	0
50	470	250	0.165	0.07	0.162	0.144	0.108	0.013	0.002	0.065	0.199	0.053	0.023	0.241	0.501	0.244	0.013	0.106	0.07	0.096	0.044	0.114	0.002	0.013	0.02	0.004	0.005	0.045	0.262	0.307	0.173	0.263	0.205	0.007	0.039	0.22	0.1	0.213	0.221	0.084	0.005	0.021	0.351	0.002	0.006	0.086	0.01	0	0.007
70	470	250	0.212	0.114	0.457	0.31	0.144	0.04	0.003	0.168	0.439	0.143	0.058	0.609	0.797	0.789	0.024	0.24	0.4	0.11	0.104	0.294	0.022	0.071	0.032	0.008	0.01	0.057	0.652	0.649	0.445	0.529	0.464	0.021	0.083	0.462	0.221	0.497	0.734	0.199	0.052	0.058	0.833	0.001	0.101	0.324	0.016	0.006	0.004
90	470	250	0.231	0.15	0.592	0.235	0.2	0.058	0.009	0.399	0.387	0.177	0.058	0.696	0.601	0.885	0.029	0.282	0.647	0.163	0.116	0.357	0.031	0.048	0.067	0.01	0.01	0.069	0.709	0.659	0.479	0.563	0.506	0.031	0.099	0.533	0.247	0.563	0.845	0.248	0.073	0.018	0.75	0.001	0.007	0.367	0.02	0.002	0
110	470	250	0.209	0.093	0.607	0.264	0.222	0.083	0.016	0.451	0.329	0.16	0.056	0.627	0.597	0.858	0.039	0.283	0.735	0.394	0.107	0.318	0.031	0.029	0.054	0.01	0.007	0.124	0.65	0.719	0.41	0.511	0.449	0.193	0.088	0.523	0.225	0.557	0.788	0.22	0.081	0.018	0.555	0.001	0.006	0.269	0.019	0.001	0
130	470	250	0.181	0.033	0.525	0.161	0.178	0.085	0.038	0.326	0.128	0.109	0.045	0.478	0.354	0.308	0.028	0.225	0.61	0.321	0.097	0.238	0.009	0.014	0.045	0.012	0.008	0.242	0.521	0.574	0.331	0.481	0.382	0.539	0.091	0.494	0.187	0.493	0.473	0.201	0.058	0.022	0.321	0.001	0.002	0.105	0.017	0.004	0
150	470	250	0.135	0.021	0.086	0.101	0.118	0.044	0.263	0.078	0.087	0.076	0.041	0.303	0.156	0.075	0.017	0.169	0.228	0.116	0.15	0.156	0.001	0.001	0.048	0.009	0.022	0.073	0.34	0.354	0.233	0.544	0.272	0.088	0.053	0.348	0.139	0.339	0.283	0.153	0.006	0.022	0.064	0.001	0.002	0.013	0.021	0.03	0
170	470	250	0.102	0.016	0.029	0.104	0.125	0.04	0.538	0.059	0.057	0.096	0.055	0.285	0.174	0.086	0.02	0.171	0.224	0.067	0.306	0.151	0.002	0.003	0.037	0.011	0.047	0.055	0.315	0.349	0.206	0.56	0.221	0.022	0.059	0.324	0.131	0.335	0.236	0.146	0.011	0.024	0.026	0.001	0.002	0.004	0.02	0.059	0
190	470	250	0.088	0.013	0.023	0.113	0.158	0.07	0.586	0.062	0.022	0.094	0.059	0.26	0.162	0.105	0.024	0.161	0.26	0.074	0.238	0.143	0.001	0.003	0.043	0.02	0.078	0.058	0.276	0.348	0.168	0.414	0.205	0.019	0.074	0.287	0.114	0.304	0.206	0.126	0.015	0.026	0.021	0.001	0.003	0.011	0.021	0.009	0
210	470	250	0.077	0.013	0.025	0.115	0.163	0.069	0.53	0.046	0.023	0.092	0.068	0.25	0.173	0.142	0.042	0.155	0.19	0.092	0.081	0.132	0.001	0.003	0.033	0.026	0.061	0.061	0.254	0.37	0.142	0.377	0.197	0.022	0.048	0.267	0.11	0.284	0.193	0.122	0.003	0.027	0.021	0.002	0.004	0.022	0.028	0.002	0
230	470	250	0.073	0.017	0.027	0.108	0.182	0.05	0.455	0.04	0.024	0.084	0.069	0.231	0.168	0.184	0.045	0.139	0.158	0.114	0.057	0.124	0.001	0.004	0.03	0.027	0.07	0.057	0.226	0.222	0.119	0.32	0.177	0.023	0.039	0.233	0.101	0.262	0.174	0.114	0.002	0.023	0.022	0.002	0.003	0.032	0.028	0.001	0
250	470	250	0.067	0.019	0.035	0.105	0.187	0.057	0.381	0.028	0.027	0.072	0.061	0.206	0.166	0.214	0.04	0.126	0.15	0.143	0.051	0.117	0.001	0.004	0.03	0.026	0.08	0.054	0.198	0.208	0.102	0.275	0.157	0.017	0.034	0.201	0.093	0.236	0.16	0.105	0.003	0.019	0.027	0.001	0.003	0.041	0.024	0.001	0
270	470	250	0.058	0.02	0.042	0.084	0.19	0.055	0.264	0.034	0.03	0.062	0.055	0.145	0.164	0.238	0.031	0.113	0.133	0.172	0.045	0.107	0.002	0.004	0.025	0.027	0.073	0.05	0.169	0.186	0.086	0.233	0.136	0.011	0.029	0.166	0.083	0.207	0.144	0.098	0.006	0.019	0.029	0.001	0.049	0.04	0.024	0.002	0
290	470	250	0.056	0.022	0.022	0.064	0.194	0.043	0.16	0.025	0.026	0.048	0.045	0.066	0.112	0.112	0.019	0.116	0.099	0.23	0.042	0.094	0.005	0.003	0.021	0.018	0.048	0.047	0.139	0.163	0.068	0.194	0.117	0.009	0.029	0.137	0.08	0.175	0.125	0.082	0.008	0.017	0.008	0.001	0.008	0.064	0.02	0	0
310	470	250	0.052	0.026	0.014	0.045	0.169	0.026	0.133	0.011	0.018	0.044	0.043	0.033	0.081	0.088	0.013	0.105	0.095	0.277	0.04	0.075	0.003	0.002	0.016	0.009	0.021	0.039	0.122	0.136	0.063	0.174	0.104	0.005	0.024	0.123	0.075	0.145	0.113	0.079	0.001	0.007	0.002	0.001	0.001	0.071	0.013	0	0
330	470	250	0.039	0.024	0.011	0.035	0.153	0.015	0.058	0.006	0.009	0.038	0.039	0.019	0.041	0.073	0.004	0.097	0.085	0.226	0.031	0.06	0.001	0.002	0.011	0.003	0.015	0.027	0.096	0.109	0.054	0.144	0.081	0.004	0.019	0.094	0.047	0.105	0.093	0.067	0	0.002	0.001	0.001	0.001	0.056	0.009	0	0
50	470	270	0.156	0.053	0.133	0.122	0.09	0.012	0.002	0.053	0.153	0.042	0.018	0.213	0.371	0.171	0.011	0.095	0.053	0.099	0.042	0.097	0.003	0.021	0.014	0.003	0.005	0.06	0.238	0.279	0.159	0.235	0.191	0.004	0.036	0.223	0.093	0.202	0.185	0.07	0.008	0.014	0.305	0.003	0.005	0.034	0.016	0	0
70	470	270	0.203	0.089	0.393	0.3	0.13	0.038	0.003	0.147	0.384	0.119	0.051	0.49	0.606	0.601	0.025	0.19	0.284	0.179	0.094	0.26	0.03	0.047	0.034	0.009	0.006	0.043	0.516	0.534	0.365	0.446	0.374	0.042	0.078	0.405	0.179	0.44	0.526	0.171	0.055	0.033	0.754	0.007	0.015	0.27	0.026	0.015	0.005
90	470	270	0.197	0.118	0.493	0.227	0.163	0.066	0.008	0.324	0.358	0.14	0.048	0.664	0.518	0.563	0.029	0.229	0.645	0.186	0.098	0.286	0.025	0.038	0.053	0.008	0.006	0.061	0.588	0.56	0.396	0.472	0.389	0.188	0.085	0.482	0.202	0.467	0.574	0.198	0.091	0.016	0.684	0.001	0.007	0.246	0.017	0.005	0
110	470	270	0.195	0.077	0.487	0.215	0.261	0.086	0.011	0.356	0.262	0.123	0.044	0.565	0.5	0.477	0.03	0.22	0.665	0.432	0.091	0.295	0.013	0.023	0.042	0.009	0.007	0.138	0.546	0.513	0.335	0.428	0.351	0.726	0.073	0.474	0.175	0.454	0.499	0.19	0.071	0.018	0.485	0.001	0.002	0.158	0.015	0.001	0
130	470	270	0.162	0.029	0.266	0.149	0.15	0.049	0.176	0.184	0.094	0.076	0.034	0.383	0.244	0.111	0.022	0.18	0.395	0.425	0.074	0.181	0.002	0.008	0.038	0.01	0.008	0.124	0.409	0.462	0.266	0.551	0.32	0.45	0.062	0.413	0.15	0.379	0.318	0.148	0.023	0.049	0.167	0.002	0.008	0.062	0.024	0.028	0
150	470	270	0.121	0.024	0.028	0.102	0.098	0.043	0.648	0.046	0.057	0.091	0.047	0.283	0.136	0.076	0.018	0.163	0.186	0.063	0.074	0.137	0.001	0.002	0.037	0.009	0.014	0.052	0.308	0.323	0.197	0.58	0.23	0.042	0.041	0.324	0.119	0.32	0.235	0.121	0.001	0.021	0.014	0.001	0.002	0.005	0.031	0.035	0
170	470	270	0.101	0.014	0.019	0.09	0.106	0.033	0.655	0.032	0.027	0.091	0.055	0.222	0.173	0.093	0.026	0.158	0.152	0.067	0.098	0.132	0.001	0.002	0.028	0.013	0.019	0.055	0.284	0.316	0.171	0.466	0.214	0.025	0.042	0.301	0.107	0.301	0.212	0.117	0.002	0.024	0.005	0.001	0.002	0.001	0.034	0.013	0
190	470	270	0.086	0.014	0.018	0.095	0.146	0.041	0.531	0.033	0.019	0.093	0.06	0.204	0.162	0.112	0.044	0.14	0.127	0.086	0.104	0.121	0.001	0.006	0.026	0.025	0.058	0.056	0.254	0.306	0.142	0.39	0.192	0.023	0.043	0.258	0.102	0.259	0.173	0.11	0.006	0.026	0.008	0.002	0.003	0.006	0.039	0.01	0
210	470	270	0.078	0.016	0.019	0.105	0.167	0.088	0.425	0.032	0.028	0.094	0.07	0.227	0.163	0.128	0.054	0.129	0.152	0.109	0.068	0.117	0.001	0.009	0.028	0.023	0.072	0.056	0.226	0.331	0.117	0.285	0.178	0.021	0.042	0.229	0.093	0.236	0.163	0.106	0.008	0.026	0.017	0.004	0.003	0.019	0.035	0.004	0
230	470	270	0.073	0.019	0.026	0.093	0.183	0.043	0.38	0.032	0.027	0.07	0.055	0.204	0.144	0.142	0.04	0.121	0.135	0.132	0.053	0.127	0.001	0.004	0.026	0.021	0.055	0.049	0.193	0.199	0.1	0.253	0.159	0.02	0.035	0.21	0.088	0.228	0.169	0.122	0.003	0.022	0.02	0.002	0.003	0.026	0.025	0.006	0
250	470	270	0.06	0.021	0.03	0.093	0.187	0.034	0.319	0.021	0.025	0.061	0.05	0.181	0.133	0.136	0.032	0.117	0.133	0.16	0.047	0.132	0.001	0.003	0.026	0.02	0.06	0.046	0.172	0.188	0.085	0.247	0.145	0.014	0.03	0.185	0.083	0.209	0.165	0.129	0.003	0.018	0.021	0.001	0.002	0.031	0.022	0.009	0
270	470	270	0.051	0.022	0.031	0.079	0.183	0.031	0.206	0.025	0.03	0.055	0.047	0.139	0.129	0.129	0.021	0.109	0.111	0.196	0.042	0.122	0.001	0.002	0.023	0.021	0.065	0.045	0.155	0.174	0.074	0.205	0.128	0.01	0.026	0.156	0.079	0.193	0.151	0.125	0.004	0.016	0.022	0.002	0.011	0.029	0.018	0.005	0
290	470	270	0.049	0.022	0.018	0.052	0.181	0.021	0.078	0.019	0.025	0.045	0.037	0.053	0.086	0.084	0.014	0.117	0.069	0.258	0.037	0.087	0.001	0.002	0.018	0.014	0.032	0.041	0.125	0.15	0.065	0.179	0.107	0.006	0.024	0.126	0.083	0.167	0.112	0.085	0.005	0.013	0.006	0.001	0.009	0.046	0.015	0	0
310	470	270	0.052	0.022	0.012	0.04	0.164	0.016	0.076	0.008	0.01	0.041	0.039	0.026	0.075	0.079	0.012	0.099	0.094	0.28	0.034	0.072	0.001	0.001	0.015	0.009	0.017	0.03	0.111	0.124	0.056	0.156	0.094	0.003	0.021	0.112	0.075	0.139	0.102	0.075	0	0.006	0.002	0.001	0.001	0.057	0.009	0	0
330	470	270	0.038	0.019	0.01	0.033	0.151	0.012	0.038	0.005	0.006	0.037	0.038	0.016	0.038	0.068	0.003	0.118	0.082	0.308	0.031	0.057	0.001	0.001	0.01	0.003	0.014	0.021	0.088	0.104	0.049	0.135	0.073	0.003	0.018	0.09	0.047	0.103	0.085	0.066	0	0.002	0.001	0.004	0.002	0.06	0.007	0	0
50	470	290	0.099	0.031	0.087	0.079	0.062	0.008	0.001	0.032	0.089	0.029	0.016	0.154	0.223	0.08	0.011	0.062	0.04	0.067	0.03	0.072	0.002	0.015	0.018	0.003	0.007	0.083	0.165	0.182	0.109	0.166	0.117	0.003	0.032	0.145	0.063	0.119	0.113	0.049	0.003	0.016	0.238	0.004	0.025	0.011	0.017	0.001	0.006
70	470	290	0.14	0.057	0.272	0.213	0.082	0.026	0.006	0.108	0.223	0.071	0.036	0.327	0.462	0.265	0.016	0.146	0.162	0.11	0.068	0.168	0.009	0.025	0.022	0.007	0.006	0.037	0.312	0.31	0.255	0.279	0.219	0.092	0.046	0.264	0.114	0.257	0.21	0.119	0.047	0.055	0.633	0.002	0.131	0.113	0.019	0	0.011
90	470	290	0.193	0.068	0.324	0.228	0.111	0.04	0.015	0.229	0.339	0.087	0.035	0.511	0.41	0.211	0.024	0.18	0.501	0.522	0.074	0.19	0.009	0.038	0.023	0.005	0.006	0.112	0.401	0.331	0.283	0.321	0.252	0.608	0.052	0.344	0.135	0.311	0.269	0.144	0.125	0.023	0.573	0.002	0.007	0.105	0.025	0.004	0.001
110	470	290	0.175	0.061	0.335	0.124	0.218	0.04	0.035	0.226	0.186	0.092	0.034	0.433	0.47	0.182	0.025	0.155	0.465	0.658	0.068	0.153	0.004	0.022	0.025	0.009	0.006	0.249	0.369	0.318	0.256	0.329	0.263	0.852	0.048	0.342	0.129	0.311	0.241	0.146	0.088	0.016	0.394	0.001	0.011	0.065	0.014	0.001	0
130	470	290	0.144	0.02	0.153	0.095	0.16	0.036	0.534	0.157	0.072	0.058	0.031	0.363	0.218	0.098	0.02	0.161	0.308	0.368	0.061	0.143	0.001	0.004	0.027	0.006	0.008	0.171	0.316	0.365	0.219	0.647	0.265	0.315	0.043	0.315	0.113	0.294	0.217	0.132	0.024	0.035	0.104	0.001	0.028	0.028	0.039	0.034	0.001
150	470	290	0.113	0.015	0.021	0.093	0.092	0.039	0.8	0.031	0.033	0.069	0.038	0.242	0.12	0.073	0.017	0.143	0.154	0.063	0.054	0.12	0.001	0.001	0.024	0.008	0.012	0.052	0.244	0.259	0.162	0.514	0.199	0.04	0.034	0.272	0.097	0.267	0.182	0.106	0	0.021	0.002	0.001	0.004	0.002	0.053	0.051	0
170	470	290	0.095	0.014	0.016	0.072	0.098	0.028	0.671	0.021	0.019	0.072	0.043	0.187	0.157	0.091	0.021	0.138	0.099	0.069	0.052	0.123	0.001	0.001	0.022	0.01	0.012	0.05	0.233	0.273	0.145	0.413	0.191	0.027	0.032	0.257	0.095	0.249	0.186	0.105	0.001	0.025	0.001	0.001	0.003	0.002	0.042	0.012	0
190	470	290	0.098	0.016	0.015	0.071	0.142	0.027	0.448	0.02	0.02	0.064	0.043	0.151	0.144	0.092	0.027	0.128	0.079	0.093	0.049	0.112	0.001	0.002	0.019	0.021	0.029	0.051	0.201	0.274	0.118	0.345	0.172	0.02	0.033	0.224	0.087	0.213	0.15	0.096	0.002	0.027	0.004	0.003	0.005	0.005	0.044	0.008	0
210	470	290	0.079	0.018	0.015	0.082	0.16	0.063	0.287	0.025	0.021	0.063	0.045	0.176	0.127	0.1	0.044	0.118	0.113	0.117	0.055	0.139	0.001	0.004	0.023	0.016	0.036	0.051	0.185	0.303	0.1	0.293	0.159	0.018	0.031	0.207	0.084	0.203	0.152	0.121	0.006	0.027	0.015	0.002	0.003	0.019	0.035	0.002	0
230	470	290	0.067	0.024	0.015	0.081	0.174	0.026	0.21	0.025	0.037	0.066	0.053	0.188	0.136	0.141	0.038	0.103	0.109	0.149	0.046	0.264	0.001	0.003	0.023	0.015	0.114	0.044	0.164	0.166	0.082	0.213	0.139	0.014	0.028	0.184	0.077	0.194	0.242	0.308	0.003	0.018	0.031	0.001	0.002	0.046	0.023	0.015	0
250	470	290	0.054	0.038	0.016	0.091	0.174	0.022	0.181	0.013	0.045	0.064	0.056	0.166	0.129	0.135	0.027	0.099	0.11	0.173	0.044	0.242	0.001	0.003	0.023	0.015	0.124	0.041	0.15	0.163	0.072	0.193	0.127	0.009	0.024	0.162	0.072	0.184	0.236	0.297	0.005	0.016	0.023	0.001	0.001	0.042	0.018	0.031	0
270	470	290	0.045	0.035	0.016	0.12	0.174	0.026	0.154	0.013	0.032	0.051	0.046	0.131	0.111	0.1	0.017	0.105	0.113	0.196	0.041	0.148	0.001	0.002	0.021	0.019	0.084	0.041	0.144	0.163	0.067	0.181	0.12	0.009	0.024	0.149	0.074	0.18	0.17	0.173	0.014	0.015	0.013	0.001	0.001	0.026	0.016	0.038	0
290	470	290	0.039	0.024	0.013	0.071	0.173	0.019	0.07	0.011	0.023	0.042	0.038	0.058	0.088	0.075	0.014	0.18	0.085	0.254	0.037	0.093	0.001	0.001	0.018	0.012	0.031	0.038	0.128	0.141	0.06	0.172	0.107	0.005	0.024	0.131	0.09	0.16	0.12	0.097	0.008	0.011	0.004	0.001	0.001	0.025	0.01	0.001	0
310	470	290	0.036	0.02	0.011	0.037	0.164	0.013	0.045	0.005	0.008	0.037	0.035	0.023	0.066	0.066	0.01	0.16	0.065	0.315	0.03	0.065	0.001	0.001	0.012	0.007	0.014	0.027	0.102	0.107	0.05	0.15	0.087	0.003	0.02	0.105	0.081	0.122	0.09	0.072	0.001	0.006	0.002	0.001	0	0.033	0.007	0	0
330	470	290	0.032	0.019	0.008	0.029	0.148	0.01	0.025	0.004	0.005	0.034	0.033	0.015	0.031	0.058	0.002	0.141	0.055	0.262	0.027	0.051	0.001	0.001	0.009	0.002	0.012	0.019	0.075	0.092	0.044	0.124	0.065	0.002	0.016	0.074	0.045	0.091	0.072	0.058	0.002	0.002	0.001	0.002	0.009	0.04	0.009	0	0
150	490	130	0.134	0.038	0.444	0.127	0.201	0.044	0.007	0.095	0.501	0.168	0.112	0.481	0.911	0.598	0.045	0.265	0.332	0.138	0.107	0.244	0.011	0.014	0.071	0.013	0.012	0.082	0.552	0.599	0.361	0.524	0.346	0.059	0.088	0.46	0.207	0.56	0.526	0.427	0.015	0.021	0.669	0.002	0.012	0.25	0.013	0.02	0.001
170	490	130	0.111	0.1	0.499	0.135	0.247	0.061	0.007	0.136	0.419	0.176	0.136	0.496	0.905	0.562	0.056	0.267	0.516	0.136	0.113	0.274	0.02	0.019	0.097	0.014	0.012	0.081	0.575	0.507	0.355	0.515	0.365	0.124	0.1	0.49	0.217	0.608	0.542	0.318	0.021	0.031	0.678	0.003	0.357	0.222	0.01	0.047	0
190	490	130	0.104	0.138	0.621	0.134	0.198	0.08	0.005	0.164	0.27	0.141	0.14	0.448	0.925	0.339	0.063	0.253	0.676	0.226	0.116	0.253	0.008	0.035	0.085	0.014	0.009	0.094	0.578	0.507	0.345	0.533	0.377	0.355	0.087	0.492	0.213	0.599	0.47	0.296	0.035	0.03	0.597	0.002	0.019	0.127	0.011	0.02	0
210	490	130	0.07	0.074	0.38	0.1	0.169	0.04	0.028	0.061	0.211	0.084	0.087	0.338	0.582	0.237	0.036	0.183	0.369	0.234	0.085	0.187	0.002	0.016	0.061	0.012	0.007	0.086	0.397	0.411	0.255	0.479	0.277	0.224	0.073	0.367	0.159	0.411	0.336	0.205	0.007	0.013	0.345	0.001	0.002	0.08	0.006	0	0
110	490	150	0.216	0.047	0.445	0.109	0.158	0.034	0.005	0.087	0.355	0.105	0.048	0.475	0.814	0.592	0.03	0.227	0.189	0.161	0.087	0.237	0.006	0.005	0.059	0.022	0.018	0.187	0.488	0.459	0.332	0.419	0.321	0.045	0.066	0.364	0.169	0.449	0.475	0.568	0.009	0.023	0.719	0.003	0.01	0.258	0.006	0.001	0
130	490	150	0.156	0.06	0.564	0.156	0.232	0.05	0.02	0.162	0.531	0.217	0.096	0.604	0.926	0.655	0.039	0.319	0.373	0.154	0.123	0.303	0.012	0.021	0.083	0.053	0.02	0.078	0.661	0.641	0.442	0.599	0.437	0.106	0.097	0.522	0.233	0.668	0.661	0.403	0.015	0.048	0.767	0.002	0.033	0.292	0.014	0.001	0
150	490	150	0.126	0.052	0.607	0.159	0.321	0.061	0.004	0.271	0.483	0.245	0.132	0.558	0.822	0.65	0.045	0.359	0.653	0.157	0.132	0.293	0.027	0.061	0.081	0.015	0.013	0.085	0.674	0.637	0.458	0.627	0.461	0.154	0.112	0.574	0.25	0.715	0.713	0.307	0.027	0.025	0.7	0.001	0.009	0.244	0.011	0.001	0
170	490	150	0.116	0.073	0.584	0.159	0.272	0.09	0.007	0.33	0.257	0.22	0.133	0.549	0.864	0.586	0.054	0.343	0.707	0.163	0.128	0.31	0.024	0.078	0.083	0.016	0.011	0.108	0.654	0.568	0.421	0.594	0.437	0.309	0.116	0.553	0.236	0.716	0.651	0.301	0.047	0.025	0.584	0.001	0.114	0.216	0.012	0	0
190	490	150	0.093	0.064	0.478	0.144	0.194	0.074	0.018	0.21	0.227	0.139	0.099	0.43	0.559	0.233	0.044	0.283	0.644	0.514	0.113	0.265	0.006	0.043	0.077	0.015	0.009	0.145	0.577	0.525	0.349	0.565	0.458	0.52	0.088	0.504	0.221	0.625	0.454	0.275	0.035	0.021	0.399	0.002	0.003	0.103	0.016	0	0
210	490	150	0.073	0.074	0.221	0.128	0.19	0.045	0.057	0.038	0.317	0.088	0.08	0.323	0.53	0.161	0.026	0.226	0.191	0.171	0.095	0.199	0.001	0.011	0.054	0.013	0.008	0.067	0.421	0.468	0.266	0.454	0.317	0.141	0.062	0.352	0.184	0.47	0.318	0.228	0.003	0.016	0.245	0.001	0.003	0.1	0.013	0	0
230	490	150	0.059	0.092	0.16	0.093	0.189	0.038	0.038	0.021	0.303	0.087	0.092	0.293	0.5	0.121	0.024	0.168	0.113	0.099	0.077	0.164	0.001	0.004	0.047	0.011	0.008	0.061	0.323	0.344	0.208	0.36	0.254	0.025	0.051	0.3	0.148	0.357	0.262	0.197	0.001	0.012	0.204	0.001	0.004	0.088	0.009	0	0
250	490	150	0.049	0.064	0.09	0.065	0.166	0.027	0.006	0.012	0.214	0.069	0.073	0.166	0.323	0.105	0.024	0.121	0.057	0.084	0.056	0.115	0.001	0.004	0.034	0.012	0.008	0.052	0.217	0.188	0.125	0.241	0.171	0.006	0.039	0.206	0.097	0.231	0.175	0.128	0.001	0.01	0.162	0.001	0.002	0.063	0.007	0	0
90	490	170	0.207	0.06	0.428	0.086	0.134	0.027	0.005	0.075	0.305	0.102	0.033	0.39	0.59	0.484	0.021	0.174	0.19	0.106	0.067	0.182	0.004	0.029	0.061	0.01	0.017	0.158	0.376	0.418	0.263	0.357	0.248	0.042	0.055	0.287	0.134	0.357	0.373	0.214	0.004	0.035	0.582	0.002	0.012	0.233	0.022	0.001	0
110	490	170	0.163	0.105	0.537	0.16	0.208	0.049	0.018	0.172	0.593	0.194	0.067	0.6	0.808	0.663	0.042	0.296	0.371	0.197	0.114	0.286	0.012	0.015	0.069	0.019	0.033	0.09	0.665	0.632	0.438	0.599	0.444	0.049	0.086	0.506	0.219	0.604	0.653	0.245	0.01	0.028	0.806	0.002	0.029	0.321	0.013	0	0.006
130	490	170	0.142	0.089	0.603	0.174	0.198	0.059	0.01	0.29	0.527	0.249	0.096	0.63	0.865	0.781	0.04	0.35	0.579	0.181	0.135	0.327	0.022	0.006	0.092	0.015	0.023	0.077	0.758	0.717	0.498	0.64	0.519	0.091	0.096	0.588	0.254	0.706	0.808	0.281	0.012	0.026	0.692	0.003	0.013	0.262	0.013	0	0
150	490	170	0.129	0.04	0.813	0.175	0.206	0.092	0.007	0.395	0.335	0.269	0.12	0.542	0.711	0.762	0.048	0.369	0.753	0.182	0.135	0.303	0.024	0.033	0.083	0.012	0.013	0.103	0.729	0.687	0.466	0.628	0.475	0.199	0.104	0.579	0.247	0.725	0.802	0.291	0.019	0.024	0.609	0.002	0.003	0.239	0.012	0.002	0
170	490	170	0.112	0.059	0.584	0.159	0.205	0.097	0.015	0.329	0.194	0.19	0.103	0.486	0.602	0.381	0.049	0.319	0.687	0.169	0.12	0.283	0.014	0.033	0.08	0.013	0.011	0.107	0.632	0.557	0.396	0.553	0.431	0.5	0.092	0.557	0.227	0.671	0.588	0.293	0.049	0.021	0.417	0.001	0.004	0.126	0.014	0	0
190	490	170	0.088	0.044	0.217	0.111	0.19	0.039	0.052	0.057	0.191	0.087	0.06	0.294	0.335	0.104	0.026	0.213	0.227	0.161	0.078	0.18	0.001	0.012	0.052	0.014	0.009	0.078	0.38	0.387	0.24	0.409	0.294	0.167	0.058	0.351	0.161	0.44	0.302	0.186	0.006	0.018	0.217	0.001	0.01	0.064	0.013	0	0
210	490	170	0.072	0.036	0.129	0.12	0.184	0.03	0.052	0.031	0.18	0.094	0.075	0.254	0.345	0.105	0.027	0.179	0.116	0.109	0.074	0.143	0.001	0.007	0.041	0.014	0.01	0.061	0.289	0.374	0.183	0.313	0.217	0.039	0.046	0.259	0.133	0.322	0.222	0.164	0.002	0.016	0.151	0.001	0.004	0.075	0.015	0	0
230	490	170	0.061	0.033	0.1	0.092	0.181	0.028	0.05	0.039	0.129	0.085	0.073	0.231	0.314	0.127	0.03	0.153	0.113	0.098	0.072	0.134	0.001	0.01	0.036	0.014	0.011	0.057	0.251	0.291	0.156	0.296	0.192	0.016	0.04	0.226	0.12	0.287	0.197	0.159	0.004	0.014	0.126	0.001	0.003	0.082	0.014	0	0
250	490	170	0.053	0.034	0.083	0.086	0.179	0.027	0.087	0.054	0.09	0.083	0.07	0.189	0.271	0.156	0.025	0.133	0.141	0.095	0.061	0.129	0.001	0.006	0.032	0.013	0.011	0.055	0.224	0.207	0.133	0.242	0.172	0.007	0.038	0.189	0.1	0.256	0.194	0.136	0.005	0.015	0.084	0.001	0.002	0.094	0.014	0	0
270	490	170	0.046	0.024	0.045	0.069	0.182	0.025	0.062	0.059	0.037	0.072	0.055	0.112	0.221	0.154	0.024	0.116	0.133	0.118	0.051	0.105	0.002	0.005	0.022	0.019	0.011	0.053	0.178	0.176	0.11	0.216	0.137	0.006	0.035	0.151	0.081	0.208	0.165	0.108	0.004	0.014	0.025	0.001	0.002	0.064	0.014	0	0
90	490	190	0.204	0.184	0.588	0.137	0.186	0.045	0.011	0.118	0.463	0.19	0.055	0.571	0.717	0.637	0.028	0.26	0.33	0.126	0.098	0.246	0.01	0.08	0.062	0.013	0.025	0.101	0.566	0.591	0.368	0.541	0.391	0.046	0.076	0.479	0.196	0.525	0.675	0.193	0.006	0.033	0.829	0.004	0.033	0.322	0.017	0.001	0.004
110	490	190	0.161	0.21	0.582	0.218	0.218	0.052	0.014	0.151	0.577	0.281	0.073	0.629	0.696	0.736	0.04	0.313	0.504	0.128	0.122	0.298	0.022	0.057	0.081	0.017	0.033	0.092	0.705	0.664	0.469	0.633	0.499	0.103	0.098	0.576	0.238	0.681	0.753	0.242	0.009	0.024	0.716	0.002	0.012	0.287	0.011	0	0
130	490	190	0.154	0.079	0.715	0.169	0.203	0.072	0.006	0.32	0.492	0.231	0.092	0.606	1	0.9	0.039	0.34	0.668	0.132	0.126	0.3	0.032	0.021	0.081	0.013	0.017	0.092	0.73	0.723	0.481	0.65	0.503	0.209	0.099	0.573	0.247	0.68	0.88	0.253	0.027	0.024	0.587	0.001	0.003	0.249	0.012	0	0
150	490	190	0.14	0.041	0.727	0.187	0.213	0.093	0.01	0.371	0.291	0.199	0.097	0.479	0.743	0.57	0.04	0.317	0.747	0.311	0.118	0.279	0.021	0.014	0.08	0.012	0.013	0.103	0.66	0.602	0.41	0.548	0.461	0.491	0.087	0.54	0.231	0.65	0.701	0.269	0.046	0.023	0.492	0.001	0.003	0.153	0.014	0	0
170	490	190	0.121	0.041	0.296	0.131	0.205	0.056	0.03	0.103	0.148	0.102	0.064	0.335	0.321	0.117	0.024	0.206	0.322	0.298	0.084	0.185	0.004	0.018	0.059	0.013	0.011	0.098	0.431	0.414	0.272	0.393	0.317	0.327	0.057	0.395	0.167	0.429	0.348	0.185	0.013	0.019	0.259	0.001	0.002	0.064	0.014	0	0
190	490	190	0.094	0.043	0.097	0.115	0.198	0.03	0.089	0.065	0.113	0.104	0.069	0.275	0.266	0.094	0.026	0.187	0.138	0.101	0.078	0.155	0.001	0.005	0.041	0.015	0.009	0.063	0.301	0.356	0.206	0.3	0.224	0.054	0.044	0.28	0.13	0.333	0.232	0.149	0.004	0.019	0.146	0.001	0.003	0.065	0.021	0.003	0
210	490	190	0.075	0.034	0.066	0.124	0.202	0.031	0.174	0.106	0.081	0.113	0.083	0.276	0.245	0.122	0.03	0.189	0.186	0.106	0.075	0.156	0.001	0.009	0.039	0.019	0.013	0.062	0.291	0.399	0.189	0.319	0.234	0.023	0.042	0.259	0.135	0.337	0.229	0.146	0.004	0.02	0.083	0.002	0.003	0.097	0.025	0	0
230	490	190	0.07	0.021	0.056	0.147	0.204	0.038	0.175	0.114	0.049	0.147	0.111	0.273	0.259	0.173	0.082	0.176	0.222	0.113	0.069	0.155	0.003	0.059	0.035	0.044	0.044	0.081	0.294	0.341	0.174	0.315	0.238	0.022	0.045	0.237	0.167	0.337	0.231	0.154	0.006	0.02	0.047	0.006	0.005	0.13	0.027	0	0
250	490	190	0.066	0.019	0.078	0.125	0.214	0.034	0.164	0.118	0.044	0.12	0.091	0.249	0.273	0.308	0.062	0.152	0.235	0.097	0.061	0.149	0.003	0.018	0.03	0.021	0.031	0.058	0.274	0.26	0.151	0.31	0.208	0.018	0.04	0.215	0.141	0.307	0.262	0.147	0.009	0.018	0.06	0.002	0.003	0.143	0.02	0	0
270	490	190	0.057	0.019	0.126	0.09	0.203	0.032	0.09	0.138	0.059	0.088	0.079	0.21	0.33	0.56	0.029	0.124	0.232	0.082	0.052	0.15	0.003	0.006	0.024	0.019	0.018	0.047	0.221	0.226	0.124	0.296	0.166	0.01	0.034	0.185	0.1	0.252	0.345	0.133	0.01	0.015	0.093	0.001	0.003	0.121	0.014	0.006	0
290	490	190	0.046	0.02	0.058	0.059	0.183	0.027	0.027	0.09	0.04	0.062	0.057	0.08	0.197	0.246	0.026	0.126	0.122	0.102	0.043	0.106	0.002	0.003	0.017	0.013	0.013	0.042	0.158	0.158	0.118	0.232	0.131	0.004	0.032	0.147	0.076	0.187	0.203	0.123	0.006	0.012	0.032	0.002	0.004	0.039	0.012	0.001	0
70	490	210	0.196	0.132	0.469	0.094	0.135	0.028	0.003	0.088	0.286	0.106	0.043	0.438	0.8	0.515	0.02	0.179	0.186	0.113	0.072	0.169	0.005	0.03	0.043	0.01	0.012	0.097	0.431	0.573	0.281	0.4	0.3	0.028	0.056	0.366	0.155	0.36	0.485	0.136	0.012	0.03	0.656	0.001	0.025	0.253	0.009	0.005	0.001
90	490	210	0.181	0.232	0.67	0.156	0.195	0.047	0.009	0.165	0.56	0.184	0.067	0.607	0.807	0.693	0.035	0.265	0.411	0.103	0.105	0.267	0.018	0.138	0.055	0.011	0.02	0.068	0.628	0.576	0.408	0.57	0.46	0.053	0.09	0.506	0.22	0.573	0.801	0.207	0.036	0.037	0.874	0.002	0.034	0.273	0.03	0.001	0.002
110	490	210	0.179	0.176	0.616	0.298	0.191	0.061	0.015	0.236	0.444	0.201	0.071	0.623	0.743	0.938	0.044	0.314	0.607	0.179	0.119	0.312	0.033	0.067	0.076	0.014	0.019	0.082	0.682	0.61	0.464	0.566	0.525	0.129	0.085	0.554	0.238	0.641	0.773	0.258	0.052	0.024	0.795	0.001	0.004	0.268	0.01	0.001	0
130	490	210	0.174	0.057	0.745	0.175	0.231	0.086	0.026	0.306	0.383	0.173	0.073	0.552	0.706	0.601	0.037	0.303	0.715	0.403	0.116	0.296	0.017	0.04	0.088	0.03	0.015	0.13	0.641	0.63	0.421	0.529	0.461	0.501	0.094	0.528	0.226	0.63	0.682	0.238	0.028	0.025	0.589	0.001	0.002	0.191	0.012	0	0
150	490	210	0.156	0.046	0.301	0.134	0.249	0.055	0.046	0.125	0.183	0.11	0.059	0.365	0.299	0.135	0.025	0.217	0.405	0.241	0.116	0.193	0.004	0.011	0.061	0.012	0.017	0.113	0.452	0.452	0.301	0.418	0.374	0.384	0.066	0.403	0.171	0.433	0.364	0.191	0.02	0.025	0.263	0.002	0.004	0.091	0.014	0.002	0
170	490	210	0.135	0.041	0.071	0.132	0.22	0.039	0.169	0.101	0.081	0.114	0.067	0.324	0.218	0.093	0.025	0.188	0.199	0.093	0.191	0.17	0.001	0.008	0.044	0.016	0.038	0.071	0.332	0.38	0.223	0.347	0.232	0.055	0.09	0.301	0.133	0.345	0.251	0.152	0.007	0.022	0.103	0.002	0.003	0.071	0.024	0.005	0
190	490	210	0.104	0.031	0.039	0.143	0.227	0.054	0.218	0.109	0.039	0.119	0.077	0.281	0.207	0.12	0.028	0.204	0.225	0.111	0.121	0.181	0.001	0.005	0.04	0.022	0.027	0.067	0.338	0.412	0.211	0.375	0.254	0.038	0.075	0.31	0.147	0.391	0.261	0.158	0.009	0.021	0.037	0.002	0.004	0.073	0.034	0.019	0
210	490	210	0.089	0.02	0.045	0.162	0.229	0.061	0.233	0.085	0.038	0.116	0.116	0.274	0.228	0.21	0.038	0.198	0.222	0.125	0.076	0.176	0.002	0.012	0.039	0.036	0.031	0.067	0.324	0.444	0.191	0.364	0.257	0.032	0.054	0.274	0.152	0.382	0.258	0.159	0.01	0.024	0.037	0.002	0.004	0.086	0.038	0.001	0
230	490	210	0.084	0.02	0.046	0.166	0.248	0.046	0.207	0.071	0.036	0.15	0.131	0.268	0.228	0.208	0.07	0.17	0.21	0.126	0.066	0.161	0.003	0.021	0.038	0.048	0.051	0.061	0.298	0.344	0.167	0.341	0.247	0.032	0.049	0.236	0.149	0.34	0.243	0.151	0.007	0.022	0.027	0.009	0.004	0.095	0.037	0	0
250	490	210	0.072	0.017	0.079	0.126	0.249	0.036	0.174	0.075	0.03	0.11	0.087	0.234	0.246	0.37	0.056	0.143	0.217	0.101	0.057	0.144	0.004	0.011	0.03	0.026	0.042	0.053	0.262	0.256	0.137	0.31	0.203	0.026	0.042	0.206	0.119	0.296	0.261	0.14	0.009	0.021	0.051	0.002	0.003	0.113	0.024	0	0
270	490	210	0.062	0.017	0.141	0.097	0.207	0.037	0.127	0.128	0.046	0.086	0.075	0.211	0.294	0.495	0.035	0.118	0.246	0.097	0.05	0.135	0.006	0.006	0.023	0.021	0.025	0.047	0.215	0.216	0.11	0.273	0.161	0.015	0.035	0.175	0.097	0.243	0.304	0.128	0.013	0.017	0.091	0.002	0.003	0.125	0.017	0.001	0
290	490	210	0.051	0.02	0.093	0.069	0.189	0.036	0.084	0.098	0.048	0.061	0.06	0.111	0.223	0.246	0.023	0.111	0.156	0.123	0.045	0.124	0.004	0.005	0.019	0.015	0.023	0.041	0.168	0.18	0.098	0.236	0.13	0.009	0.031	0.15	0.082	0.199	0.216	0.109	0.011	0.018	0.059	0.008	0.085	0.056	0.017	0.003	0
70	490	230	0.188	0.099	0.522	0.114	0.138	0.032	0.002	0.107	0.414	0.114	0.048	0.49	0.808	0.657	0.023	0.212	0.239	0.136	0.088	0.197	0.008	0.032	0.039	0.01	0.012	0.168	0.521	0.622	0.352	0.482	0.393	0.021	0.072	0.436	0.187	0.439	0.586	0.159	0.051	0.024	0.796	0.003	0.029	0.258	0.01	0	0.005
90	490	230	0.186	0.088	0.654	0.218	0.166	0.059	0.005	0.171	0.679	0.174	0.064	0.606	0.819	0.68	0.036	0.27	0.531	0.136	0.107	0.26	0.046	0.15	0.054	0.009	0.014	0.101	0.653	0.622	0.445	0.558	0.48	0.094	0.102	0.532	0.23	0.597	0.774	0.233	0.109	0.058	0.896	0.004	0.023	0.28	0.014	0.006	0
110	490	230	0.194	0.129	0.515	0.277	0.192	0.078	0.018	0.286	0.505	0.152	0.056	0.574	0.689	0.545	0.033	0.289	0.675	0.236	0.107	0.279	0.02	0.036	0.068	0.01	0.016	0.15	0.644	0.571	0.42	0.53	0.488	0.506	0.088	0.536	0.225	0.587	0.615	0.243	0.059	0.044	0.766	0.001	0.004	0.178	0.009	0.001	0
130	490	230	0.171	0.052	0.298	0.142	0.223	0.054	0.063	0.127	0.184	0.093	0.043	0.404	0.333	0.149	0.023	0.208	0.407	0.196	0.129	0.207	0.003	0.021	0.058	0.019	0.016	0.19	0.448	0.491	0.298	0.402	0.363	0.391	0.074	0.417	0.17	0.413	0.383	0.17	0.023	0.03	0.362	0.001	0.002	0.124	0.013	0	0
150	490	230	0.137	0.041	0.082	0.138	0.222	0.067	0.272	0.142	0.074	0.105	0.058	0.367	0.181	0.074	0.027	0.193	0.258	0.095	0.271	0.172	0.001	0.005	0.047	0.014	0.053	0.073	0.334	0.374	0.23	0.329	0.248	0.066	0.095	0.326	0.132	0.331	0.256	0.136	0.015	0.024	0.113	0.005	0.005	0.109	0.02	0.014	0
170	490	230	0.115	0.037	0.035	0.145	0.226	0.072	0.308	0.13	0.032	0.113	0.067	0.313	0.18	0.098	0.024	0.194	0.247	0.094	0.17	0.173	0.001	0.003	0.044	0.015	0.056	0.064	0.322	0.381	0.201	0.332	0.237	0.047	0.105	0.304	0.14	0.357	0.245	0.15	0.012	0.025	0.031	0.002	0.005	0.041	0.039	0.027	0
190	490	230	0.094	0.019	0.026	0.139	0.199	0.064	0.286	0.076	0.02	0.113	0.071	0.259	0.183	0.119	0.026	0.202	0.184	0.114	0.09	0.168	0.001	0.002	0.037	0.022	0.018	0.064	0.332	0.421	0.199	0.365	0.265	0.047	0.055	0.31	0.151	0.395	0.261	0.168	0.004	0.025	0.012	0.002	0.009	0.085	0.047	0.01	0
210	490	230	0.084	0.02	0.027	0.171	0.211	0.053	0.313	0.068	0.021	0.11	0.096	0.249	0.19	0.157	0.038	0.187	0.171	0.137	0.073	0.161	0.001	0.005	0.038	0.029	0.034	0.066	0.31	0.435	0.179	0.349	0.258	0.035	0.051	0.273	0.145	0.361	0.251	0.161	0.004	0.027	0.014	0.002	0.006	0.074	0.037	0.002	0
230	490	230	0.079	0.018	0.034	0.134	0.227	0.04	0.327	0.039	0.024	0.107	0.098	0.234	0.191	0.199	0.059	0.149	0.161	0.121	0.059	0.138	0.001	0.009	0.035	0.028	0.059	0.057	0.258	0.29	0.142	0.3	0.209	0.029	0.045	0.214	0.118	0.299	0.22	0.133	0.003	0.021	0.015	0.002	0.004	0.055	0.032	0.004	0.001
250	490	230	0.069	0.017	0.047	0.112	0.209	0.043	0.311	0.036	0.028	0.092	0.08	0.205	0.191	0.255	0.063	0.126	0.154	0.114	0.052	0.124	0.002	0.007	0.027	0.03	0.068	0.048	0.227	0.223	0.113	0.26	0.175	0.025	0.04	0.183	0.101	0.254	0.207	0.12	0.004	0.018	0.021	0.002	0.003	0.052	0.025	0.002	0
270	490	230	0.058	0.018	0.074	0.104	0.198	0.053	0.263	0.056	0.03	0.078	0.068	0.171	0.198	0.327	0.058	0.106	0.176	0.122	0.046	0.11	0.002	0.006	0.021	0.034	0.063	0.041	0.194	0.196	0.093	0.23	0.151	0.018	0.035	0.157	0.086	0.214	0.209	0.108	0.007	0.018	0.034	0.002	0.002	0.062	0.02	0.002	0
290	490	230	0.048	0.021	0.057	0.077	0.183	0.054	0.235	0.057	0.039	0.061	0.06	0.095	0.145	0.182	0.029	0.088	0.139	0.171	0.04	0.094	0.005	0.004	0.016	0.02	0.037	0.033	0.155	0.163	0.078	0.201	0.125	0.011	0.033	0.137	0.074	0.179	0.157	0.094	0.012	0.015	0.024	0.002	0.024	0.073	0.014	0.006	0
310	490	230	0.041	0.025	0.018	0.045	0.167	0.024	0.205	0.017	0.021	0.047	0.049	0.034	0.092	0.089	0.015	0.08	0.089	0.304	0.031	0.073	0.003	0.002	0.011	0.006	0.017	0.023	0.115	0.126	0.061	0.163	0.097	0.006	0.023	0.107	0.059	0.128	0.104	0.072	0.004	0.009	0.002	0.001	0.004	0.072	0.013	0	0
50	490	250	0.121	0.047	0.155	0.045	0.079	0.01	0.001	0.052	0.139	0.03	0.011	0.172	0.25	0.117	0.007	0.073	0.047	0.108	0.031	0.083	0.001	0.007	0.015	0.004	0.005	0.024	0.187	0.337	0.13	0.184	0.144	0.005	0.028	0.19	0.072	0.143	0.135	0.054	0.011	0.008	0.243	0.001	0.008	0.035	0.007	0	0.001
70	490	250	0.176	0.081	0.391	0.129	0.135	0.039	0.004	0.107	0.392	0.096	0.046	0.494	0.677	0.6	0.028	0.197	0.267	0.189	0.084	0.225	0.013	0.039	0.055	0.015	0.011	0.098	0.501	0.551	0.368	0.426	0.377	0.048	0.071	0.419	0.179	0.449	0.427	0.162	0.061	0.018	0.806	0.003	0.105	0.231	0.028	0.002	0.017
90	490	250	0.212	0.074	0.522	0.204	0.178	0.073	0.009	0.191	0.599	0.162	0.051	0.588	0.739	0.506	0.037	0.247	0.617	0.259	0.099	0.303	0.015	0.045	0.061	0.009	0.014	0.097	0.634	0.592	0.41	0.487	0.432	0.46	0.086	0.539	0.213	0.529	0.54	0.216	0.155	0.03	0.851	0.001	0.029	0.219	0.018	0.005	0
110	490	250	0.189	0.091	0.281	0.205	0.207	0.057	0.044	0.128	0.253	0.092	0.032	0.395	0.406	0.153	0.023	0.197	0.441	0.665	0.101	0.188	0.006	0.011	0.05	0.007	0.018	0.133	0.489	0.434	0.284	0.396	0.35	0.41	0.067	0.434	0.173	0.413	0.359	0.162	0.045	0.021	0.435	0.001	0.002	0.098	0.011	0.001	0
130	490	250	0.141	0.037	0.075	0.128	0.213	0.072	0.201	0.091	0.075	0.068	0.035	0.331	0.155	0.058	0.02	0.155	0.2	0.096	0.277	0.136	0.001	0.004	0.043	0.018	0.036	0.08	0.319	0.417	0.196	0.301	0.228	0.077	0.075	0.309	0.128	0.279	0.229	0.124	0.02	0.024	0.101	0.001	0.003	0.097	0.027	0.01	0.001
150	490	250	0.114	0.024	0.028	0.138	0.232	0.079	0.29	0.102	0.025	0.093	0.05	0.304	0.134	0.073	0.022	0.175	0.201	0.093	0.264	0.143	0.002	0.002	0.052	0.009	0.059	0.058	0.301	0.336	0.188	0.291	0.224	0.042	0.091	0.303	0.161	0.307	0.231	0.122	0.014	0.025	0.021	0.002	0.005	0.037	0.033	0.048	0
170	490	250	0.107	0.016	0.019	0.125	0.205	0.08	0.357	0.053	0.014	0.095	0.054	0.252	0.144	0.084	0.027	0.173	0.157	0.093	0.124	0.142	0.001	0.002	0.037	0.011	0.024	0.056	0.289	0.338	0.17	0.292	0.22	0.049	0.05	0.286	0.14	0.317	0.221	0.126	0.012	0.025	0.009	0.002	0.006	0.009	0.043	0.044	0
190	490	250	0.09	0.013	0.019	0.114	0.198	0.073	0.511	0.034	0.014	0.086	0.059	0.229	0.149	0.112	0.029	0.165	0.152	0.099	0.077	0.139	0.001	0.002	0.036	0.021	0.025	0.056	0.271	0.346	0.152	0.296	0.221	0.043	0.046	0.265	0.122	0.303	0.212	0.13	0.007	0.023	0.004	0.002	0.01	0.015	0.048	0.054	0
210	490	250	0.074	0.013	0.02	0.121	0.208	0.051	0.533	0.029	0.015	0.09	0.078	0.232	0.169	0.148	0.042	0.151	0.149	0.117	0.063	0.132	0.001	0.003	0.034	0.027	0.046	0.059	0.247	0.377	0.13	0.277	0.211	0.032	0.043	0.223	0.114	0.285	0.2	0.124	0.003	0.024	0.006	0.002	0.005	0.02	0.038	0.091	0
230	490	250	0.068	0.015	0.021	0.11	0.214	0.045	0.522	0.025	0.016	0.086	0.074	0.218	0.17	0.178	0.048	0.131	0.123	0.122	0.054	0.122	0.001	0.005	0.029	0.029	0.073	0.051	0.222	0.262	0.112	0.25	0.184	0.03	0.041	0.193	0.102	0.252	0.177	0.114	0.002	0.018	0.009	0.002	0.002	0.022	0.032	0.047	0
250	490	250	0.062	0.016	0.024	0.111	0.202	0.047	0.447	0.019	0.016	0.075	0.062	0.188	0.16	0.214	0.053	0.112	0.121	0.128	0.048	0.108	0.001	0.004	0.024	0.033	0.092	0.042	0.196	0.201	0.095	0.229	0.158	0.021	0.035	0.166	0.088	0.219	0.16	0.103	0.002	0.018	0.013	0.002	0.002	0.027	0.024	0.005	0
270	490	250	0.052	0.016	0.031	0.108	0.197	0.063	0.359	0.024	0.018	0.071	0.06	0.16	0.157	0.243	0.052	0.099	0.135	0.138	0.043	0.103	0.002	0.004	0.022	0.038	0.095	0.034	0.175	0.18	0.081	0.212	0.138	0.015	0.031	0.147	0.079	0.194	0.15	0.096	0.005	0.014	0.02	0.001	0.003	0.039	0.018	0.001	0
290	490	250	0.043	0.018	0.029	0.078	0.187	0.054	0.265	0.028	0.024	0.057	0.053	0.089	0.12	0.154	0.03	0.108	0.12	0.188	0.037	0.093	0.003	0.004	0.015	0.021	0.056	0.03	0.147	0.152	0.069	0.188	0.116	0.009	0.03	0.133	0.072	0.167	0.129	0.087	0.009	0.014	0.013	0.001	0.019	0.07	0.015	0	0
310	490	250	0.037	0.023	0.015	0.045	0.166	0.02	0.178	0.012	0.014	0.045	0.043	0.033	0.077	0.08	0.014	0.106	0.078	0.303	0.03	0.071	0.002	0.002	0.011	0.006	0.019	0.023	0.112	0.124	0.056	0.156	0.09	0.005	0.021	0.103	0.057	0.125	0.096	0.069	0.002	0.007	0.004	0.001	0.001	0.073	0.011	0	0
50	490	270	0.133	0.058	0.133	0.044	0.081	0.009	0.001	0.05	0.176	0.028	0.012	0.177	0.32	0.078	0.011	0.066	0.043	0.087	0.029	0.071	0.002	0.006	0.015	0.003	0.006	0.033	0.177	0.319	0.112	0.172	0.127	0.003	0.028	0.197	0.067	0.136	0.118	0.047	0.005	0.012	0.229	0.001	0.003	0.017	0.009	0	0
70	490	270	0.155	0.065	0.259	0.12	0.119	0.038	0.003	0.081	0.304	0.072	0.039	0.422	0.622	0.404	0.024	0.162	0.248	0.173	0.076	0.205	0.01	0.034	0.034	0.01	0.01	0.055	0.426	0.449	0.3	0.371	0.294	0.109	0.061	0.37	0.142	0.329	0.304	0.134	0.045	0.022	0.698	0.004	0.032	0.146	0.014	0	0.005
90	490	270	0.169	0.068	0.301	0.171	0.159	0.047	0.017	0.123	0.311	0.071	0.029	0.414	0.478	0.163	0.023	0.168	0.44	0.494	0.075	0.18	0.004	0.033	0.053	0.006	0.015	0.061	0.452	0.39	0.276	0.347	0.33	0.483	0.063	0.412	0.149	0.347	0.319	0.138	0.043	0.021	0.545	0.002	0.004	0.106	0.011	0	0.002
110	490	270	0.148	0.051	0.077	0.138	0.177	0.036	0.06	0.053	0.096	0.048	0.02	0.276	0.172	0.052	0.014	0.129	0.162	0.243	0.087	0.115	0.001	0.003	0.037	0.005	0.022	0.066	0.29	0.295	0.167	0.256	0.219	0.119	0.052	0.284	0.105	0.232	0.19	0.096	0.017	0.025	0.126	0.001	0.001	0.098	0.032	0.009	0
130	490	270	0.116	0.034	0.027	0.091	0.197	0.049	0.321	0.062	0.038	0.064	0.032	0.294	0.1	0.054	0.015	0.151	0.133	0.08	0.113	0.124	0.002	0.001	0.049	0.011	0.026	0.07	0.291	0.392	0.165	0.28	0.207	0.039	0.055	0.274	0.11	0.254	0.189	0.098	0.013	0.028	0.013	0.001	0.003	0.056	0.043	0.074	0
150	490	270	0.104	0.016	0.016	0.096	0.203	0.04	0.423	0.03	0.019	0.076	0.043	0.264	0.123	0.071	0.017	0.158	0.127	0.087	0.068	0.126	0.001	0.001	0.052	0.007	0.017	0.05	0.286	0.309	0.16	0.286	0.214	0.052	0.041	0.289	0.118	0.285	0.204	0.108	0.005	0.024	0.002	0.001	0.003	0.003	0.062	0.159	0
170	490	270	0.106	0.013	0.016	0.096	0.208	0.035	0.49	0.019	0.013	0.076	0.047	0.235	0.136	0.089	0.026	0.159	0.115	0.09	0.07	0.129	0.001	0.001	0.031	0.01	0.016	0.053	0.267	0.297	0.141	0.259	0.199	0.042	0.038	0.269	0.111	0.284	0.197	0.112	0.004	0.024	0.002	0.002	0.004	0.003	0.05	0.221	0
190	490	270	0.086	0.013	0.016	0.103	0.213	0.039	0.572	0.016	0.013	0.079	0.053	0.238	0.143	0.112	0.053	0.145	0.115	0.101	0.062	0.132	0.001	0.002	0.03	0.026	0.034	0.057	0.249	0.306	0.123	0.248	0.19	0.031	0.041	0.24	0.106	0.267	0.176	0.111	0.002	0.024	0.003	0.002	0.003	0.004	0.039	0.113	0
210	490	270	0.075	0.014	0.017	0.114	0.211	0.044	0.55	0.017	0.013	0.086	0.068	0.232	0.153	0.133	0.058	0.127	0.117	0.117	0.057	0.121	0.001	0.007	0.032	0.032	0.066	0.053	0.231	0.347	0.104	0.241	0.182	0.029	0.044	0.2	0.101	0.236	0.17	0.109	0.003	0.021	0.006	0.002	0.003	0.009	0.036	0.069	0
230	490	270	0.068	0.014	0.017	0.114	0.218	0.043	0.508	0.019	0.014	0.074	0.059	0.198	0.142	0.156	0.044	0.117	0.113	0.128	0.05	0.114	0.001	0.005	0.026	0.036	0.073	0.046	0.198	0.234	0.091	0.217	0.162	0.022	0.037	0.172	0.092	0.226	0.156	0.108	0.002	0.018	0.008	0.001	0.002	0.015	0.028	0.012	0
250	490	270	0.056	0.015	0.019	0.115	0.21	0.04	0.425	0.014	0.014	0.066	0.052	0.163	0.135	0.162	0.042	0.111	0.104	0.147	0.044	0.108	0.001	0.003	0.023	0.034	0.076	0.037	0.172	0.18	0.081	0.206	0.146	0.018	0.031	0.153	0.082	0.2	0.144	0.105	0.002	0.016	0.01	0.001	0.002	0.019	0.022	0.004	0
270	490	270	0.05	0.016	0.024	0.101	0.204	0.044	0.331	0.018	0.017	0.06	0.049	0.141	0.138	0.167	0.034	0.099	0.11	0.149	0.04	0.102	0.001	0.003	0.02	0.031	0.074	0.034	0.157	0.163	0.072	0.2	0.127	0.012	0.028	0.137	0.075	0.183	0.138	0.108	0.003	0.014	0.015	0.001	0.003	0.024	0.017	0.005	0
290	490	270	0.042	0.017	0.022	0.065	0.19	0.031	0.192	0.021	0.023	0.048	0.043	0.071	0.112	0.118	0.021	0.131	0.085	0.166	0.034	0.084	0.001	0.002	0.013	0.017	0.048	0.026	0.127	0.14	0.061	0.176	0.103	0.006	0.022	0.119	0.074	0.149	0.111	0.089	0.007	0.012	0.012	0.001	0.013	0.042	0.011	0	0
310	490	270	0.039	0.02	0.013	0.041	0.17	0.017	0.133	0.01	0.012	0.04	0.04	0.031	0.074	0.074	0.012	0.201	0.054	0.188	0.028	0.066	0.001	0.001	0.009	0.006	0.02	0.02	0.103	0.116	0.05	0.149	0.082	0.004	0.018	0.097	0.073	0.12	0.088	0.068	0.001	0.007	0.001	0.001	0.003	0.06	0.01	0	0
50	490	290	0.082	0.048	0.075	0.043	0.048	0.007	0.002	0.025	0.085	0.02	0.015	0.129	0.241	0.066	0.011	0.049	0.028	0.062	0.021	0.056	0.003	0.008	0.016	0.004	0.006	0.031	0.14	0.131	0.07	0.127	0.085	0.004	0.023	0.131	0.052	0.087	0.082	0.034	0.004	0.012	0.182	0.002	0.007	0.006	0.014	0	0
70	490	290	0.109	0.051	0.138	0.123	0.084	0.023	0.009	0.043	0.144	0.044	0.027	0.297	0.348	0.162	0.015	0.121	0.164	0.137	0.051	0.115	0.002	0.024	0.028	0.008	0.011	0.038	0.293	0.243	0.195	0.23	0.173	0.151	0.044	0.239	0.091	0.189	0.162	0.092	0.011	0.028	0.521	0.001	0.03	0.054	0.017	0	0.001
90	490	290	0.146	0.043	0.082	0.125	0.14	0.018	0.054	0.052	0.143	0.034	0.014	0.25	0.18	0.044	0.013	0.095	0.152	0.252	0.043	0.084	0.002	0.007	0.025	0.003	0.016	0.042	0.219	0.196	0.14	0.186	0.15	0.227	0.033	0.217	0.074	0.153	0.126	0.074	0.018	0.02	0.201	0.002	0.006	0.051	0.012	0.001	0
110	490	290	0.109	0.025	0.028	0.062	0.157	0.018	0.089	0.023	0.045	0.035	0.014	0.215	0.105	0.033	0.012	0.088	0.059	0.081	0.039	0.076	0.001	0.001	0.023	0.003	0.02	0.085	0.165	0.19	0.115	0.17	0.132	0.019	0.027	0.181	0.06	0.125	0.098	0.052	0.014	0.021	0.035	0.001	0.001	0.041	0.016	0.033	0
130	490	290	0.1	0.022	0.018	0.074	0.195	0.047	0.578	0.033	0.025	0.05	0.029	0.298	0.092	0.056	0.014	0.14	0.123	0.082	0.05	0.104	0.002	0.001	0.037	0.005	0.016	0.061	0.225	0.314	0.141	0.235	0.183	0.03	0.032	0.239	0.087	0.204	0.139	0.081	0.008	0.029	0.003	0.001	0.003	0.02	0.043	0.258	0
150	490	290	0.095	0.013	0.014	0.092	0.186	0.044	0.733	0.013	0.014	0.063	0.036	0.272	0.106	0.073	0.016	0.139	0.12	0.078	0.052	0.109	0.001	0.002	0.039	0.009	0.016	0.049	0.229	0.267	0.129	0.247	0.177	0.028	0.033	0.248	0.092	0.229	0.151	0.093	0	0.021	0.001	0.001	0.003	0.001	0.049	0.405	0
170	490	290	0.094	0.014	0.014	0.082	0.194	0.028	0.704	0.011	0.016	0.064	0.04	0.232	0.117	0.087	0.017	0.143	0.089	0.089	0.053	0.118	0.002	0.001	0.027	0.014	0.012	0.052	0.228	0.272	0.118	0.245	0.174	0.027	0.034	0.237	0.093	0.237	0.158	0.101	0.001	0.021	0.001	0.001	0.018	0.001	0.042	0.384	0
190	490	290	0.083	0.014	0.014	0.082	0.194	0.027	0.619	0.009	0.012	0.062	0.044	0.193	0.127	0.102	0.031	0.124	0.081	0.1	0.051	0.121	0.001	0.002	0.023	0.024	0.023	0.053	0.214	0.277	0.107	0.257	0.174	0.026	0.036	0.215	0.09	0.226	0.155	0.099	0.001	0.018	0.003	0.002	0.018	0.003	0.042	0.135	0
210	490	290	0.067	0.014	0.014	0.098	0.194	0.03	0.469	0.011	0.011	0.07	0.051	0.186	0.13	0.111	0.062	0.114	0.09	0.129	0.048	0.12	0.001	0.004	0.028	0.032	0.045	0.05	0.2	0.309	0.092	0.213	0.162	0.021	0.037	0.178	0.087	0.204	0.147	0.103	0.002	0.018	0.006	0.003	0.004	0.006	0.033	0.025	0
230	490	290	0.062	0.013	0.014	0.102	0.204	0.029	0.416	0.014	0.012	0.064	0.049	0.17	0.128	0.124	0.047	0.106	0.094	0.151	0.044	0.133	0.001	0.003	0.025	0.028	0.06	0.042	0.173	0.21	0.08	0.201	0.149	0.017	0.031	0.153	0.081	0.201	0.164	0.138	0.002	0.015	0.008	0.001	0.001	0.014	0.024	0.006	0
250	490	290	0.054	0.017	0.014	0.099	0.195	0.027	0.311	0.011	0.018	0.06	0.053	0.14	0.129	0.124	0.032	0.097	0.092	0.162	0.041	0.143	0.001	0.003	0.019	0.029	0.086	0.035	0.154	0.155	0.072	0.189	0.132	0.013	0.026	0.137	0.073	0.18	0.175	0.178	0.002	0.014	0.01	0.001	0.002	0.027	0.018	0.008	0
270	490	290	0.046	0.023	0.013	0.104	0.187	0.026	0.236	0.011	0.022	0.054	0.047	0.116	0.119	0.11	0.022	0.093	0.09	0.159	0.037	0.142	0.001	0.002	0.017	0.03	0.08	0.028	0.142	0.147	0.065	0.186	0.116	0.011	0.024	0.128	0.071	0.164	0.16	0.154	0.006	0.013	0.008	0.001	0.002	0.029	0.016	0.02	0
290	490	290	0.038	0.023	0.012	0.073	0.184	0.018	0.126	0.009	0.028	0.047	0.041	0.065	0.098	0.092	0.017	0.107	0.068	0.173	0.03	0.104	0.001	0.001	0.013	0.02	0.058	0.024	0.115	0.126	0.056	0.162	0.092	0.007	0.019	0.104	0.076	0.135	0.115	0.108	0.007	0.008	0.009	0.003	0.004	0.022	0.011	0	0
310	490	290	0.036	0.024	0.01	0.038	0.172	0.012	0.057	0.006	0.012	0.037	0.036	0.027	0.068	0.067	0.011	0.174	0.037	0.229	0.024	0.063	0.001	0.001	0.008	0.008	0.019	0.018	0.09	0.103	0.048	0.133	0.073	0.004	0.016	0.082	0.088	0.105	0.077	0.064	0.001	0.007	0.002	0.002	0.009	0.036	0.009	0	0
170	510	130	0.069	0.037	0.361	0.08	0.155	0.055	0.004	0.043	0.264	0.085	0.093	0.323	0.796	0.32	0.047	0.168	0.273	0.149	0.082	0.174	0.005	0.004	0.057	0.014	0.011	0.105	0.38	0.457	0.219	0.349	0.244	0.133	0.074	0.345	0.148	0.415	0.283	0.312	0.01	0.012	0.458	0.002	0.03	0.134	0.021	0.01	0.003
150	510	150	0.124	0.031	0.446	0.12	0.255	0.076	0.005	0.085	0.402	0.133	0.099	0.445	0.961	0.359	0.052	0.255	0.483	0.172	0.11	0.243	0.01	0.017	0.067	0.024	0.013	0.069	0.565	0.555	0.322	0.512	0.355	0.348	0.083	0.503	0.203	0.568	0.471	0.395	0.024	0.038	0.588	0.004	0.051	0.179	0.013	0.004	0
170	510	150	0.108	0.055	0.413	0.119	0.333	0.062	0.005	0.134	0.288	0.124	0.09	0.411	0.747	0.178	0.039	0.248	0.541	0.354	0.109	0.22	0.003	0.038	0.073	0.017	0.013	0.09	0.517	0.586	0.309	0.474	0.358	0.516	0.085	0.476	0.2	0.504	0.392	0.258	0.031	0.03	0.535	0.002	0.119	0.116	0.023	0	0.003
190	510	150	0.09	0.06	0.219	0.084	0.239	0.036	0.005	0.056	0.146	0.082	0.058	0.254	0.397	0.089	0.028	0.151	0.319	0.382	0.082	0.146	0.001	0.018	0.046	0.021	0.011	0.079	0.343	0.329	0.207	0.379	0.257	0.232	0.064	0.331	0.136	0.306	0.237	0.157	0.026	0.015	0.371	0.001	0.003	0.065	0.012	0	0.001
110	510	170	0.115	0.039	0.427	0.108	0.177	0.045	0.005	0.081	0.337	0.11	0.057	0.464	0.95	0.594	0.037	0.228	0.317	0.102	0.092	0.233	0.007	0.01	0.063	0.008	0.019	0.084	0.608	0.499	0.357	0.45	0.353	0.06	0.068	0.44	0.197	0.499	0.511	0.217	0.009	0.042	0.672	0.003	0.038	0.196	0.03	0	0.004
130	510	170	0.132	0.07	0.449	0.131	0.219	0.067	0.007	0.151	0.368	0.141	0.079	0.56	0.977	0.42	0.049	0.281	0.573	0.203	0.116	0.257	0.01	0.005	0.074	0.014	0.016	0.07	0.666	0.61	0.387	0.547	0.418	0.304	0.088	0.531	0.226	0.603	0.61	0.241	0.021	0.046	0.62	0.003	0.039	0.18	0.03	0.004	0.002
150	510	170	0.129	0.06	0.429	0.151	0.223	0.077	0.026	0.195	0.323	0.144	0.083	0.438	0.694	0.201	0.041	0.253	0.626	0.514	0.179	0.226	0.004	0.01	0.071	0.03	0.025	0.088	0.557	0.539	0.324	0.488	0.396	0.561	0.088	0.48	0.206	0.543	0.506	0.235	0.072	0.021	0.414	0.001	0.018	0.106	0.018	0	0.002
170	510	170	0.114	0.036	0.217	0.157	0.22	0.054	0.052	0.09	0.137	0.11	0.087	0.31	0.34	0.116	0.025	0.191	0.339	0.321	0.184	0.172	0.001	0.016	0.07	0.058	0.041	0.086	0.378	0.453	0.223	0.382	0.292	0.223	0.089	0.337	0.153	0.396	0.297	0.176	0.08	0.019	0.177	0.001	0.004	0.097	0.017	0.002	0.003
190	510	170	0.094	0.025	0.076	0.15	0.218	0.034	0.067	0.056	0.068	0.108	0.078	0.245	0.244	0.123	0.024	0.179	0.156	0.122	0.159	0.142	0.001	0.01	0.049	0.056	0.035	0.066	0.28	0.345	0.177	0.378	0.204	0.029	0.068	0.248	0.12	0.303	0.212	0.128	0.057	0.018	0.066	0.001	0.004	0.071	0.02	0.001	0
210	510	170	0.081	0.021	0.081	0.136	0.227	0.03	0.095	0.093	0.047	0.121	0.084	0.264	0.262	0.186	0.029	0.176	0.182	0.115	0.107	0.151	0.001	0.009	0.041	0.024	0.021	0.051	0.286	0.378	0.18	0.357	0.21	0.018	0.055	0.215	0.126	0.31	0.236	0.144	0.048	0.018	0.074	0.001	0.005	0.095	0.019	0.003	0
230	510	170	0.068	0.021	0.079	0.117	0.205	0.028	0.143	0.131	0.034	0.125	0.09	0.252	0.261	0.256	0.039	0.152	0.212	0.095	0.069	0.178	0.001	0.005	0.033	0.017	0.013	0.05	0.275	0.34	0.168	0.302	0.189	0.014	0.043	0.202	0.113	0.293	0.254	0.151	0.024	0.014	0.065	0.001	0.003	0.121	0.016	0.007	0
90	510	190	0.143	0.051	0.418	0.092	0.195	0.035	0.003	0.07	0.312	0.093	0.039	0.429	0.732	0.555	0.029	0.198	0.221	0.11	0.083	0.225	0.011	0.051	0.056	0.008	0.022	0.066	0.495	0.461	0.328	0.392	0.313	0.039	0.061	0.371	0.174	0.449	0.492	0.212	0.003	0.044	0.603	0.005	0.036	0.187	0.018	0.001	0.004
110	510	190	0.17	0.132	0.494	0.133	0.24	0.066	0.008	0.118	0.469	0.226	0.069	0.564	0.749	0.521	0.049	0.253	0.508	0.172	0.105	0.269	0.021	0.059	0.112	0.01	0.022	0.076	0.638	0.575	0.396	0.531	0.453	0.286	0.084	0.491	0.217	0.566	0.546	0.221	0.003	0.051	0.675	0.003	0.103	0.195	0.024	0	0.001
130	510	190	0.171	0.144	0.471	0.139	0.227	0.088	0.033	0.145	0.372	0.142	0.069	0.544	0.812	0.253	0.038	0.254	0.646	0.254	0.125	0.246	0.007	0.024	0.076	0.023	0.017	0.151	0.598	0.58	0.363	0.491	0.441	0.616	0.078	0.497	0.22	0.541	0.529	0.226	0.045	0.054	0.498	0.001	0.052	0.133	0.022	0.002	0
150	510	190	0.189	0.052	0.215	0.156	0.271	0.124	0.148	0.097	0.136	0.138	0.095	0.371	0.435	0.153	0.037	0.229	0.461	0.276	0.149	0.209	0.002	0.079	0.101	0.067	0.023	0.074	0.453	0.577	0.272	0.412	0.369	0.268	0.076	0.398	0.201	0.449	0.371	0.197	0.076	0.023	0.204	0.003	0.033	0.131	0.027	0.001	0
170	510	190	0.219	0.034	0.071	0.159	0.313	0.111	0.208	0.064	0.047	0.195	0.154	0.369	0.268	0.159	0.061	0.235	0.3	0.194	0.107	0.183	0.002	0.156	0.088	0.057	0.031	0.071	0.381	0.565	0.233	0.402	0.309	0.061	0.085	0.365	0.2	0.427	0.306	0.194	0.053	0.025	0.04	0.003	0.008	0.103	0.028	0.004	0
190	510	190	0.22	0.025	0.052	0.172	0.298	0.06	0.232	0.064	0.027	0.199	0.174	0.349	0.251	0.171	0.062	0.229	0.259	0.178	0.097	0.186	0.001	0.108	0.053	0.035	0.027	0.067	0.374	0.48	0.224	0.47	0.306	0.042	0.073	0.353	0.198	0.446	0.314	0.199	0.026	0.025	0.029	0.003	0.005	0.09	0.028	0.016	0
210	510	190	0.178	0.023	0.056	0.178	0.269	0.045	0.231	0.086	0.031	0.167	0.16	0.314	0.244	0.223	0.049	0.206	0.231	0.135	0.078	0.186	0.001	0.047	0.039	0.034	0.026	0.056	0.35	0.449	0.205	0.501	0.277	0.033	0.058	0.28	0.174	0.406	0.282	0.184	0.018	0.024	0.031	0.002	0.006	0.125	0.028	0.009	0
230	510	190	0.12	0.021	0.059	0.151	0.241	0.036	0.234	0.084	0.029	0.127	0.101	0.264	0.217	0.2	0.05	0.173	0.212	0.107	0.066	0.162	0.001	0.018	0.031	0.02	0.025	0.051	0.316	0.393	0.178	0.395	0.236	0.022	0.047	0.242	0.16	0.36	0.236	0.169	0.016	0.02	0.029	0.003	0.005	0.157	0.024	0.004	0
250	510	190	0.084	0.015	0.057	0.125	0.257	0.03	0.147	0.075	0.025	0.095	0.079	0.196	0.206	0.227	0.034	0.132	0.178	0.085	0.053	0.133	0.002	0.005	0.022	0.014	0.025	0.045	0.249	0.228	0.142	0.399	0.19	0.015	0.037	0.201	0.144	0.29	0.205	0.142	0.015	0.017	0.027	0.001	0.004	0.145	0.019	0	0
90	510	210	0.158	0.116	0.527	0.105	0.228	0.05	0.004	0.089	0.308	0.091	0.047	0.436	0.758	0.464	0.036	0.225	0.348	0.116	0.088	0.23	0.012	0.064	0.048	0.013	0.023	0.06	0.504	0.492	0.347	0.428	0.384	0.142	0.076	0.397	0.185	0.48	0.494	0.187	0.012	0.042	0.674	0.001	0.05	0.207	0.028	0.002	0.007
110	510	210	0.151	0.189	0.498	0.183	0.231	0.07	0.021	0.112	0.405	0.14	0.059	0.527	0.63	0.303	0.041	0.25	0.566	0.236	0.106	0.263	0.012	0.078	0.067	0.017	0.023	0.085	0.575	0.545	0.36	0.458	0.442	0.553	0.076	0.488	0.207	0.517	0.477	0.218	0.025	0.026	0.655	0.002	0.009	0.165	0.013	0.002	0.002
130	510	210	0.196	0.096	0.253	0.128	0.249	0.105	0.164	0.135	0.215	0.131	0.089	0.429	0.403	0.145	0.044	0.227	0.455	0.461	0.14	0.21	0.003	0.118	0.095	0.059	0.031	0.127	0.445	0.528	0.277	0.404	0.371	0.42	0.078	0.422	0.192	0.436	0.354	0.183	0.046	0.04	0.207	0.003	0.017	0.174	0.037	0.001	0.002
150	510	210	0.317	0.036	0.067	0.141	0.291	0.177	0.318	0.098	0.048	0.226	0.172	0.459	0.268	0.153	0.075	0.236	0.39	0.179	0.132	0.192	0.002	0.196	0.088	0.058	0.053	0.08	0.407	0.585	0.251	0.409	0.342	0.101	0.1	0.392	0.21	0.423	0.319	0.188	0.055	0.03	0.032	0.005	0.009	0.155	0.031	0	0
170	510	210	0.255	0.029	0.042	0.168	0.314	0.103	0.282	0.07	0.022	0.188	0.142	0.367	0.206	0.133	0.058	0.228	0.278	0.151	0.095	0.186	0.001	0.067	0.061	0.039	0.037	0.065	0.395	0.558	0.235	0.478	0.316	0.054	0.077	0.351	0.196	0.439	0.336	0.194	0.023	0.024	0.018	0.003	0.004	0.096	0.04	0.014	0
190	510	210	0.14	0.02	0.034	0.209	0.305	0.052	0.211	0.044	0.017	0.14	0.124	0.269	0.187	0.14	0.045	0.212	0.193	0.162	0.079	0.179	0.001	0.021	0.041	0.043	0.022	0.06	0.373	0.459	0.218	0.391	0.296	0.054	0.06	0.338	0.177	0.423	0.337	0.193	0.01	0.028	0.014	0.002	0.005	0.08	0.042	0.028	0
210	510	210	0.11	0.017	0.039	0.213	0.31	0.051	0.225	0.039	0.021	0.143	0.169	0.277	0.216	0.18	0.067	0.189	0.21	0.138	0.07	0.168	0.001	0.035	0.034	0.066	0.048	0.062	0.334	0.44	0.186	0.359	0.285	0.041	0.061	0.265	0.168	0.372	0.278	0.176	0.013	0.03	0.02	0.006	0.006	0.09	0.034	0	0
230	510	210	0.108	0.019	0.037	0.21	0.317	0.047	0.194	0.038	0.022	0.169	0.166	0.277	0.228	0.212	0.143	0.151	0.221	0.117	0.061	0.149	0.001	0.062	0.031	0.081	0.078	0.056	0.29	0.396	0.152	0.318	0.26	0.038	0.053	0.217	0.183	0.309	0.224	0.156	0.016	0.025	0.018	0.012	0.004	0.115	0.033	0	0
250	510	210	0.091	0.017	0.06	0.147	0.294	0.039	0.226	0.045	0.026	0.114	0.107	0.224	0.231	0.33	0.089	0.125	0.202	0.097	0.051	0.13	0.002	0.022	0.023	0.037	0.055	0.049	0.24	0.234	0.124	0.29	0.197	0.025	0.042	0.187	0.123	0.258	0.211	0.134	0.011	0.017	0.04	0.003	0.004	0.106	0.022	0	0
270	510	210	0.066	0.017	0.098	0.102	0.226	0.038	0.149	0.076	0.043	0.086	0.073	0.17	0.263	0.394	0.04	0.115	0.195	0.104	0.042	0.129	0.003	0.008	0.019	0.03	0.029	0.043	0.193	0.195	0.097	0.265	0.147	0.01	0.033	0.155	0.086	0.208	0.225	0.122	0.007	0.019	0.07	0.002	0.011	0.089	0.017	0.001	0
290	510	210	0.048	0.021	0.038	0.059	0.176	0.023	0.045	0.046	0.034	0.052	0.041	0.054	0.139	0.146	0.022	0.123	0.092	0.135	0.031	0.115	0.002	0.003	0.012	0.02	0.014	0.029	0.128	0.132	0.08	0.183	0.103	0.003	0.026	0.109	0.061	0.153	0.13	0.111	0.004	0.011	0.015	0.004	0.013	0.04	0.015	0	0
70	510	230	0.157	0.049	0.299	0.076	0.227	0.025	0.004	0.063	0.22	0.05	0.022	0.294	0.615	0.266	0.013	0.146	0.1	0.119	0.063	0.131	0.004	0.026	0.042	0.006	0.024	0.051	0.345	0.488	0.256	0.322	0.284	0.011	0.052	0.318	0.129	0.28	0.272	0.116	0.011	0.021	0.514	0.002	0.017	0.103	0.01	0	0.005
90	510	230	0.157	0.134	0.502	0.106	0.245	0.055	0.009	0.091	0.276	0.08	0.042	0.407	0.758	0.218	0.033	0.205	0.39	0.179	0.091	0.185	0.006	0.09	0.049	0.01	0.022	0.066	0.478	0.461	0.312	0.462	0.379	0.308	0.074	0.421	0.177	0.435	0.411	0.186	0.027	0.031	0.68	0.003	0.024	0.134	0.026	0.004	0.031
110	510	230	0.184	0.152	0.243	0.158	0.282	0.087	0.153	0.162	0.205	0.077	0.044	0.39	0.454	0.104	0.027	0.207	0.41	0.414	0.195	0.184	0.005	0.068	0.069	0.031	0.045	0.104	0.408	0.422	0.252	0.397	0.343	0.346	0.091	0.396	0.163	0.378	0.314	0.151	0.059	0.034	0.353	0.002	0.02	0.128	0.02	0	0
130	510	230	0.278	0.051	0.06	0.147	0.3	0.247	0.327	0.185	0.044	0.185	0.129	0.484	0.22	0.118	0.065	0.219	0.404	0.158	0.199	0.181	0.002	0.171	0.075	0.042	0.049	0.077	0.362	0.51	0.227	0.395	0.332	0.073	0.097	0.379	0.178	0.362	0.292	0.152	0.054	0.028	0.058	0.004	0.014	0.194	0.026	0.001	0
150	510	230	0.287	0.036	0.039	0.155	0.306	0.216	0.36	0.159	0.027	0.161	0.101	0.421	0.184	0.115	0.052	0.218	0.371	0.133	0.127	0.199	0.001	0.039	0.058	0.035	0.046	0.068	0.37	0.506	0.221	0.39	0.308	0.052	0.091	0.331	0.174	0.402	0.304	0.161	0.02	0.026	0.023	0.004	0.005	0.13	0.041	0.032	0
170	510	230	0.151	0.021	0.025	0.144	0.248	0.062	0.276	0.066	0.017	0.117	0.071	0.285	0.175	0.098	0.027	0.211	0.214	0.195	0.084	0.172	0.001	0.003	0.042	0.016	0.017	0.058	0.346	0.502	0.207	0.355	0.286	0.072	0.057	0.311	0.156	0.4	0.373	0.179	0.007	0.024	0.006	0.002	0.01	0.034	0.051	0.124	0
190	510	230	0.112	0.016	0.023	0.146	0.255	0.037	0.267	0.029	0.016	0.118	0.081	0.239	0.171	0.134	0.031	0.192	0.157	0.142	0.071	0.169	0.001	0.004	0.033	0.024	0.015	0.06	0.336	0.419	0.193	0.355	0.283	0.056	0.052	0.317	0.157	0.386	0.348	0.176	0.004	0.028	0.005	0.002	0.006	0.059	0.046	0.038	0
210	510	230	0.1	0.014	0.024	0.187	0.302	0.039	0.306	0.029	0.015	0.135	0.125	0.239	0.188	0.161	0.054	0.165	0.136	0.124	0.063	0.156	0.001	0.01	0.027	0.054	0.041	0.055	0.3	0.402	0.165	0.31	0.269	0.036	0.051	0.242	0.144	0.33	0.25	0.16	0.008	0.028	0.01	0.005	0.005	0.075	0.038	0.038	0
230	510	230	0.086	0.016	0.028	0.162	0.309	0.039	0.34	0.025	0.017	0.14	0.132	0.241	0.181	0.185	0.106	0.133	0.141	0.111	0.053	0.13	0.001	0.017	0.026	0.064	0.074	0.053	0.252	0.345	0.129	0.261	0.221	0.032	0.046	0.195	0.125	0.265	0.192	0.129	0.007	0.022	0.013	0.01	0.003	0.057	0.033	0.018	0.001
250	510	230	0.074	0.016	0.04	0.133	0.275	0.041	0.343	0.029	0.018	0.095	0.096	0.207	0.183	0.242	0.089	0.11	0.157	0.109	0.045	0.115	0.002	0.01	0.022	0.045	0.084	0.042	0.216	0.208	0.104	0.236	0.175	0.026	0.039	0.17	0.094	0.226	0.183	0.114	0.004	0.019	0.023	0.002	0.003	0.044	0.026	0	0
270	510	230	0.063	0.017	0.073	0.122	0.219	0.047	0.244	0.049	0.026	0.078	0.066	0.175	0.195	0.307	0.065	0.093	0.183	0.125	0.039	0.103	0.002	0.007	0.018	0.043	0.071	0.034	0.182	0.179	0.085	0.205	0.139	0.013	0.032	0.144	0.077	0.189	0.19	0.109	0.005	0.019	0.046	0.002	0.004	0.058	0.02	0	0
290	510	230	0.05	0.019	0.057	0.084	0.204	0.038	0.138	0.055	0.033	0.057	0.049	0.091	0.157	0.195	0.038	0.099	0.127	0.15	0.034	0.09	0.003	0.004	0.014	0.03	0.041	0.029	0.144	0.147	0.071	0.182	0.113	0.004	0.028	0.12	0.064	0.162	0.14	0.107	0.008	0.017	0.033	0.006	0.031	0.047	0.018	0	0
70	510	250	0.158	0.061	0.315	0.074	0.223	0.026	0.003	0.07	0.19	0.046	0.023	0.281	0.501	0.19	0.013	0.133	0.127	0.107	0.062	0.119	0.002	0.014	0.032	0.006	0.023	0.069	0.345	0.439	0.236	0.29	0.263	0.015	0.047	0.321	0.121	0.252	0.214	0.106	0.005	0.018	0.554	0.001	0.028	0.091	0.008	0	0
90	510	250	0.192	0.104	0.303	0.093	0.289	0.051	0.118	0.161	0.239	0.051	0.028	0.358	0.418	0.084	0.019	0.173	0.306	0.309	0.183	0.155	0.006	0.037	0.056	0.012	0.043	0.091	0.394	0.398	0.226	0.33	0.293	0.211	0.104	0.363	0.148	0.33	0.255	0.128	0.052	0.026	0.389	0.001	0.014	0.11	0.017	0.007	0.005
110	510	250	0.201	0.044	0.048	0.105	0.329	0.153	0.364	0.215	0.05	0.087	0.057	0.389	0.187	0.063	0.033	0.178	0.304	0.118	0.382	0.156	0.009	0.106	0.058	0.026	0.109	0.072	0.329	0.372	0.173	0.335	0.265	0.067	0.177	0.327	0.135	0.288	0.226	0.108	0.059	0.026	0.064	0.002	0.009	0.129	0.02	0.011	0
130	510	250	0.258	0.027	0.039	0.139	0.324	0.26	0.434	0.201	0.027	0.149	0.085	0.455	0.158	0.091	0.048	0.209	0.384	0.118	0.2	0.169	0.003	0.062	0.052	0.044	0.062	0.071	0.351	0.46	0.194	0.346	0.293	0.036	0.113	0.332	0.156	0.341	0.255	0.133	0.038	0.025	0.041	0.005	0.007	0.163	0.041	0.025	0
150	510	250	0.185	0.022	0.021	0.156	0.263	0.093	0.44	0.138	0.022	0.101	0.052	0.31	0.141	0.07	0.021	0.19	0.212	0.128	0.108	0.161	0.002	0.002	0.046	0.021	0.029	0.058	0.331	0.44	0.184	0.318	0.271	0.059	0.069	0.297	0.141	0.351	0.24	0.124	0.012	0.02	0.007	0.002	0.006	0.057	0.053	0.208	0
170	510	250	0.119	0.014	0.019	0.144	0.247	0.036	0.592	0.029	0.014	0.087	0.054	0.246	0.161	0.08	0.019	0.178	0.122	0.149	0.072	0.154	0.001	0.001	0.038	0.033	0.016	0.05	0.301	0.447	0.168	0.292	0.25	0.081	0.046	0.284	0.135	0.333	0.222	0.132	0.007	0.024	0.001	0.003	0.007	0.005	0.052	0.262	0
190	510	250	0.097	0.011	0.02	0.128	0.268	0.032	0.734	0.015	0.01	0.084	0.058	0.221	0.171	0.103	0.022	0.16	0.125	0.121	0.064	0.15	0.001	0.001	0.029	0.026	0.018	0.047	0.281	0.368	0.156	0.286	0.248	0.073	0.044	0.287	0.128	0.311	0.214	0.138	0.004	0.022	0.002	0.002	0.021	0.019	0.054	0.071	0
210	510	250	0.081	0.012	0.019	0.139	0.272	0.036	0.64	0.016	0.012	0.095	0.086	0.215	0.17	0.13	0.036	0.136	0.128	0.102	0.057	0.139	0.001	0.004	0.024	0.045	0.047	0.048	0.251	0.354	0.138	0.267	0.23	0.047	0.043	0.22	0.116	0.271	0.194	0.132	0.004	0.023	0.004	0.002	0.004	0.028	0.043	0.01	0
230	510	250	0.079	0.014	0.018	0.13	0.259	0.034	0.573	0.016	0.013	0.089	0.083	0.209	0.158	0.148	0.06	0.113	0.13	0.104	0.048	0.115	0.001	0.006	0.022	0.048	0.079	0.042	0.214	0.297	0.112	0.239	0.19	0.04	0.038	0.182	0.096	0.228	0.165	0.11	0.002	0.018	0.008	0.002	0.003	0.02	0.034	0.003	0
250	510	250	0.066	0.014	0.021	0.149	0.242	0.043	0.425	0.016	0.013	0.076	0.066	0.181	0.148	0.166	0.068	0.098	0.128	0.127	0.042	0.104	0.001	0.005	0.023	0.059	0.112	0.034	0.186	0.183	0.089	0.212	0.158	0.027	0.033	0.157	0.083	0.204	0.148	0.099	0.002	0.019	0.013	0.002	0.003	0.022	0.025	0	0
270	510	250	0.054	0.015	0.03	0.135	0.224	0.057	0.328	0.021	0.014	0.073	0.056	0.159	0.141	0.199	0.07	0.091	0.131	0.14	0.037	0.096	0.002	0.005	0.019	0.058	0.116	0.03	0.169	0.165	0.075	0.192	0.136	0.013	0.031	0.135	0.072	0.176	0.134	0.099	0.003	0.018	0.017	0.001	0.004	0.031	0.021	0	0
290	510	250	0.045	0.016	0.034	0.1	0.206	0.054	0.241	0.028	0.019	0.065	0.051	0.11	0.129	0.175	0.047	0.102	0.132	0.176	0.034	0.091	0.003	0.005	0.015	0.047	0.079	0.027	0.147	0.155	0.065	0.177	0.115	0.005	0.035	0.121	0.064	0.166	0.12	0.104	0.01	0.017	0.02	0.003	0.015	0.048	0.019	0.006	0
70	510	270	0.133	0.068	0.251	0.072	0.259	0.027	0.148	0.15	0.108	0.04	0.027	0.304	0.418	0.084	0.009	0.128	0.149	0.097	0.094	0.109	0.042	0.014	0.035	0.005	0.034	0.063	0.312	0.311	0.181	0.24	0.21	0.051	0.102	0.285	0.103	0.21	0.161	0.081	0.042	0.026	0.383	0.002	0.013	0.061	0.015	0	0.001
90	510	270	0.208	0.054	0.053	0.092	0.361	0.08	0.516	0.271	0.074	0.038	0.038	0.412	0.203	0.031	0.013	0.158	0.274	0.097	0.217	0.125	0.047	0.009	0.058	0.008	0.064	0.056	0.296	0.305	0.145	0.243	0.206	0.072	0.304	0.279	0.104	0.217	0.178	0.071	0.068	0.03	0.109	0.003	0.01	0.103	0.016	0.03	0.005
110	510	270	0.206	0.027	0.03	0.083	0.283	0.128	0.469	0.178	0.021	0.084	0.061	0.408	0.117	0.063	0.032	0.149	0.266	0.089	0.255	0.128	0.014	0.119	0.048	0.015	0.104	0.058	0.277	0.315	0.141	0.256	0.214	0.02	0.184	0.28	0.112	0.228	0.185	0.082	0.046	0.021	0.038	0.004	0.005	0.093	0.024	0.036	0
130	510	270	0.197	0.022	0.02	0.098	0.321	0.126	0.467	0.116	0.019	0.075	0.041	0.343	0.099	0.053	0.02	0.167	0.197	0.1	0.134	0.138	0.003	0.007	0.039	0.018	0.057	0.066	0.296	0.375	0.157	0.29	0.235	0.049	0.094	0.276	0.12	0.265	0.197	0.105	0.024	0.022	0.011	0.003	0.006	0.064	0.048	0.155	0
150	510	270	0.122	0.016	0.016	0.109	0.259	0.036	0.55	0.03	0.014	0.075	0.043	0.259	0.123	0.062	0.019	0.155	0.114	0.105	0.068	0.131	0.002	0.001	0.036	0.024	0.019	0.049	0.276	0.368	0.146	0.256	0.222	0.064	0.042	0.258	0.114	0.263	0.188	0.107	0.007	0.022	0.004	0.002	0.007	0.003	0.058	0.318	0
170	510	270	0.097	0.013	0.016	0.124	0.245	0.029	0.72	0.014	0.014	0.078	0.048	0.233	0.138	0.079	0.023	0.143	0.113	0.131	0.061	0.13	0.001	0.001	0.03	0.031	0.018	0.044	0.259	0.374	0.134	0.244	0.206	0.062	0.04	0.246	0.11	0.265	0.176	0.11	0.007	0.021	0.003	0.001	0.008	0.001	0.042	0.177	0
190	510	270	0.09	0.013	0.016	0.13	0.234	0.031	0.726	0.012	0.01	0.076	0.051	0.228	0.135	0.099	0.035	0.13	0.111	0.107	0.056	0.126	0.001	0.002	0.028	0.045	0.034	0.045	0.239	0.301	0.118	0.237	0.195	0.049	0.04	0.241	0.104	0.245	0.163	0.111	0.007	0.022	0.002	0.001	0.003	0.002	0.039	0.05	0
210	510	270	0.085	0.015	0.016	0.148	0.27	0.034	0.622	0.012	0.012	0.081	0.07	0.217	0.141	0.122	0.043	0.116	0.108	0.107	0.051	0.117	0.001	0.005	0.022	0.059	0.057	0.043	0.214	0.308	0.102	0.232	0.188	0.04	0.042	0.187	0.098	0.218	0.152	0.108	0.003	0.019	0.003	0.002	0.003	0.007	0.038	0.016	0
230	510	270	0.071	0.013	0.015	0.135	0.271	0.037	0.564	0.013	0.012	0.079	0.07	0.194	0.139	0.146	0.048	0.103	0.105	0.124	0.046	0.11	0.001	0.007	0.02	0.056	0.078	0.036	0.193	0.276	0.089	0.215	0.165	0.032	0.037	0.165	0.086	0.201	0.138	0.102	0.002	0.017	0.006	0.001	0.002	0.013	0.028	0.004	0
250	510	270	0.058	0.012	0.015	0.138	0.241	0.038	0.412	0.013	0.01	0.071	0.053	0.168	0.125	0.153	0.058	0.092	0.096	0.141	0.04	0.094	0.001	0.005	0.017	0.056	0.099	0.031	0.169	0.16	0.076	0.198	0.139	0.021	0.032	0.144	0.076	0.182	0.121	0.095	0.002	0.016	0.009	0.001	0.002	0.013	0.022	0	0
270	510	270	0.047	0.013	0.02	0.127	0.23	0.048	0.331	0.014	0.01	0.064	0.047	0.148	0.126	0.161	0.055	0.09	0.106	0.143	0.035	0.088	0.001	0.003	0.016	0.061	0.11	0.028	0.15	0.154	0.066	0.186	0.125	0.01	0.027	0.126	0.068	0.159	0.11	0.097	0.003	0.014	0.013	0.001	0.002	0.016	0.02	0	0
290	510	270	0.04	0.015	0.025	0.095	0.21	0.048	0.238	0.02	0.015	0.057	0.044	0.104	0.126	0.163	0.041	0.134	0.11	0.156	0.032	0.084	0.002	0.003	0.013	0.053	0.087	0.027	0.134	0.146	0.059	0.169	0.11	0.004	0.023	0.115	0.065	0.157	0.103	0.104	0.007	0.014	0.018	0.002	0.01	0.032	0.018	0	0
70	510	290	0.172	0.062	0.09	0.07	0.369	0.021	0.452	0.186	0.046	0.032	0.023	0.252	0.272	0.052	0.008	0.113	0.145	0.125	0.102	0.084	0.076	0.004	0.036	0.006	0.053	0.043	0.207	0.197	0.106	0.177	0.138	0.041	0.133	0.189	0.077	0.118	0.108	0.046	0.047	0.046	0.136	0.003	0.024	0.023	0.027	0.003	0.001
90	510	290	0.184	0.03	0.019	0.064	0.37	0.053	0.596	0.202	0.022	0.029	0.025	0.339	0.104	0.03	0.011	0.107	0.213	0.088	0.113	0.076	0.038	0.01	0.03	0.003	0.062	0.041	0.179	0.179	0.085	0.166	0.125	0.025	0.235	0.184	0.062	0.112	0.102	0.039	0.03	0.026	0.046	0.001	0.003	0.037	0.013	0.046	0
110	510	290	0.166	0.018	0.016	0.058	0.266	0.044	0.458	0.106	0.015	0.055	0.032	0.336	0.091	0.045	0.02	0.115	0.165	0.083	0.063	0.09	0.02	0.077	0.031	0.011	0.048	0.045	0.183	0.214	0.094	0.19	0.145	0.022	0.121	0.206	0.077	0.129	0.113	0.054	0.02	0.02	0.029	0.003	0.008	0.027	0.025	0.11	0
130	510	290	0.139	0.015	0.013	0.093	0.254	0.047	0.709	0.034	0.018	0.064	0.03	0.279	0.087	0.05	0.015	0.127	0.121	0.081	0.054	0.106	0.004	0.002	0.051	0.029	0.022	0.047	0.207	0.29	0.116	0.215	0.189	0.043	0.045	0.218	0.088	0.175	0.137	0.076	0.009	0.018	0.001	0.001	0.003	0.008	0.045	0.275	0
150	510	290	0.1	0.014	0.013	0.11	0.254	0.032	0.825	0.013	0.01	0.062	0.035	0.228	0.091	0.075	0.015	0.126	0.089	0.093	0.054	0.112	0.002	0.001	0.048	0.038	0.017	0.045	0.215	0.313	0.112	0.228	0.178	0.045	0.035	0.209	0.09	0.194	0.141	0.081	0.001	0.017	0.002	0.001	0.003	0.001	0.039	0.34	0
170	510	290	0.086	0.012	0.014	0.132	0.276	0.027	0.912	0.01	0.013	0.06	0.039	0.191	0.098	0.089	0.017	0.127	0.08	0.108	0.053	0.116	0.001	0.001	0.029	0.043	0.018	0.038	0.223	0.338	0.109	0.212	0.176	0.047	0.034	0.214	0.092	0.211	0.145	0.09	0.001	0.017	0.001	0.001	0.003	0.001	0.034	0.167	0
190	510	290	0.071	0.012	0.014	0.138	0.31	0.027	0.778	0.009	0.009	0.06	0.044	0.179	0.109	0.095	0.027	0.113	0.085	0.106	0.049	0.115	0.001	0.001	0.022	0.054	0.028	0.04	0.209	0.263	0.102	0.206	0.178	0.048	0.035	0.213	0.089	0.206	0.138	0.095	0.001	0.016	0.003	0.001	0.004	0.002	0.038	0.022	0
210	510	290	0.064	0.013	0.014	0.144	0.288	0.032	0.552	0.01	0.01	0.073	0.056	0.173	0.127	0.111	0.048	0.112	0.087	0.115	0.046	0.108	0.001	0.004	0.019	0.08	0.059	0.039	0.194	0.281	0.091	0.211	0.169	0.03	0.037	0.168	0.087	0.193	0.137	0.096	0.002	0.019	0.005	0.002	0.004	0.007	0.036	0.004	0
230	510	290	0.06	0.013	0.013	0.121	0.271	0.034	0.443	0.012	0.01	0.069	0.053	0.155	0.117	0.111	0.053	0.109	0.087	0.133	0.043	0.1	0.001	0.004	0.018	0.063	0.067	0.034	0.171	0.255	0.08	0.202	0.147	0.023	0.032	0.149	0.079	0.185	0.124	0.094	0.002	0.015	0.006	0.001	0.002	0.011	0.026	0.001	0
250	510	290	0.052	0.015	0.013	0.12	0.244	0.033	0.364	0.01	0.01	0.059	0.043	0.133	0.108	0.121	0.05	0.103	0.08	0.153	0.037	0.095	0.001	0.003	0.015	0.056	0.073	0.029	0.152	0.152	0.069	0.181	0.127	0.017	0.027	0.133	0.071	0.17	0.113	0.093	0.001	0.014	0.007	0.001	0.001	0.019	0.021	0	0
270	510	290	0.043	0.016	0.017	0.106	0.221	0.035	0.3	0.01	0.011	0.056	0.041	0.117	0.11	0.136	0.04	0.093	0.083	0.154	0.034	0.098	0.001	0.002	0.014	0.049	0.081	0.025	0.139	0.151	0.061	0.167	0.113	0.009	0.025	0.118	0.065	0.155	0.112	0.11	0.003	0.012	0.01	0.001	0.002	0.021	0.021	0	0
290	510	290	0.037	0.018	0.019	0.075	0.202	0.024	0.184	0.013	0.019	0.05	0.039	0.079	0.11	0.123	0.026	0.104	0.079	0.161	0.029	0.092	0.001	0.002	0.011	0.04	0.079	0.027	0.121	0.135	0.055	0.154	0.097	0.003	0.021	0.101	0.062	0.148	0.104	0.122	0.007	0.011	0.013	0.003	0.031	0.017	0.018	0	0
150	530	150	0.155	0.026	0.12	0.307	0.264	0.06	0.19	0.129	0.062	0.121	0.105	0.435	0.432	0.086	0.03	0.209	0.294	0.142	0.626	0.163	0.005	0.046	0.076	0.241	0.198	0.089	0.416	0.481	0.213	0.349	0.264	0.037	0.224	0.374	0.148	0.361	0.279	0.345	0.297	0.024	0.19	0.006	0.007	0.066	0.018	0	0
170	530	150	0.141	0.023	0.067	0.344	0.278	0.067	0.28	0.104	0.043	0.154	0.148	0.429	0.413	0.095	0.035	0.191	0.306	0.18	0.647	0.164	0.007	0.035	0.09	0.372	0.233	0.091	0.396	0.489	0.214	0.346	0.256	0.026	0.246	0.336	0.149	0.368	0.254	0.184	0.291	0.03	0.104	0.004	0.008	0.063	0.033	0	0
190	530	150	0.106	0.02	0.035	0.292	0.274	0.061	0.222	0.07	0.028	0.144	0.168	0.34	0.373	0.106	0.037	0.166	0.278	0.134	0.479	0.153	0.003	0.02	0.136	0.311	0.189	0.101	0.335	0.386	0.188	0.301	0.211	0.015	0.17	0.293	0.125	0.318	0.222	0.148	0.243	0.019	0.053	0.006	0.009	0.023	0.017	0	0.001
130	530	170	0.163	0.029	0.101	0.299	0.307	0.08	0.204	0.139	0.085	0.105	0.096	0.485	0.44	0.072	0.027	0.208	0.374	0.15	0.695	0.191	0.007	0.051	0.119	0.156	0.233	0.067	0.455	0.489	0.256	0.379	0.325	0.056	0.305	0.437	0.178	0.402	0.349	0.186	0.324	0.024	0.127	0.003	0.012	0.068	0.015	0.001	0.001
150	530	170	0.184	0.025	0.035	0.448	0.322	0.118	0.281	0.119	0.04	0.159	0.163	0.477	0.328	0.097	0.043	0.222	0.384	0.146	0.809	0.196	0.008	0.055	0.119	0.175	0.304	0.095	0.458	0.534	0.252	0.397	0.325	0.038	0.433	0.387	0.177	0.449	0.347	0.191	0.337	0.026	0.016	0.003	0.016	0.069	0.024	0	0.001
170	530	170	0.146	0.02	0.03	0.457	0.314	0.127	0.345	0.074	0.024	0.192	0.181	0.452	0.301	0.119	0.047	0.214	0.345	0.14	0.623	0.194	0.006	0.054	0.096	0.268	0.269	0.156	0.423	0.529	0.244	0.401	0.307	0.035	0.338	0.371	0.172	0.445	0.32	0.188	0.283	0.026	0.016	0.003	0.014	0.051	0.026	0	0.001
190	530	170	0.116	0.017	0.026	0.427	0.35	0.121	0.363	0.058	0.019	0.17	0.178	0.379	0.275	0.141	0.036	0.186	0.322	0.119	0.469	0.178	0.002	0.061	0.099	0.265	0.187	0.102	0.381	0.429	0.224	0.378	0.314	0.027	0.218	0.342	0.156	0.386	0.276	0.191	0.216	0.042	0.02	0.002	0.017	0.024	0.025	0	0.004
210	530	170	0.088	0.017	0.025	0.343	0.391	0.103	0.266	0.049	0.017	0.156	0.152	0.315	0.262	0.152	0.039	0.149	0.3	0.119	0.255	0.151	0.002	0.072	0.091	0.177	0.145	0.073	0.312	0.331	0.187	0.334	0.252	0.018	0.133	0.25	0.13	0.318	0.236	0.172	0.139	0.064	0.02	0.002	0.007	0.022	0.022	0.002	0.001
230	530	170	0.079	0.014	0.023	0.182	0.324	0.051	0.123	0.049	0.014	0.117	0.09	0.178	0.209	0.182	0.042	0.166	0.216	0.164	0.117	0.134	0.002	0.027	0.04	0.089	0.074	0.06	0.235	0.233	0.142	0.282	0.19	0.012	0.061	0.184	0.104	0.247	0.194	0.151	0.038	0.015	0.015	0.002	0.007	0.034	0.018	0	0
110	530	190	0.154	0.034	0.156	0.223	0.314	0.073	0.164	0.13	0.128	0.073	0.065	0.404	0.419	0.077	0.021	0.195	0.288	0.136	0.455	0.179	0.007	0.051	0.085	0.07	0.173	0.08	0.416	0.469	0.262	0.316	0.318	0.063	0.179	0.373	0.163	0.36	0.299	0.224	0.235	0.024	0.211	0.002	0.004	0.086	0.014	0	0
130	530	190	0.208	0.034	0.04	0.348	0.366	0.208	0.299	0.13	0.046	0.123	0.12	0.521	0.293	0.092	0.034	0.226	0.429	0.158	0.564	0.207	0.006	0.062	0.113	0.134	0.228	0.083	0.465	0.559	0.292	0.397	0.373	0.071	0.27	0.407	0.205	0.443	0.378	0.186	0.349	0.025	0.034	0.003	0.05	0.11	0.024	0.001	0
150	530	190	0.185	0.024	0.034	0.326	0.504	0.268	0.282	0.072	0.027	0.16	0.147	0.428	0.227	0.122	0.036	0.243	0.384	0.153	0.278	0.203	0.005	0.025	0.103	0.088	0.094	0.085	0.47	0.641	0.288	0.443	0.404	0.065	0.207	0.405	0.214	0.482	0.388	0.208	0.198	0.027	0.029	0.002	0.065	0.143	0.035	0	0.001
170	530	190	0.137	0.021	0.037	0.41	0.55	0.115	0.235	0.039	0.022	0.203	0.127	0.369	0.229	0.156	0.043	0.234	0.272	0.136	0.148	0.201	0.003	0.032	0.064	0.041	0.046	0.081	0.449	0.612	0.267	0.464	0.472	0.071	0.109	0.398	0.207	0.48	0.369	0.213	0.083	0.029	0.024	0.003	0.009	0.108	0.039	0	0
190	530	190	0.135	0.019	0.039	0.407	0.602	0.098	0.218	0.032	0.02	0.201	0.202	0.354	0.26	0.208	0.069	0.214	0.298	0.141	0.117	0.196	0.002	0.128	0.051	0.057	0.046	0.07	0.416	0.542	0.246	0.472	0.461	0.045	0.09	0.419	0.208	0.46	0.328	0.227	0.064	0.026	0.02	0.003	0.011	0.077	0.028	0.001	0.005
210	530	190	0.153	0.02	0.042	0.233	0.459	0.072	0.294	0.052	0.027	0.205	0.249	0.331	0.281	0.263	0.073	0.169	0.284	0.158	0.103	0.184	0.001	0.144	0.041	0.072	0.06	0.061	0.345	0.399	0.195	0.393	0.316	0.025	0.081	0.296	0.18	0.365	0.266	0.192	0.044	0.026	0.023	0.004	0.008	0.046	0.026	0.014	0
230	530	190	0.151	0.018	0.025	0.175	0.321	0.054	0.235	0.044	0.018	0.148	0.157	0.238	0.218	0.187	0.055	0.135	0.207	0.124	0.074	0.135	0.001	0.082	0.029	0.087	0.056	0.054	0.266	0.271	0.143	0.315	0.216	0.01	0.064	0.213	0.122	0.277	0.215	0.154	0.032	0.023	0.012	0.005	0.018	0.066	0.029	0.006	0.003
90	530	210	0.154	0.03	0.214	0.107	0.275	0.037	0.054	0.113	0.155	0.044	0.025	0.327	0.366	0.076	0.017	0.16	0.127	0.097	0.186	0.134	0.007	0.019	0.039	0.026	0.054	0.041	0.3	0.361	0.204	0.253	0.244	0.059	0.074	0.274	0.118	0.278	0.194	0.117	0.081	0.018	0.279	0.002	0.02	0.074	0.009	0	0
110	530	210	0.206	0.037	0.082	0.284	0.296	0.16	0.282	0.171	0.066	0.09	0.084	0.47	0.273	0.075	0.026	0.207	0.395	0.15	0.49	0.184	0.01	0.081	0.131	0.066	0.219	0.06	0.403	0.455	0.251	0.329	0.356	0.079	0.234	0.412	0.17	0.375	0.297	0.163	0.268	0.023	0.072	0.003	0.025	0.106	0.019	0	0
130	530	210	0.222	0.03	0.059	0.219	0.309	0.468	0.431	0.1	0.029	0.136	0.098	0.5	0.172	0.144	0.037	0.241	0.477	0.267	0.209	0.201	0.006	0.027	0.079	0.107	0.084	0.069	0.482	0.592	0.296	0.416	0.421	0.078	0.107	0.456	0.208	0.464	0.363	0.192	0.198	0.023	0.024	0.002	0.056	0.244	0.029	0.001	0.003
150	530	210	0.156	0.023	0.04	0.245	0.42	0.245	0.342	0.047	0.022	0.143	0.21	0.399	0.176	0.165	0.035	0.225	0.336	0.199	0.104	0.194	0.001	0.009	0.068	0.131	0.062	0.068	0.439	0.592	0.272	0.453	0.434	0.084	0.077	0.415	0.196	0.446	0.371	0.187	0.106	0.027	0.027	0.002	0.013	0.167	0.047	0.002	0.029
170	530	210	0.131	0.019	0.029	0.345	0.536	0.091	0.355	0.039	0.019	0.163	0.236	0.349	0.192	0.136	0.037	0.211	0.234	0.126	0.087	0.194	0.002	0.003	0.072	0.149	0.053	0.062	0.423	0.585	0.249	0.424	0.419	0.08	0.086	0.366	0.179	0.442	0.404	0.194	0.063	0.026	0.021	0.002	0.007	0.094	0.051	0.007	0.021
190	530	210	0.123	0.018	0.034	0.344	0.541	0.061	0.262	0.033	0.021	0.147	0.206	0.322	0.216	0.177	0.057	0.194	0.205	0.127	0.08	0.183	0.002	0.025	0.042	0.099	0.043	0.063	0.395	0.482	0.228	0.378	0.43	0.052	0.078	0.358	0.17	0.417	0.318	0.199	0.04	0.028	0.023	0.003	0.007	0.096	0.04	0.001	0.003
210	530	210	0.116	0.018	0.034	0.245	0.497	0.051	0.281	0.038	0.019	0.155	0.281	0.3	0.225	0.21	0.091	0.156	0.22	0.137	0.063	0.157	0.001	0.064	0.031	0.098	0.077	0.06	0.321	0.385	0.175	0.339	0.315	0.031	0.072	0.248	0.152	0.323	0.261	0.168	0.033	0.027	0.019	0.004	0.009	0.063	0.034	0	0
230	530	210	0.118	0.019	0.031	0.207	0.374	0.049	0.263	0.037	0.018	0.14	0.206	0.255	0.209	0.239	0.095	0.124	0.215	0.102	0.054	0.132	0.002	0.066	0.026	0.103	0.092	0.05	0.258	0.298	0.135	0.29	0.238	0.015	0.064	0.205	0.131	0.255	0.206	0.152	0.022	0.022	0.019	0.003	0.006	0.066	0.03	0	0
250	530	210	0.109	0.016	0.043	0.146	0.328	0.049	0.174	0.04	0.022	0.102	0.143	0.187	0.199	0.291	0.076	0.115	0.184	0.108	0.048	0.116	0.002	0.028	0.021	0.085	0.077	0.047	0.211	0.203	0.107	0.262	0.176	0.004	0.054	0.169	0.097	0.222	0.175	0.142	0.013	0.018	0.032	0.002	0.006	0.067	0.028	0.002	0
70	530	230	0.17	0.033	0.186	0.057	0.232	0.019	0.026	0.092	0.209	0.036	0.013	0.265	0.335	0.034	0.007	0.118	0.049	0.101	0.085	0.11	0.004	0.017	0.031	0.011	0.031	0.031	0.239	0.34	0.143	0.218	0.203	0.004	0.052	0.231	0.089	0.194	0.15	0.104	0.02	0.016	0.249	0.002	0.003	0.052	0.008	0.012	0
90	530	230	0.185	0.04	0.119	0.182	0.291	0.051	0.204	0.23	0.091	0.052	0.031	0.396	0.251	0.045	0.016	0.185	0.282	0.115	0.58	0.149	0.014	0.048	0.045	0.026	0.174	0.047	0.307	0.353	0.179	0.28	0.291	0.036	0.231	0.294	0.124	0.286	0.222	0.111	0.118	0.021	0.148	0.002	0.021	0.09	0.014	0.001	0
110	530	230	0.232	0.032	0.029	0.219	0.302	0.267	0.425	0.246	0.031	0.095	0.073	0.48	0.176	0.073	0.025	0.207	0.472	0.146	0.561	0.189	0.009	0.061	0.063	0.047	0.275	0.066	0.38	0.435	0.222	0.346	0.378	0.074	0.295	0.387	0.167	0.367	0.298	0.159	0.161	0.022	0.023	0.004	0.018	0.138	0.023	0.003	0
130	530	230	0.196	0.026	0.037	0.149	0.287	0.468	0.427	0.152	0.026	0.131	0.1	0.445	0.142	0.1	0.032	0.226	0.434	0.153	0.129	0.192	0.002	0.017	0.061	0.056	0.054	0.071	0.424	0.53	0.257	0.385	0.414	0.075	0.08	0.402	0.195	0.418	0.329	0.168	0.097	0.027	0.019	0.002	0.053	0.24	0.035	0.027	0.002
150	530	230	0.158	0.027	0.028	0.225	0.374	0.203	0.488	0.086	0.017	0.131	0.208	0.366	0.158	0.098	0.031	0.213	0.314	0.171	0.088	0.193	0.001	0.002	0.069	0.097	0.073	0.065	0.409	0.558	0.238	0.396	0.369	0.091	0.06	0.363	0.176	0.413	0.343	0.155	0.063	0.025	0.018	0.002	0.013	0.072	0.053	0.029	0.024
170	530	230	0.131	0.02	0.024	0.319	0.493	0.081	0.511	0.044	0.019	0.133	0.259	0.303	0.169	0.103	0.029	0.196	0.251	0.25	0.079	0.187	0.001	0.002	0.052	0.112	0.094	0.057	0.395	0.54	0.227	0.369	0.341	0.093	0.061	0.353	0.169	0.407	0.34	0.169	0.044	0.025	0.024	0.002	0.01	0.045	0.055	0.006	0.014
190	530	230	0.118	0.017	0.022	0.267	0.448	0.059	0.302	0.032	0.021	0.115	0.191	0.26	0.162	0.125	0.039	0.162	0.184	0.156	0.066	0.166	0.001	0.008	0.036	0.118	0.069	0.054	0.336	0.401	0.199	0.339	0.306	0.058	0.063	0.331	0.151	0.361	0.271	0.164	0.02	0.027	0.032	0.002	0.009	0.081	0.05	0.003	0.001
210	530	230	0.107	0.018	0.024	0.277	0.451	0.056	0.243	0.03	0.017	0.139	0.228	0.27	0.183	0.166	0.111	0.138	0.194	0.143	0.057	0.146	0.001	0.018	0.028	0.134	0.114	0.054	0.281	0.351	0.154	0.322	0.273	0.036	0.061	0.23	0.144	0.287	0.208	0.152	0.021	0.026	0.025	0.013	0.006	0.092	0.047	0	0
230	530	230	0.091	0.018	0.029	0.223	0.405	0.05	0.229	0.027	0.015	0.14	0.185	0.25	0.181	0.196	0.15	0.113	0.204	0.103	0.05	0.13	0.001	0.025	0.024	0.124	0.13	0.049	0.24	0.294	0.123	0.262	0.229	0.018	0.05	0.188	0.141	0.234	0.171	0.136	0.015	0.022	0.026	0.01	0.005	0.078	0.035	0.001	0
250	530	230	0.082	0.017	0.046	0.161	0.323	0.044	0.221	0.032	0.017	0.091	0.127	0.199	0.181	0.271	0.097	0.095	0.187	0.116	0.042	0.114	0.002	0.012	0.02	0.085	0.129	0.036	0.207	0.19	0.098	0.226	0.165	0.006	0.04	0.158	0.088	0.205	0.172	0.132	0.008	0.015	0.039	0.002	0.004	0.057	0.028	0	0
270	530	230	0.059	0.017	0.081	0.122	0.233	0.044	0.13	0.059	0.03	0.074	0.073	0.155	0.198	0.298	0.07	0.091	0.182	0.127	0.036	0.112	0.003	0.007	0.016	0.067	0.094	0.03	0.166	0.162	0.081	0.199	0.129	0.003	0.031	0.129	0.071	0.183	0.188	0.133	0.005	0.016	0.061	0.001	0.005	0.053	0.021	0	0
290	530	230	0.043	0.017	0.035	0.066	0.182	0.027	0.042	0.048	0.028	0.05	0.041	0.059	0.122	0.148	0.04	0.092	0.098	0.138	0.027	0.105	0.002	0.004	0.01	0.032	0.038	0.026	0.122	0.118	0.077	0.153	0.095	0.001	0.026	0.095	0.056	0.138	0.15	0.128	0.003	0.009	0.017	0.001	0.006	0.019	0.021	0	0
70	530	250	0.207	0.04	0.145	0.094	0.286	0.051	0.174	0.206	0.099	0.054	0.034	0.389	0.259	0.036	0.009	0.149	0.165	0.097	0.24	0.129	0.022	0.018	0.085	0.014	0.077	0.033	0.292	0.409	0.154	0.235	0.238	0.012	0.196	0.273	0.105	0.221	0.172	0.079	0.094	0.019	0.152	0.002	0.017	0.072	0.011	0.009	0
90	530	250	0.193	0.041	0.041	0.189	0.316	0.099	0.339	0.321	0.039	0.069	0.053	0.503	0.142	0.049	0.016	0.184	0.444	0.124	0.837	0.169	0.03	0.052	0.1	0.016	0.293	0.049	0.354	0.385	0.179	0.293	0.31	0.035	0.493	0.308	0.138	0.315	0.244	0.104	0.185	0.021	0.045	0.002	0.034	0.092	0.015	0.002	0
110	530	250	0.22	0.032	0.023	0.174	0.322	0.234	0.453	0.282	0.026	0.105	0.061	0.472	0.144	0.064	0.023	0.181	0.472	0.21	0.65	0.186	0.012	0.038	0.055	0.024	0.293	0.063	0.371	0.413	0.192	0.325	0.348	0.039	0.319	0.352	0.173	0.332	0.269	0.148	0.121	0.024	0.026	0.003	0.04	0.112	0.027	0.009	0
130	530	250	0.186	0.024	0.022	0.167	0.365	0.288	0.482	0.172	0.022	0.102	0.061	0.394	0.13	0.069	0.024	0.201	0.315	0.355	0.142	0.183	0.003	0.004	0.047	0.042	0.054	0.063	0.388	0.466	0.211	0.354	0.353	0.063	0.09	0.343	0.166	0.362	0.291	0.132	0.038	0.025	0.016	0.002	0.053	0.122	0.054	0.094	0
150	530	250	0.144	0.022	0.02	0.22	0.39	0.072	0.608	0.041	0.014	0.096	0.095	0.302	0.152	0.069	0.023	0.178	0.155	0.156	0.08	0.17	0.001	0.001	0.048	0.089	0.054	0.053	0.351	0.483	0.192	0.324	0.313	0.098	0.053	0.32	0.151	0.343	0.269	0.133	0.025	0.02	0.019	0.002	0.007	0.013	0.055	0.049	0
170	530	250	0.12	0.015	0.019	0.225	0.384	0.037	0.504	0.02	0.016	0.093	0.116	0.24	0.151	0.077	0.024	0.167	0.132	0.123	0.067	0.16	0.001	0.001	0.037	0.108	0.092	0.052	0.314	0.478	0.176	0.307	0.283	0.101	0.05	0.297	0.14	0.319	0.239	0.139	0.013	0.026	0.021	0.002	0.019	0.012	0.067	0.012	0.001
190	530	250	0.105	0.016	0.018	0.211	0.385	0.037	0.44	0.016	0.014	0.087	0.092	0.208	0.135	0.097	0.028	0.138	0.136	0.1	0.058	0.15	0.001	0.003	0.028	0.1	0.091	0.046	0.28	0.345	0.157	0.289	0.294	0.078	0.046	0.289	0.127	0.292	0.207	0.13	0.006	0.025	0.024	0.002	0.011	0.036	0.071	0.005	0
210	530	250	0.085	0.015	0.017	0.229	0.354	0.045	0.398	0.018	0.012	0.096	0.131	0.217	0.141	0.114	0.054	0.116	0.144	0.093	0.05	0.13	0.001	0.005	0.025	0.124	0.131	0.047	0.242	0.295	0.129	0.264	0.261	0.033	0.044	0.207	0.112	0.25	0.172	0.121	0.005	0.023	0.021	0.004	0.005	0.034	0.055	0	0.001
230	530	250	0.074	0.017	0.019	0.182	0.315	0.038	0.418	0.016	0.012	0.1	0.108	0.204	0.139	0.126	0.079	0.1	0.139	0.104	0.043	0.112	0.001	0.009	0.022	0.11	0.177	0.037	0.209	0.246	0.104	0.227	0.2	0.02	0.036	0.172	0.096	0.206	0.146	0.118	0.002	0.018	0.017	0.004	0.004	0.024	0.042	0.001	0
250	530	250	0.061	0.017	0.024	0.139	0.252	0.036	0.33	0.015	0.013	0.081	0.078	0.176	0.14	0.163	0.088	0.088	0.131	0.121	0.038	0.103	0.001	0.006	0.016	0.088	0.165	0.031	0.18	0.172	0.086	0.203	0.158	0.008	0.032	0.147	0.077	0.197	0.138	0.121	0.002	0.017	0.018	0.002	0.003	0.022	0.03	0	0
270	530	250	0.049	0.015	0.039	0.119	0.216	0.047	0.227	0.022	0.015	0.076	0.062	0.151	0.144	0.213	0.095	0.081	0.144	0.137	0.035	0.092	0.001	0.005	0.016	0.087	0.131	0.025	0.16	0.156	0.072	0.187	0.13	0.004	0.03	0.126	0.069	0.174	0.136	0.119	0.003	0.018	0.024	0.001	0.003	0.028	0.02	0	0
290	530	250	0.042	0.015	0.042	0.084	0.193	0.044	0.119	0.033	0.018	0.065	0.05	0.097	0.129	0.187	0.073	0.088	0.14	0.145	0.031	0.081	0.002	0.004	0.012	0.081	0.08	0.026	0.136	0.137	0.063	0.172	0.108	0.002	0.037	0.109	0.061	0.152	0.121	0.114	0.005	0.013	0.02	0.003	0.012	0.018	0.016	0	0
70	530	270	0.256	0.05	0.075	0.1	0.404	0.121	0.439	0.322	0.036	0.076	0.084	0.574	0.145	0.045	0.013	0.19	0.49	0.111	0.308	0.157	0.146	0.047	0.177	0.008	0.123	0.06	0.359	0.433	0.167	0.301	0.28	0.027	0.561	0.337	0.136	0.278	0.206	0.095	0.207	0.029	0.048	0.005	0.046	0.061	0.026	0.001	0
90	530	270	0.254	0.032	0.02	0.127	0.403	0.224	0.458	0.315	0.039	0.084	0.082	0.503	0.102	0.047	0.017	0.179	0.528	0.118	0.409	0.155	0.048	0.04	0.226	0.007	0.146	0.053	0.345	0.348	0.192	0.316	0.276	0.021	0.465	0.305	0.138	0.295	0.235	0.106	0.171	0.025	0.029	0.003	0.063	0.075	0.037	0.01	0
110	530	270	0.211	0.025	0.017	0.119	0.347	0.156	0.438	0.213	0.021	0.087	0.06	0.384	0.112	0.057	0.029	0.15	0.351	0.194	0.381	0.147	0.013	0.025	0.091	0.016	0.178	0.061	0.301	0.316	0.165	0.287	0.27	0.029	0.301	0.301	0.144	0.243	0.209	0.118	0.109	0.025	0.011	0.002	0.01	0.037	0.03	0.059	0
130	530	270	0.155	0.018	0.016	0.132	0.395	0.083	0.703	0.057	0.016	0.077	0.036	0.317	0.111	0.051	0.019	0.156	0.16	0.151	0.083	0.146	0.003	0.001	0.065	0.068	0.039	0.064	0.306	0.353	0.167	0.28	0.276	0.081	0.061	0.281	0.129	0.26	0.221	0.106	0.031	0.02	0.002	0.001	0.011	0.016	0.048	0.079	0
150	530	270	0.124	0.014	0.016	0.214	0.371	0.035	0.715	0.023	0.01	0.085	0.044	0.283	0.134	0.062	0.019	0.144	0.13	0.166	0.065	0.139	0.001	0.001	0.098	0.132	0.045	0.045	0.279	0.386	0.151	0.262	0.249	0.079	0.044	0.263	0.12	0.261	0.208	0.113	0.013	0.021	0.007	0.001	0.005	0.002	0.042	0.017	0
170	530	270	0.11	0.012	0.016	0.237	0.326	0.038	0.648	0.021	0.016	0.081	0.049	0.248	0.129	0.074	0.023	0.136	0.133	0.132	0.058	0.138	0.001	0.001	0.068	0.15	0.083	0.046	0.257	0.397	0.131	0.252	0.233	0.064	0.041	0.247	0.111	0.248	0.188	0.11	0.008	0.021	0.013	0.002	0.007	0.002	0.04	0.003	0
190	530	270	0.084	0.011	0.015	0.219	0.307	0.048	0.561	0.015	0.011	0.079	0.053	0.217	0.121	0.085	0.028	0.117	0.127	0.092	0.052	0.128	0.001	0.001	0.038	0.147	0.11	0.04	0.237	0.295	0.118	0.242	0.245	0.056	0.039	0.248	0.102	0.238	0.163	0.105	0.004	0.017	0.015	0.001	0.004	0.004	0.047	0.001	0
210	530	270	0.071	0.011	0.014	0.189	0.298	0.045	0.539	0.015	0.009	0.081	0.082	0.198	0.136	0.109	0.041	0.104	0.119	0.093	0.046	0.118	0.001	0.004	0.029	0.146	0.138	0.04	0.212	0.26	0.102	0.226	0.223	0.03	0.044	0.182	0.093	0.212	0.142	0.106	0.002	0.02	0.017	0.003	0.008	0.01	0.048	0.01	0
230	530	270	0.062	0.011	0.014	0.15	0.276	0.03	0.487	0.012	0.008	0.083	0.069	0.18	0.128	0.119	0.06	0.09	0.105	0.117	0.039	0.101	0.001	0.006	0.017	0.095	0.149	0.032	0.182	0.217	0.087	0.204	0.164	0.018	0.035	0.152	0.08	0.182	0.121	0.105	0.002	0.016	0.015	0.001	0.004	0.007	0.035	0.002	0
250	530	270	0.056	0.011	0.014	0.133	0.233	0.03	0.359	0.011	0.009	0.073	0.052	0.159	0.117	0.127	0.075	0.08	0.099	0.133	0.037	0.091	0.001	0.004	0.014	0.095	0.152	0.028	0.164	0.157	0.073	0.195	0.144	0.008	0.03	0.131	0.071	0.175	0.11	0.11	0.001	0.016	0.014	0.001	0.002	0.007	0.03	0	0
270	530	270	0.046	0.011	0.016	0.126	0.207	0.044	0.284	0.013	0.008	0.068	0.047	0.139	0.12	0.148	0.095	0.078	0.107	0.15	0.033	0.083	0.001	0.003	0.015	0.091	0.14	0.024	0.148	0.146	0.064	0.175	0.125	0.003	0.026	0.118	0.065	0.166	0.103	0.111	0.002	0.012	0.012	0.001	0.003	0.01	0.02	0	0
290	530	270	0.039	0.013	0.022	0.1	0.194	0.057	0.186	0.018	0.011	0.061	0.045	0.105	0.123	0.173	0.073	0.084	0.114	0.152	0.03	0.082	0.001	0.003	0.011	0.072	0.106	0.023	0.133	0.137	0.057	0.168	0.107	0.001	0.028	0.107	0.061	0.148	0.098	0.107	0.005	0.009	0.013	0.006	0.009	0.011	0.015	0	0
70	530	290	0.251	0.052	0.021	0.076	0.446	0.119	0.498	0.25	0.028	0.066	0.051	0.383	0.151	0.075	0.015	0.155	0.407	0.13	0.144	0.107	0.14	0.029	0.202	0.006	0.09	0.046	0.245	0.31	0.11	0.242	0.181	0.036	0.306	0.262	0.111	0.165	0.141	0.059	0.146	0.036	0.023	0.007	0.066	0.032	0.034	0.001	0
90	530	290	0.2	0.024	0.012	0.075	0.514	0.149	0.452	0.238	0.029	0.053	0.039	0.366	0.076	0.047	0.016	0.141	0.39	0.115	0.109	0.108	0.114	0.027	0.169	0.004	0.074	0.041	0.214	0.237	0.113	0.241	0.183	0.015	0.322	0.215	0.091	0.144	0.138	0.055	0.122	0.028	0.029	0.003	0.032	0.018	0.028	0.003	0
110	530	290	0.163	0.017	0.011	0.078	0.328	0.049	0.519	0.13	0.02	0.074	0.037	0.318	0.077	0.047	0.024	0.117	0.271	0.114	0.083	0.106	0.027	0.011	0.077	0.031	0.058	0.068	0.202	0.227	0.113	0.23	0.181	0.036	0.219	0.212	0.095	0.141	0.133	0.077	0.064	0.025	0.009	0.001	0.004	0.002	0.03	0.076	0
130	530	290	0.116	0.013	0.012	0.13	0.318	0.032	0.822	0.023	0.012	0.059	0.03	0.254	0.088	0.05	0.016	0.112	0.118	0.104	0.055	0.108	0.003	0.001	0.072	0.065	0.027	0.037	0.201	0.25	0.114	0.204	0.19	0.055	0.042	0.194	0.088	0.157	0.142	0.072	0.003	0.018	0.002	0.001	0.013	0.001	0.039	0.051	0.001
150	530	290	0.097	0.011	0.013	0.174	0.328	0.027	0.79	0.015	0.009	0.061	0.037	0.238	0.087	0.066	0.018	0.11	0.083	0.089	0.053	0.111	0.001	0.001	0.051	0.126	0.043	0.036	0.221	0.304	0.109	0.206	0.185	0.052	0.036	0.201	0.089	0.177	0.152	0.079	0.001	0.017	0.008	0.001	0.003	0.001	0.033	0.005	0
170	530	290	0.091	0.01	0.014	0.235	0.283	0.025	0.793	0.013	0.009	0.066	0.041	0.206	0.096	0.085	0.021	0.111	0.076	0.08	0.05	0.119	0.001	0.003	0.031	0.174	0.095	0.038	0.221	0.338	0.103	0.211	0.184	0.046	0.035	0.208	0.089	0.19	0.155	0.094	0	0.017	0.01	0.002	0.004	0.001	0.03	0.002	0
190	530	290	0.07	0.01	0.013	0.193	0.264	0.025	0.647	0.012	0.011	0.067	0.044	0.184	0.104	0.087	0.038	0.114	0.088	0.096	0.046	0.113	0.001	0.002	0.021	0.142	0.106	0.041	0.204	0.254	0.095	0.208	0.178	0.036	0.033	0.219	0.086	0.196	0.144	0.095	0.001	0.017	0.011	0.001	0.004	0.003	0.034	0.001	0
210	530	290	0.064	0.012	0.013	0.168	0.256	0.031	0.449	0.013	0.008	0.08	0.076	0.176	0.129	0.117	0.096	0.111	0.096	0.117	0.043	0.104	0.001	0.004	0.019	0.149	0.119	0.037	0.193	0.247	0.083	0.2	0.162	0.021	0.041	0.162	0.086	0.184	0.122	0.097	0.003	0.02	0.012	0.004	0.004	0.009	0.037	0.001	0
230	530	290	0.059	0.013	0.013	0.127	0.271	0.037	0.396	0.015	0.009	0.084	0.068	0.168	0.12	0.12	0.109	0.091	0.095	0.131	0.04	0.095	0.001	0.007	0.015	0.103	0.125	0.033	0.178	0.217	0.075	0.19	0.145	0.014	0.036	0.137	0.075	0.168	0.109	0.101	0.001	0.018	0.008	0.002	0.003	0.007	0.032	0	0
250	530	290	0.054	0.013	0.013	0.117	0.227	0.034	0.335	0.014	0.009	0.071	0.048	0.141	0.106	0.121	0.097	0.08	0.088	0.15	0.035	0.086	0.001	0.005	0.012	0.098	0.111	0.027	0.159	0.146	0.067	0.175	0.126	0.006	0.031	0.119	0.068	0.169	0.1	0.107	0.001	0.015	0.008	0.001	0.002	0.008	0.025	0	0
270	530	290	0.044	0.012	0.016	0.111	0.204	0.037	0.281	0.012	0.008	0.06	0.042	0.116	0.106	0.13	0.082	0.075	0.083	0.155	0.031	0.083	0.001	0.003	0.012	0.074	0.105	0.022	0.139	0.135	0.06	0.166	0.112	0.002	0.025	0.108	0.061	0.158	0.099	0.115	0.002	0.011	0.009	0.001	0.002	0.01	0.018	0	0
290	530	290	0.037	0.013	0.022	0.079	0.189	0.033	0.167	0.016	0.013	0.051	0.04	0.08	0.111	0.133	0.051	0.074	0.084	0.164	0.028	0.08	0.001	0.002	0.009	0.047	0.086	0.023	0.12	0.125	0.052	0.153	0.099	0.001	0.021	0.095	0.056	0.138	0.095	0.125	0.006	0.008	0.014	0.011	0.015	0.008	0.013	0	0
150	550	150	0.138	0.021	0.029	0.543	0.338	0.129	0.45	0.129	0.032	0.184	0.204	0.586	0.297	0.123	0.045	0.212	0.422	0.146	1	0.209	0.01	0.02	0.193	0.439	0.454	0.137	0.523	0.502	0.314	0.425	0.369	0.039	0.525	0.421	0.185	0.44	0.359	0.199	0.461	0.028	0.02	0.005	0.008	0.057	0.018	0.011	0.001
170	550	150	0.14	0.022	0.026	0.509	0.355	0.126	0.407	0.099	0.027	0.199	0.215	0.486	0.338	0.149	0.068	0.205	0.376	0.185	0.674	0.197	0.004	0.037	0.108	0.347	0.364	0.097	0.463	0.462	0.278	0.391	0.345	0.04	0.317	0.403	0.177	0.407	0.329	0.215	0.283	0.028	0.024	0.003	0.014	0.034	0.017	0.002	0.003
130	550	170	0.2	0.028	0.031	0.507	0.565	0.232	0.454	0.081	0.046	0.163	0.135	0.678	0.228	0.121	0.055	0.26	0.434	0.13	0.431	0.247	0.01	0.005	0.675	0.279	0.215	0.098	0.63	0.587	0.376	0.485	0.526	0.066	0.352	0.534	0.238	0.539	0.486	0.214	0.469	0.03	0.019	0.003	0.035	0.074	0.04	0	0.012
150	550	170	0.154	0.024	0.031	0.445	0.704	0.12	0.392	0.061	0.043	0.233	0.175	0.494	0.249	0.168	0.084	0.228	0.294	0.148	0.344	0.23	0.005	0.006	0.196	0.129	0.19	0.095	0.558	0.579	0.337	0.477	0.476	0.086	0.265	0.462	0.205	0.495	0.421	0.209	0.2	0.044	0.024	0.003	0.012	0.044	0.04	0.007	0.004
170	550	170	0.146	0.024	0.027	0.511	0.545	0.158	0.424	0.063	0.028	0.245	0.212	0.423	0.281	0.178	0.107	0.208	0.292	0.148	0.362	0.212	0.004	0.012	0.097	0.202	0.223	0.098	0.476	0.525	0.301	0.416	0.404	0.056	0.212	0.392	0.182	0.443	0.359	0.219	0.173	0.04	0.019	0.003	0.026	0.018	0.032	0	0.002
190	550	170	0.125	0.023	0.021	0.483	0.453	0.186	0.301	0.049	0.023	0.185	0.166	0.33	0.28	0.147	0.06	0.168	0.279	0.109	0.315	0.176	0.002	0.025	0.083	0.2	0.208	0.08	0.368	0.356	0.224	0.339	0.314	0.027	0.163	0.328	0.149	0.365	0.27	0.215	0.159	0.022	0.031	0.002	0.01	0.011	0.02	0	0.005
90	550	190	0.317	0.053	0.079	0.252	0.373	0.132	0.385	0.105	0.042	0.106	0.084	0.553	0.186	0.049	0.025	0.212	0.265	0.161	0.281	0.185	0.022	0.007	0.419	0.22	0.096	0.052	0.413	0.476	0.263	0.33	0.374	0.048	0.307	0.313	0.161	0.317	0.298	0.12	0.448	0.013	0.042	0.003	0.013	0.064	0.03	0.015	0
110	550	190	0.244	0.036	0.032	0.415	0.622	0.352	0.599	0.103	0.054	0.155	0.092	0.677	0.211	0.085	0.049	0.284	0.472	0.151	0.312	0.24	0.018	0.008	0.68	0.437	0.133	0.083	0.622	0.623	0.392	0.477	0.539	0.039	0.413	0.462	0.253	0.512	0.481	0.185	0.481	0.03	0.022	0.002	0.147	0.117	0.022	0.001	0.004
130	550	190	0.21	0.03	0.042	0.408	0.589	0.163	0.467	0.046	0.049	0.127	0.098	0.606	0.168	0.098	0.049	0.273	0.304	0.139	0.137	0.246	0.008	0.004	0.268	0.258	0.051	0.123	0.597	0.629	0.383	0.499	0.575	0.093	0.254	0.475	0.238	0.524	0.497	0.214	0.358	0.034	0.039	0.002	0.015	0.119	0.04	0	0.009
150	550	190	0.156	0.026	0.034	0.474	0.841	0.09	0.297	0.034	0.037	0.242	0.178	0.441	0.244	0.192	0.071	0.24	0.234	0.16	0.126	0.231	0.003	0.006	0.107	0.195	0.045	0.073	0.562	0.644	0.337	0.488	0.544	0.088	0.124	0.432	0.213	0.51	0.432	0.262	0.154	0.045	0.039	0.003	0.012	0.083	0.046	0	0.019
170	550	190	0.152	0.027	0.033	0.458	0.736	0.115	0.332	0.045	0.026	0.237	0.238	0.393	0.272	0.249	0.09	0.209	0.271	0.148	0.124	0.211	0.002	0.013	0.066	0.181	0.093	0.086	0.471	0.559	0.291	0.431	0.489	0.06	0.125	0.373	0.183	0.454	0.359	0.217	0.1	0.045	0.033	0.003	0.012	0.037	0.045	0	0.008
190	550	190	0.161	0.026	0.023	0.363	0.576	0.173	0.363	0.043	0.021	0.187	0.222	0.314	0.239	0.177	0.07	0.165	0.25	0.114	0.09	0.187	0.002	0.055	0.08	0.125	0.124	0.07	0.375	0.383	0.219	0.368	0.376	0.033	0.092	0.339	0.156	0.372	0.288	0.205	0.072	0.042	0.021	0.003	0.01	0.036	0.04	0.003	0.002
210	550	190	0.148	0.023	0.023	0.228	0.385	0.092	0.279	0.047	0.021	0.159	0.218	0.236	0.23	0.208	0.076	0.135	0.225	0.117	0.062	0.177	0.001	0.109	0.059	0.101	0.095	0.071	0.282	0.245	0.163	0.297	0.278	0.017	0.068	0.251	0.136	0.289	0.224	0.195	0.029	0.022	0.021	0.002	0.008	0.035	0.029	0.004	0
90	550	210	0.325	0.048	0.044	0.231	0.5	0.306	0.53	0.171	0.047	0.131	0.085	0.644	0.184	0.07	0.034	0.259	0.401	0.201	0.285	0.203	0.015	0.012	0.32	0.087	0.088	0.066	0.525	0.597	0.338	0.409	0.508	0.058	0.466	0.505	0.188	0.434	0.346	0.129	0.487	0.025	0.032	0.008	0.155	0.1	0.021	0.028	0
110	550	210	0.255	0.036	0.028	0.269	0.479	0.303	0.45	0.104	0.05	0.109	0.083	0.55	0.161	0.081	0.04	0.255	0.389	0.266	0.214	0.22	0.01	0.006	0.344	0.215	0.1	0.171	0.513	0.541	0.337	0.428	0.512	0.044	0.375	0.491	0.239	0.425	0.374	0.155	0.443	0.034	0.025	0.002	0.097	0.14	0.099	0.021	0.01
130	550	210	0.186	0.029	0.03	0.391	0.716	0.115	0.353	0.04	0.043	0.121	0.282	0.522	0.145	0.304	0.046	0.254	0.274	0.402	0.108	0.233	0.006	0.003	0.089	0.385	0.103	0.118	0.544	0.588	0.349	0.463	0.578	0.106	0.184	0.453	0.212	0.477	0.41	0.212	0.286	0.036	0.062	0.002	0.013	0.111	0.052	0.003	0.191
150	550	210	0.153	0.031	0.031	0.443	0.883	0.087	0.364	0.036	0.025	0.194	0.452	0.427	0.212	0.447	0.064	0.232	0.266	0.313	0.108	0.229	0.005	0.002	0.132	0.46	0.184	0.068	0.528	0.611	0.308	0.456	0.517	0.083	0.257	0.428	0.207	0.483	0.385	0.258	0.196	0.037	0.074	0.002	0.016	0.052	0.054	0	0.199
170	550	210	0.142	0.03	0.032	0.424	0.766	0.111	0.356	0.041	0.034	0.188	0.42	0.37	0.224	0.268	0.084	0.194	0.229	0.143	0.091	0.197	0.002	0.005	0.068	0.321	0.222	0.068	0.449	0.53	0.257	0.407	0.405	0.053	0.16	0.366	0.175	0.438	0.32	0.215	0.099	0.036	0.056	0.002	0.008	0.052	0.047	0	0.017
190	550	210	0.137	0.027	0.025	0.31	0.514	0.078	0.322	0.04	0.02	0.156	0.383	0.313	0.214	0.199	0.096	0.154	0.216	0.111	0.063	0.175	0.001	0.037	0.05	0.195	0.18	0.069	0.344	0.349	0.194	0.365	0.332	0.035	0.087	0.314	0.144	0.331	0.258	0.202	0.049	0.032	0.031	0.003	0.007	0.032	0.048	0	0
210	550	210	0.135	0.024	0.026	0.216	0.378	0.05	0.245	0.042	0.017	0.163	0.354	0.272	0.218	0.216	0.123	0.123	0.215	0.104	0.053	0.145	0.001	0.09	0.034	0.127	0.136	0.058	0.273	0.259	0.147	0.287	0.249	0.018	0.074	0.227	0.135	0.271	0.226	0.179	0.024	0.024	0.017	0.003	0.006	0.027	0.035	0	0
230	550	210	0.131	0.018	0.018	0.138	0.288	0.047	0.188	0.036	0.015	0.122	0.2	0.204	0.176	0.168	0.125	0.104	0.16	0.112	0.044	0.112	0.001	0.075	0.024	0.109	0.102	0.044	0.209	0.199	0.114	0.233	0.182	0.007	0.063	0.169	0.102	0.211	0.182	0.147	0.011	0.019	0.008	0.002	0.005	0.021	0.024	0	0
70	550	230	0.367	0.048	0.062	0.142	0.282	0.113	0.38	0.202	0.045	0.092	0.049	0.541	0.154	0.052	0.025	0.207	0.272	0.144	0.184	0.189	0.019	0.014	0.491	0.02	0.051	0.05	0.383	0.599	0.19	0.322	0.367	0.019	0.42	0.37	0.135	0.275	0.265	0.092	0.34	0.015	0.026	0.002	0.097	0.057	0.009	0.112	0.01
90	550	230	0.285	0.048	0.025	0.198	0.372	0.293	0.473	0.189	0.059	0.111	0.07	0.621	0.156	0.067	0.037	0.246	0.403	0.129	0.354	0.211	0.016	0.015	0.206	0.036	0.145	0.064	0.451	0.545	0.262	0.402	0.492	0.04	0.429	0.485	0.178	0.41	0.351	0.128	0.374	0.023	0.026	0.007	0.112	0.13	0.017	0.063	0.002
110	550	230	0.236	0.036	0.023	0.249	0.445	0.218	0.312	0.106	0.043	0.082	0.099	0.478	0.142	0.127	0.044	0.217	0.34	0.162	0.204	0.213	0.008	0.003	0.101	0.137	0.17	0.142	0.435	0.488	0.265	0.396	0.454	0.053	0.362	0.427	0.173	0.37	0.328	0.136	0.321	0.026	0.034	0.002	0.032	0.098	0.039	0.019	0.069
130	550	230	0.176	0.028	0.026	0.388	0.615	0.095	0.384	0.048	0.025	0.113	0.456	0.446	0.134	0.429	0.115	0.22	0.295	0.163	0.093	0.22	0.004	0.001	0.086	0.373	0.231	0.099	0.486	0.535	0.294	0.449	0.488	0.127	0.127	0.444	0.192	0.42	0.364	0.161	0.139	0.03	0.065	0.002	0.008	0.024	0.068	0.009	0.182
150	550	230	0.151	0.025	0.025	0.453	0.653	0.162	0.356	0.049	0.019	0.147	0.56	0.4	0.182	0.243	0.121	0.202	0.313	0.139	0.095	0.209	0.002	0.002	0.091	0.324	0.342	0.076	0.46	0.553	0.266	0.415	0.42	0.093	0.113	0.397	0.183	0.415	0.325	0.179	0.104	0.031	0.062	0.005	0.013	0.031	0.059	0	0.163
170	550	230	0.133	0.025	0.023	0.32	0.471	0.105	0.286	0.041	0.02	0.141	0.41	0.316	0.185	0.118	0.139	0.161	0.226	0.111	0.079	0.18	0.002	0.002	0.056	0.22	0.283	0.06	0.372	0.483	0.22	0.359	0.351	0.054	0.075	0.325	0.159	0.371	0.269	0.164	0.033	0.032	0.046	0.004	0.028	0.036	0.06	0.005	0.01
190	550	230	0.12	0.018	0.023	0.259	0.43	0.062	0.218	0.035	0.016	0.118	0.287	0.273	0.173	0.147	0.162	0.133	0.18	0.095	0.055	0.148	0.001	0.01	0.035	0.203	0.176	0.054	0.287	0.312	0.165	0.296	0.275	0.032	0.061	0.271	0.124	0.286	0.206	0.168	0.017	0.027	0.028	0.003	0.019	0.043	0.055	0.008	0
210	550	230	0.097	0.017	0.026	0.231	0.365	0.056	0.147	0.034	0.017	0.129	0.301	0.258	0.177	0.18	0.223	0.118	0.196	0.1	0.049	0.129	0.001	0.024	0.029	0.172	0.169	0.051	0.243	0.245	0.132	0.272	0.239	0.017	0.063	0.2	0.127	0.247	0.178	0.155	0.017	0.021	0.02	0.004	0.008	0.055	0.038	0	0
230	550	230	0.089	0.015	0.03	0.181	0.305	0.052	0.175	0.035	0.017	0.119	0.225	0.224	0.172	0.22	0.216	0.096	0.202	0.104	0.044	0.116	0.001	0.03	0.023	0.156	0.148	0.041	0.208	0.209	0.109	0.245	0.194	0.008	0.059	0.171	0.117	0.215	0.159	0.141	0.014	0.017	0.02	0.003	0.004	0.044	0.026	0	0
250	550	230	0.079	0.014	0.049	0.126	0.258	0.05	0.131	0.042	0.02	0.092	0.124	0.18	0.184	0.304	0.192	0.092	0.186	0.125	0.039	0.109	0.002	0.017	0.018	0.1	0.123	0.037	0.179	0.176	0.092	0.204	0.147	0.005	0.045	0.143	0.082	0.189	0.168	0.13	0.007	0.013	0.039	0.002	0.003	0.042	0.02	0	0
270	550	230	0.051	0.014	0.051	0.093	0.179	0.033	0.051	0.052	0.028	0.057	0.053	0.106	0.153	0.204	0.128	0.094	0.137	0.165	0.03	0.106	0.002	0.005	0.012	0.05	0.055	0.035	0.136	0.129	0.074	0.169	0.107	0.002	0.03	0.105	0.063	0.166	0.158	0.119	0.002	0.007	0.037	0.001	0.002	0.024	0.018	0	0
70	550	250	0.425	0.064	0.03	0.21	0.397	0.24	0.42	0.299	0.059	0.118	0.081	0.704	0.165	0.071	0.03	0.248	0.456	0.153	0.274	0.206	0.037	0.018	0.556	0.009	0.103	0.051	0.508	0.795	0.273	0.419	0.516	0.036	0.62	0.419	0.191	0.386	0.372	0.102	0.348	0.012	0.025	0.002	0.147	0.079	0.014	0.107	0
90	550	250	0.287	0.043	0.023	0.309	0.332	0.243	0.302	0.268	0.059	0.092	0.072	0.578	0.15	0.057	0.032	0.21	0.448	0.133	0.55	0.194	0.023	0.016	0.162	0.016	0.242	0.053	0.43	0.495	0.247	0.354	0.428	0.042	0.453	0.373	0.182	0.363	0.338	0.102	0.297	0.018	0.026	0.005	0.164	0.098	0.018	0.007	0.005
110	550	250	0.201	0.034	0.02	0.268	0.433	0.152	0.354	0.159	0.03	0.064	0.082	0.458	0.116	0.067	0.063	0.181	0.337	0.132	0.311	0.194	0.011	0.006	0.073	0.092	0.222	0.089	0.391	0.416	0.218	0.348	0.391	0.064	0.285	0.341	0.162	0.305	0.312	0.108	0.228	0.025	0.035	0.002	0.011	0.025	0.058	0.01	0.003
130	550	250	0.174	0.026	0.023	0.329	0.522	0.076	0.393	0.067	0.025	0.096	0.28	0.388	0.13	0.091	0.259	0.186	0.206	0.139	0.084	0.2	0.004	0.001	0.064	0.202	0.253	0.066	0.427	0.468	0.236	0.384	0.4	0.131	0.067	0.386	0.169	0.344	0.332	0.134	0.056	0.026	0.054	0.002	0.007	0.017	0.07	0.006	0.003
150	550	250	0.139	0.017	0.02	0.33	0.382	0.089	0.265	0.046	0.013	0.115	0.443	0.329	0.147	0.076	0.433	0.161	0.206	0.127	0.088	0.182	0.001	0.002	0.064	0.212	0.308	0.059	0.378	0.475	0.205	0.345	0.329	0.092	0.059	0.336	0.151	0.329	0.272	0.131	0.024	0.023	0.028	0.002	0.007	0.033	0.054	0.001	0.006
170	550	250	0.115	0.014	0.019	0.277	0.319	0.088	0.182	0.04	0.011	0.12	0.442	0.276	0.155	0.088	0.42	0.14	0.195	0.105	0.073	0.162	0.001	0.001	0.038	0.18	0.245	0.059	0.322	0.428	0.174	0.311	0.285	0.061	0.049	0.291	0.131	0.308	0.227	0.135	0.018	0.024	0.022	0.002	0.008	0.032	0.06	0.001	0.006
190	550	250	0.103	0.012	0.017	0.242	0.333	0.056	0.19	0.024	0.011	0.1	0.265	0.243	0.146	0.101	0.283	0.119	0.156	0.103	0.051	0.141	0.001	0.003	0.026	0.209	0.173	0.047	0.273	0.286	0.146	0.272	0.239	0.038	0.056	0.268	0.116	0.269	0.184	0.139	0.009	0.027	0.027	0.002	0.005	0.051	0.056	0.002	0
210	550	250	0.083	0.013	0.018	0.198	0.325	0.049	0.203	0.023	0.01	0.136	0.208	0.247	0.147	0.126	0.292	0.1	0.158	0.103	0.045	0.124	0.001	0.01	0.021	0.195	0.175	0.046	0.229	0.221	0.12	0.241	0.216	0.02	0.05	0.181	0.123	0.224	0.151	0.138	0.009	0.029	0.018	0.014	0.004	0.056	0.05	0	0
230	550	250	0.07	0.013	0.02	0.161	0.301	0.042	0.246	0.02	0.01	0.114	0.113	0.212	0.136	0.136	0.32	0.09	0.161	0.11	0.041	0.112	0.001	0.011	0.017	0.175	0.185	0.036	0.2	0.193	0.101	0.224	0.181	0.011	0.036	0.16	0.113	0.203	0.137	0.129	0.005	0.017	0.011	0.005	0.003	0.033	0.03	0	0
250	550	250	0.058	0.012	0.029	0.113	0.23	0.045	0.227	0.023	0.012	0.083	0.069	0.17	0.136	0.192	0.263	0.081	0.134	0.135	0.037	0.099	0.001	0.006	0.014	0.101	0.143	0.03	0.175	0.163	0.083	0.198	0.142	0.009	0.032	0.136	0.079	0.181	0.137	0.121	0.003	0.013	0.017	0.002	0.002	0.024	0.019	0	0
270	550	250	0.05	0.013	0.059	0.087	0.197	0.045	0.151	0.035	0.017	0.074	0.053	0.139	0.148	0.242	0.18	0.08	0.153	0.151	0.033	0.09	0.002	0.004	0.013	0.074	0.095	0.026	0.149	0.147	0.07	0.176	0.117	0.004	0.03	0.116	0.066	0.158	0.146	0.115	0.003	0.011	0.034	0.001	0.003	0.032	0.015	0	0
70	550	270	0.318	0.06	0.02	0.182	0.348	0.244	0.325	0.296	0.072	0.105	0.076	0.639	0.146	0.069	0.029	0.218	0.466	0.162	0.259	0.181	0.07	0.011	0.394	0.007	0.099	0.064	0.452	0.684	0.272	0.37	0.451	0.03	0.582	0.409	0.176	0.334	0.317	0.108	0.306	0.016	0.024	0.005	0.249	0.057	0.03	0.027	0
90	550	270	0.242	0.043	0.02	0.305	0.324	0.133	0.272	0.273	0.044	0.066	0.052	0.502	0.143	0.052	0.025	0.175	0.413	0.122	0.667	0.15	0.06	0.016	0.12	0.008	0.281	0.049	0.349	0.348	0.2	0.31	0.303	0.039	0.498	0.294	0.141	0.246	0.241	0.085	0.251	0.019	0.028	0.002	0.147	0.029	0.016	0.022	0
110	550	270	0.163	0.033	0.016	0.255	0.352	0.054	0.458	0.145	0.02	0.052	0.03	0.408	0.092	0.04	0.037	0.15	0.299	0.116	0.278	0.156	0.011	0.011	0.08	0.126	0.244	0.066	0.325	0.327	0.173	0.278	0.288	0.07	0.232	0.284	0.127	0.215	0.23	0.081	0.15	0.022	0.035	0.002	0.047	0.005	0.034	0.022	0.015
130	550	270	0.145	0.02	0.018	0.278	0.487	0.055	0.623	0.038	0.017	0.07	0.041	0.327	0.1	0.051	0.104	0.144	0.212	0.123	0.072	0.155	0.002	0.001	0.127	0.308	0.263	0.049	0.337	0.358	0.176	0.286	0.299	0.085	0.052	0.304	0.129	0.248	0.246	0.098	0.022	0.02	0.039	0.002	0.004	0.014	0.044	0.002	0.001
150	550	270	0.121	0.012	0.015	0.302	0.359	0.079	0.438	0.024	0.01	0.078	0.054	0.285	0.118	0.058	0.245	0.129	0.188	0.11	0.072	0.15	0.001	0.001	0.115	0.289	0.27	0.045	0.304	0.394	0.151	0.271	0.261	0.066	0.042	0.274	0.119	0.237	0.218	0.103	0.011	0.019	0.034	0.001	0.005	0.008	0.049	0.002	0.001
170	550	270	0.11	0.01	0.015	0.199	0.263	0.066	0.379	0.02	0.009	0.081	0.064	0.25	0.121	0.066	0.345	0.119	0.168	0.088	0.061	0.138	0.001	0.001	0.046	0.276	0.262	0.041	0.265	0.365	0.129	0.252	0.236	0.047	0.039	0.246	0.108	0.235	0.184	0.111	0.006	0.018	0.016	0.002	0.012	0.008	0.054	0	0
190	550	270	0.086	0.01	0.014	0.17	0.249	0.067	0.35	0.018	0.008	0.077	0.077	0.233	0.123	0.078	0.37	0.105	0.143	0.083	0.046	0.124	0.001	0.001	0.019	0.23	0.214	0.037	0.238	0.261	0.116	0.236	0.218	0.029	0.038	0.247	0.097	0.225	0.156	0.12	0.005	0.019	0.012	0.001	0.004	0.012	0.049	0.001	0.001
210	550	270	0.071	0.01	0.014	0.179	0.231	0.059	0.325	0.018	0.008	0.085	0.085	0.204	0.121	0.09	0.325	0.092	0.129	0.095	0.041	0.109	0.001	0.002	0.016	0.171	0.183	0.035	0.206	0.194	0.101	0.211	0.195	0.019	0.036	0.168	0.087	0.204	0.13	0.12	0.004	0.017	0.01	0.001	0.004	0.021	0.043	0	0
230	550	270	0.059	0.01	0.014	0.13	0.218	0.038	0.297	0.015	0.008	0.086	0.066	0.174	0.117	0.103	0.289	0.08	0.108	0.126	0.037	0.097	0.001	0.003	0.014	0.13	0.165	0.03	0.177	0.165	0.085	0.194	0.159	0.015	0.03	0.142	0.079	0.178	0.114	0.115	0.001	0.015	0.007	0.001	0.002	0.012	0.031	0	0
250	550	270	0.052	0.01	0.015	0.11	0.207	0.037	0.27	0.013	0.009	0.079	0.055	0.15	0.115	0.13	0.23	0.077	0.102	0.151	0.034	0.088	0.001	0.003	0.013	0.098	0.148	0.025	0.157	0.152	0.073	0.178	0.135	0.008	0.028	0.126	0.071	0.165	0.107	0.112	0.001	0.011	0.006	0.001	0.002	0.007	0.02	0	0
270	550	270	0.044	0.011	0.021	0.099	0.191	0.041	0.235	0.013	0.009	0.078	0.05	0.13	0.115	0.16	0.169	0.072	0.106	0.155	0.031	0.082	0.001	0.003	0.013	0.086	0.127	0.023	0.148	0.144	0.063	0.172	0.112	0.003	0.028	0.11	0.064	0.152	0.102	0.108	0.002	0.01	0.01	0.002	0.002	0.01	0.015	0	0
290	550	270	0.038	0.013	0.023	0.068	0.184	0.041	0.121	0.017	0.011	0.065	0.043	0.084	0.108	0.152	0.103	0.08	0.108	0.162	0.026	0.072	0.001	0.002	0.01	0.069	0.083	0.021	0.123	0.124	0.055	0.156	0.097	0.001	0.034	0.093	0.056	0.128	0.091	0.102	0.004	0.008	0.008	0.005	0.005	0.007	0.015	0	0
70	550	290	0.265	0.062	0.012	0.154	0.308	0.128	0.207	0.257	0.035	0.079	0.057	0.357	0.128	0.109	0.022	0.145	0.298	0.185	0.13	0.125	0.107	0.01	0.273	0.005	0.088	0.054	0.289	0.522	0.132	0.282	0.247	0.057	0.415	0.22	0.132	0.165	0.171	0.061	0.19	0.044	0.015	0.008	0.114	0.026	0.058	0.045	0
90	550	290	0.172	0.025	0.012	0.181	0.255	0.052	0.129	0.213	0.024	0.043	0.042	0.352	0.073	0.047	0.021	0.113	0.303	0.102	0.434	0.099	0.093	0.007	0.125	0.004	0.197	0.038	0.217	0.222	0.11	0.234	0.176	0.031	0.373	0.166	0.089	0.111	0.126	0.05	0.139	0.022	0.013	0.002	0.013	0.004	0.017	0.087	0
110	550	290	0.122	0.018	0.011	0.197	0.323	0.029	0.403	0.095	0.015	0.046	0.027	0.323	0.064	0.039	0.042	0.104	0.204	0.117	0.186	0.104	0.02	0.002	0.058	0.132	0.153	0.044	0.204	0.209	0.105	0.21	0.165	0.035	0.135	0.171	0.079	0.112	0.129	0.054	0.07	0.022	0.016	0.001	0.008	0.001	0.027	0.008	0
130	550	290	0.111	0.015	0.012	0.206	0.304	0.057	0.554	0.035	0.014	0.067	0.034	0.272	0.081	0.045	0.122	0.102	0.152	0.156	0.055	0.113	0.002	0.002	0.043	0.233	0.177	0.038	0.219	0.233	0.109	0.21	0.195	0.042	0.039	0.189	0.085	0.141	0.145	0.068	0.003	0.016	0.034	0.001	0.003	0.001	0.034	0	0
150	550	290	0.096	0.011	0.012	0.217	0.253	0.049	0.46	0.026	0.009	0.085	0.042	0.233	0.095	0.059	0.219	0.1	0.11	0.159	0.061	0.114	0.001	0.001	0.036	0.268	0.198	0.038	0.222	0.299	0.1	0.199	0.185	0.032	0.033	0.194	0.086	0.158	0.153	0.09	0.001	0.016	0.032	0.001	0.004	0.001	0.033	0	0
170	550	290	0.089	0.01	0.012	0.2	0.246	0.034	0.395	0.019	0.008	0.084	0.045	0.191	0.101	0.068	0.294	0.101	0.09	0.116	0.053	0.113	0.001	0.001	0.016	0.237	0.192	0.037	0.217	0.305	0.095	0.197	0.179	0.023	0.031	0.197	0.086	0.178	0.145	0.095	0	0.018	0.019	0.001	0.005	0.001	0.039	0	0
190	550	290	0.085	0.011	0.012	0.147	0.222	0.029	0.352	0.017	0.011	0.075	0.054	0.169	0.11	0.091	0.338	0.096	0.089	0.103	0.041	0.11	0.001	0.001	0.014	0.198	0.153	0.035	0.208	0.217	0.09	0.195	0.162	0.016	0.032	0.209	0.082	0.178	0.129	0.11	0.001	0.016	0.009	0.004	0.005	0.005	0.04	0	0.001
210	550	290	0.068	0.012	0.013	0.141	0.24	0.033	0.313	0.014	0.009	0.092	0.092	0.17	0.127	0.116	0.31	0.085	0.096	0.122	0.037	0.098	0.001	0.003	0.013	0.171	0.14	0.031	0.191	0.164	0.08	0.19	0.156	0.013	0.038	0.145	0.079	0.174	0.113	0.112	0.002	0.017	0.008	0.002	0.004	0.008	0.042	0	0
230	550	290	0.064	0.012	0.012	0.111	0.246	0.026	0.326	0.013	0.009	0.089	0.067	0.145	0.109	0.114	0.224	0.076	0.086	0.151	0.035	0.09	0.001	0.005	0.013	0.1	0.129	0.028	0.163	0.144	0.072	0.179	0.132	0.011	0.037	0.125	0.073	0.162	0.099	0.108	0.001	0.015	0.006	0.002	0.003	0.005	0.029	0	0
250	550	290	0.056	0.011	0.012	0.106	0.197	0.031	0.282	0.013	0.008	0.084	0.054	0.129	0.104	0.124	0.153	0.071	0.087	0.159	0.033	0.078	0.001	0.004	0.011	0.086	0.121	0.023	0.149	0.134	0.064	0.173	0.116	0.006	0.033	0.109	0.065	0.15	0.092	0.105	0.001	0.009	0.006	0.002	0.002	0.004	0.018	0	0
270	550	290	0.044	0.011	0.021	0.095	0.188	0.031	0.226	0.015	0.008	0.074	0.045	0.11	0.104	0.125	0.108	0.068	0.091	0.163	0.029	0.075	0.001	0.003	0.011	0.077	0.108	0.021	0.137	0.13	0.057	0.168	0.105	0.002	0.027	0.098	0.06	0.141	0.088	0.105	0.002	0.009	0.009	0.004	0.002	0.004	0.015	0	0
290	550	290	0.036	0.012	0.029	0.058	0.179	0.029	0.105	0.023	0.01	0.061	0.038	0.072	0.106	0.116	0.071	0.063	0.092	0.179	0.025	0.067	0.001	0.002	0.009	0.055	0.066	0.019	0.111	0.115	0.05	0.146	0.091	0.001	0.024	0.084	0.053	0.117	0.08	0.099	0.004	0.009	0.012	0.015	0.016	0.004	0.011	0	0
150	570	150	0.156	0.034	0.034	0.369	0.386	0.1	0.361	0.087	0.022	0.255	0.233	0.619	0.302	0.176	0.096	0.192	0.347	0.145	0.355	0.234	0.006	0.034	0.113	0.192	0.207	0.111	0.509	0.425	0.335	0.425	0.43	0.074	0.301	0.4	0.208	0.385	0.373	0.211	0.25	0.022	0.022	0.006	0.006	0.03	0.018	0.022	0.002
110	570	170	0.203	0.039	0.027	0.554	0.373	0.124	0.603	0.082	0.027	0.091	0.097	0.761	0.303	0.074	0.036	0.215	0.535	0.11	0.621	0.251	0.04	0.003	0.414	0.689	0.3	0.232	0.551	0.471	0.384	0.445	0.509	0.029	0.576	0.447	0.233	0.433	0.427	0.178	0.656	0.014	0.017	0.002	0.008	0.045	0.013	0	0.004
130	570	170	0.203	0.035	0.038	0.758	0.742	0.131	0.507	0.08	0.037	0.159	0.195	0.796	0.302	0.13	0.058	0.247	0.4	0.124	0.42	0.277	0.014	0.022	0.293	0.587	0.288	0.08	0.713	0.549	0.474	0.571	0.64	0.071	0.398	0.572	0.258	0.536	0.533	0.247	0.366	0.039	0.062	0.007	0.013	0.054	0.04	0.002	0.089
150	570	170	0.195	0.041	0.031	0.464	0.788	0.111	0.385	0.073	0.034	0.332	0.288	0.619	0.317	0.234	0.143	0.227	0.276	0.178	0.179	0.245	0.009	0.036	0.159	0.38	0.166	0.109	0.594	0.489	0.385	0.51	0.564	0.089	0.22	0.487	0.234	0.482	0.453	0.229	0.18	0.052	0.047	0.013	0.017	0.024	0.05	0.004	0.03
170	570	170	0.188	0.038	0.023	0.389	0.671	0.147	0.258	0.051	0.031	0.264	0.279	0.377	0.299	0.272	0.149	0.196	0.232	0.24	0.143	0.21	0.003	0.024	0.112	0.311	0.134	0.107	0.426	0.381	0.293	0.384	0.392	0.055	0.158	0.361	0.169	0.37	0.317	0.21	0.127	0.03	0.033	0.004	0.015	0.011	0.034	0.002	0.004
110	570	190	0.251	0.047	0.036	0.591	0.561	0.135	0.617	0.096	0.043	0.11	0.107	0.834	0.287	0.076	0.05	0.293	0.529	0.328	0.401	0.283	0.061	0.007	0.442	0.854	0.223	0.36	0.764	0.662	0.555	0.601	0.708	0.055	0.772	0.513	0.276	0.564	0.604	0.225	0.638	0.027	0.04	0.001	0.011	0.098	0.032	0	0.139
130	570	190	0.184	0.041	0.045	0.565	0.799	0.086	0.294	0.06	0.034	0.216	0.124	0.589	0.232	0.155	0.094	0.251	0.274	0.131	0.137	0.278	0.016	0.024	0.103	0.63	0.131	0.084	0.665	0.584	0.47	0.639	0.74	0.12	0.256	0.527	0.252	0.564	0.554	0.23	0.195	0.032	0.11	0.003	0.009	0.161	0.042	0	0.127
150	570	190	0.176	0.044	0.033	0.506	0.824	0.111	0.277	0.056	0.034	0.304	0.28	0.5	0.293	0.26	0.176	0.213	0.253	0.183	0.126	0.24	0.003	0.028	0.135	0.552	0.181	0.088	0.572	0.487	0.372	0.503	0.553	0.073	0.235	0.449	0.217	0.485	0.433	0.221	0.127	0.041	0.077	0.01	0.013	0.061	0.048	0	0.038
170	570	190	0.196	0.045	0.025	0.395	0.691	0.162	0.238	0.052	0.033	0.24	0.33	0.358	0.272	0.255	0.239	0.189	0.204	0.159	0.1	0.199	0.002	0.012	0.094	0.389	0.215	0.094	0.413	0.412	0.266	0.378	0.386	0.045	0.159	0.34	0.168	0.379	0.321	0.208	0.085	0.043	0.037	0.003	0.015	0.024	0.048	0	0.014
190	570	190	0.157	0.029	0.017	0.232	0.434	0.143	0.2	0.036	0.022	0.166	0.197	0.249	0.218	0.153	0.177	0.137	0.172	0.1	0.07	0.162	0.001	0.038	0.058	0.186	0.154	0.059	0.277	0.297	0.185	0.275	0.261	0.023	0.074	0.261	0.121	0.265	0.221	0.183	0.056	0.017	0.029	0.002	0.005	0.012	0.027	0	0.003
90	570	210	0.364	0.063	0.029	0.485	0.713	0.194	0.691	0.242	0.056	0.153	0.115	1	0.247	0.078	0.049	0.292	0.569	0.193	0.49	0.259	0.09	0.008	0.437	0.514	0.194	0.077	0.729	0.732	0.494	0.564	0.644	0.034	0.952	0.543	0.26	0.509	0.466	0.173	1	0.024	0.007	0.003	0.046	0.069	0.097	0.289	0
110	570	210	0.258	0.045	0.046	0.525	0.718	0.126	0.398	0.099	0.051	0.105	0.124	0.71	0.19	0.082	0.193	0.288	0.359	0.604	0.175	0.273	0.049	0.016	0.195	0.728	0.158	0.155	0.693	0.632	0.484	0.6	0.646	0.085	0.711	0.551	0.31	0.526	0.511	0.209	0.445	0.028	0.076	0.001	0.009	0.17	0.092	0.022	0.109
130	570	210	0.182	0.033	0.048	0.486	0.727	0.084	0.189	0.054	0.035	0.196	0.157	0.496	0.236	0.172	0.434	0.228	0.208	0.333	0.117	0.266	0.004	0.019	0.096	0.447	0.197	0.068	0.589	0.539	0.381	0.576	0.608	0.12	0.244	0.485	0.224	0.5	0.439	0.228	0.066	0.035	0.08	0.002	0.008	0.18	0.062	0	0.149
150	570	210	0.171	0.039	0.037	0.44	0.634	0.093	0.215	0.045	0.028	0.208	0.29	0.417	0.245	0.289	0.456	0.199	0.225	0.253	0.108	0.23	0.005	0.012	0.081	0.57	0.215	0.08	0.505	0.453	0.313	0.455	0.487	0.064	0.268	0.407	0.197	0.44	0.373	0.223	0.077	0.039	0.048	0.003	0.01	0.064	0.052	0	0.066
170	570	210	0.182	0.035	0.028	0.395	0.553	0.127	0.202	0.048	0.023	0.182	0.369	0.366	0.231	0.245	0.5	0.167	0.244	0.2	0.09	0.189	0.002	0.007	0.065	0.422	0.264	0.07	0.392	0.435	0.232	0.363	0.358	0.047	0.142	0.325	0.162	0.363	0.288	0.21	0.065	0.036	0.033	0.003	0.009	0.025	0.045	0	0.007
190	570	210	0.159	0.027	0.019	0.211	0.374	0.1	0.232	0.046	0.017	0.155	0.282	0.265	0.204	0.179	0.337	0.13	0.193	0.096	0.059	0.169	0.001	0.027	0.048	0.16	0.176	0.058	0.292	0.329	0.172	0.286	0.258	0.027	0.075	0.277	0.131	0.283	0.226	0.215	0.024	0.024	0.012	0.004	0.006	0.009	0.037	0	0
210	570	210	0.123	0.019	0.02	0.125	0.265	0.047	0.199	0.045	0.015	0.162	0.252	0.223	0.202	0.209	0.222	0.102	0.194	0.107	0.044	0.132	0.001	0.098	0.028	0.105	0.103	0.052	0.227	0.217	0.129	0.233	0.205	0.01	0.066	0.214	0.119	0.218	0.186	0.173	0.013	0.013	0.006	0.002	0.002	0.005	0.017	0	0
90	570	230	0.367	0.05	0.028	0.302	0.562	0.262	0.715	0.225	0.085	0.141	0.118	0.886	0.218	0.081	0.072	0.276	0.497	0.166	0.209	0.28	0.093	0.012	0.628	0.289	0.059	0.069	0.636	0.702	0.423	0.544	0.601	0.026	0.95	0.584	0.23	0.479	0.474	0.161	0.693	0.024	0.014	0.004	0.032	0.092	0.015	0.083	0
110	570	230	0.244	0.041	0.042	0.435	0.634	0.143	0.236	0.099	0.042	0.1	0.172	0.567	0.139	0.119	0.448	0.235	0.278	0.378	0.122	0.258	0.037	0.005	0.212	0.687	0.221	0.133	0.576	0.539	0.356	0.496	0.564	0.124	0.466	0.525	0.233	0.447	0.414	0.177	0.242	0.031	0.062	0.001	0.01	0.166	0.059	0.026	0.247
130	570	230	0.179	0.026	0.032	0.35	0.419	0.071	0.249	0.044	0.027	0.159	0.45	0.421	0.192	0.248	0.624	0.191	0.192	0.321	0.098	0.228	0.005	0.004	0.069	0.465	0.25	0.082	0.512	0.467	0.296	0.455	0.483	0.13	0.298	0.446	0.193	0.414	0.351	0.178	0.074	0.041	0.025	0.002	0.012	0.09	0.073	0	0.08
150	570	230	0.16	0.031	0.023	0.319	0.373	0.083	0.156	0.042	0.026	0.159	0.45	0.354	0.195	0.227	0.627	0.175	0.207	0.27	0.095	0.204	0.002	0.003	0.044	0.393	0.229	0.075	0.435	0.389	0.248	0.397	0.401	0.103	0.232	0.369	0.171	0.369	0.305	0.174	0.044	0.039	0.025	0.003	0.012	0.046	0.068	0	0.031
170	570	230	0.161	0.028	0.039	0.334	0.343	0.1	0.084	0.04	0.022	0.141	0.374	0.325	0.189	0.171	0.628	0.146	0.237	0.125	0.081	0.184	0.001	0.004	0.046	0.4	0.212	0.059	0.35	0.391	0.207	0.341	0.318	0.058	0.114	0.292	0.143	0.321	0.245	0.189	0.03	0.025	0.015	0.002	0.007	0.058	0.056	0	0.002
190	570	230	0.144	0.021	0.031	0.234	0.339	0.089	0.093	0.047	0.015	0.146	0.385	0.297	0.184	0.175	0.485	0.119	0.218	0.094	0.053	0.146	0.001	0.012	0.031	0.257	0.184	0.052	0.272	0.318	0.159	0.291	0.25	0.026	0.079	0.263	0.128	0.267	0.198	0.174	0.02	0.022	0.012	0.003	0.005	0.049	0.037	0	0.001
210	570	230	0.105	0.016	0.018	0.125	0.283	0.04	0.113	0.036	0.012	0.126	0.201	0.177	0.151	0.144	0.322	0.093	0.131	0.098	0.042	0.112	0.001	0.024	0.022	0.146	0.107	0.042	0.22	0.212	0.121	0.239	0.184	0.013	0.055	0.181	0.108	0.21	0.161	0.143	0.006	0.016	0.004	0.002	0.004	0.014	0.025	0.002	0.001
230	570	230	0.093	0.013	0.018	0.104	0.239	0.035	0.168	0.025	0.012	0.112	0.143	0.167	0.143	0.15	0.221	0.088	0.133	0.133	0.037	0.101	0.001	0.034	0.018	0.124	0.099	0.037	0.184	0.178	0.101	0.206	0.154	0.008	0.052	0.146	0.095	0.182	0.144	0.127	0.006	0.014	0.005	0.003	0.003	0.01	0.018	0	0
250	570	230	0.063	0.012	0.028	0.078	0.191	0.047	0.06	0.024	0.012	0.078	0.072	0.117	0.135	0.194	0.149	0.093	0.129	0.15	0.031	0.1	0.001	0.02	0.013	0.086	0.078	0.04	0.144	0.143	0.09	0.171	0.118	0.004	0.04	0.111	0.072	0.176	0.143	0.113	0.004	0.007	0.017	0.002	0.001	0.018	0.012	0	0
70	570	250	0.427	0.066	0.024	0.306	0.449	0.168	0.602	0.318	0.09	0.151	0.132	0.81	0.158	0.077	0.038	0.239	0.504	0.144	0.21	0.238	0.072	0.021	1	0.032	0.075	0.046	0.564	0.824	0.365	0.482	0.566	0.024	0.853	0.491	0.207	0.433	0.454	0.123	0.559	0.013	0.014	0.004	0.073	0.021	0.01	0.099	0
90	570	250	0.356	0.048	0.023	0.271	0.409	0.279	0.44	0.209	0.083	0.122	0.09	0.69	0.141	0.094	0.1	0.226	0.451	0.137	0.157	0.236	0.057	0.013	0.422	0.059	0.064	0.055	0.549	0.605	0.336	0.447	0.518	0.039	0.721	0.461	0.201	0.398	0.424	0.128	0.502	0.021	0.015	0.013	0.076	0.077	0.015	0.066	0
110	570	250	0.239	0.037	0.024	0.334	0.39	0.101	0.162	0.08	0.032	0.083	0.301	0.489	0.103	0.215	0.572	0.184	0.301	0.238	0.105	0.227	0.027	0.002	0.131	0.365	0.296	0.134	0.477	0.443	0.281	0.419	0.441	0.19	0.255	0.404	0.18	0.341	0.373	0.151	0.155	0.032	0.041	0.001	0.013	0.065	0.067	0.002	0.055
130	570	250	0.177	0.023	0.021	0.246	0.321	0.086	0.087	0.053	0.02	0.119	0.668	0.373	0.147	0.192	0.701	0.157	0.224	0.169	0.088	0.203	0.003	0.001	0.043	0.277	0.267	0.089	0.436	0.395	0.237	0.38	0.364	0.123	0.12	0.381	0.163	0.334	0.312	0.17	0.048	0.033	0.012	0.002	0.007	0.034	0.073	0	0.009
150	570	250	0.153	0.02	0.019	0.249	0.333	0.144	0.058	0.06	0.02	0.135	0.63	0.31	0.145	0.097	0.639	0.142	0.214	0.17	0.09	0.175	0.001	0.001	0.038	0.19	0.231	0.059	0.354	0.318	0.185	0.335	0.292	0.076	0.058	0.306	0.143	0.314	0.242	0.142	0.02	0.032	0.007	0.008	0.018	0.045	0.065	0	0.006
170	570	250	0.144	0.021	0.018	0.187	0.307	0.082	0.057	0.046	0.016	0.121	0.41	0.264	0.153	0.097	0.54	0.122	0.179	0.132	0.071	0.146	0.001	0.002	0.036	0.207	0.183	0.061	0.284	0.329	0.163	0.278	0.242	0.055	0.048	0.247	0.122	0.268	0.192	0.132	0.011	0.028	0.008	0.006	0.012	0.037	0.062	0.001	0.001
190	570	250	0.119	0.016	0.019	0.168	0.279	0.053	0.074	0.032	0.013	0.133	0.277	0.244	0.147	0.116	0.45	0.105	0.158	0.104	0.045	0.128	0.001	0.006	0.027	0.198	0.151	0.047	0.227	0.283	0.13	0.242	0.209	0.026	0.059	0.224	0.113	0.227	0.153	0.139	0.01	0.022	0.008	0.007	0.005	0.051	0.051	0.001	0
210	570	250	0.093	0.014	0.02	0.169	0.306	0.041	0.13	0.025	0.012	0.17	0.21	0.233	0.147	0.139	0.316	0.093	0.163	0.12	0.041	0.128	0.001	0.013	0.019	0.17	0.149	0.045	0.212	0.22	0.109	0.226	0.198	0.013	0.044	0.167	0.141	0.195	0.134	0.134	0.007	0.018	0.01	0.019	0.003	0.062	0.033	0.001	0
230	570	250	0.074	0.013	0.024	0.13	0.278	0.034	0.207	0.023	0.012	0.124	0.127	0.201	0.138	0.162	0.247	0.086	0.147	0.127	0.038	0.11	0.001	0.013	0.018	0.138	0.147	0.033	0.193	0.187	0.096	0.216	0.168	0.01	0.038	0.142	0.114	0.182	0.13	0.123	0.005	0.012	0.01	0.005	0.003	0.036	0.024	0	0
250	570	250	0.062	0.012	0.046	0.091	0.236	0.033	0.136	0.029	0.015	0.093	0.073	0.164	0.148	0.24	0.173	0.082	0.141	0.144	0.035	0.104	0.002	0.008	0.014	0.087	0.129	0.028	0.175	0.163	0.082	0.189	0.133	0.007	0.035	0.125	0.077	0.171	0.152	0.122	0.003	0.011	0.029	0.002	0.001	0.035	0.019	0	0
270	570	250	0.048	0.013	0.058	0.07	0.189	0.034	0.06	0.042	0.022	0.078	0.046	0.109	0.139	0.207	0.112	0.089	0.133	0.162	0.029	0.094	0.002	0.004	0.012	0.047	0.082	0.024	0.142	0.139	0.077	0.167	0.11	0.002	0.033	0.107	0.065	0.157	0.166	0.118	0.002	0.008	0.034	0.002	0.002	0.025	0.03	0	0
70	570	270	0.391	0.068	0.021	0.282	0.35	0.154	0.401	0.274	0.061	0.134	0.107	0.718	0.166	0.089	0.039	0.21	0.488	0.138	0.213	0.201	0.09	0.018	0.756	0.009	0.092	0.049	0.527	0.725	0.316	0.425	0.494	0.029	0.814	0.485	0.193	0.345	0.382	0.116	0.433	0.018	0.03	0.015	0.075	0.021	0.067	0.135	0
90	570	270	0.295	0.041	0.017	0.278	0.323	0.147	0.288	0.231	0.04	0.068	0.082	0.533	0.118	0.065	0.116	0.162	0.402	0.119	0.424	0.168	0.052	0.004	0.263	0.026	0.258	0.047	0.394	0.409	0.216	0.303	0.337	0.043	0.598	0.327	0.151	0.249	0.262	0.09	0.305	0.02	0.028	0.002	0.053	0.036	0.018	0.038	0.006
110	570	270	0.197	0.029	0.017	0.215	0.31	0.044	0.132	0.116	0.021	0.069	0.147	0.437	0.087	0.054	0.561	0.146	0.289	0.134	0.118	0.168	0.011	0.001	0.062	0.181	0.332	0.114	0.364	0.323	0.19	0.307	0.316	0.105	0.124	0.302	0.135	0.225	0.254	0.118	0.092	0.03	0.04	0.002	0.016	0.024	0.074	0.004	0.02
130	570	270	0.15	0.019	0.018	0.15	0.278	0.052	0.204	0.055	0.015	0.081	0.167	0.297	0.099	0.058	0.587	0.115	0.166	0.121	0.072	0.147	0.001	0.001	0.036	0.217	0.238	0.05	0.325	0.287	0.159	0.265	0.255	0.084	0.044	0.273	0.119	0.212	0.227	0.107	0.021	0.022	0.007	0.001	0.005	0.028	0.067	0.001	0.004
150	570	270	0.117	0.013	0.014	0.15	0.234	0.06	0.155	0.037	0.011	0.108	0.238	0.267	0.108	0.064	0.543	0.108	0.151	0.1	0.077	0.141	0.001	0.001	0.027	0.24	0.205	0.043	0.263	0.248	0.134	0.246	0.216	0.059	0.036	0.235	0.108	0.215	0.191	0.105	0.005	0.023	0.006	0.002	0.007	0.014	0.062	0.001	0.001
170	570	270	0.109	0.013	0.014	0.111	0.232	0.04	0.162	0.025	0.017	0.108	0.171	0.237	0.112	0.071	0.437	0.105	0.136	0.088	0.062	0.129	0.001	0.002	0.023	0.175	0.172	0.04	0.233	0.274	0.123	0.234	0.178	0.055	0.033	0.21	0.1	0.21	0.16	0.106	0.002	0.019	0.004	0.003	0.012	0.01	0.066	0.001	0.001
190	570	270	0.077	0.012	0.014	0.141	0.234	0.047	0.194	0.018	0.009	0.106	0.119	0.238	0.119	0.087	0.392	0.097	0.132	0.097	0.041	0.117	0.001	0.002	0.019	0.185	0.152	0.037	0.213	0.255	0.113	0.219	0.175	0.034	0.036	0.215	0.096	0.21	0.139	0.114	0.005	0.015	0.006	0.004	0.004	0.029	0.053	0	0
210	570	270	0.068	0.01	0.015	0.147	0.258	0.035	0.215	0.018	0.009	0.124	0.098	0.199	0.116	0.093	0.301	0.09	0.117	0.112	0.037	0.107	0.001	0.005	0.015	0.153	0.15	0.031	0.191	0.186	0.097	0.201	0.17	0.02	0.032	0.154	0.099	0.181	0.119	0.116	0.003	0.012	0.005	0.008	0.003	0.038	0.046	0.004	0
230	570	270	0.058	0.01	0.015	0.105	0.251	0.03	0.224	0.014	0.008	0.113	0.064	0.173	0.109	0.099	0.236	0.082	0.107	0.13	0.036	0.099	0.001	0.004	0.013	0.131	0.168	0.027	0.187	0.169	0.086	0.192	0.153	0.012	0.03	0.136	0.087	0.172	0.111	0.114	0.002	0.011	0.002	0.002	0.003	0.011	0.026	0	0
250	570	270	0.05	0.01	0.017	0.104	0.211	0.034	0.21	0.014	0.008	0.1	0.055	0.148	0.107	0.13	0.175	0.077	0.104	0.144	0.033	0.09	0.001	0.003	0.013	0.099	0.158	0.025	0.171	0.157	0.072	0.179	0.13	0.007	0.032	0.121	0.075	0.162	0.112	0.111	0.001	0.012	0.005	0.002	0.002	0.007	0.022	0	0
270	570	270	0.043	0.012	0.029	0.101	0.201	0.043	0.177	0.016	0.009	0.096	0.048	0.127	0.111	0.164	0.107	0.079	0.115	0.156	0.031	0.084	0.001	0.004	0.012	0.085	0.134	0.021	0.153	0.143	0.063	0.173	0.113	0.002	0.038	0.107	0.067	0.157	0.111	0.107	0.002	0.011	0.012	0.005	0.003	0.013	0.023	0	0
70	570	290	0.297	0.059	0.013	0.157	0.335	0.049	0.241	0.218	0.04	0.082	0.087	0.42	0.185	0.124	0.051	0.129	0.303	0.181	0.183	0.128	0.166	0.007	0.334	0.007	0.135	0.055	0.323	0.5	0.13	0.29	0.247	0.023	0.494	0.191	0.123	0.162	0.171	0.062	0.243	0.031	0.014	0.008	0.139	0.011	0.055	0.029	0
90	570	290	0.189	0.028	0.012	0.174	0.27	0.026	0.172	0.176	0.025	0.042	0.052	0.373	0.101	0.055	0.107	0.11	0.28	0.106	0.388	0.099	0.071	0.005	0.107	0.015	0.263	0.036	0.22	0.25	0.105	0.2	0.163	0.031	0.394	0.146	0.081	0.102	0.117	0.049	0.164	0.02	0.022	0.002	0.014	0.007	0.018	0.063	0
110	570	290	0.14	0.02	0.01	0.121	0.302	0.022	0.2	0.082	0.017	0.054	0.031	0.358	0.072	0.044	0.559	0.097	0.229	0.115	0.112	0.111	0.009	0.001	0.025	0.267	0.268	0.09	0.226	0.188	0.109	0.215	0.174	0.049	0.084	0.166	0.077	0.113	0.133	0.06	0.047	0.022	0.025	0.001	0.007	0.004	0.045	0.004	0
130	570	290	0.113	0.016	0.01	0.094	0.286	0.031	0.241	0.035	0.016	0.089	0.038	0.258	0.092	0.051	0.488	0.083	0.142	0.11	0.056	0.106	0.001	0.002	0.015	0.253	0.185	0.038	0.222	0.181	0.1	0.19	0.164	0.04	0.032	0.167	0.076	0.122	0.136	0.069	0.004	0.018	0.006	0.001	0.003	0.004	0.049	0.007	0.001
150	570	290	0.089	0.011	0.01	0.093	0.238	0.042	0.187	0.024	0.01	0.108	0.043	0.224	0.091	0.06	0.467	0.086	0.113	0.11	0.067	0.109	0.001	0.002	0.015	0.248	0.147	0.035	0.213	0.179	0.093	0.185	0.156	0.029	0.028	0.171	0.079	0.141	0.14	0.084	0.001	0.017	0.003	0.001	0.004	0.001	0.055	0.01	0
170	570	290	0.08	0.011	0.011	0.09	0.245	0.033	0.177	0.021	0.009	0.13	0.046	0.178	0.093	0.07	0.388	0.091	0.095	0.115	0.056	0.11	0.001	0.001	0.012	0.216	0.156	0.034	0.199	0.232	0.089	0.184	0.151	0.023	0.028	0.171	0.081	0.164	0.125	0.101	0.001	0.019	0.001	0.005	0.013	0.001	0.062	0.002	0.002
190	570	290	0.084	0.011	0.012	0.104	0.251	0.033	0.193	0.018	0.011	0.126	0.074	0.174	0.111	0.091	0.328	0.09	0.103	0.096	0.037	0.107	0.001	0.001	0.014	0.227	0.166	0.034	0.189	0.225	0.088	0.189	0.146	0.017	0.034	0.195	0.083	0.171	0.115	0.11	0.001	0.014	0.002	0.006	0.006	0.011	0.047	0.001	0
210	570	290	0.068	0.011	0.012	0.111	0.27	0.036	0.247	0.016	0.01	0.123	0.083	0.168	0.115	0.1	0.26	0.083	0.098	0.129	0.034	0.098	0.001	0.002	0.013	0.161	0.143	0.029	0.178	0.162	0.081	0.187	0.143	0.014	0.034	0.133	0.082	0.159	0.102	0.107	0.001	0.014	0.002	0.003	0.003	0.01	0.038	0	0
230	570	290	0.054	0.01	0.012	0.099	0.233	0.019	0.282	0.011	0.008	0.107	0.06	0.15	0.099	0.105	0.162	0.076	0.081	0.148	0.033	0.088	0.001	0.003	0.012	0.102	0.153	0.026	0.163	0.147	0.073	0.173	0.127	0.011	0.032	0.116	0.074	0.148	0.096	0.105	0.001	0.011	0.001	0.002	0.002	0.003	0.03	0	0
250	570	290	0.047	0.009	0.013	0.113	0.214	0.029	0.24	0.011	0.008	0.109	0.053	0.141	0.1	0.122	0.113	0.074	0.091	0.154	0.033	0.082	0.001	0.003	0.012	0.099	0.147	0.022	0.16	0.142	0.066	0.168	0.118	0.007	0.038	0.107	0.07	0.147	0.094	0.107	0.001	0.012	0.003	0.003	0.002	0.004	0.025	0	0
270	570	290	0.041	0.011	0.024	0.108	0.213	0.037	0.207	0.014	0.008	0.093	0.044	0.123	0.108	0.135	0.077	0.071	0.1	0.154	0.03	0.082	0.001	0.003	0.01	0.079	0.126	0.021	0.15	0.139	0.06	0.172	0.109	0.002	0.038	0.101	0.063	0.148	0.092	0.107	0.003	0.01	0.009	0.005	0.003	0.005	0.021	0	0
290	570	290	0.035	0.012	0.024	0.062	0.191	0.034	0.071	0.022	0.009	0.066	0.037	0.071	0.1	0.119	0.045	0.067	0.09	0.175	0.023	0.068	0.001	0.002	0.008	0.049	0.068	0.02	0.126	0.106	0.05	0.143	0.089	0.001	0.034	0.08	0.053	0.116	0.08	0.094	0.004	0.009	0.009	0.014	0.015	0.003	0.014	0	0
130	590	170	0.207	0.041	0.036	0.915	0.802	0.17	0.54	0.117	0.036	0.231	0.208	0.741	0.316	0.168	0.47	0.234	0.43	0.143	0.576	0.282	0.048	0.052	0.078	1	0.421	0.087	0.62	0.444	0.445	0.565	0.683	0.099	0.654	0.505	0.242	0.479	0.478	0.25	0.393	0.028	0.104	0.006	0.004	0.031	0.024	0	0.273
110	590	190	0.234	0.036	0.048	0.703	0.819	0.114	0.164	0.089	0.054	0.138	0.089	0.6	0.194	0.112	0.482	0.245	0.365	0.271	0.153	0.28	0.025	0.016	0.089	0.898	0.288	0.06	0.611	0.562	0.478	0.638	0.687	0.11	0.326	0.469	0.232	0.496	0.513	0.236	0.169	0.027	0.099	0.002	0.01	0.172	0.043	0	0.188
130	590	190	0.184	0.036	0.049	0.714	0.79	0.162	0.16	0.086	0.035	0.26	0.221	0.606	0.306	0.203	0.88	0.242	0.356	0.276	0.182	0.277	0.014	0.047	0.052	0.838	0.236	0.064	0.639	0.533	0.458	0.733	0.666	0.081	0.269	0.523	0.255	0.536	0.511	0.24	0.138	0.029	0.066	0.014	0.007	0.149	0.038	0	0.043
150	590	190	0.209	0.045	0.031	0.405	0.617	0.172	0.104	0.074	0.036	0.303	0.315	0.522	0.294	0.24	0.777	0.202	0.257	0.296	0.122	0.212	0.006	0.035	0.064	0.598	0.258	0.09	0.5	0.431	0.323	0.49	0.498	0.052	0.265	0.398	0.218	0.413	0.355	0.204	0.098	0.036	0.039	0.015	0.014	0.065	0.037	0	0.01
90	590	210	0.291	0.04	0.024	0.311	0.447	0.081	0.305	0.165	0.042	0.071	0.049	0.628	0.181	0.059	0.248	0.198	0.341	0.434	0.375	0.227	0.045	0.002	0.196	0.722	0.426	0.054	0.523	0.578	0.353	0.459	0.526	0.03	0.677	0.368	0.19	0.406	0.382	0.158	0.514	0.022	0.021	0.002	0.004	0.091	0.038	0.107	0.014
110	590	210	0.211	0.037	0.053	0.618	0.584	0.096	0.126	0.1	0.04	0.163	0.092	0.623	0.194	0.137	0.916	0.241	0.356	0.261	0.122	0.273	0.016	0.011	0.058	0.858	0.282	0.057	0.595	0.566	0.453	0.695	0.703	0.126	0.295	0.49	0.245	0.516	0.497	0.236	0.149	0.023	0.048	0.001	0.009	0.313	0.048	0.001	0.081
130	590	210	0.188	0.029	0.07	0.495	0.551	0.08	0.076	0.07	0.033	0.248	0.182	0.528	0.264	0.195	1	0.216	0.305	0.214	0.112	0.261	0.006	0.017	0.055	0.684	0.195	0.066	0.584	0.539	0.386	0.719	0.601	0.083	0.201	0.498	0.238	0.513	0.464	0.211	0.093	0.022	0.035	0.002	0.007	0.239	0.046	0	0.013
150	590	210	0.19	0.038	0.031	0.331	0.528	0.104	0.102	0.06	0.034	0.236	0.269	0.43	0.246	0.199	0.768	0.183	0.218	0.205	0.096	0.201	0.004	0.011	0.072	0.513	0.239	0.087	0.437	0.426	0.269	0.433	0.461	0.053	0.193	0.359	0.193	0.369	0.328	0.18	0.071	0.031	0.015	0.005	0.014	0.072	0.05	0	0.029
170	590	210	0.18	0.033	0.019	0.329	0.476	0.155	0.048	0.044	0.024	0.199	0.299	0.293	0.201	0.173	0.514	0.151	0.173	0.13	0.088	0.165	0.002	0.01	0.046	0.378	0.227	0.084	0.318	0.355	0.201	0.307	0.322	0.038	0.098	0.268	0.157	0.287	0.237	0.168	0.041	0.028	0.014	0.003	0.009	0.041	0.049	0	0.035
190	590	210	0.123	0.026	0.014	0.255	0.409	0.095	0.086	0.031	0.019	0.145	0.224	0.214	0.158	0.119	0.216	0.119	0.121	0.097	0.056	0.141	0.001	0.018	0.028	0.179	0.175	0.051	0.234	0.346	0.155	0.236	0.228	0.014	0.063	0.223	0.119	0.213	0.196	0.155	0.026	0.015	0.007	0.003	0.005	0.012	0.022	0	0.001
90	590	230	0.281	0.053	0.027	0.351	0.557	0.096	0.512	0.215	0.107	0.09	0.08	0.78	0.234	0.064	0.411	0.232	0.423	0.734	0.38	0.258	0.086	0.003	0.342	0.77	0.382	0.116	0.613	0.657	0.395	0.529	0.615	0.058	1	0.482	0.243	0.477	0.441	0.198	0.597	0.03	0.019	0.002	0.009	0.112	0.033	0.13	0.009
110	590	230	0.223	0.033	0.053	0.348	0.531	0.063	0.078	0.071	0.05	0.178	0.106	0.548	0.173	0.126	0.882	0.195	0.239	0.367	0.103	0.25	0.014	0.014	0.092	0.602	0.227	0.058	0.525	0.512	0.338	0.614	0.598	0.165	0.219	0.463	0.22	0.441	0.392	0.195	0.093	0.025	0.03	0.001	0.023	0.31	0.074	0	0.078
130	590	230	0.196	0.025	0.032	0.33	0.532	0.055	0.179	0.042	0.028	0.226	0.203	0.439	0.205	0.145	0.604	0.157	0.155	0.248	0.085	0.217	0.005	0.011	0.089	0.369	0.211	0.067	0.448	0.427	0.272	0.441	0.472	0.122	0.176	0.405	0.194	0.38	0.329	0.158	0.073	0.029	0.02	0.002	0.009	0.158	0.084	0	0.117
150	590	230	0.173	0.029	0.02	0.362	0.689	0.082	0.133	0.037	0.024	0.203	0.294	0.334	0.19	0.162	0.422	0.147	0.174	0.185	0.083	0.185	0.008	0.011	0.07	0.361	0.246	0.1	0.381	0.404	0.228	0.365	0.464	0.074	0.15	0.34	0.2	0.328	0.282	0.148	0.063	0.027	0.01	0.003	0.053	0.066	0.065	0.002	0.232
170	590	230	0.174	0.025	0.021	0.438	0.633	0.107	0.068	0.037	0.022	0.197	0.385	0.333	0.174	0.126	0.314	0.135	0.183	0.1	0.08	0.161	0.002	0.011	0.037	0.294	0.279	0.08	0.318	0.376	0.185	0.311	0.363	0.047	0.092	0.268	0.17	0.285	0.231	0.145	0.049	0.025	0.013	0.004	0.011	0.045	0.053	0.001	0.149
190	590	230	0.129	0.021	0.02	0.285	0.533	0.069	0.068	0.035	0.014	0.169	0.35	0.246	0.179	0.146	0.167	0.117	0.172	0.095	0.051	0.152	0.002	0.017	0.026	0.176	0.205	0.052	0.259	0.363	0.148	0.265	0.273	0.021	0.069	0.238	0.136	0.234	0.196	0.163	0.022	0.02	0.006	0.005	0.007	0.026	0.036	0	0.003
210	590	230	0.107	0.017	0.021	0.151	0.342	0.047	0.143	0.035	0.013	0.155	0.281	0.22	0.171	0.165	0.143	0.1	0.166	0.123	0.041	0.122	0.001	0.055	0.02	0.136	0.139	0.046	0.217	0.236	0.122	0.229	0.2	0.01	0.07	0.195	0.123	0.213	0.17	0.143	0.012	0.013	0.004	0.009	0.004	0.01	0.022	0	0
230	590	230	0.09	0.013	0.015	0.103	0.211	0.041	0.099	0.022	0.01	0.095	0.126	0.147	0.127	0.117	0.099	0.094	0.125	0.132	0.032	0.11	0.001	0.047	0.016	0.126	0.097	0.036	0.162	0.166	0.103	0.185	0.139	0.007	0.056	0.126	0.084	0.172	0.151	0.119	0.005	0.009	0.002	0.007	0.002	0.003	0.012	0	0
90	590	250	0.3	0.05	0.022	0.269	0.585	0.089	0.591	0.207	0.071	0.088	0.102	0.763	0.182	0.064	0.412	0.201	0.419	0.739	0.251	0.243	0.077	0.003	0.256	0.538	0.271	0.221	0.554	0.641	0.324	0.49	0.524	0.073	0.876	0.473	0.212	0.393	0.415	0.155	0.64	0.033	0.023	0.002	0.01	0.079	0.052	0.009	0.125
110	590	250	0.214	0.032	0.025	0.295	0.63	0.072	0.045	0.048	0.033	0.14	0.279	0.466	0.132	0.175	0.543	0.145	0.201	0.312	0.086	0.216	0.008	0.005	0.051	0.474	0.287	0.078	0.441	0.458	0.25	0.397	0.438	0.176	0.268	0.364	0.191	0.324	0.329	0.143	0.123	0.034	0.009	0.002	0.007	0.17	0.095	0	0.329
130	590	250	0.182	0.025	0.017	0.353	0.699	0.076	0.051	0.032	0.024	0.169	0.52	0.384	0.141	0.141	0.325	0.135	0.18	0.256	0.073	0.19	0.004	0.004	0.036	0.342	0.302	0.063	0.368	0.372	0.214	0.35	0.392	0.114	0.17	0.328	0.172	0.297	0.272	0.125	0.089	0.03	0.005	0.002	0.009	0.059	0.114	0.004	0.362
150	590	250	0.153	0.018	0.025	0.321	0.629	0.129	0.047	0.041	0.017	0.157	0.464	0.311	0.138	0.089	0.137	0.129	0.18	0.126	0.078	0.166	0.002	0.006	0.032	0.187	0.266	0.055	0.312	0.304	0.188	0.316	0.316	0.08	0.061	0.284	0.156	0.278	0.229	0.124	0.042	0.024	0.003	0.003	0.021	0.077	0.077	0.007	0.075
170	590	250	0.143	0.021	0.024	0.303	0.493	0.118	0.053	0.035	0.017	0.153	0.363	0.277	0.142	0.105	0.128	0.123	0.17	0.092	0.073	0.144	0.001	0.005	0.024	0.199	0.243	0.052	0.272	0.331	0.163	0.285	0.298	0.045	0.066	0.234	0.148	0.247	0.199	0.122	0.016	0.023	0.009	0.012	0.242	0.075	0.063	0.005	0.013
190	590	250	0.133	0.016	0.021	0.236	0.526	0.059	0.076	0.029	0.014	0.18	0.26	0.251	0.143	0.126	0.174	0.113	0.175	0.104	0.046	0.131	0.001	0.014	0.022	0.178	0.199	0.047	0.245	0.37	0.133	0.259	0.288	0.025	0.055	0.218	0.17	0.219	0.173	0.132	0.009	0.021	0.011	0.023	0.137	0.08	0.043	0	0
210	590	250	0.105	0.016	0.023	0.168	0.316	0.047	0.118	0.026	0.013	0.164	0.201	0.229	0.138	0.138	0.143	0.101	0.179	0.114	0.041	0.118	0.001	0.023	0.018	0.146	0.172	0.037	0.227	0.236	0.115	0.24	0.2	0.016	0.048	0.181	0.148	0.208	0.147	0.133	0.007	0.016	0.008	0.017	0.003	0.055	0.031	0	0
230	590	250	0.086	0.014	0.025	0.121	0.253	0.04	0.142	0.025	0.013	0.128	0.138	0.188	0.133	0.175	0.113	0.09	0.152	0.138	0.039	0.108	0.001	0.02	0.016	0.117	0.162	0.033	0.208	0.196	0.098	0.217	0.166	0.011	0.047	0.145	0.105	0.193	0.147	0.131	0.004	0.012	0.011	0.005	0.003	0.03	0.025	0	0
250	590	250	0.067	0.013	0.063	0.093	0.207	0.037	0.073	0.036	0.021	0.099	0.076	0.149	0.158	0.276	0.08	0.095	0.161	0.153	0.035	0.113	0.002	0.011	0.015	0.073	0.116	0.028	0.178	0.17	0.089	0.196	0.138	0.006	0.04	0.123	0.086	0.176	0.193	0.13	0.004	0.01	0.042	0.003	0.003	0.042	0.018	0	0
90	590	270	0.287	0.046	0.015	0.305	0.601	0.05	0.287	0.196	0.038	0.073	0.128	0.585	0.102	0.058	0.208	0.15	0.372	0.714	0.152	0.179	0.059	0.003	0.138	0.244	0.246	0.123	0.421	0.495	0.213	0.329	0.382	0.089	0.646	0.302	0.174	0.242	0.283	0.111	0.436	0.034	0.012	0.003	0.011	0.037	0.075	0.079	0.231
110	590	270	0.207	0.031	0.014	0.234	0.785	0.037	0.039	0.058	0.025	0.101	0.228	0.405	0.08	0.087	0.181	0.104	0.196	0.2	0.069	0.162	0.006	0.002	0.054	0.28	0.35	0.074	0.322	0.326	0.17	0.275	0.336	0.147	0.086	0.256	0.156	0.203	0.248	0.106	0.083	0.031	0.004	0.002	0.008	0.033	0.127	0	0.241
130	590	270	0.154	0.019	0.015	0.155	0.487	0.071	0.051	0.038	0.022	0.133	0.254	0.311	0.093	0.074	0.101	0.102	0.152	0.109	0.065	0.148	0.001	0.002	0.026	0.186	0.267	0.046	0.274	0.227	0.15	0.246	0.236	0.087	0.043	0.246	0.118	0.2	0.204	0.096	0.027	0.023	0.001	0.002	0.005	0.022	0.081	0.014	0.033
150	590	270	0.118	0.014	0.014	0.142	0.311	0.077	0.053	0.027	0.011	0.15	0.252	0.269	0.1	0.069	0.052	0.105	0.141	0.099	0.067	0.137	0.001	0.002	0.03	0.17	0.227	0.045	0.241	0.216	0.137	0.239	0.197	0.081	0.034	0.226	0.108	0.195	0.176	0.099	0.008	0.02	0	0.002	0.007	0.024	0.092	0.008	0.002
170	590	270	0.112	0.014	0.013	0.153	0.34	0.05	0.075	0.021	0.018	0.168	0.159	0.234	0.109	0.08	0.08	0.1	0.118	0.105	0.065	0.124	0.001	0.004	0.025	0.164	0.207	0.04	0.231	0.296	0.124	0.229	0.256	0.044	0.04	0.197	0.142	0.185	0.173	0.112	0.003	0.018	0.005	0.005	0.95	0.027	0.107	0.004	0.001
190	590	270	0.092	0.012	0.014	0.178	0.6	0.035	0.09	0.017	0.016	0.187	0.144	0.214	0.114	0.094	0.108	0.094	0.105	0.123	0.038	0.114	0.001	0.006	0.015	0.138	0.183	0.036	0.219	0.377	0.108	0.207	0.373	0.022	0.041	0.191	0.228	0.173	0.174	0.111	0.003	0.017	0.008	0.027	1	0.052	0.069	0	0
210	590	270	0.075	0.012	0.015	0.121	0.333	0.028	0.126	0.015	0.019	0.188	0.102	0.199	0.112	0.093	0.12	0.091	0.116	0.139	0.037	0.114	0.001	0.009	0.014	0.135	0.184	0.036	0.223	0.215	0.1	0.211	0.204	0.022	0.035	0.164	0.153	0.182	0.131	0.122	0.002	0.018	0.004	0.035	0.013	0.036	0.052	0	0
230	590	270	0.063	0.011	0.016	0.102	0.227	0.022	0.176	0.013	0.011	0.138	0.075	0.166	0.106	0.116	0.09	0.087	0.092	0.15	0.036	0.103	0.001	0.006	0.014	0.104	0.191	0.029	0.213	0.181	0.088	0.201	0.159	0.014	0.036	0.134	0.1	0.176	0.123	0.119	0.001	0.013	0.004	0.008	0.005	0.011	0.029	0	0
250	590	270	0.054	0.011	0.026	0.099	0.202	0.028	0.19	0.015	0.013	0.114	0.062	0.148	0.11	0.155	0.092	0.084	0.107	0.16	0.034	0.096	0.001	0.004	0.012	0.086	0.16	0.024	0.192	0.164	0.077	0.186	0.141	0.007	0.039	0.119	0.084	0.163	0.13	0.115	0.002	0.014	0.012	0.009	0.003	0.015	0.021	0	0
270	590	270	0.046	0.013	0.041	0.078	0.191	0.038	0.129	0.021	0.015	0.094	0.047	0.113	0.111	0.171	0.087	0.107	0.117	0.163	0.031	0.086	0.002	0.004	0.011	0.071	0.124	0.023	0.172	0.146	0.069	0.177	0.117	0.003	0.042	0.106	0.071	0.159	0.128	0.111	0.002	0.011	0.02	0.011	0.004	0.017	0.015	0	0
90	590	290	0.215	0.034	0.008	0.15	0.462	0.014	0.068	0.134	0.026	0.056	0.047	0.34	0.073	0.064	0.087	0.088	0.23	0.138	0.09	0.102	0.028	0.008	0.067	0.093	0.235	0.112	0.211	0.297	0.118	0.187	0.163	0.073	0.217	0.139	0.079	0.1	0.123	0.055	0.144	0.033	0.014	0.002	0.01	0.011	0.073	0.082	0.014
110	590	290	0.153	0.024	0.008	0.106	0.424	0.021	0.058	0.047	0.022	0.127	0.034	0.34	0.067	0.046	0.096	0.078	0.167	0.097	0.047	0.112	0.001	0.002	0.027	0.225	0.295	0.071	0.221	0.161	0.119	0.178	0.167	0.077	0.033	0.158	0.076	0.105	0.14	0.068	0.013	0.021	0.007	0.001	0.005	0.005	0.09	0	0.001
[truncated: 412 more rows]
[truncated: 218 more columns]
