# Supplementary material for: Brain-wide cellular resolution imaging of Cre transgenic zebrafish lines for functional circuit-mapping
Source: eLife. 2019 Feb 8;8:e42687. doi: 10.7554/eLife.42687 (PMC6392497; doi:10.7554/eLife.42687)
Supplement: Supplementary file 4. — Mean expression levels of transgenic markers in neuroanatomical regions defined by Z-Brain. Cell type markers: Glutamatergic (vglut2a:DsRed), GABAergic (gad1b:GFP), Glycinergic (glyt2:GFP), Catecholaminergic (vmat2:GFP), Serotonergic, (pet1:GFP), Cholinergic (chata:Gal4), Dopaminergic (th:Gal4), Hypocretin (hcrt:RFP), and glia (gfap:GFP). [file elife-42687-supp4.xlsx]

## Sheet: ZBrain Expression
Structure	Size (µm³)	Glutamatergic	GABAergic	Glycinergic	Catecholaminergic	Serotonergic	Cholinergic	Dopaminergic	Hypocretin	glial
Telencephalon
Olfactory bulb	367008	0.19	0.03	0.01	0.03	0.06	0	0	0.06	0.18
Pallium	1179496	0.13	0	0	0.01	0.03	0	0	0.06	0.08
Subpallium	770288	0.04	0.1	0	0.04	0.05	0	0	0.04	0.1
Telencephalic migrated area M4	27104	0.02	0.03	0	0.02	0.02	0	0	0.04	0.08
Diencephalon
Pineal complex	27240	0.08	0	0.08	0.01	0.02	0.01	0.01	0.08	0.03
Habenula	263040	0.41	0	0.01	0	0.05	0	0	0.05	0.03
Thalamic eminence	25872	0.07	0	0	0	0.02	0	0	0.03	0.08
Thalamus	209496	0.09	0.01	0	0.02	0.03	0	0	0.04	0.04
Pretectum	264960	0.03	0.08	0	0.05	0.03	0	0	0.04	0.05
Migrated pretectal area M1	35904	0.07	0.02	0	0.01	0.06	0.01	0	0.05	0.05
Ventral thalamus	198392	0.05	0.05	0	0	0.03	0	0	0.04	0.06
Posterior tuberculum	411736	0.07	0.02	0	0.03	0.06	0	0.02	0.04	0.06
Migrated posterior tubercular area M2	99744	0.12	0.05	0	0.01	0.07	0.01	0	0.03	0.07
Preoptic area	695632	0.03	0.04	0	0.01	0.02	0	0	0.03	0.06
Hypothalamus - rostral zone	495408	0.04	0.02	0	0.01	0.02	0	0.01	0.06	0.03
Hypothalamus - intermediate zone	1723144	0.09	0.04	0	0.03	0.03	0	0	0.03	0.04
Hypothalamus - diffuse nucleus	247744	0.15	0.04	0	0	0.03	0	0	0.03	0.05
Hypothalamus - caudal zone	314888	0.03	0.02	0	0.19	0.01	0	0.02	0.02	0.01
Pituitary	195488	0.06	0.01	0	0.01	0.01	0	0	0.01	0.01
Midbrain
Optic tectum - stratum periventriculare	3314752	0.11	0.1	0	0	0.03	0.02	0	0.04	0.01
Optic tectum - neuropil	2264680	0.06	0.14	0.01	0.01	0.04	0.03	0	0.1	0.01
Medial tectal band	362336	0.02	0.18	0	0	0.01	0.02	0	0.04	0.01
Griseum tectale	42872	0.23	0.02	0.01	0	0.07	0.01	0	0.07	0.01
Superior raphe	84640	0.02	0.05	0	0.26	0.18	0.03	0	0.03	0.03
Tegmentum	1056824	0.05	0.09	0.01	0.01	0.09	0.01	0	0.04	0.05
Oculomotor nerve nucleus	79760	0.03	0.03	0.01	0.01	0.12	0.11	0	0.05	0.03
Nucmlf	27920	0.03	0.03	0.04	0.02	0.27	0.02	0	0.06	0.02
Interpeduncular necleus tegmentum	113704	0.05	0.09	0	0.03	0.05	0.01	0	0.03	0.07
Torus lateralis	5264	0.15	0.01	0	0	0.02	0.01	0	0.02	0.02
Torus semicircularis	1280280	0.14	0.09	0	0.01	0.1	0.01	0	0.04	0.08
Torus longitudinalis	63280	0.13	0.03	0	0	0.01	0	0	0.05	0
Hindbrain
Corpus cerebelli	1065048	0.1	0.16	0.01	0.01	0.06	0.01	0	0.05	0.05
Valvula cerebelli	233096	0.05	0.06	0	0	0.01	0.01	0	0.05	0.02
Cerebellar neuropil	32608	0.14	0.03	0.02	0.03	0.16	0.02	0	0.05	0.04
Cerebellum caudal lobe	40912	0.1	0.02	0	0	0.03	0.01	0	0.05	0.08
Eminentia granularis	214112	0.06	0.07	0.01	0.01	0.1	0.01	0	0.04	0.09
Locus coeruleus	38216	0.09	0.02	0.02	0.11	0.24	0.01	0.02	0.04	0.04
Medial vestibular nucleus	61840	0.04	0.03	0.1	0.01	0.1	0.02	0	0.05	0.04
Vestibulospinal neurons	8312	0.02	0.05	0.05	0.01	0.15	0.01	0	0.04	0.05
Spiral fiber neurons	1320	0.02	0.03	0.01	0.01	0.08	0.01	0	0.04	0.05
Mauthner neuron	38760	0.02	0.03	0.06	0.01	0.07	0.01	0	0.04	0.04
Lateral reticular nucleus	7104	0.1	0.05	0.02	0.02	0.08	0.11	0	0.05	0.19
Tangential vestibular nucleus	36496	0.03	0.03	0.07	0.01	0.12	0.01	0	0.04	0.05
Inferior olive	54600	0.19	0.06	0.02	0.02	0.19	0.03	0	0.03	0.2
Inferior raphe	26576	0.02	0.02	0.01	0.11	0.24	0.02	0	0.03	0.03
Vagal region	100592	0.07	0.13	0.02	0.06	0.06	0.12	0	0.05	0.21
Area postrema	10056	0.05	0.02	0.01	0.07	0.05	0.06	0	0.06	0.31
Hindbrain efferent
Trochlear nucleus	24872	0.02	0.01	0	0.01	0.05	0.28	0	0.04	0.02
Trigeminal motor neurons - anterior	70472	0.01	0.05	0.01	0	0.04	0.1	0	0.03	0.04
Trigeminal motor neurons - posterior	17040	0.02	0.03	0.02	0.01	0.06	0.21	0	0.03	0.05
Facial octavolateralis motor neurons	67440	0.03	0.02	0.06	0.01	0.05	0.44	0	0.04	0.03
Vagus motor neurons	169064	0.03	0.18	0.04	0.01	0.04	0.8	0	0.05	0.13
Tract
Anterior commissure	130056	0.05	0.05	0	0.03	0.07	0	0	0.05	0.08
Postoptic commissure	61496	0.03	0.02	0	0	0.02	0	0	0.02	0.02
Posterior commissure	38832	0.02	0.09	0.01	0.01	0.04	0	0	0.05	0.06
Optic chiasm	60536	0.02	0.01	0	0	0.01	0	0	0.02	0.01
Optic tract - AF1	2616	0.04	0.03	0	0.01	0.03	0	0	0.03	0.03
Optic tract - AF2	6432	0.03	0.02	0	0.01	0.03	0	0	0.03	0.03
Optic tract - AF3	17968	0.03	0.02	0	0.01	0.05	0.01	0	0.05	0.05
Optic tract - AF4	54216	0.03	0.02	0	0	0.04	0	0	0.04	0.02
Optic tract - AF5	5168	0.04	0.04	0.01	0.02	0.07	0.01	0	0.07	0.03
Optic tract - AF6	8296	0.04	0.02	0	0	0.06	0	0	0.06	0.04
Optic tract - AF7	12064	0.1	0.02	0.01	0	0.08	0.03	0	0.1	0.01
Optic tract - AF8	688	0.04	0.04	0.01	0.03	0.05	0.02	0	0.08	0.03
Optic tract - AF9	33032	0.05	0.05	0.02	0.02	0.1	0.01	0	0.08	0.03
Peripheral NS
Olfactory epithelium	571520	0.26	0	0	0	0.04	0	0	0.04	0.01
Trigeminal ganglion	124832	0.17	0.01	0	0.02	0.07	0.01	0	0.02	0
Facial sensory ganglion	18072	0.21	0.02	0	0.01	0.08	0	0	0.02	0.02
Vagal ganglion	144752	0.13	0	0	0.02	0.11	0.01	0	0.02	0.01
Anterior lateral line ganglion	61600	0.09	0.02	0	0.02	0.05	0.01	0	0.02	0.01
Posterior lateral line ganglion	104336	0.02	0	0	0.02	0.03	0	0	0.02	0
Statoacoustic ganglion	139944	0.03	0.03	0	0.01	0.03	0.01	0	0.02	0.08
Supplementary File 4. Relative expression level of cell-type markers within Z-brain anatomical subdivisions
Values represent the mean expression intensity within each region, after scaling intensities within each transgene in the range 0-1
