# Supplementary material for: Brain-wide cellular resolution imaging of Cre transgenic zebrafish lines for functional circuit-mapping
Source: eLife. 2019 Feb 8;8:e42687. doi: 10.7554/eLife.42687 (PMC6392497; doi:10.7554/eLife.42687)
Supplement: Supplementary file 5. — Mean expression levels of transgenic markers in computationally defined neuroanatomical regions. [file elife-42687-supp5.xlsx]

## Sheet: Pajevic expression
Region ID	Structure	Size (µm³)	Glutamatergic	GABAergic	Glycinergic	Catecholaminergic	Serotonergic	Cholinergic	Dopaminergic	Hypocretin	Glial
1	Hypothalamus - Intermediate Zone	208064	0.07	0.02	0	0	0.01	0.01	0	0.02	0.02
3	Optic tectum - neuropil	311128	0.12	0.08	0.02	0.01	0.09	0.03	0	0.07	0.01
4	Rhombomere 5 - Ventromedial	136368	0.02	0.03	0.03	0.02	0.06	0.02	0	0.04	0.04
5	Pallium	423752	0.2	0	0	0	0.03	0	0	0.05	0.05
6	Rhombomere 7	175064	0.08	0.19	0.04	0.04	0.15	0.13	0	0.07	0.14
7	Rhombomere 7 - Ventromedial	206888	0.05	0.04	0.07	0	0.05	0.47	0	0.04	0.37
8	Hypothalamus - Intermediate Zone	401624	0.17	0.04	0	0.01	0.04	0	0	0.03	0.06
9	Rhombomere 3,4 - Dorso medial	214384	0.02	0.02	0.02	0.01	0.02	0	0	0.03	0.03
10	Posterior tuberculum	384944	0.07	0.02	0	0.04	0.07	0	0.02	0.05	0.06
11	Hypothalamus - Rostral	262520	0.05	0.03	0	0.01	0.03	0	0	0.04	0.04
12	Rhombomere 2-6 - Lateral neuropil	235104	0.12	0.09	0.09	0.02	0.29	0.01	0.01	0.08	0.09
14	Statoacoustic ganglion	136872	0.07	0.02	0	0.01	0.04	0	0	0.02	0.03
15	Optic tectum - neuropil	458744	0.05	0.15	0.01	0	0.02	0.02	0	0.1	0.01
16	Eminentia granularis	294696	0.05	0.05	0.01	0	0.07	0.01	0	0.03	0.06
17	Olfactory epithelium	465176	0.29	0	0	0	0.04	0	0	0.04	0.01
18	Tegmentum	205736	0.15	0.05	0.01	0.01	0.11	0.04	0	0.03	0.04
19	Tangential vestibular nucleus	169056	0.03	0.05	0.04	0.01	0.1	0.01	0	0.04	0.08
20	Hypothalamus - Intermediate Zone	245880	0.08	0.04	0	0.09	0.02	0	0	0.02	0.02
21	Rhombomere 4	118008	0.06	0.08	0.1	0.02	0.1	0.01	0	0.04	0.1
22	Optic tectum - stratum periventriculare	421408	0.13	0.08	0	0	0.02	0.01	0	0.05	0
23	Rhombomere 6,7 - Ventrolateral	219288	0.05	0.1	0.03	0.02	0.11	0.08	0	0.04	0.18
24	Neuropil adjacent to IPN	196832	0.06	0.08	0	0.05	0.06	0.01	0	0.02	0.07
25	Hypothalamus - Intermediate Zone	396792	0.08	0.02	0	0.01	0.01	0	0	0.01	0.01
26	Subpallium	338576	0.04	0.15	0	0.05	0.05	0	0	0.04	0.1
27	Rhombomere 6,7 - Ventrolateral	145160	0.06	0.11	0.03	0.02	0.08	0.21	0	0.06	0.17
28	Rhombomere 2 - Ventral	113920	0.02	0.05	0	0.01	0.06	0.05	0	0.03	0.05
29	Vagal ganglion	193680	0.12	0	0	0.02	0.09	0.01	0	0.02	0.01
30	Tegmentum	269232	0.03	0.07	0	0	0.02	0.01	0	0.03	0.03
31	Rhombomere 7 - Ventromedial domain	127176	0.02	0.03	0.04	0.03	0.12	0.33	0	0.04	0.13
32	Inferior olive	105416	0.17	0.08	0.02	0.02	0.18	0.03	0	0.04	0.2
33	Interpeduncular nucleus tegmentum	150152	0.05	0.11	0	0.04	0.05	0.01	0	0.03	0.07
34	Rhombomere 7 - Anterior glycinergic cluster	135744	0.07	0.09	0.17	0.01	0.08	0.13	0	0.04	0.08
35	Torus semicircularis	483448	0.09	0.16	0	0	0.04	0.01	0	0.03	0.07
36	Rhombomere 7 - Rostral	184608	0.07	0.12	0.05	0.04	0.13	0.19	0	0.06	0.13
37	Pallium	309696	0.07	0.01	0	0	0.02	0	0	0.04	0.06
38	Preoptic area - Lateral	169592	0.02	0.01	0	0	0.02	0	0	0.04	0.03
39	Vagus motor neurons	252520	0.04	0.29	0.04	0.02	0.04	0.61	0	0.05	0.17
40	Optic tectum - neuropil	753944	0.08	0.13	0.01	0.01	0.04	0.04	0	0.09	0.01
41	Habenula	300040	0.37	0	0.01	0	0.05	0	0	0.05	0.02
42	Migrated pretectal area M1	177040	0.05	0.03	0.01	0.01	0.06	0.01	0	0.06	0.03
43	Rhombomere 3,4 - Ventromedial	116856	0.02	0.03	0.01	0.02	0.09	0	0	0.03	0.06
44	Rhombomere 7 - Dorsolateral	207888	0.13	0.24	0.01	0.02	0.06	0.07	0	0.05	0.19
46	Rhombomere 2 - Ventrolateral	172336	0.06	0.04	0.01	0.02	0.1	0.03	0	0.03	0.13
47	Rhombomere 6 - Dorsal glutamatergic neurons	180224	0.56	0.01	0.03	0.01	0.25	0	0	0.05	0.13
48	VentralThalamus	373376	0.05	0.03	0	0	0.02	0	0	0.04	0.05
49	Rhombomere 3,4,5 - Ventolateral	207960	0.03	0.04	0.01	0.01	0.06	0.04	0	0.03	0.11
50	Rhombomere 5 - Dorsomedial	143640	0.03	0.03	0.04	0.03	0.03	0.02	0	0.04	0.04
51	Medulla oblongata - Anterior ventral	293448	0.02	0.03	0	0.03	0.04	0	0	0.02	0.04
52	Valvula cerebelli	162504	0.04	0.01	0	0.01	0.02	0.01	0	0.05	0.04
53	Optic tectum - stratum periventriculare	405920	0.05	0.03	0	0	0	0.01	0	0.05	0
54	Hypothalamus - Intermediate Zone	822016	0.08	0.04	0	0.02	0.03	0	0	0.03	0.04
55	Rhombomere 3,4 - Medial	159408	0.02	0.06	0.05	0	0.05	0.01	0	0.03	0.06
56	Rhombomere 7 - Rostrolateral	211576	0.09	0.25	0.03	0.03	0.17	0.04	0	0.08	0.15
57	Rhombomere 7 - Intermediate	185824	0.07	0.1	0.07	0.05	0.15	0.16	0.01	0.06	0.16
58	Hypothalamus - Caudal Zone	337464	0.04	0.02	0	0.2	0.02	0	0.02	0.02	0.02
59	Rhombomere 5	152496	0.07	0.04	0.11	0.02	0.11	0	0	0.04	0.05
60	Rhombomere 7 - Dorsocaudal	86136	0.06	0.05	0.09	0.02	0.09	0.13	0	0.07	0.24
61	Preoptic area	264968	0.05	0.05	0	0.02	0.04	0	0	0.04	0.06
62	Torus longitudinalis	84928	0.11	0.03	0	0	0.01	0	0	0.06	0.01
63	Rhombomere 7 - Dorsocaudal	217760	0.07	0.04	0.09	0.01	0.03	0.08	0	0.05	0.28
64	Rhombomere1	211520	0.04	0.13	0	0	0.03	0	0	0.03	0.03
65	Rhombomere 3,4	54576	0.06	0.05	0.14	0.02	0.33	0.01	0	0.05	0.06
66	Pituitary	231576	0.03	0.01	0	0.01	0.01	0	0	0.01	0.01
67	Rhombomere 7 - Medial	179760	0.07	0.11	0.07	0	0.04	0.26	0	0.04	0.17
68	Tegmentum	132560	0.02	0.02	0	0.01	0.06	0.17	0	0.04	0.04
69	Medial tectal band	678480	0.04	0.18	0	0	0.01	0.02	0	0.04	0.02
70	Rhombomere 5 - Dorsal	157192	0.23	0.01	0.02	0	0.09	0	0	0.04	0.1
71	Locus coeruleus	92440	0.07	0.04	0.02	0.05	0.23	0.02	0.01	0.03	0.07
73	Rhombomere 3-5 - Ventrolateral	193936	0.03	0.05	0	0.02	0.04	0.01	0	0.03	0.09
74	TorusSemicircularis	194232	0.14	0.03	0	0	0.03	0	0	0.02	0.02
75	Subpallium	310096	0.03	0.03	0	0.01	0.02	0	0	0.03	0.07
76	Pallium	430656	0.07	0.01	0	0.02	0.04	0	0	0.07	0.11
77	Rhombomere 3 - Dorsolateral	244232	0.37	0.03	0.04	0.01	0.25	0	0	0.04	0.12
78	PosteriorTuberculum	209744	0.03	0.03	0	0.02	0.06	0.01	0	0.05	0.06
79	Superior raphe	187248	0.02	0.06	0	0.2	0.14	0.02	0	0.03	0.03
80	Rhombomere 7	179120	0.04	0.04	0.12	0.02	0.08	0.46	0	0.06	0.22
81	Rhombomere 5,6 - Ventromedial	234272	0.03	0.06	0.01	0.01	0.05	0.04	0	0.03	0.09
82	Medulla oblongata - Rostrolateral domain	223664	0.03	0.14	0.02	0.01	0.09	0	0	0.05	0.05
83	Optic tectum - neuropil	219032	0.05	0.11	0.01	0.01	0.01	0.01	0	0.1	0.01
84	Pretectum	438616	0.04	0.09	0.01	0.03	0.04	0	0	0.04	0.05
85	Medial vestibular nucleus	174728	0.03	0.04	0.03	0.02	0.09	0.01	0	0.04	0.06
86	Mesencephalon	191936	0.02	0.09	0	0.01	0.05	0.01	0	0.03	0.05
87	Mauthner neuron	104488	0.02	0.03	0.04	0.01	0.06	0.01	0	0.04	0.05
88	Rhombomere 3	187936	0.03	0.04	0.01	0.01	0.07	0.02	0	0.03	0.06
89	Optic tectum - stratum periventriculare	1052512	0.13	0.11	0.01	0	0.06	0.02	0	0.04	0.01
90	Statoacoustic ganglion	241424	0.01	0.02	0	0.01	0.02	0.01	0	0.02	0.06
93	Tegmentum	317792	0.09	0.02	0.01	0.01	0.12	0.01	0	0.04	0.04
94	Valvula cerebelli	548416	0.05	0.05	0	0	0.01	0.01	0	0.04	0.02
95	Rhombomere 7 - Dorsomedial	183040	0.23	0.05	0.02	0.04	0.15	0.01	0	0.05	0.12
96	Rhombomere 7 - Ventromedial	82368	0.03	0.01	0.01	0.02	0.04	0.34	0	0.03	0.39
97	Rhombomere 2 - Ventromedial	284192	0.02	0.05	0	0.02	0.04	0	0	0.03	0.07
98	Hypothalamus - Rostral Zone	390472	0.04	0.01	0	0.01	0.01	0	0	0.02	0.01
99	Optic tract - AF4	108784	0.04	0.02	0.01	0.01	0.06	0.01	0	0.06	0.03
100	Rhombomere 5,6	174424	0.06	0.07	0.09	0.02	0.14	0.06	0	0.05	0.07
101	Torus semicircularis	306512	0.16	0.08	0	0.01	0.1	0.01	0	0.03	0.1
102	Trigeminal motor neurons - anterior	155856	0.02	0.07	0.01	0	0.03	0.01	0	0.03	0.04
103	Olfactory bulb	244976	0.23	0.03	0.01	0.04	0.07	0	0	0.06	0.16
104	Preoptic area	322384	0.03	0.02	0	0.01	0.03	0	0	0.03	0.07
105	Corpus cerebelli	332800	0.05	0.22	0.01	0.01	0.05	0.01	0	0.08	0.09
106	Rhombomere 7	279464	0.08	0.11	0.04	0.03	0.17	0.07	0	0.05	0.12
107	Hypothalamus - Caudal Zone	203968	0.09	0.05	0	0.03	0.03	0	0	0.02	0.04
108	Locus coeruleus	138968	0.15	0.03	0.02	0.05	0.24	0.06	0	0.03	0.04
109	Rhombomere 6 - Dorsomedial	164472	0.13	0.11	0.09	0.02	0.14	0.01	0	0.04	0.09
110	Migrated posterior tubercular area M2	180464	0.14	0.03	0	0.01	0.06	0	0	0.03	0.06
111	Anterior lateral line ganglion	197848	0.06	0.02	0	0.01	0.03	0.01	0	0.02	0.02
112	Optic tectum - neuropil	683960	0.05	0.17	0.01	0	0.04	0.03	0	0.11	0.01
113	Rhombomere 6,7 - Ventromedial	222536	0.05	0.07	0.08	0.02	0.11	0.07	0	0.05	0.06
115	Rhombomere 7 - Ventral	145376	0.07	0.09	0.05	0.03	0.12	0.21	0	0.05	0.25
116	Griseum tectale	287464	0.11	0.03	0.01	0	0.06	0.01	0	0.07	0.01
118	Postoptic commissure	134488	0.03	0.03	0	0.01	0.03	0	0	0.04	0.04
119	Rhombomere 7 - Dorsomedial	109992	0.04	0.16	0.03	0.01	0.02	0.11	0	0.04	0.47
120	Hypothalamus - Intermediate Zone	206896	0.13	0.02	0	0.02	0.05	0	0	0.02	0.02
121	Rhombomere 7 - Dorsomedial	124976	0.01	0.05	0	0.01	0.01	0.04	0	0.05	0.38
122	Rhombomere 7 - Dorsomedial	167288	0.06	0.23	0.03	0.01	0.03	0.06	0	0.04	0.24
123	Rhombomere 3	175440	0.07	0.14	0.03	0.01	0.09	0.01	0	0.04	0.08
124	Trigeminal ganglion	83656	0.1	0.01	0	0.01	0.03	0	0	0.02	0
125	Tegmentum	499008	0.05	0.1	0.01	0.01	0.09	0.01	0	0.04	0.06
126	Rhombomere 5,6 - Dorsomedial	124664	0.02	0.02	0.01	0	0.01	0.01	0	0.05	0.18
127	Rhombomere 6 - Lateral	164920	0.24	0.07	0.12	0.02	0.56	0.01	0	0.07	0.1
128	Trigeminal ganglion	100568	0.21	0.01	0	0.02	0.09	0.01	0	0.02	0.01
129	Ventral thalamus	288488	0.06	0.04	0	0.01	0.08	0.01	0	0.05	0.07
130	Torus semicircularis	198736	0.17	0.05	0	0.02	0.18	0.01	0	0.03	0.1
131	Corpus cerebelli	517976	0.14	0.22	0.01	0	0.07	0.01	0	0.05	0.05
132	Vagal region	123120	0.08	0.09	0.01	0.04	0.05	0.05	0	0.05	0.18
133	Pallium	167440	0.09	0	0	0.01	0	0	0	0.05	0.09
135	Hypothalamus - Intermediate Zone	293456	0.06	0.06	0	0.03	0.06	0.01	0	0.03	0.08
137	Anterior commissure	336768	0.06	0.05	0	0.04	0.09	0	0	0.05	0.08
138	Thalamus	277688	0.09	0.02	0	0.03	0.05	0.01	0	0.04	0.04
139	Tegmentum	349800	0.08	0.05	0.01	0.01	0.11	0.01	0	0.05	0.06
140	Rhombomere 1,2 - Ventral	122280	0.06	0.06	0	0.03	0.09	0.01	0	0.03	0.09
141	Facial octavolateralis motor neurons	184184	0.06	0.03	0.08	0.01	0.06	0.31	0	0.04	0.04
142	Rhombomere 7 - Medial stripe	170736	0.06	0.09	0.1	0.01	0.07	0.58	0	0.04	0.11
143	Torus semicircularis	290552	0.13	0.06	0	0.01	0.09	0.01	0	0.04	0.07
144	Rhombomere 7 - Rostroventral	119856	0.06	0.1	0.01	0.08	0.13	0.02	0	0.04	0.1
145	Rhombomere 7 - Ventral	168736	0.1	0.1	0.08	0.02	0.14	0.16	0	0.05	0.09
146	Optic tract - AF2	93648	0.05	0.02	0	0.01	0.03	0	0	0.03	0.03
147	Tegmentum	186968	0.04	0.08	0	0.04	0.09	0.01	0	0.03	0.08
148	Medial vestibular nucleus	135584	0.03	0.04	0.09	0	0.04	0.02	0	0.04	0.04
149	Area postrema	101592	0.05	0.06	0.01	0.03	0.04	0.15	0	0.06	0.32
150	Rhombomere 7	179872	0.13	0.08	0.03	0.02	0.26	0.02	0	0.05	0.11
151	Mesencephalon	161976	0.04	0.02	0	0	0.01	0.01	0	0.03	0.01
152	Hypothalamus - Rostral Zone	259576	0.03	0.02	0	0.03	0.02	0	0.02	0.09	0.04
153	Vagus motor neurons	162704	0.04	0.14	0.08	0.03	0.06	0.52	0	0.05	0.18
154	Vestibulospinal neurons	191128	0.03	0.05	0.07	0.01	0.14	0.02	0	0.04	0.06
155	Optic tectum - stratum periventriculare	1073704	0.14	0.1	0	0	0.02	0.03	0	0.04	0
156	Rhombomere 7	114072	0.06	0.03	0.06	0.02	0.11	0.28	0	0.07	0.27
157	Rhombomere 2	159456	0.07	0.09	0.01	0.01	0.1	0.03	0	0.04	0.06
159	Posterior lateral line ganglion	126856	0.03	0	0	0.02	0.03	0.01	0	0.02	0
160	Torus semicircularis	270176	0.12	0.09	0.01	0.02	0.16	0.01	0	0.04	0.12
161	Tegmentum	311088	0.04	0.06	0.01	0.01	0.1	0.01	0	0.05	0.03
162	Rhombomere 1,2 - Ventral	132560	0.03	0.08	0	0.08	0.06	0	0	0.03	0.06
163	Optic chiasm	223224	0.02	0.01	0	0	0.01	0	0	0.02	0.01
164	Rhombomere 7	115312	0.07	0.13	0.15	0.01	0.06	0.45	0	0.04	0.19
166	Rhombomere 7 - Caudal	65000	0.04	0.04	0.03	0.03	0.13	0.32	0	0.05	0.26
167	Inferior raphe	119336	0.02	0.03	0.01	0.08	0.15	0.01	0	0.03	0.05
168	Corpus cerebelli	140264	0.18	0.21	0.03	0.01	0.2	0.01	0	0.04	0.06
169	Rhombomere 2 - Dorsomedial	160984	0.02	0.03	0	0	0.01	0	0	0.03	0.02
170	Pineal complex	60576	0.07	0	0.05	0.01	0.03	0.01	0.01	0.07	0.03
171	Rhombomere 3-6 - Lateral neuropil	154608	0.04	0.06	0.09	0.01	0.18	0.01	0.01	0.07	0.06
172	Preoptic area	356872	0.03	0.05	0	0	0.02	0	0	0.02	0.05
173	NucMLF	69144	0.04	0.03	0.03	0.02	0.25	0.02	0	0.06	0.02
174	Cerebellar neuropil	107512	0.15	0.03	0.02	0.02	0.14	0.02	0	0.04	0.05
175	Eminentia granularis	149232	0.05	0.07	0.02	0.01	0.15	0.01	0	0.04	0.09
176	Hypothalamus - Rostral Zone	228464	0.03	0.02	0	0	0.02	0	0	0.03	0.03
177	Olfactory bulb	331112	0.09	0.05	0	0.05	0.04	0	0	0.04	0.2
178	Optic tract - AF9	139440	0.06	0.05	0.02	0.02	0.09	0.01	0	0.07	0.03
179	Posterior lateral line ganglion nerve	59256	0.07	0.01	0.01	0.02	0.13	0.16	0	0.04	0.08
180	Pallium	271000	0.08	0.02	0	0.05	0.05	0	0	0.07	0.07
Supplementary File 5. Relative expression level of cell-type markers within computationally defined brain regions
Values represent the mean expression intensity within each region, after scaling intensities within each transgene in the range 0-1
